# Supplementary material
Source: publisher figshare collection journal article supplement (https://gsapubs.figshare.com/ndownloader/files/23310278)
Supplement: Supplementary file 1 [file 23310278]

## Sheet: Izu-Bonin
Year	CITATION	SAMPLE NAME	LOCATION	ROCK TYPE	ROCK NAME	kcode	Setting	TYPE OF MATERIAL	TIO2(WT%)	Ti	Sc	V	Y	Zr	Nb	La	Ce	Nd	Sm	Eu	Gd	Dy	Er	Yb	Lu	Hf	Th
2016	[20417] FREYMUTH H. (2016)	samp. 881105-2 LAVA	IZU-BONIN ARC / IZU ARC / AOGASHIMA/AO-GA-SIMA / AOGASHIMA/AO-GA-SIMA / PACIFIC OCEAN	VOLCANIC ROCK	ANDESITE	1	Arc	WHOLE ROCK	1.13	6772.64	38.016	96.7	42.02	91.24	1.146	4.312	13.13	13.031	4.396	1.57	6.083	7.025	4.341	4.304	0.678	2.872	0.388
1998	[2328] TAYLOR R. N. (1998)	samp. TR02	IZU-BONIN ARC / IZU ARC / TORISHIMA/MITUGO-YAMA / TORISHIMA/MITUGO-YAMA / PACIFIC OCEAN	VOLCANIC ROCK	ANDESITE	1	Arc	WHOLE ROCK	0.589	3530.17	29.4	247	15.4	29.5	0.29	1.17	3.64	3.673	1.38	0.557	1.89	2.39	1.55	1.54	0.24	0.86	0.132
1998	[2328] TAYLOR R. N. (1998)	samp. TR05	IZU-BONIN ARC / IZU ARC / TORISHIMA/MITUGO-YAMA / TORISHIMA/MITUGO-YAMA / PACIFIC OCEAN	VOLCANIC ROCK	ANDESITE	1	Arc	WHOLE ROCK	0.626	3751.92	29.7	307	17	32.2	0.31	1.47	4.61	4.654	1.68	0.631	2.3	2.86	1.92	1.95	0.31	1.11	0.139
1998	[2328] TAYLOR R. N. (1998)	samp. AG07	IZU-BONIN ARC / IZU ARC / AOGASHIMA/AO-GA-SIMA / AOGASHIMA/AO-GA-SIMA / PACIFIC OCEAN	VOLCANIC ROCK	ANDESITE	1	Arc	WHOLE ROCK	1.075	6443	47.1	416	21.6	31.3	0.35	1.38	4.67	5.1	1.99	0.82	2.82	3.53	2.3	2.31	0.36	1.06	0.106
1998	[2328] TAYLOR R. N. (1998)	samp. TR01A	IZU-BONIN ARC / IZU ARC / TORISHIMA/MITUGO-YAMA / TORISHIMA/MITUGO-YAMA / PACIFIC OCEAN	VOLCANIC ROCK	ANDESITE	1	Arc	WHOLE ROCK	0.784	4698.9	35.5	337	22	40.9	0.39	1.8	5.78	5.925	2.17	0.807	2.88	3.51	2.34	2.34	0.37	1.26	0.16
1998	[2328] TAYLOR R. N. (1998)	samp. NJ22	IZU-BONIN ARC / IZU ARC / NIISHIMA /NII-ZIMA/NIIJIMA / NIISHIMA /NII-ZIMA/NIIJIMA / PACIFIC OCEAN	VOLCANIC ROCK	ANDESITE	1	Arc	WHOLE ROCK	1.198	7180.2	45	505	19.12	43.4	0.97	2.72	7.12	6.05	1.98	0.81	2.78	3.08	2.01	1.72	0.32	1.2	0.38
1998	[2328] TAYLOR R. N. (1998)	samp. 781/12	IZU-BONIN ARC / IZU ARC / IZU-OSHIMA / OSHIMA / PACIFIC OCEAN	VOLCANIC ROCK	ANDESITE	1	Arc	WHOLE ROCK	1.134	6796.62	52.1	587	21.9	45.5	0.62	2.24	6.92	6.29	2.23	0.85	3	3.78	2.44	2.45	0.39	1.5	0.29
1998	[2328] TAYLOR R. N. (1998)	samp. NJ06	IZU-BONIN ARC / IZU ARC / NIISHIMA /NII-ZIMA/NIIJIMA / NIISHIMA /NII-ZIMA/NIIJIMA / PACIFIC OCEAN	VOLCANIC ROCK	ANDESITE	1	Arc	WHOLE ROCK	1.179	7066.32	44.6	450	18.4	49.4	1.16	3.13	9.1	7.17	2.25	0.874	2.76	3.11	2	1.92	0.3	1.27	0.37
1998	[2328] TAYLOR R. N. (1998)	samp. JB-2	IZU-BONIN ARC / IZU ARC / IZU-OSHIMA / OSHIMA / PACIFIC OCEAN	VOLCANIC ROCK	ANDESITE	1	Arc	WHOLE ROCK	1.202	7204.17	52.7	605	23.7	49.8	0.51	2.15	6.76	6.51	2.35	0.868	3.23	4.02	2.63	2.7	0.41	1.62	0.261
1998	[2328] TAYLOR R. N. (1998)	samp. MY31	IZU-BONIN ARC / IZU ARC / MIYAKEJIMA/MIYAKE-ZIMA / MIYAKEJIMA/MIYAKE-ZIMA / PACIFIC OCEAN	VOLCANIC ROCK	ANDESITE	1	Arc	WHOLE ROCK	1.231	7377.98	49.6	427	24.5	49.5	0.48	2.43	7.82	7.58	2.73	1.051	3.72	4.59	2.92	2.95	0.48	1.76	0.224
1998	[2328] TAYLOR R. N. (1998)	samp. TO09	IZU-BONIN ARC / IZU ARC / TOSHIMA / PACIFIC OCEAN	VOLCANIC ROCK	ANDESITE	1	Arc	WHOLE ROCK	0.933	5591.93		286	16.9	53.7	1.46	4.71	13.06	9.609	2.57	0.913	3.11	3.13	1.92	1.8	0.28	1.52	0.494
1998	[2328] TAYLOR R. N. (1998)	samp. TO13	IZU-BONIN ARC / IZU ARC / TOSHIMA / PACIFIC OCEAN	VOLCANIC ROCK	ANDESITE	1	Arc	WHOLE ROCK	0.891	5340.2	32.9	288	18.1	56.4	1.44	5.77	14.92	10.411	2.68	0.925	3.01	2.91	1.71	1.66	0.25	1.52	0.622
1998	[2328] TAYLOR R. N. (1998)	samp. MY14	IZU-BONIN ARC / IZU ARC / MIYAKEJIMA/MIYAKE-ZIMA / MIYAKEJIMA/MIYAKE-ZIMA / PACIFIC OCEAN	VOLCANIC ROCK	ANDESITE	1	Arc	WHOLE ROCK	1.388	8318.96	42.1	451	27.6	71	0.57	2.92	9.14	8.31	2.86	1.005	3.86	4.6	3.07	3.1	0.49	2.06	0.238
1998	[2328] TAYLOR R. N. (1998)	samp. MY35	IZU-BONIN ARC / IZU ARC / MIYAKEJIMA/MIYAKE-ZIMA / MIYAKEJIMA/MIYAKE-ZIMA / PACIFIC OCEAN	VOLCANIC ROCK	ANDESITE	1	Arc	WHOLE ROCK	1.375	8241.05	43.4	448	30.5	68.7	0.68	3.39	10.45	9.49	3.31	1.184	4.27	5.18	3.21	3.27	0.52	2.07	0.325
1998	[2328] TAYLOR R. N. (1998)	samp. AG03	IZU-BONIN ARC / IZU ARC / AOGASHIMA/AO-GA-SIMA / AOGASHIMA/AO-GA-SIMA / PACIFIC OCEAN	VOLCANIC ROCK	ANDESITE	1	Arc	WHOLE ROCK	1.149	6886.52	31.6	262	31.6	79.1	0.76	2.84	9.26	8.9	3.25	1.098	4.36	5.42	3.62	3.66	0.57	2.36	0.341
1998	[2328] TAYLOR R. N. (1998)	samp. TO04	IZU-BONIN ARC / IZU ARC / TOSHIMA / PACIFIC OCEAN	VOLCANIC ROCK	ANDESITE	1	Arc	WHOLE ROCK	0.834	4998.57	24.7	204	17.7	78.7	1.99	7.55	18.7	11.741	2.93	0.969	3.11	2.93	1.79	1.76	0.27	1.93	1.124
1998	[2328] TAYLOR R. N. (1998)	samp. TO16	IZU-BONIN ARC / IZU ARC / TOSHIMA / PACIFIC OCEAN	VOLCANIC ROCK	ANDESITE	1	Arc	WHOLE ROCK	0.82	4914.66	27.4	220	18.2	79.3	2.14	7.85	19.15	12.101	2.99	0.996	3.28	3.1	1.88	1.86	0.29	2.02	1.188
1998	[2328] TAYLOR R. N. (1998)	samp. MY20	IZU-BONIN ARC / IZU ARC / MIYAKEJIMA/MIYAKE-ZIMA / MIYAKEJIMA/MIYAKE-ZIMA / PACIFIC OCEAN	VOLCANIC ROCK	ANDESITE	1	Arc	WHOLE ROCK	1.359	8145.15	41.3	371	33.1	80	0.79	3.96	11.86	10.6	3.57	1.257	1.58	5.45	3.45	3.38	0.53	2.17	0.397
1998	[2328] TAYLOR R. N. (1998)	samp. TO05	IZU-BONIN ARC / IZU ARC / TOSHIMA / PACIFIC OCEAN	VOLCANIC ROCK	ANDESITE	1	Arc	WHOLE ROCK	0.812	4866.71	27.4	207	18.6	79.1	2.14	7.96	19.19	11.931	2.97	0.995	3.14	3.02	1.78	1.73	0.28	1.89	1.174
1998	[2328] TAYLOR R. N. (1998)	samp. AG60	IZU-BONIN ARC / IZU ARC / AOGASHIMA/AO-GA-SIMA / AOGASHIMA/AO-GA-SIMA / PACIFIC OCEAN	VOLCANIC ROCK	ANDESITE	1	Arc	WHOLE ROCK	1.184	7096.29	31.3	79	38.1	94	0.87	4.27	13.32	12.77	4.39	1.525	5.65	6.91	4.35	4.3	0.68	2.7	0.382
2007	[10515] ISHIZUKA O.(2007) [GeoReM [3011] ]	samp. SOF1	IZU-BONIN ARC / BONIN ARC / SOFUGAN / SOFUGAN / PACIFIC OCEAN	VOLCANIC ROCK	ANDESITE	1	Arc	WHOLE ROCK					29.3	50.6	0.69	2.49	7.25	7.35	2.71	0.94	3.59	4.42	2.88	3.02	0.47	1.75	0.21
2007	[10515] ISHIZUKA O.(2007) [GeoReM [3011] ]	samp. SOF2	IZU-BONIN ARC / BONIN ARC / SOFUGAN / SOFUGAN / PACIFIC OCEAN	VOLCANIC ROCK	ANDESITE	1	Arc	WHOLE ROCK					33.4	54.1	0.75	2.56	7.41	7.41	2.48	0.93	3.68	4.66	2.94	3.06	0.48	1.6	0.21
2006	[10783] ISHIZUKA O.(2006) [GeoReM [2502] ]	samp. 826R8	IZU-BONIN ARC / IZU ARC / BONIN RIDGE / PACIFIC OCEAN	VOLCANIC ROCK	ANDESITE	1	Arc	WHOLE ROCK	0.33	1977.85			8.31	29.07	0.6	1.82	3.8	3.03	0.96	0.35	1.14	1.47	0.88	0.96	0.15	0.82	0.18
2006	[10783] ISHIZUKA O.(2006) [GeoReM [2502] ]	samp. 824R9	IZU-BONIN ARC / IZU ARC / BONIN RIDGE / PACIFIC OCEAN	VOLCANIC ROCK	ANDESITE	1	Arc	WHOLE ROCK	0.54	3236.48			14.57	41.11	1.55	6.29	20.35	8.39	2.34	0.77	2.62	2.94	1.6	1.79	0.27	1.13	0.86
2006	[10783] ISHIZUKA O.(2006) [GeoReM [2502] ]	samp. 823R8	IZU-BONIN ARC / IZU ARC / BONIN RIDGE / PACIFIC OCEAN	VOLCANIC ROCK	ANDESITE	1	Arc	WHOLE ROCK	0.63	3775.9			15.33	49.72	1.97	7.35	14.44	8.81	2.26	0.77	2.55	2.77	1.56	1.61	0.25	1.44	1.03
2008	[12151] ISHIZUKA O. (2008)	samp. 05110515D	IZU-BONIN ARC / IZU ARC / HACHIJOJIMA/HATIZYO-ZIMA / HIGASHIYAMA / PACIFIC OCEAN	VOLCANIC ROCK	ANDESITE	1	Arc	WHOLE ROCK	0.51	3056.68			39.8	85.8	0.78	3.5	10.89	9.88	3.61	1.07	4.9	6.11	4.24	4.18	0.64	2.49	0.33
2003	[6564] YOKOYAMA TETSUYA(2003) [GeoReM [510] ]	samp. 0241	IZU-BONIN ARC / IZU ARC / MIYAKEJIMA/MIYAKE-ZIMA / MIYAKEJIMA/MIYAKE-ZIMA / PACIFIC OCEAN	VOLCANIC ROCK	ANDESITE	1	Arc	WHOLE ROCK	0.8	4794.79			33.7	81.5	0.72	4.78	13.4	11.3	3.43	1.18	4.08	5.03	3.08	3.5	0.5	2.52	0.496
2003	[6564] YOKOYAMA TETSUYA(2003) [GeoReM [510] ]	samp. 0228	IZU-BONIN ARC / IZU ARC / MIYAKEJIMA/MIYAKE-ZIMA / MIYAKEJIMA/MIYAKE-ZIMA / PACIFIC OCEAN	VOLCANIC ROCK	ANDESITE	1	Arc	WHOLE ROCK	0.81	4854.73			32.7	77.7	0.66	4.46	12.7	10.5	3.28	1.15	3.93	4.88	2.98	3.42	0.52	2.31	0.475
2003	[6564] YOKOYAMA TETSUYA(2003) [GeoReM [510] ]	samp. 0114	IZU-BONIN ARC / IZU ARC / MIYAKEJIMA/MIYAKE-ZIMA / MIYAKEJIMA/MIYAKE-ZIMA / PACIFIC OCEAN	VOLCANIC ROCK	ANDESITE	1	Arc	WHOLE ROCK	1.14	6832.58			44.1	87.5	0.68	4.68	13.4	13	4.27	1.44	5.63	6.66	3.87	4.32	0.62	2.71	0.471
2003	[6564] YOKOYAMA TETSUYA(2003) [GeoReM [510] ]	samp. 2818	IZU-BONIN ARC / IZU ARC / MIYAKEJIMA/MIYAKE-ZIMA / MIYAKEJIMA/MIYAKE-ZIMA / PACIFIC OCEAN	VOLCANIC ROCK	ANDESITE	1	Arc	WHOLE ROCK	1.15	6892.51			39.5	89.2	0.69	4.22	13	11.7	3.82	1.3	4.9	6.29	3.64	3.91	0.6	2.7	0.467
2001	[8556] SUN C.-H.(2001) [GeoReM [1231] ]	samp. IJ-6B	IZU-BONIN ARC / BONIN ARC / IWOJIMA/IO-SIMA/IOTO / IWOJIMA/IO-SIMA / PACIFIC OCEAN	VOLCANIC ROCK	ANDESITE	1	Arc	WHOLE ROCK	0.91	5454.08	13.2	96.6	40.6	234	8.15	60.5	114	59.2	10.5	2.49	8	6.73	3.8	3.75	0.61	5.53	11.2
2006	[9590] SHUKUNO H. (2006)	samp. 1393R6	IZU-BONIN ARC / IZU ARC / SUMISU CALDERA / PACIFIC OCEAN	VOLCANIC ROCK	ANDESITE	1	Arc	WHOLE ROCK	0.71	4255.38			22.8	64.5	0.7	2.93	8.23	7.52	2.48	0.816	3.38	4.04	2.68	2.68	0.415		0.7
2006	[9590] SHUKUNO H. (2006)	samp. 573R1	IZU-BONIN ARC / IZU ARC / SUMISU CALDERA / PACIFIC OCEAN	VOLCANIC ROCK	ANDESITE	1	Arc	WHOLE ROCK	0.91	5454.08			29.6	66.2	1	2.94	8.41	8.12	2.86	1	4.02	4.93	3.29	3.28	0.51		0.7
2007	[10515] ISHIZUKA O.(2007) [GeoReM [3011] ]	samp. SN03, 71907	IZU-BONIN ARC / IZU ARC / NISHINOSHIMA / NISHINOSHIMA / PACIFIC OCEAN	VOLCANIC ROCK	ANDESITE, 2-PYROXENE	1	Arc	WHOLE ROCK					36.8	104	2.46	7.84	18.3	13.8	4.42	1.26	4.71	5.85	3.75	3.89	0.55	2.92	0.77
2007	[10515] ISHIZUKA O.(2007) [GeoReM [3011] ]	samp. SN03, 71904	IZU-BONIN ARC / IZU ARC / NISHINOSHIMA / NISHINOSHIMA / PACIFIC OCEAN	VOLCANIC ROCK	ANDESITE, 2-PYROXENE	1	Arc	WHOLE ROCK					36.7	115	4.06	8.2	19.2	14.6	4.46	1.44	4.99	5.82	3.94	4.13	0.62	5.05	0.93
2007	[10515] ISHIZUKA O.(2007) [GeoReM [3011] ]	samp. SN03, 71909	IZU-BONIN ARC / IZU ARC / NISHINOSHIMA / NISHINOSHIMA / PACIFIC OCEAN	VOLCANIC ROCK	ANDESITE, 2-PYROXENE	1	Arc	WHOLE ROCK					40.7	117	2.85	8.99	20.5	16	4.99	1.43	5.51	6.54	4.32	4.37	0.64	3.38	0.85
2007	[10515] ISHIZUKA O.(2007) [GeoReM [3011] ]	samp. SN03, 719010	IZU-BONIN ARC / IZU ARC / NISHINOSHIMA / NISHINOSHIMA / PACIFIC OCEAN	VOLCANIC ROCK	ANDESITE, 2-PYROXENE	1	Arc	WHOLE ROCK					40.3	112	2.81	8.45	20	15.2	4.94	1.55	5.18	6.54	4.17	4.42	0.64	3.39	0.87
2007	[10515] ISHIZUKA O.(2007) [GeoReM [3011] ]	samp. SN03, 71903	IZU-BONIN ARC / IZU ARC / NISHINOSHIMA / NISHINOSHIMA / PACIFIC OCEAN	VOLCANIC ROCK	ANDESITE, 2-PYROXENE	1	Arc	WHOLE ROCK					39.3	126	4.5	9.45	20.7	15.8	5	1.55	5.39	6.62	4.36	4.45	0.67	3.58	0.99
2007	[10515] ISHIZUKA O.(2007) [GeoReM [3011] ]	samp. SN03, 71905	IZU-BONIN ARC / IZU ARC / NISHINOSHIMA / NISHINOSHIMA / PACIFIC OCEAN	VOLCANIC ROCK	ANDESITE, 2-PYROXENE	1	Arc	WHOLE ROCK					39.7	112	2.66	8.59	19.3	15.6	4.7	1.44	5.14	6.38	4.43	4.51	0.66	3.33	0.86
2016	[20417] FREYMUTH H. (2016)	samp. 24	IZU-BONIN ARC / IZU ARC / TORISHIMA/MITUGO-YAMA / TORISHIMA/MITUGO-YAMA / PACIFIC OCEAN	VOLCANIC ROCK	ANDESITE, BASALTIC	2	Arc	WHOLE ROCK			38.354	335.3	23.52	40.36	0.383	1.938	5.884	6.376	2.26	0.861	3.285	3.886	2.447	2.459	0.391	1.376	0.165
2016	[20417] FREYMUTH H. (2016)	samp. 1986A-1	IZU-BONIN ARC / IZU ARC / IZU-OSHIMA / OSHIMA / PACIFIC OCEAN	VOLCANIC ROCK	ANDESITE, BASALTIC	2	Arc	WHOLE ROCK	1.16	6952.45	51.97	572.7	23.97	45.82	0.491	2.129	6.421	6.329	2.242	0.827	3.267	3.934	2.48	2.47	0.39	1.482	0.247
2016	[20417] FREYMUTH H. (2016)	samp. T87071906	IZU-BONIN ARC / IZU ARC / AOGASHIMA/AO-GA-SIMA / AOGASHIMA/AO-GA-SIMA / PACIFIC OCEAN	VOLCANIC ROCK	ANDESITE, BASALTIC	2	Arc	WHOLE ROCK	1.33	7971.34	47.921	470	28.25	58.41	0.689	2.489	7.817	8.025	2.834	1.043	4.041	4.776	2.967	2.958	0.467	1.917	0.256
2016	[20417] FREYMUTH H. (2016)	samp. Y5-1	IZU-BONIN ARC / IZU ARC / IZU-OSHIMA / OSHIMA / PACIFIC OCEAN	VOLCANIC ROCK	ANDESITE, BASALTIC	2	Arc	WHOLE ROCK	1.23	7371.99	55.679	625.1	25.39	49.79	0.55	2.348	6.994	6.905	2.414	0.88	3.53	4.267	2.673	2.67	0.422	1.609	0.276
2016	[20417] FREYMUTH H. (2016)	samp. N4-1	IZU-BONIN ARC / IZU ARC / IZU-OSHIMA / OSHIMA / PACIFIC OCEAN	VOLCANIC ROCK	ANDESITE, BASALTIC	2	Arc	WHOLE ROCK	1.19	7132.25	54.628	581.5	24.87	49.51	0.563	2.39	7.124	6.899	2.369	0.859	3.429	4.107	2.586	2.579	0.408	1.575	0.279
2016	[20417] FREYMUTH H. (2016)	samp. 1983-2903	IZU-BONIN ARC / IZU ARC / MIYAKEJIMA/MIYAKE-ZIMA / MIYAKEJIMA/MIYAKE-ZIMA / PACIFIC OCEAN	VOLCANIC ROCK	ANDESITE, BASALTIC	2	Arc	WHOLE ROCK			46.605	462.5	31.68	69.87	0.658	3.36	9.962	9.712	3.299	1.19	4.551	5.242	3.227	3.199	0.505	2.159	0.324
2016	[20417] FREYMUTH H. (2016)	samp. MJ-12-02	IZU-BONIN ARC / IZU ARC / MIYAKEJIMA/MIYAKE-ZIMA / MIYAKEJIMA/MIYAKE-ZIMA / PACIFIC OCEAN	VOLCANIC ROCK	ANDESITE, BASALTIC	2	Arc	WHOLE ROCK	1.28	7671.67	42.434	396.6	31.21	70.87	0.632	3.363	10.126	9.748	3.271	1.16	4.524	5.233	3.242	3.174	0.507	2.196	0.334
2007	[10515] ISHIZUKA O.(2007) [GeoReM [3011] ]	samp. GH718-1	IZU-BONIN ARC / BONIN ARC / MINAMI-IWOJIMA / MINAMI-IWOJIMA / PACIFIC OCEAN	VOLCANIC ROCK	ANDESITE, BASALTIC	2	Arc	WHOLE ROCK					20.3	59.6	2.43	21.3	41.3	20.8	4.4	1.36	3.83	3.27	2.02	1.91	0.3	1.47	2.16
2007	[10515] ISHIZUKA O.(2007) [GeoReM [3011] ]	samp. GH669-1	IZU-BONIN ARC / BONIN ARC / SOFUGAN / SOFUGAN / PACIFIC OCEAN	VOLCANIC ROCK	ANDESITE, BASALTIC	2	Arc	WHOLE ROCK					24.3	44.1	0.73	2.55	6.98	6.53	2.28	0.82	2.98	3.55	2.36	2.33	0.37	1.3	0.24
2007	[10515] ISHIZUKA O.(2007) [GeoReM [3011] ]	samp. GH669-2	IZU-BONIN ARC / BONIN ARC / SOFUGAN / SOFUGAN / PACIFIC OCEAN	VOLCANIC ROCK	ANDESITE, BASALTIC	2	Arc	WHOLE ROCK					27.6	46.6	0.64	2.31	6.57	6.5	2.35	0.83	3.2	3.95	2.42	2.58	0.41	1.52	0.2
2007	[10515] ISHIZUKA O.(2007) [GeoReM [3011] ]	samp. GH706-3	IZU-BONIN ARC / BONIN ARC / KITA-IWOJIMA/KITA-IWO-TO / KITA-IWOJIMA/KITA-IWO-TO / PACIFIC OCEAN	VOLCANIC ROCK	ANDESITE, BASALTIC	2	Arc	WHOLE ROCK					31.4	84.3	1.42	7.87	17.5	13.9	3.91	1.28	4.66	5.1	3.22	3.07	0.49	2.42	0.93
2014	[20107] ISHIZUKA O. (2014)	samp. R07	IZU-BONIN ARC / IZU ARC / IZU-TOBU / IZU-TOBU / PACIFIC OCEAN	VOLCANIC ROCK	ANDESITE, BASALTIC	2	Arc	WHOLE ROCK	0.8	4794.79		257	18.4	59.2	1.33	5.31	13.9	9.27	2.39	0.87	2.75	2.71	1.72	1.63	0.25	1.51	0.41
2014	[20107] ISHIZUKA O. (2014)	samp. R06	IZU-BONIN ARC / IZU ARC / IZU-TOBU / IZU-TOBU / PACIFIC OCEAN	VOLCANIC ROCK	ANDESITE, BASALTIC	2	Arc	WHOLE ROCK	0.83	4974.6		225	19.5	59.7	1.45	5.44	14.3	10.1	2.72	0.98	3.1	3.17	1.97	1.81	0.29	1.51	0.39
2014	[20107] ISHIZUKA O. (2014)	samp. R08	IZU-BONIN ARC / IZU ARC / IZU-TOBU / IZU-TOBU / PACIFIC OCEAN	VOLCANIC ROCK	ANDESITE, BASALTIC	2	Arc	WHOLE ROCK	0.84	5034.53		232	20.2	61.2	1.43	5.73	14.7	10.1	2.49	0.92	2.89	2.89	1.79	1.7	0.27	1.43	0.37
2014	[20107] ISHIZUKA O. (2014)	samp. R05	IZU-BONIN ARC / IZU ARC / IZU-TOBU / IZU-TOBU / PACIFIC OCEAN	VOLCANIC ROCK	ANDESITE, BASALTIC	2	Arc	WHOLE ROCK	0.84	5034.53		252	19.7	61.4	1.49	5.53	14.2	10.3	2.68	0.94	3.02	3.12	1.89	1.83	0.29	1.5	0.39
2014	[20107] ISHIZUKA O. (2014)	samp. R06	IZU-BONIN ARC / IZU ARC / IZU-TOBU / IZU-TOBU / PACIFIC OCEAN	VOLCANIC ROCK	ANDESITE, BASALTIC	2	Arc	WHOLE ROCK	0.94	5633.88		253	20.9	76.7	1.29	5.08	14	9.84	2.65	0.98	3.05	3.19	1.92	1.83	0.28	1.71	0.35
2014	[20107] ISHIZUKA O. (2014)	samp. R15	IZU-BONIN ARC / IZU ARC / IZU-OSHIMA / OSHIMA / PACIFIC OCEAN	VOLCANIC ROCK	ANDESITE, BASALTIC	2	Arc	WHOLE ROCK	1.07	6413.03		512	21.7	40.3	0.54	2.22	6.59	5.62	2.02	0.77	2.71	3.22	2.18	2.19	0.34	1.2	0.24
2014	[20107] ISHIZUKA O. (2014)	samp. R08	IZU-BONIN ARC / IZU ARC / IZU-OSHIMA / OSHIMA / PACIFIC OCEAN	VOLCANIC ROCK	ANDESITE, BASALTIC	2	Arc	WHOLE ROCK	1.1	6592.84		529	22.2	45.4	0.52	2.3	6.93	5.55	1.88	0.69	2.52	3.16	2.09	2.1	0.3	1.18	0.22
2014	[20107] ISHIZUKA O. (2014)	samp. 2	IZU-BONIN ARC / IZU ARC / IZU-OSHIMA / OSHIMA / DREDGE 22 / PACIFIC OCEAN	VOLCANIC ROCK	ANDESITE, BASALTIC	2	Arc	WHOLE ROCK	1.1	6592.84		543	22.6	44.2	0.52	2.33	6.76	5.84	2	0.72	2.62	3.42	2.26	2.17	0.34	1.24	0.22
2014	[20107] ISHIZUKA O. (2014)	samp. R05	IZU-BONIN ARC / IZU ARC / IZU-OSHIMA / OSHIMA / PACIFIC OCEAN	VOLCANIC ROCK	ANDESITE, BASALTIC	2	Arc	WHOLE ROCK	1.1	6592.84		488	22.4	46.4	0.56	2.39	7.1	6.16	2.24	0.8	3.02	3.6	2.37	2.34	0.37	1.39	0.23
2014	[20107] ISHIZUKA O. (2014)	samp. 1	IZU-BONIN ARC / IZU ARC / IZU-OSHIMA / OSHIMA / DREDGE 22 / PACIFIC OCEAN	VOLCANIC ROCK	ANDESITE, BASALTIC	2	Arc	WHOLE ROCK	1.11	6652.77		547	22.3	45	0.5	2.33	6.77	5.71	1.89	0.73	2.57	3.29	2.15	2.13	0.33	1.17	0.21
2014	[20107] ISHIZUKA O. (2014)	samp. 6	IZU-BONIN ARC / IZU ARC / IZU-OSHIMA / OSHIMA / DREDGE 22 / PACIFIC OCEAN	VOLCANIC ROCK	ANDESITE, BASALTIC	2	Arc	WHOLE ROCK	1.11	6652.77		556	21.3	44	0.43	2.25	6.81	5.53	1.93	0.7	2.58	3.36	2.18	2.18	0.35	1.17	0.21
2014	[20107] ISHIZUKA O. (2014)	samp. R04	IZU-BONIN ARC / IZU ARC / IZU-OSHIMA / OSHIMA / PACIFIC OCEAN	VOLCANIC ROCK	ANDESITE, BASALTIC	2	Arc	WHOLE ROCK	1.11	6652.77		524	23.1	47.4	0.53	2.43	7.32	5.93	1.92	0.75	2.63	3.37	2.19	2.25	0.33	1.21	0.23
2014	[20107] ISHIZUKA O. (2014)	samp. R07	IZU-BONIN ARC / IZU ARC / IZU-OSHIMA / OSHIMA / PACIFIC OCEAN	VOLCANIC ROCK	ANDESITE, BASALTIC	2	Arc	WHOLE ROCK	1.11	6652.77		512	22.4	43.7	0.53	2.37	6.95	5.96	2.28	0.82	2.9	3.43	2.4	2.3	0.36	1.28	0.23
2014	[20107] ISHIZUKA O. (2014)	samp. R06	IZU-BONIN ARC / IZU ARC / IZU-OSHIMA / OSHIMA / PACIFIC OCEAN	VOLCANIC ROCK	ANDESITE, BASALTIC	2	Arc	WHOLE ROCK	1.11	6652.77		538	23.3	46.1	0.54	2.46	7.2	6.12	2.12	0.82	2.87	3.48	2.3	2.31	0.36	1.33	0.22
2014	[20107] ISHIZUKA O. (2014)	samp. R02	IZU-BONIN ARC / IZU ARC / IZU-OSHIMA / OSHIMA / PACIFIC OCEAN	VOLCANIC ROCK	ANDESITE, BASALTIC	2	Arc	WHOLE ROCK	1.11	6652.77		546	23.1	45.2	0.57	2.48	7.31	6.09	2.06	0.82	2.84	3.59	2.36	2.32	0.37	1.33	0.23
2014	[20107] ISHIZUKA O. (2014)	samp. R01	IZU-BONIN ARC / IZU ARC / IZU-OSHIMA / OSHIMA / PACIFIC OCEAN	VOLCANIC ROCK	ANDESITE, BASALTIC	2	Arc	WHOLE ROCK	1.12	6712.71		524	23.8	47.8	0.5	2.46	7.23	6.06	1.95	0.78	2.85	3.35	2.33	2.2	0.35	1.3	0.21
2014	[20107] ISHIZUKA O. (2014)	samp. 1	IZU-BONIN ARC / IZU ARC / IZU-OSHIMA / OSHIMA / DREDGE 21 / PACIFIC OCEAN	VOLCANIC ROCK	ANDESITE, BASALTIC	2	Arc	WHOLE ROCK	1.12	6712.71		546	23.9	47.4	0.55	2.4	7.09	6.12	2.07	0.71	2.79	3.48	2.36	2.24	0.35	1.3	0.24
2014	[20107] ISHIZUKA O. (2014)	samp. R06	IZU-BONIN ARC / IZU ARC / IZU-OSHIMA / OSHIMA / PACIFIC OCEAN	VOLCANIC ROCK	ANDESITE, BASALTIC	2	Arc	WHOLE ROCK	1.12	6712.71		567	21.5	40.8	0.46	2.11	6.4	5.86	2.06	0.76	2.9	3.49	2.35	2.27	0.36	1.28	0.22
2014	[20107] ISHIZUKA O. (2014)	samp. R08	IZU-BONIN ARC / IZU ARC / IZU-OSHIMA / OSHIMA / PACIFIC OCEAN	VOLCANIC ROCK	ANDESITE, BASALTIC	2	Arc	WHOLE ROCK	1.12	6712.71		596	23.9	40.1	0.46	2.11	6.05	5.58	2.06	0.83	2.83	3.62	2.41	2.27	0.37	1.27	0.22
2014	[20107] ISHIZUKA O. (2014)	samp. R07	IZU-BONIN ARC / IZU ARC / IZU-OSHIMA / OSHIMA / PACIFIC OCEAN	VOLCANIC ROCK	ANDESITE, BASALTIC	2	Arc	WHOLE ROCK	1.12	6712.71		548	22.1	39.9	0.43	2.23	6.22	5.68	2.02	0.76	2.93	3.54	2.32	2.33	0.35	1.26	0.22
2014	[20107] ISHIZUKA O. (2014)	samp. R03	IZU-BONIN ARC / IZU ARC / IZU-OSHIMA / OSHIMA / PACIFIC OCEAN	VOLCANIC ROCK	ANDESITE, BASALTIC	2	Arc	WHOLE ROCK	1.12	6712.71		538	22.7	45.4	0.53	2.42	7.11	6.15	2.11	0.86	3.03	3.6	2.41	2.35	0.37	1.3	0.22
2014	[20107] ISHIZUKA O. (2014)	samp. 2	IZU-BONIN ARC / IZU ARC / IZU-OSHIMA / OSHIMA / DREDGE 21 / PACIFIC OCEAN	VOLCANIC ROCK	ANDESITE, BASALTIC	2	Arc	WHOLE ROCK	1.13	6772.64		524	23.5	46.5	0.49	2.42	7.08	5.98	1.97	0.69	2.58	3.36	2.25	2.24	0.34	1.23	0.22
2014	[20107] ISHIZUKA O. (2014)	samp. 3	IZU-BONIN ARC / IZU ARC / IZU-OSHIMA / OSHIMA / DREDGE 21 / PACIFIC OCEAN	VOLCANIC ROCK	ANDESITE, BASALTIC	2	Arc	WHOLE ROCK	1.13	6772.64		536	24.1	48.9	0.53	2.47	7.29	6.27	2.09	0.7	2.69	3.46	2.34	2.25	0.35	1.29	0.23
2014	[20107] ISHIZUKA O. (2014)	samp. R09	IZU-BONIN ARC / IZU ARC / IZU-OSHIMA / OSHIMA / PACIFIC OCEAN	VOLCANIC ROCK	ANDESITE, BASALTIC	2	Arc	WHOLE ROCK	1.14	6832.58		585	22.9	40.8	0.42	2.24	6.59	5.8	2	0.78	2.85	3.48	2.23	2.28	0.35	1.21	0.2
2014	[20107] ISHIZUKA O. (2014)	samp. 6	IZU-BONIN ARC / IZU ARC / IZU-OSHIMA / OSHIMA / DREDGE 21 / PACIFIC OCEAN	VOLCANIC ROCK	ANDESITE, BASALTIC	2	Arc	WHOLE ROCK	1.14	6832.58		513	23.6	47.4	0.48	2.58	7.55	6.32	2.27	0.93	3.14	3.74	2.44	2.48	0.39	1.3	0.23
2014	[20107] ISHIZUKA O. (2014)	samp. R12	IZU-BONIN ARC / IZU ARC / IZU-OSHIMA / OSHIMA / PACIFIC OCEAN	VOLCANIC ROCK	ANDESITE, BASALTIC	2	Arc	WHOLE ROCK	1.16	6952.45		577	23.5	45	0.45	2.1	6.29	5.86	2.05	0.84	2.92	3.66	2.47	2.43	0.38	1.31	0.21
2014	[20107] ISHIZUKA O. (2014)	samp. R05-2	IZU-BONIN ARC / IZU ARC / IZU-OSHIMA / OSHIMA / PACIFIC OCEAN	VOLCANIC ROCK	ANDESITE, BASALTIC	2	Arc	WHOLE ROCK	1.17	7012.38		602	25	45.6	0.54	2.38	6.99	5.91	2.08	0.78	2.9	3.53	2.36	2.34	0.36	1.29	0.29
2014	[20107] ISHIZUKA O. (2014)	samp. R01	IZU-BONIN ARC / IZU ARC / IZU-OSHIMA / OSHIMA / PACIFIC OCEAN	VOLCANIC ROCK	ANDESITE, BASALTIC	2	Arc	WHOLE ROCK	1.17	7012.38		573	23.5	43.6	0.43	2.12	6.46	5.71	2.09	0.79	2.94	3.7	2.43	2.37	0.37	1.25	0.22
2014	[20107] ISHIZUKA O. (2014)	samp. R06	IZU-BONIN ARC / IZU ARC / IZU-OSHIMA / OSHIMA / PACIFIC OCEAN	VOLCANIC ROCK	ANDESITE, BASALTIC	2	Arc	WHOLE ROCK	1.17	7012.38		588	24.7	45.7	0.57	2.33	7.01	6.13	2.27	0.81	3.06	3.91	2.58	2.4	0.39	1.41	0.31
2014	[20107] ISHIZUKA O. (2014)	samp. R13	IZU-BONIN ARC / IZU ARC / IZU-OSHIMA / OSHIMA / PACIFIC OCEAN	VOLCANIC ROCK	ANDESITE, BASALTIC	2	Arc	WHOLE ROCK	1.17	7012.38		625	25.5	45.5	0.45	2.26	6.62	5.77	2.07	0.81	3.06	3.58	2.45	2.42	0.36	1.24	0.2
2014	[20107] ISHIZUKA O. (2014)	samp. 1	IZU-BONIN ARC / IZU ARC / IZU-OSHIMA / OSHIMA / DREDGE 12 / PACIFIC OCEAN	VOLCANIC ROCK	ANDESITE, BASALTIC	2	Arc	WHOLE ROCK	1.18	7072.32		583	24.2	44	0.44	2.08	6.24	5.71	2	0.7	2.64	3.66	2.35	2.36	0.37	1.19	0.22
2014	[20107] ISHIZUKA O. (2014)	samp. 11	IZU-BONIN ARC / IZU ARC / IZU-OSHIMA / OSHIMA / DREDGE 12 / PACIFIC OCEAN	VOLCANIC ROCK	ANDESITE, BASALTIC	2	Arc	WHOLE ROCK	1.18	7072.32		608	24	42.6	0.44	2.06	6.14	5.81	2.03	0.74	2.76	3.66	2.31	2.37	0.37	1.27	0.23
2014	[20107] ISHIZUKA O. (2014)	samp. R04	IZU-BONIN ARC / IZU ARC / IZU-OSHIMA / OSHIMA / PACIFIC OCEAN	VOLCANIC ROCK	ANDESITE, BASALTIC	2	Arc	WHOLE ROCK	1.18	7072.32		592	23.9	45	0.51	2.3	7.18	6.22	2.25	0.81	2.87	3.72	2.47	2.42	0.38	1.36	0.3
2014	[20107] ISHIZUKA O. (2014)	samp. R10	IZU-BONIN ARC / IZU ARC / IZU-OSHIMA / OSHIMA / PACIFIC OCEAN	VOLCANIC ROCK	ANDESITE, BASALTIC	2	Arc	WHOLE ROCK	1.18	7072.32		579	24.4	43.1	0.47	2.24	6.69	5.97	2.12	0.85	2.91	3.71	2.45	2.44	0.37	1.3	0.23
2014	[20107] ISHIZUKA O. (2014)	samp. R08	IZU-BONIN ARC / IZU ARC / IZU-OSHIMA / OSHIMA / PACIFIC OCEAN	VOLCANIC ROCK	ANDESITE, BASALTIC	2	Arc	WHOLE ROCK	1.18	7072.32		636	24.7	44.3	0.43	2.07	6.05	5.71	2.08	0.81	2.9	3.79	2.53	2.45	0.39	1.31	0.22
2014	[20107] ISHIZUKA O. (2014)	samp. R09	IZU-BONIN ARC / IZU ARC / IZU-OSHIMA / OSHIMA / PACIFIC OCEAN	VOLCANIC ROCK	ANDESITE, BASALTIC	2	Arc	WHOLE ROCK	1.18	7072.32		604	24	44.2	0.5	2.24	6.83	6.23	2.21	0.84	2.99	3.78	2.54	2.47	0.38	1.36	0.24
2014	[20107] ISHIZUKA O. (2014)	samp. 4	IZU-BONIN ARC / IZU ARC / IZU-OSHIMA / OSHIMA / DREDGE 12 / PACIFIC OCEAN	VOLCANIC ROCK	ANDESITE, BASALTIC	2	Arc	WHOLE ROCK	1.18	7072.32		589	24.9	44.5	0.49	2.26	6.86	6.21	2.19	0.77	3.01	3.9	2.48	2.5	0.38	1.37	0.23
2014	[20107] ISHIZUKA O. (2014)	samp. R02	IZU-BONIN ARC / IZU ARC / IZU-OSHIMA / OSHIMA / PACIFIC OCEAN	VOLCANIC ROCK	ANDESITE, BASALTIC	2	Arc	WHOLE ROCK	1.18	7072.32		581	25.6	44.5	0.48	2.23	6.62	6.17	2.2	0.85	3.06	3.87	2.59	2.55	0.4	1.38	0.22
2014	[20107] ISHIZUKA O. (2014)	samp. R05-1	IZU-BONIN ARC / IZU ARC / IZU-OSHIMA / OSHIMA / PACIFIC OCEAN	VOLCANIC ROCK	ANDESITE, BASALTIC	2	Arc	WHOLE ROCK	1.19	7132.25		587	24	43	0.49	2.26	6.6	5.98	2.2	0.84	2.98	3.66	2.45	2.41	0.38	1.35	0.24
2014	[20107] ISHIZUKA O. (2014)	samp. R02	IZU-BONIN ARC / IZU ARC / IZU-OSHIMA / OSHIMA / PACIFIC OCEAN	VOLCANIC ROCK	ANDESITE, BASALTIC	2	Arc	WHOLE ROCK	1.19	7132.25		596	25.2	45	0.47	2.29	6.92	6.22	2.19	0.81	2.96	3.75	2.49	2.41	0.37	1.27	0.24
2014	[20107] ISHIZUKA O. (2014)	samp. R05	IZU-BONIN ARC / IZU ARC / IZU-OSHIMA / OSHIMA / PACIFIC OCEAN	VOLCANIC ROCK	ANDESITE, BASALTIC	2	Arc	WHOLE ROCK	1.19	7132.25		612	25.8	46.2	0.57	2.32	7.09	6.29	2.18	0.78	3.07	3.8	2.49	2.43	0.37	1.37	0.31
2014	[20107] ISHIZUKA O. (2014)	samp. 5	IZU-BONIN ARC / IZU ARC / IZU-OSHIMA / OSHIMA / DREDGE 12 / PACIFIC OCEAN	VOLCANIC ROCK	ANDESITE, BASALTIC	2	Arc	WHOLE ROCK	1.19	7132.25		582	24.5	43.6	0.46	2.24	6.74	6.09	2.19	0.84	2.91	3.82	2.48	2.45	0.38	1.32	0.23
2014	[20107] ISHIZUKA O. (2014)	samp. R03	IZU-BONIN ARC / IZU ARC / IZU-OSHIMA / OSHIMA / PACIFIC OCEAN	VOLCANIC ROCK	ANDESITE, BASALTIC	2	Arc	WHOLE ROCK	1.19	7132.25		550	24.2	44.4	0.42	2.3	6.83	6.05	2.19	0.79	3.14	3.82	2.55	2.45	0.4	1.33	0.22
2014	[20107] ISHIZUKA O. (2014)	samp. R04	IZU-BONIN ARC / IZU ARC / IZU-OSHIMA / OSHIMA / PACIFIC OCEAN	VOLCANIC ROCK	ANDESITE, BASALTIC	2	Arc	WHOLE ROCK	1.19	7132.25		591	24.2	42.5	0.5	2.3	6.85	6.08	2.21	0.81	2.96	3.69	2.42	2.46	0.37	1.34	0.24
2014	[20107] ISHIZUKA O. (2014)	samp. 09022401	IZU-BONIN ARC / IZU ARC / IZU-OSHIMA / OSHIMA / PACIFIC OCEAN	VOLCANIC ROCK	ANDESITE, BASALTIC	2	Arc	WHOLE ROCK	1.19	7132.25		587.6	24.9	43.3	0.48	2.13	6.54	6.01	2.2	0.8	3.11	3.84	2.55	2.5	0.39	1.38	0.26
2014	[20107] ISHIZUKA O. (2014)	samp. R05	IZU-BONIN ARC / IZU ARC / IZU-OSHIMA / OSHIMA / PACIFIC OCEAN	VOLCANIC ROCK	ANDESITE, BASALTIC	2	Arc	WHOLE ROCK	1.19	7132.25		534	23.2	45	0.42	2.21	6.71	6.25	2.16	0.8	3.03	3.83	2.52	2.54	0.38	1.37	0.23
2014	[20107] ISHIZUKA O. (2014)	samp. R06	IZU-BONIN ARC / IZU ARC / IZU-OSHIMA / OSHIMA / PACIFIC OCEAN	VOLCANIC ROCK	ANDESITE, BASALTIC	2	Arc	WHOLE ROCK	1.19	7132.25		606	26.1	42.8	0.47	2.09	6.17	5.7	2.17	0.88	3.11	3.85	2.57	2.65	0.4	1.36	0.23
2014	[20107] ISHIZUKA O. (2014)	samp. R07	IZU-BONIN ARC / IZU ARC / IZU-OSHIMA / OSHIMA / PACIFIC OCEAN	VOLCANIC ROCK	ANDESITE, BASALTIC	2	Arc	WHOLE ROCK	1.2	7192.19		608	24.2	42.9	0.41	2.14	6.53	5.71	1.98	0.78	2.86	3.77	2.42	2.42	0.37	1.28	0.2
2014	[20107] ISHIZUKA O. (2014)	samp. R03	IZU-BONIN ARC / IZU ARC / IZU-OSHIMA / OSHIMA / PACIFIC OCEAN	VOLCANIC ROCK	ANDESITE, BASALTIC	2	Arc	WHOLE ROCK	1.2	7192.19		574	24.3	46.5	0.45	2.16	6.67	6.02	2.14	0.81	2.94	3.77	2.45	2.43	0.39	1.31	0.21
2014	[20107] ISHIZUKA O. (2014)	samp. R13	IZU-BONIN ARC / IZU ARC / IZU-OSHIMA / OSHIMA / PACIFIC OCEAN	VOLCANIC ROCK	ANDESITE, BASALTIC	2	Arc	WHOLE ROCK	1.2	7192.19		590	22.9	42.4	0.47	2.32	6.78	6.14	2.3	0.81	3.14	3.67	2.53	2.46	0.39	1.38	0.21
2014	[20107] ISHIZUKA O. (2014)	samp. 5	IZU-BONIN ARC / IZU ARC / IZU-OSHIMA / OSHIMA / DREDGE 17 / PACIFIC OCEAN	VOLCANIC ROCK	ANDESITE, BASALTIC	2	Arc	WHOLE ROCK	1.2	7192.19		558	24.7	44.7	0.43	2.32	7.01	6.25	2.19	0.76	2.84	3.8	2.45	2.46	0.39	1.31	0.23
2014	[20107] ISHIZUKA O. (2014)	samp. R05	IZU-BONIN ARC / IZU ARC / IZU-OSHIMA / OSHIMA / PACIFIC OCEAN	VOLCANIC ROCK	ANDESITE, BASALTIC	2	Arc	WHOLE ROCK	1.2	7192.19		586	23.1	44.2	0.44	2.18	6.65	5.97	2.11	0.79	2.99	3.7	2.45	2.47	0.4	1.31	0.21
2014	[20107] ISHIZUKA O. (2014)	samp. R03	IZU-BONIN ARC / IZU ARC / IZU-OSHIMA / OSHIMA / PACIFIC OCEAN	VOLCANIC ROCK	ANDESITE, BASALTIC	2	Arc	WHOLE ROCK	1.2	7192.19		633	23.9	43.1	0.41	2.18	6.58	6.04	2.04	0.77	2.72	3.62	2.45	2.48	0.37	1.26	0.21
2014	[20107] ISHIZUKA O. (2014)	samp. 09022506-1	IZU-BONIN ARC / IZU ARC / IZU-OSHIMA / OSHIMA / PACIFIC OCEAN	VOLCANIC ROCK	ANDESITE, BASALTIC	2	Arc	WHOLE ROCK	1.2	7192.19		629.1	24.9	44.6	0.45	2.21	6.58	6.16	2.28	0.8	3.24	3.86	2.54	2.51	0.38	1.38	0.23
2014	[20107] ISHIZUKA O. (2014)	samp. 09022503	IZU-BONIN ARC / IZU ARC / IZU-OSHIMA / OSHIMA / PACIFIC OCEAN	VOLCANIC ROCK	ANDESITE, BASALTIC	2	Arc	WHOLE ROCK	1.2	7192.19		599.6	25.1	44.8	0.45	2.21	6.72	6.19	2.25	0.82	3.25	3.87	2.57	2.51	0.39	1.38	0.22
2014	[20107] ISHIZUKA O. (2014)	samp. 09022403	IZU-BONIN ARC / IZU ARC / IZU-OSHIMA / OSHIMA / PACIFIC OCEAN	VOLCANIC ROCK	ANDESITE, BASALTIC	2	Arc	WHOLE ROCK	1.2	7192.19		550.5	25.7	47.3	0.51	2.3	6.91	6.31	2.26	0.84	3.14	3.9	2.62	2.52	0.41	1.41	0.27
2014	[20107] ISHIZUKA O. (2014)	samp. 1	IZU-BONIN ARC / IZU ARC / IZU-OSHIMA / OSHIMA / DREDGE 17 / PACIFIC OCEAN	VOLCANIC ROCK	ANDESITE, BASALTIC	2	Arc	WHOLE ROCK	1.2	7192.19		597	25.6	45.9	0.48	2.22	6.68	6.26	2.18	0.76	3	3.86	2.55	2.54	0.39	1.38	0.25
2014	[20107] ISHIZUKA O. (2014)	samp. 09022407	IZU-BONIN ARC / IZU ARC / IZU-OSHIMA / OSHIMA / PACIFIC OCEAN	VOLCANIC ROCK	ANDESITE, BASALTIC	2	Arc	WHOLE ROCK	1.2	7192.19		606.9	24.6	43.8	0.48	2.16	6.42	6.02	2.16	0.8	3.18	3.81	2.52	2.55	0.39	1.31	0.24
2014	[20107] ISHIZUKA O. (2014)	samp. R04	IZU-BONIN ARC / IZU ARC / IZU-OSHIMA / OSHIMA / PACIFIC OCEAN	VOLCANIC ROCK	ANDESITE, BASALTIC	2	Arc	WHOLE ROCK	1.2	7192.19		574	25	46.2	0.45	2.31	6.87	6.48	2.27	0.86	3.22	3.95	2.66	2.63	0.42	1.43	0.23
2014	[20107] ISHIZUKA O. (2014)	samp. R08	IZU-BONIN ARC / IZU ARC / IZU-OSHIMA / OSHIMA / PACIFIC OCEAN	VOLCANIC ROCK	ANDESITE, BASALTIC	2	Arc	WHOLE ROCK	1.2	7192.19		564	25.6	46.5	0.48	2.31	6.98	6.34	2.34	0.82	3.37	3.98	2.63	2.63	0.41	1.42	0.23
2014	[20107] ISHIZUKA O. (2014)	samp. 09022406	IZU-BONIN ARC / IZU ARC / IZU-OSHIMA / OSHIMA / PACIFIC OCEAN	VOLCANIC ROCK	ANDESITE, BASALTIC	2	Arc	WHOLE ROCK	1.21	7252.12		581.6	25.2	42.9	0.49	2.11	6.44	5.92	2.23	0.77	3.17	3.73	2.47	2.44	0.38	1.34	0.24
2014	[20107] ISHIZUKA O. (2014)	samp. 7	IZU-BONIN ARC / IZU ARC / IZU-OSHIMA / OSHIMA / DREDGE 6 / PACIFIC OCEAN	VOLCANIC ROCK	ANDESITE, BASALTIC	2	Arc	WHOLE ROCK	1.21	7252.12		650	25.1	44	0.46	2.36	6.95	6.22	2.24	0.77	3.05	3.94	2.6	2.44	0.37	1.38	0.25
2014	[20107] ISHIZUKA O. (2014)	samp. R02	IZU-BONIN ARC / IZU ARC / IZU-OSHIMA / OSHIMA / PACIFIC OCEAN	VOLCANIC ROCK	ANDESITE, BASALTIC	2	Arc	WHOLE ROCK	1.21	7252.12		611	26.1	45	0.45	2.09	6.5	5.85	2.17	0.81	3.02	3.78	2.6	2.46	0.4	1.34	0.22
2014	[20107] ISHIZUKA O. (2014)	samp. R04	IZU-BONIN ARC / IZU ARC / IZU-OSHIMA / OSHIMA / PACIFIC OCEAN	VOLCANIC ROCK	ANDESITE, BASALTIC	2	Arc	WHOLE ROCK	1.21	7252.12		610	23.8	44.2	0.42	2.19	6.67	5.98	2.12	0.81	2.89	3.95	2.44	2.46	0.39	1.32	0.21
2014	[20107] ISHIZUKA O. (2014)	samp. R07	IZU-BONIN ARC / IZU ARC / IZU-OSHIMA / OSHIMA / PACIFIC OCEAN	VOLCANIC ROCK	ANDESITE, BASALTIC	2	Arc	WHOLE ROCK	1.21	7252.12		545	24.5	44.7	0.43	2.27	6.63	6.14	2.2	0.83	3.11	3.84	2.49	2.49	0.38	1.37	0.23
2014	[20107] ISHIZUKA O. (2014)	samp. R11	IZU-BONIN ARC / IZU ARC / IZU-OSHIMA / OSHIMA / PACIFIC OCEAN	VOLCANIC ROCK	ANDESITE, BASALTIC	2	Arc	WHOLE ROCK	1.21	7252.12		627	25.1	46.2	0.49	2.32	7.03	6.11	2.3	0.82	3.03	3.9	2.54	2.49	0.4	1.39	0.24
2014	[20107] ISHIZUKA O. (2014)	samp. 09022404	IZU-BONIN ARC / IZU ARC / IZU-OSHIMA / OSHIMA / PACIFIC OCEAN	VOLCANIC ROCK	ANDESITE, BASALTIC	2	Arc	WHOLE ROCK	1.21	7252.12		534.4	25.4	45.7	0.51	2.19	6.63	6.01	2.19	0.79	3.09	3.82	2.54	2.51	0.39	1.33	0.28
2014	[20107] ISHIZUKA O. (2014)	samp. 2	IZU-BONIN ARC / IZU ARC / IZU-OSHIMA / OSHIMA / DREDGE 17 / PACIFIC OCEAN	VOLCANIC ROCK	ANDESITE, BASALTIC	2	Arc	WHOLE ROCK	1.21	7252.12		549	25.2	45.1	0.46	2.21	6.8	6.13	2.18	0.78	2.99	3.85	2.52	2.51	0.39	1.34	0.23
2014	[20107] ISHIZUKA O. (2014)	samp. 09022505	IZU-BONIN ARC / IZU ARC / IZU-OSHIMA / OSHIMA / PACIFIC OCEAN	VOLCANIC ROCK	ANDESITE, BASALTIC	2	Arc	WHOLE ROCK	1.21	7252.12		635.6	25.4	45.4	0.42	2.22	6.68	6.2	2.18	0.8	3.23	3.94	2.59	2.51	0.4	1.37	0.23
2014	[20107] ISHIZUKA O. (2014)	samp. R15	IZU-BONIN ARC / IZU ARC / IZU-OSHIMA / OSHIMA / PACIFIC OCEAN	VOLCANIC ROCK	ANDESITE, BASALTIC	2	Arc	WHOLE ROCK	1.21	7252.12		617	23.9	45.1	0.45	2.32	6.93	6.08	2.1	0.78	2.91	3.81	2.46	2.51	0.39	1.36	0.22
2014	[20107] ISHIZUKA O. (2014)	samp. R06	IZU-BONIN ARC / IZU ARC / IZU-OSHIMA / OSHIMA / PACIFIC OCEAN	VOLCANIC ROCK	ANDESITE, BASALTIC	2	Arc	WHOLE ROCK	1.21	7252.12		557	23.8	46	0.45	2.29	6.78	6.22	2.23	0.9	3.19	3.92	2.59	2.54	0.4	1.41	0.23
2014	[20107] ISHIZUKA O. (2014)	samp. 6	IZU-BONIN ARC / IZU ARC / IZU-OSHIMA / OSHIMA / DREDGE 6 / PACIFIC OCEAN	VOLCANIC ROCK	ANDESITE, BASALTIC	2	Arc	WHOLE ROCK	1.21	7252.12		638	24.8	43.5	0.5	2.34	6.8	6.24	2.23	0.76	3.1	3.91	2.5	2.54	0.4	1.39	0.25
2014	[20107] ISHIZUKA O. (2014)	samp. 09022506-2	IZU-BONIN ARC / IZU ARC / IZU-OSHIMA / OSHIMA / PACIFIC OCEAN	VOLCANIC ROCK	ANDESITE, BASALTIC	2	Arc	WHOLE ROCK	1.21	7252.12		642.7	25.8	44.8	0.42	2.18	6.61	6.26	2.23	0.82	3.34	3.99	2.61	2.56	0.39	1.42	0.23
2014	[20107] ISHIZUKA O. (2014)	samp. 09022504	IZU-BONIN ARC / IZU ARC / IZU-OSHIMA / OSHIMA / PACIFIC OCEAN	VOLCANIC ROCK	ANDESITE, BASALTIC	2	Arc	WHOLE ROCK	1.21	7252.12		614	25.2	44.7	0.41	2.19	6.61	6.23	2.23	0.77	3.15	3.84	2.58	2.56	0.38	1.4	0.226
2014	[20107] ISHIZUKA O. (2014)	samp. R01	IZU-BONIN ARC / IZU ARC / IZU-OSHIMA / OSHIMA / PACIFIC OCEAN	VOLCANIC ROCK	ANDESITE, BASALTIC	2	Arc	WHOLE ROCK	1.21	7252.12		590	23.7	43.7	0.44	2.23	6.87	6.08	2.16	0.82	3.02	3.93	2.61	2.57	0.41	1.38	0.2
2014	[20107] ISHIZUKA O. (2014)	samp. R12	IZU-BONIN ARC / IZU ARC / IZU-OSHIMA / OSHIMA / PACIFIC OCEAN	VOLCANIC ROCK	ANDESITE, BASALTIC	2	Arc	WHOLE ROCK	1.21	7252.12		610	24.3	45.8	0.48	2.38	7.12	6.27	2.39	0.85	3.2	3.86	2.64	2.61	0.38	1.44	0.23
2014	[20107] ISHIZUKA O. (2014)	samp. R09	IZU-BONIN ARC / IZU ARC / IZU-OSHIMA / OSHIMA / PACIFIC OCEAN	VOLCANIC ROCK	ANDESITE, BASALTIC	2	Arc	WHOLE ROCK	1.21	7252.12		551	24.2	46.2	0.47	2.31	7.04	6.27	2.3	0.85	3.34	4.04	2.74	2.69	0.41	1.46	0.25
2014	[20107] ISHIZUKA O. (2014)	samp. 9	IZU-BONIN ARC / IZU ARC / IZU-OSHIMA / OSHIMA / DREDGE 6 / PACIFIC OCEAN	VOLCANIC ROCK	ANDESITE, BASALTIC	2	Arc	WHOLE ROCK	1.22	7312.06		640	25.4	47	0.49	2.31	6.65	6.35	2.09	0.82	2.97	3.63	2.38	2.32	0.36	1.31	0.25
2014	[20107] ISHIZUKA O. (2014)	samp. R07	IZU-BONIN ARC / IZU ARC / IZU-OSHIMA / OSHIMA / PACIFIC OCEAN	VOLCANIC ROCK	ANDESITE, BASALTIC	2	Arc	WHOLE ROCK	1.22	7312.06		606	23.8	43.5	0.44	2.2	6.47	5.96	2.18	0.85	3.17	4.09	2.65	2.46	0.41	1.43	0.21
2014	[20107] ISHIZUKA O. (2014)	samp. 10012103	IZU-BONIN ARC / IZU ARC / IZU-OSHIMA / OSHIMA / PACIFIC OCEAN	VOLCANIC ROCK	ANDESITE, BASALTIC	2	Arc	WHOLE ROCK	1.22	7312.06		579.4	24	44	0.45	2.31	6.91	6.13	2.37	0.82	3.02	3.99	2.66	2.55	0.39	1.41	0.22
2014	[20107] ISHIZUKA O. (2014)	samp. R08	IZU-BONIN ARC / IZU ARC / IZU-OSHIMA / OSHIMA / PACIFIC OCEAN	VOLCANIC ROCK	ANDESITE, BASALTIC	2	Arc	WHOLE ROCK	1.22	7312.06		615	24.3	44.9	0.49	2.24	6.96	6.34	2.28	0.86	3.07	3.98	2.67	2.62	0.4	1.41	0.24
2014	[20107] ISHIZUKA O. (2014)	samp. R12	IZU-BONIN ARC / IZU ARC / IZU-OSHIMA / OSHIMA / PACIFIC OCEAN	VOLCANIC ROCK	ANDESITE, BASALTIC	2	Arc	WHOLE ROCK	1.22	7312.06		560	24.5	45.3	0.46	2.36	6.82	6.32	2.32	0.85	3.31	3.9	2.69	2.63	0.41	1.42	0.25
2014	[20107] ISHIZUKA O. (2014)	samp. 10012102SP1	IZU-BONIN ARC / IZU ARC / IZU-OSHIMA / OSHIMA / PACIFIC OCEAN	VOLCANIC ROCK	ANDESITE, BASALTIC	2	Arc	WHOLE ROCK	1.22	7312.06		612.6	25	43.4	0.46	2.3	6.78	6.25	2.31	0.84	3.29	4.05	2.63	2.64	0.4	1.39	0.22
2014	[20107] ISHIZUKA O. (2014)	samp. 8	IZU-BONIN ARC / IZU ARC / IZU-OSHIMA / OSHIMA / DREDGE 6 / PACIFIC OCEAN	VOLCANIC ROCK	ANDESITE, BASALTIC	2	Arc	WHOLE ROCK	1.23	7371.99		600	24.7	45.2	0.52	2.38	7.04	6.36	2.24	0.81	3.01	3.83	2.55	2.47	0.38	1.33	0.26
2014	[20107] ISHIZUKA O. (2014)	samp. R11	IZU-BONIN ARC / IZU ARC / IZU-OSHIMA / OSHIMA / PACIFIC OCEAN	VOLCANIC ROCK	ANDESITE, BASALTIC	2	Arc	WHOLE ROCK	1.23	7371.99		609	26.3	46.3	0.46	2.34	7.04	6.09	2.21	0.82	3	3.92	2.52	2.5	0.39	1.32	0.22
2014	[20107] ISHIZUKA O. (2014)	samp. R13	IZU-BONIN ARC / IZU ARC / IZU-OSHIMA / OSHIMA / PACIFIC OCEAN	VOLCANIC ROCK	ANDESITE, BASALTIC	2	Arc	WHOLE ROCK	1.23	7371.99		590	26.8	45.7	0.45	2.24	6.88	6.18	2.2	0.84	3.1	3.85	2.59	2.52	0.38	1.38	0.22
2014	[20107] ISHIZUKA O. (2014)	samp. 09022419	IZU-BONIN ARC / IZU ARC / IZU-OSHIMA / OSHIMA / PACIFIC OCEAN	VOLCANIC ROCK	ANDESITE, BASALTIC	2	Arc	WHOLE ROCK	1.23	7371.99		574.2	25	45.2	0.46	2.17	6.56	6.07	2.24	0.81	3.04	3.86	2.49	2.55	0.39	1.4	0.25
2014	[20107] ISHIZUKA O. (2014)	samp. 10012201SP1	IZU-BONIN ARC / IZU ARC / IZU-OSHIMA / OSHIMA / PACIFIC OCEAN	VOLCANIC ROCK	ANDESITE, BASALTIC	2	Arc	WHOLE ROCK	1.23	7371.99		604.1	24.6	44.9	0.45	2.22	6.63	6.09	2.2	0.8	3	3.97	2.67	2.55	0.41	1.44	0.24
2014	[20107] ISHIZUKA O. (2014)	samp. R02	IZU-BONIN ARC / IZU ARC / IZU-OSHIMA / OSHIMA / PACIFIC OCEAN	VOLCANIC ROCK	ANDESITE, BASALTIC	2	Arc	WHOLE ROCK	1.23	7371.99		636	25.6	43.9	0.43	2.24	6.77	6.17	2.18	0.82	3.03	3.83	2.52	2.56	0.4	1.31	0.21
2014	[20107] ISHIZUKA O. (2014)	samp. R01	IZU-BONIN ARC / IZU ARC / IZU-OSHIMA / OSHIMA / PACIFIC OCEAN	VOLCANIC ROCK	ANDESITE, BASALTIC	2	Arc	WHOLE ROCK	1.23	7371.99		611	26.3	46.6	0.54	2.32	7.18	6.44	2.2	0.84	3.18	4	2.62	2.6	0.39	1.34	0.3
2014	[20107] ISHIZUKA O. (2014)	samp. R06	IZU-BONIN ARC / IZU ARC / IZU-OSHIMA / OSHIMA / PACIFIC OCEAN	VOLCANIC ROCK	ANDESITE, BASALTIC	2	Arc	WHOLE ROCK	1.23	7371.99		620	24.5	47	0.52	2.25	6.78	6.41	2.26	0.83	3.24	3.84	2.65	2.61	0.4	1.41	0.23
2014	[20107] ISHIZUKA O. (2014)	samp. 10012102SP2	IZU-BONIN ARC / IZU ARC / IZU-OSHIMA / OSHIMA / PACIFIC OCEAN	VOLCANIC ROCK	ANDESITE, BASALTIC	2	Arc	WHOLE ROCK	1.23	7371.99		602.5	25	44.5	0.48	2.33	6.86	6.22	2.29	0.85	3.19	4.04	2.63	2.61	0.41	1.4	0.23
2014	[20107] ISHIZUKA O. (2014)	samp. R04	IZU-BONIN ARC / IZU ARC / IZU-OSHIMA / OSHIMA / PACIFIC OCEAN	VOLCANIC ROCK	ANDESITE, BASALTIC	2	Arc	WHOLE ROCK	1.24	7431.93		632	25	45.4	0.52	2.29	6.9	6.38	2.37	0.86	3.25	3.97	2.74	2.59	0.41	1.44	0.23
2014	[20107] ISHIZUKA O. (2014)	samp. R07	IZU-BONIN ARC / IZU ARC / IZU-OSHIMA / OSHIMA / PACIFIC OCEAN	VOLCANIC ROCK	ANDESITE, BASALTIC	2	Arc	WHOLE ROCK	1.24	7431.93		635	25.2	46.7	0.52	2.34	6.92	6.24	2.25	0.83	3.23	3.95	2.6	2.62	0.4	1.41	0.24
2014	[20107] ISHIZUKA O. (2014)	samp. R05	IZU-BONIN ARC / IZU ARC / IZU-OSHIMA / OSHIMA / PACIFIC OCEAN	VOLCANIC ROCK	ANDESITE, BASALTIC	2	Arc	WHOLE ROCK	1.25	7491.86		645	26.5	45.2	0.47	2.24	6.67	6.18	2.29	0.86	3.19	3.98	2.67	2.64	0.42	1.44	0.23
2014	[20107] ISHIZUKA O. (2014)	samp. R03	IZU-BONIN ARC / IZU ARC / IZU-OSHIMA / OSHIMA / PACIFIC OCEAN	VOLCANIC ROCK	ANDESITE, BASALTIC	2	Arc	WHOLE ROCK	1.25	7491.86		644	25.8	46.1	0.54	2.28	6.96	6.29	2.4	0.86	3.24	4.08	2.67	2.66	0.42	1.45	0.24
2014	[20107] ISHIZUKA O. (2014)	samp. R09	IZU-BONIN ARC / IZU ARC / IZU-OSHIMA / OSHIMA / PACIFIC OCEAN	VOLCANIC ROCK	ANDESITE, BASALTIC	2	Arc	WHOLE ROCK	1.26	7551.8		653	25.7	46.4	0.45	2.24	6.86	6.05	2.26	0.83	3	4	2.5	2.55	0.39	1.35	0.2
2014	[20107] ISHIZUKA O. (2014)	samp. 09022501	IZU-BONIN ARC / IZU ARC / IZU-OSHIMA / OSHIMA / PACIFIC OCEAN	VOLCANIC ROCK	ANDESITE, BASALTIC	2	Arc	WHOLE ROCK	1.26	7551.8		657	26	46.4	0.47	2.31	6.79	6.43	2.25	0.84	3.38	4.13	2.68	2.64	0.42	1.41	0.24
2014	[20107] ISHIZUKA O. (2014)	samp. 09022502	IZU-BONIN ARC / IZU ARC / IZU-OSHIMA / OSHIMA / PACIFIC OCEAN	VOLCANIC ROCK	ANDESITE, BASALTIC	2	Arc	WHOLE ROCK	1.26	7551.8		624	26	46.3	0.46	2.31	6.8	6.39	2.29	0.85	3.33	3.97	2.65	2.68	0.4	1.4	0.24
2014	[20107] ISHIZUKA O. (2014)	samp. 10070101-1	IZU-BONIN ARC / IZU ARC / IZU-OSHIMA / OSHIMA / PACIFIC OCEAN	VOLCANIC ROCK	ANDESITE, BASALTIC	2	Arc	WHOLE ROCK	1.28	7671.67		606	25.1	48.4	0.44	2.32	6.85	6.33	2.32	0.84	3.21	4.09	2.69	2.7	0.41	1.44	0.23
2014	[20107] ISHIZUKA O. (2014)	samp. 10070101-2	IZU-BONIN ARC / IZU ARC / IZU-OSHIMA / OSHIMA / PACIFIC OCEAN	VOLCANIC ROCK	ANDESITE, BASALTIC	2	Arc	WHOLE ROCK	1.29	7731.6		606	25.7	47.9	0.44	2.34	6.81	6.23	2.24	0.85	3.2	4.01	2.69	2.62	0.41	1.43	0.23
1998	[4658] PEATE D. W. (1998)	samp. 80-1	IZU-BONIN ARC / IZU ARC / NISHINOSHIMA / NISHINOSHIMA / PACIFIC OCEAN	VOLCANIC ROCK	ANDESITE, BASALTIC	2	Arc	WHOLE ROCK			35	254	22.8	55.9	0.67	2.15	6.42	6.12	2.15	0.76	3.22	3.7	2.44	2.32	0.36	1.77	0.16
1998	[4658] PEATE D. W. (1998)	samp. 79-6	IZU-BONIN ARC / IZU ARC / NISHINOSHIMA / NISHINOSHIMA / PACIFIC OCEAN	VOLCANIC ROCK	ANDESITE, BASALTIC	2	Arc	WHOLE ROCK			29	224	26.2	72.4	0.99	3.23	8.39	7.59	2.32	0.87	3.24	3.9	2.41	2.76	0.47	2.14	0.26
1998	[4658] PEATE D. W. (1998)	samp. 79-6	IZU-BONIN ARC / IZU ARC / NISHINOSHIMA / NISHINOSHIMA / PACIFIC OCEAN	VOLCANIC ROCK	ANDESITE, BASALTIC	2	Arc	WHOLE ROCK			29	224	28.1	76.3	0.95	3.4	8.87	7.89	2.28	0.93	3.24	3.9	2.45	2.89	0.51	2.08	0.26
2003	[6564] YOKOYAMA TETSUYA(2003) [GeoReM [510] ]	samp. 2703	IZU-BONIN ARC / IZU ARC / MIYAKEJIMA/MIYAKE-ZIMA / MIYAKEJIMA/MIYAKE-ZIMA / PACIFIC OCEAN	VOLCANIC ROCK	ANDESITE, BASALTIC	2	Arc	WHOLE ROCK	1.1	6592.84			30.5	54.4	0.47	3.06	9	8.7	2.86	1.05	3.72	4.56	2.85	3.03	0.44	1.72	0.289
2003	[6564] YOKOYAMA TETSUYA(2003) [GeoReM [510] ]	samp. 0101	IZU-BONIN ARC / IZU ARC / MIYAKEJIMA/MIYAKE-ZIMA / MIYAKEJIMA/MIYAKE-ZIMA / PACIFIC OCEAN	VOLCANIC ROCK	ANDESITE, BASALTIC	2	Arc	WHOLE ROCK	1.17	7012.38			35.8	73.4	0.59	3.91	11.4	10.6	3.52	1.2	4.49	5.62	3.34	3.53	0.53	2.22	0.396
2003	[6564] YOKOYAMA TETSUYA(2003) [GeoReM [510] ]	samp. 0301	IZU-BONIN ARC / IZU ARC / MIYAKEJIMA/MIYAKE-ZIMA / MIYAKEJIMA/MIYAKE-ZIMA / PACIFIC OCEAN	VOLCANIC ROCK	ANDESITE, BASALTIC	2	Arc	WHOLE ROCK	1.18	7072.32			32	58.3	0.46	3.24	9.4	8.91	3	1.12	3.92	4.93	2.93	3.17	0.46	1.75	0.302
2003	[6564] YOKOYAMA TETSUYA(2003) [GeoReM [510] ]	samp. 0309	IZU-BONIN ARC / IZU ARC / MIYAKEJIMA/MIYAKE-ZIMA / MIYAKEJIMA/MIYAKE-ZIMA / PACIFIC OCEAN	VOLCANIC ROCK	ANDESITE, BASALTIC	2	Arc	WHOLE ROCK	1.18	7072.32			31.8	60.2	0.5	3.25	9.7	8.88	3	1.08	3.98	4.99	3.02	3.22	0.47	1.89	0.316
2003	[6564] YOKOYAMA TETSUYA(2003) [GeoReM [510] ]	samp. 0104	IZU-BONIN ARC / IZU ARC / MIYAKEJIMA/MIYAKE-ZIMA / MIYAKEJIMA/MIYAKE-ZIMA / PACIFIC OCEAN	VOLCANIC ROCK	ANDESITE, BASALTIC	2	Arc	WHOLE ROCK	1.19	7132.25			37.9	73.9	0.59	4.12	11.8	11	3.61	1.24	4.58	5.67	3.44	3.79	0.53	2.31	0.412
2003	[6564] YOKOYAMA TETSUYA(2003) [GeoReM [510] ]	samp. 2702	IZU-BONIN ARC / IZU ARC / MIYAKEJIMA/MIYAKE-ZIMA / MIYAKEJIMA/MIYAKE-ZIMA / PACIFIC OCEAN	VOLCANIC ROCK	ANDESITE, BASALTIC	2	Arc	WHOLE ROCK	1.23	7371.99			41.2	81.6	0.68	4.32	12.7	11.7	3.89	1.32	5.01	6.18	3.74	4.05	0.59	2.41	0.441
2003	[6564] YOKOYAMA TETSUYA(2003) [GeoReM [510] ]	samp. 0113	IZU-BONIN ARC / IZU ARC / MIYAKEJIMA/MIYAKE-ZIMA / MIYAKEJIMA/MIYAKE-ZIMA / PACIFIC OCEAN	VOLCANIC ROCK	ANDESITE, BASALTIC	2	Arc	WHOLE ROCK	1.25	7491.86			35.8	64.7	0.56	3.66	10.8	10.1	3.36	1.24	4.52	5.59	3.36	3.61	0.53	2.01	0.335
2003	[6564] YOKOYAMA TETSUYA(2003) [GeoReM [510] ]	samp. 2709	IZU-BONIN ARC / IZU ARC / MIYAKEJIMA/MIYAKE-ZIMA / MIYAKEJIMA/MIYAKE-ZIMA / PACIFIC OCEAN	VOLCANIC ROCK	ANDESITE, BASALTIC	2	Arc	WHOLE ROCK	1.26	7551.8			35	68.8	0.54	3.59	10.6	10.2	3.38	1.25	4.22	5.37	3.22	3.49	0.52	2.02	0.344
2003	[6564] YOKOYAMA TETSUYA(2003) [GeoReM [510] ]	samp. 2801	IZU-BONIN ARC / IZU ARC / MIYAKEJIMA/MIYAKE-ZIMA / MIYAKEJIMA/MIYAKE-ZIMA / PACIFIC OCEAN	VOLCANIC ROCK	ANDESITE, BASALTIC	2	Arc	WHOLE ROCK	1.27	7611.73			28.5	51.8	0.43	2.76	7.9	7.68	2.59	1.05	3.55	4.38	2.67	2.77	0.42	1.58	0.249
2003	[6564] YOKOYAMA TETSUYA(2003) [GeoReM [510] ]	samp. 0217	IZU-BONIN ARC / IZU ARC / MIYAKEJIMA/MIYAKE-ZIMA / MIYAKEJIMA/MIYAKE-ZIMA / PACIFIC OCEAN	VOLCANIC ROCK	ANDESITE, BASALTIC	2	Arc	WHOLE ROCK	1.27	7611.73			40.2	78	0.63	4.16	13.1	12.1	3.85	1.39	5.3	6.12	3.8	4.17	0.6	2.37	0.435
2003	[6564] YOKOYAMA TETSUYA(2003) [GeoReM [510] ]	samp. 0103	IZU-BONIN ARC / IZU ARC / MIYAKEJIMA/MIYAKE-ZIMA / MIYAKEJIMA/MIYAKE-ZIMA / PACIFIC OCEAN	VOLCANIC ROCK	ANDESITE, BASALTIC	2	Arc	WHOLE ROCK	1.28	7671.67			34.5	65.3	0.56	3.53	10.5	9.5	3.25	1.12	4.31	5.17	3.09	3.34	0.47	2.02	0.348
2003	[6564] YOKOYAMA TETSUYA(2003) [GeoReM [510] ]	samp. 2805	IZU-BONIN ARC / IZU ARC / MIYAKEJIMA/MIYAKE-ZIMA / MIYAKEJIMA/MIYAKE-ZIMA / PACIFIC OCEAN	VOLCANIC ROCK	ANDESITE, BASALTIC	2	Arc	WHOLE ROCK	1.29	7731.6			28.5	52.1	0.43	2.89	8.4	8.28	2.72	1.09	3.64	4.74	2.81	3.01	0.44	1.64	0.262
2003	[6564] YOKOYAMA TETSUYA(2003) [GeoReM [510] ]	samp. 0141	IZU-BONIN ARC / IZU ARC / MIYAKEJIMA/MIYAKE-ZIMA / MIYAKEJIMA/MIYAKE-ZIMA / PACIFIC OCEAN	VOLCANIC ROCK	ANDESITE, BASALTIC	2	Arc	WHOLE ROCK	1.31	7851.47			33.5	69.5	0.56	3.94	11.5	10.7	3.51	1.25	4.65	5.65	3.5	3.85	0.56	2.17	0.37
2003	[6564] YOKOYAMA TETSUYA(2003) [GeoReM [510] ]	samp. 2821	IZU-BONIN ARC / IZU ARC / MIYAKEJIMA/MIYAKE-ZIMA / MIYAKEJIMA/MIYAKE-ZIMA / PACIFIC OCEAN	VOLCANIC ROCK	ANDESITE, BASALTIC	2	Arc	WHOLE ROCK	1.32	7911.41			32	74	0.58	3.4	9.9	9.37	3.1	1.09	4.18	4.83	3.05	3.3	0.46	2.14	0.361
2003	[6564] YOKOYAMA TETSUYA(2003) [GeoReM [510] ]	samp. 0240	IZU-BONIN ARC / IZU ARC / MIYAKEJIMA/MIYAKE-ZIMA / MIYAKEJIMA/MIYAKE-ZIMA / PACIFIC OCEAN	VOLCANIC ROCK	ANDESITE, BASALTIC	2	Arc	WHOLE ROCK	1.32	7911.41			40.4	75	0.63	4.14	12.4	11.8	3.87	1.3	5.06	6.1	3.57	4.07	0.56	2.35	0.4
2003	[6564] YOKOYAMA TETSUYA(2003) [GeoReM [510] ]	samp. 2822	IZU-BONIN ARC / IZU ARC / MIYAKEJIMA/MIYAKE-ZIMA / MIYAKEJIMA/MIYAKE-ZIMA / PACIFIC OCEAN	VOLCANIC ROCK	ANDESITE, BASALTIC	2	Arc	WHOLE ROCK	1.33	7971.34			33.2	71.3	0.57	3.53	9.9	9.73	3.09	1.15	4.32	5.23	3.06	3.35	0.47	2.09	0.348
2003	[6564] YOKOYAMA TETSUYA(2003) [GeoReM [510] ]	samp. 0150	IZU-BONIN ARC / IZU ARC / MIYAKEJIMA/MIYAKE-ZIMA / MIYAKEJIMA/MIYAKE-ZIMA / PACIFIC OCEAN	VOLCANIC ROCK	ANDESITE, BASALTIC	2	Arc	WHOLE ROCK	1.34	8031.28			35	65	0.56	3.6	10.4	10.3	3.51	1.18	4.42	5.41	3.18	3.5	0.48	2.1	0.343
2003	[6564] YOKOYAMA TETSUYA(2003) [GeoReM [510] ]	samp. 2902	IZU-BONIN ARC / IZU ARC / MIYAKEJIMA/MIYAKE-ZIMA / MIYAKEJIMA/MIYAKE-ZIMA / PACIFIC OCEAN	VOLCANIC ROCK	ANDESITE, BASALTIC	2	Arc	WHOLE ROCK	1.34	8031.28			37.4	69.5	0.58	3.89	11.3	10.4	3.55	1.28	4.63	5.63	3.44	3.56	0.53	2.08	0.351
2003	[6564] YOKOYAMA TETSUYA(2003) [GeoReM [510] ]	samp. 2704	IZU-BONIN ARC / IZU ARC / MIYAKEJIMA/MIYAKE-ZIMA / MIYAKEJIMA/MIYAKE-ZIMA / PACIFIC OCEAN	VOLCANIC ROCK	ANDESITE, BASALTIC	2	Arc	WHOLE ROCK	1.34	8031.28			39.6	74.5	0.62	4.13	12	11.5	3.72	1.37	4.93	6.07	3.71	4.03	0.59	2.16	0.384
2003	[6564] YOKOYAMA TETSUYA(2003) [GeoReM [510] ]	samp. 0116	IZU-BONIN ARC / IZU ARC / MIYAKEJIMA/MIYAKE-ZIMA / MIYAKEJIMA/MIYAKE-ZIMA / PACIFIC OCEAN	VOLCANIC ROCK	ANDESITE, BASALTIC	2	Arc	WHOLE ROCK	1.35	8091.21			31.6	58.3	0.49	3.32	9.6	9.26	3.07	1.13	4.02	4.97	3.01	3.26	0.46	1.83	0.307
2003	[6564] YOKOYAMA TETSUYA(2003) [GeoReM [510] ]	samp. 0110	IZU-BONIN ARC / IZU ARC / MIYAKEJIMA/MIYAKE-ZIMA / MIYAKEJIMA/MIYAKE-ZIMA / PACIFIC OCEAN	VOLCANIC ROCK	ANDESITE, BASALTIC	2	Arc	WHOLE ROCK	1.35	8091.21			35.3	64.9	0.53	3.58	10.7	10.1	3.29	1.24	4.43	5.49	3.23	3.52	0.5	2	0.335
2003	[6564] YOKOYAMA TETSUYA(2003) [GeoReM [510] ]	samp. 2809	IZU-BONIN ARC / IZU ARC / MIYAKEJIMA/MIYAKE-ZIMA / MIYAKEJIMA/MIYAKE-ZIMA / PACIFIC OCEAN	VOLCANIC ROCK	ANDESITE, BASALTIC	2	Arc	WHOLE ROCK	1.36	8151.15			25.6	57.3	0.52	2.54	7.4	7.12	2.28	0.92	3.1	3.96	2.34	2.49	0.37	1.85	0.311
2003	[6564] YOKOYAMA TETSUYA(2003) [GeoReM [510] ]	samp. 3019	IZU-BONIN ARC / IZU ARC / MIYAKEJIMA/MIYAKE-ZIMA / MIYAKEJIMA/MIYAKE-ZIMA / PACIFIC OCEAN	VOLCANIC ROCK	ANDESITE, BASALTIC	2	Arc	WHOLE ROCK	1.37	8211.08			34.4	60.5	0.53	3.52	9.9	10	3.43	1.14	4.38	5.11	3.18	3.38	0.48	1.96	0.317
2003	[6564] YOKOYAMA TETSUYA(2003) [GeoReM [510] ]	samp. 0106	IZU-BONIN ARC / IZU ARC / MIYAKEJIMA/MIYAKE-ZIMA / MIYAKEJIMA/MIYAKE-ZIMA / PACIFIC OCEAN	VOLCANIC ROCK	ANDESITE, BASALTIC	2	Arc	WHOLE ROCK	1.4	8390.88			34.3	64.5	0.54	3.76	10.6	9.88	3.26	1.2	4.29	5.53	3.28	3.64	0.51	1.98	0.33
2006	[9270] YOKOYAMA TETSUYA(2006) [GeoReM [2592] ]	samp. 0310	IZU-BONIN ARC / IZU ARC / MIYAKEJIMA/MIYAKE-ZIMA / MIYAKEJIMA/MIYAKE-ZIMA / PACIFIC OCEAN	VOLCANIC ROCK	ANDESITE, BASALTIC	2	Arc	WHOLE ROCK	1.29	7731.6			37	73.6	0.608	3.77	11.3	10.3	3.38	1.23	4.62	5.6	3.46	3.62	0.544	2.19	0.372
2006	[9270] YOKOYAMA TETSUYA(2006) [GeoReM [2592] ]	samp. 0137	IZU-BONIN ARC / IZU ARC / MIYAKEJIMA/MIYAKE-ZIMA / MIYAKEJIMA/MIYAKE-ZIMA / PACIFIC OCEAN	VOLCANIC ROCK	ANDESITE, BASALTIC	2	Arc	WHOLE ROCK	1.31	7851.47			37	68.6	0.541	3.95	11.4	10.8	3.54	1.2	4.54	5.65	3.44	3.67	0.519	2.14	0.374
2006	[9270] YOKOYAMA TETSUYA(2006) [GeoReM [2592] ]	samp. 0201	IZU-BONIN ARC / IZU ARC / MIYAKEJIMA/MIYAKE-ZIMA / MIYAKEJIMA/MIYAKE-ZIMA / PACIFIC OCEAN	VOLCANIC ROCK	ANDESITE, BASALTIC	2	Arc	WHOLE ROCK	1.32	7911.41			38.2	73.9	0.629	4.15	12.6	11.7	3.67	1.39	5.06	6.23	3.68	4.05	0.597	2.32	0.395
2006	[9270] YOKOYAMA TETSUYA(2006) [GeoReM [2592] ]	samp. 0231	IZU-BONIN ARC / IZU ARC / MIYAKEJIMA/MIYAKE-ZIMA / MIYAKEJIMA/MIYAKE-ZIMA / PACIFIC OCEAN	VOLCANIC ROCK	ANDESITE, BASALTIC	2	Arc	WHOLE ROCK	1.33	7971.34			39.5	75.6	0.631	4.25	12.1	11.3	3.69	1.37	4.84	5.98	3.64	3.92	0.576	2.31	0.394
2006	[9270] YOKOYAMA TETSUYA(2006) [GeoReM [2592] ]	samp. 2823	IZU-BONIN ARC / IZU ARC / MIYAKEJIMA/MIYAKE-ZIMA / MIYAKEJIMA/MIYAKE-ZIMA / PACIFIC OCEAN	VOLCANIC ROCK	ANDESITE, BASALTIC	2	Arc	WHOLE ROCK	1.34	8031.28			31.2	70.7	0.548	3.28	9.26	8.9	3.02	1.08	3.93	4.72	2.89	3.34	0.449	1.99	0.342
2006	[9270] YOKOYAMA TETSUYA(2006) [GeoReM [2592] ]	samp. 0143	IZU-BONIN ARC / IZU ARC / MIYAKEJIMA/MIYAKE-ZIMA / MIYAKEJIMA/MIYAKE-ZIMA / PACIFIC OCEAN	VOLCANIC ROCK	ANDESITE, BASALTIC	2	Arc	WHOLE ROCK	1.34	8031.28			35.4	62	0.552	3.89	11.3	10.6	3.51	1.34	4.5	5.58	3.39	3.63	0.545	1.98	0.335
2006	[9270] YOKOYAMA TETSUYA(2006) [GeoReM [2592] ]	samp. 0259	IZU-BONIN ARC / IZU ARC / MIYAKEJIMA/MIYAKE-ZIMA / MIYAKEJIMA/MIYAKE-ZIMA / PACIFIC OCEAN	VOLCANIC ROCK	ANDESITE, BASALTIC	2	Arc	WHOLE ROCK	1.34	8031.28			40.6	69	0.6	4.28	12.2	11.6	3.82	1.39	4.96	6.25	3.84	4.15	0.591	2.14	0.372
2006	[9270] YOKOYAMA TETSUYA(2006) [GeoReM [2592] ]	samp. 0135	IZU-BONIN ARC / IZU ARC / MIYAKEJIMA/MIYAKE-ZIMA / MIYAKEJIMA/MIYAKE-ZIMA / PACIFIC OCEAN	VOLCANIC ROCK	ANDESITE, BASALTIC	2	Arc	WHOLE ROCK	1.35	8091.21			34.4	59.9	0.518	3.81	10.4	10.1	3.37	1.13	4.14	5.51	3.45	3.33	0.488	1.88	0.33
2006	[9270] YOKOYAMA TETSUYA(2006) [GeoReM [2592] ]	samp. 0318	IZU-BONIN ARC / IZU ARC / MIYAKEJIMA/MIYAKE-ZIMA / MIYAKEJIMA/MIYAKE-ZIMA / PACIFIC OCEAN	VOLCANIC ROCK	ANDESITE, BASALTIC	2	Arc	WHOLE ROCK	1.35	8091.21			35.7	66.5	0.524	3.56	10.5	10	3.44	1.24	4.4	5.55	3.32	3.59	0.523	1.96	0.33
2006	[9270] YOKOYAMA TETSUYA(2006) [GeoReM [2592] ]	samp. 0212	IZU-BONIN ARC / IZU ARC / MIYAKEJIMA/MIYAKE-ZIMA / MIYAKEJIMA/MIYAKE-ZIMA / PACIFIC OCEAN	VOLCANIC ROCK	ANDESITE, BASALTIC	2	Arc	WHOLE ROCK	1.35	8091.21			38.3	70.4	0.619	4.02	11.7	10.7	3.61	1.29	4.68	5.8	3.58	3.65	0.526	2.21	0.367
2006	[9270] YOKOYAMA TETSUYA(2006) [GeoReM [2592] ]	samp. 0127	IZU-BONIN ARC / IZU ARC / MIYAKEJIMA/MIYAKE-ZIMA / MIYAKEJIMA/MIYAKE-ZIMA / PACIFIC OCEAN	VOLCANIC ROCK	ANDESITE, BASALTIC	2	Arc	WHOLE ROCK	1.36	8151.15			31.5	61.5	0.503	3.24	9	8.68	2.96	1.1	3.99	4.91	2.85	3.16	0.452	1.88	0.313
2006	[9270] YOKOYAMA TETSUYA(2006) [GeoReM [2592] ]	samp. 0129	IZU-BONIN ARC / IZU ARC / MIYAKEJIMA/MIYAKE-ZIMA / MIYAKEJIMA/MIYAKE-ZIMA / PACIFIC OCEAN	VOLCANIC ROCK	ANDESITE, BASALTIC	2	Arc	WHOLE ROCK	1.36	8151.15			34.3	58.8	0.512	3.62	10.5	9.88	3.31	1.18	4.35	5.32	3.33	3.43	0.503	1.9	0.316
2006	[9270] YOKOYAMA TETSUYA(2006) [GeoReM [2592] ]	samp. 0134	IZU-BONIN ARC / IZU ARC / MIYAKEJIMA/MIYAKE-ZIMA / MIYAKEJIMA/MIYAKE-ZIMA / PACIFIC OCEAN	VOLCANIC ROCK	ANDESITE, BASALTIC	2	Arc	WHOLE ROCK	1.36	8151.15			38.1	60.9	0.509	3.71	11.2	11.1	3.64	1.34	4.45	5.97	3.56	3.88	0.534	1.94	0.317
2006	[9270] YOKOYAMA TETSUYA(2006) [GeoReM [2592] ]	samp. 0108	IZU-BONIN ARC / IZU ARC / MIYAKEJIMA/MIYAKE-ZIMA / MIYAKEJIMA/MIYAKE-ZIMA / PACIFIC OCEAN	VOLCANIC ROCK	ANDESITE, BASALTIC	2	Arc	WHOLE ROCK	1.37	8211.08			32.9	62.4	0.508	3.37	10.2	9.51	3.09	1.15	4.19	5.19	3.11	3.32	0.471	2	0.321
2006	[9270] YOKOYAMA TETSUYA(2006) [GeoReM [2592] ]	samp. 0117	IZU-BONIN ARC / IZU ARC / MIYAKEJIMA/MIYAKE-ZIMA / MIYAKEJIMA/MIYAKE-ZIMA / PACIFIC OCEAN	VOLCANIC ROCK	ANDESITE, BASALTIC	2	Arc	WHOLE ROCK	1.37	8211.08			35.1	62.5	0.512	3.46	9.97	9.53	3.29	1.15	4.26	5.38	3.19	3.4	0.481	1.93	0.319
2006	[9270] YOKOYAMA TETSUYA(2006) [GeoReM [2592] ]	samp. 2701	IZU-BONIN ARC / IZU ARC / MIYAKEJIMA/MIYAKE-ZIMA / MIYAKEJIMA/MIYAKE-ZIMA / PACIFIC OCEAN	VOLCANIC ROCK	ANDESITE, BASALTIC	2	Arc	WHOLE ROCK	1.37	8211.08			34.9	71.8	0.568	3.82	11	10.3	3.42	1.19	4.48	5.69	3.41	3.68	0.528	2.09	0.351
2006	[9270] YOKOYAMA TETSUYA(2006) [GeoReM [2592] ]	samp. 0238	IZU-BONIN ARC / IZU ARC / MIYAKEJIMA/MIYAKE-ZIMA / MIYAKEJIMA/MIYAKE-ZIMA / PACIFIC OCEAN	VOLCANIC ROCK	ANDESITE, BASALTIC	2	Arc	WHOLE ROCK	1.37	8211.08			36.4	66	0.554	3.7	11.2	10.8	3.32	1.24	4.65	5.51	3.27	3.72	0.534	2.11	0.344
2016	[20417] FREYMUTH H. (2016)	samp. MJ-12-05	IZU-BONIN ARC / IZU ARC / MIYAKEJIMA/MIYAKE-ZIMA / MIYAKEJIMA/MIYAKE-ZIMA / PACIFIC OCEAN	VOLCANIC ROCK	BASALT	3	Arc	WHOLE ROCK	0.91	5454.08	42.967	392.7	18.68	35.5	0.287	1.59	4.943	5.12	1.823	0.777	2.619	3.144	1.95	1.924	0.304	1.123	0.123
2016	[20417] FREYMUTH H. (2016)	samp. S2-1	IZU-BONIN ARC / IZU ARC / IZU-OSHIMA / OSHIMA / PACIFIC OCEAN	VOLCANIC ROCK	BASALT	3	Arc	WHOLE ROCK	1.15	6892.51	53.676	556.3	23.49	46.69	0.532	2.222	6.677	6.468	2.247	0.821	3.222	3.882	2.426	2.433	0.381	1.494	0.261
2016	[20417] FREYMUTH H. (2016)	samp. NJ-2	IZU-BONIN ARC / IZU ARC / NIISHIMA /NII-ZIMA/NIIJIMA / PACIFIC OCEAN	VOLCANIC ROCK	BASALT	3	Arc	WHOLE ROCK			45.539	391.6	20.5	54.42	1.342	3.768	10.38	8.293	2.485	0.967	3.191	3.539	2.136	2.096	0.329	1.495	0.474
2007	[10790] TAMURA Y.(2007) [GeoReM [3021] ]	samp. 69	IZU-BONIN ARC / IZU ARC / TORISHIMA/MITUGO-YAMA / TORISHIMA/MITUGO-YAMA / PACIFIC OCEAN	VOLCANIC ROCK	BASALT	3	Arc	WHOLE ROCK	0.58	3476.22	40.8		10.1	15.8	0.6	0.727	2.22	2.51	1.02	0.442	1.51	1.98	1.31	1.26	0.194		0.6
2005	[8488] TAMURA Y.(2005) [GeoReM [1132] ]	samp. 2K-1391R4	IZU-BONIN ARC / IZU ARC / SUMISUJIMA / PACIFIC OCEAN	VOLCANIC ROCK	BASALT	3	Arc	WHOLE ROCK	0.6	3596.09			14.3	25.2	0.5	1.18	3.58	3.71	1.4	0.576	2.14	2.68	1.82	1.74	0.267		0.7
2010	[15968] KIMURA J.-I.(2010) [GeoReM [5465] ]	samp. IO-5	IZU-BONIN ARC / IZU ARC / IZU-OSHIMA / PACIFIC OCEAN	VOLCANIC ROCK	BASALT	3	Arc	WHOLE ROCK	0.574	3440.26		337.41	11.7269	25.3962	0.101	0.661	2.05	2.202	0.858	0.386	1.345	1.729	1.063	1.139	0.17	0.507	0.087
2010	[15968] KIMURA J.-I.(2010) [GeoReM [5465] ]	samp. IO-6	IZU-BONIN ARC / IZU ARC / IZU-OSHIMA / PACIFIC OCEAN	VOLCANIC ROCK	BASALT	3	Arc	WHOLE ROCK	0.68	4075.57		387.442	13.7336	31.4017	0.152	1.21	3.22	3.234	1.207	0.497	1.764	2.196	1.383	1.45	0.228	0.757	0.165
2010	[15968] KIMURA J.-I.(2010) [GeoReM [5465] ]	samp. NJ-5	IZU-BONIN ARC / IZU ARC / NIISHIMA /NII-ZIMA/NIIJIMA / PACIFIC OCEAN	VOLCANIC ROCK	BASALT	3	Arc	WHOLE ROCK	1.131	6778.64		393.417	19.1247	58.1651	1.171	4.838	11.85	8.351	2.459	0.962	3.088	3.432	2.002	2.063	0.315	1.387	0.765
2010	[15968] KIMURA J.-I.(2010) [GeoReM [5465] ]	samp. UJ-10A	IZU-BONIN ARC / IZU ARC / UDONEJIMA / PACIFIC OCEAN	VOLCANIC ROCK	BASALT	3	Arc	WHOLE ROCK	0.958	5741.76		230.832	17.8	64.9114	1.642	6.472	15.41	10.63	2.724	0.984	3.02	3.141	1.729	1.752	0.268	1.471	0.638
2010	[15968] KIMURA J.-I.(2010) [GeoReM [5465] ]	samp. NJ-1	IZU-BONIN ARC / IZU ARC / NIISHIMA /NII-ZIMA/NIIJIMA / PACIFIC OCEAN	VOLCANIC ROCK	BASALT	3	Arc	WHOLE ROCK	1.112	6664.76		398.879	19.1021	58.0909	1.253	4.784	11.36	8.357	2.441	0.956	3.042	3.427	1.975	2.057	0.311	1.377	0.751
2010	[15968] KIMURA J.-I.(2010) [GeoReM [5465] ]	samp. IO-19	IZU-BONIN ARC / IZU ARC / IZU-OSHIMA / PACIFIC OCEAN	VOLCANIC ROCK	BASALT	3	Arc	WHOLE ROCK	1.198	7180.2		612.367	20.9356	51.9021	0.531	2.565	6.81	6.224	2.097	0.773	2.998	3.506	2.126	2.206	0.349	1.304	0.343
2010	[15968] KIMURA J.-I.(2010) [GeoReM [5465] ]	samp. TS-10	IZU-BONIN ARC / IZU ARC / TOSHIMA / PACIFIC OCEAN	VOLCANIC ROCK	BASALT	3	Arc	WHOLE ROCK	0.91	5454.08		296.815	16.6187	59.3741	1.283	6.715	15.83	10.73	2.717	0.957	2.986	3.029	1.695	1.708	0.26	1.513	0.797
2010	[15968] KIMURA J.-I.(2010) [GeoReM [5465] ]	samp. UJ-8	IZU-BONIN ARC / IZU ARC / UDONEJIMA / PACIFIC OCEAN	VOLCANIC ROCK	BASALT	3	Arc	WHOLE ROCK	0.926	5549.97		251.604	18.0928	63.1624	1.607	5.992	14.48	10.26	2.663	0.955	2.959	2.936	1.644	1.712	0.26	1.429	0.516
2010	[15968] KIMURA J.-I.(2010) [GeoReM [5465] ]	samp. UJ-9	IZU-BONIN ARC / IZU ARC / UDONEJIMA / PACIFIC OCEAN	VOLCANIC ROCK	BASALT	3	Arc	WHOLE ROCK	0.935	5603.91		208.753	18.1257	64.3519	1.706	6.629	16.46	10.81	2.769	0.996	3.072	3.128	1.738	1.776	0.268	1.564	0.689
2010	[15968] KIMURA J.-I.(2010) [GeoReM [5465] ]	samp. TS-13	IZU-BONIN ARC / IZU ARC / TOSHIMA / PACIFIC OCEAN	VOLCANIC ROCK	BASALT	3	Arc	WHOLE ROCK	0.844	5058.5		271.555	16.8384	61.3351	1.395	6.849	16.09	10.45	2.599	0.909	2.836	2.859	1.598	1.628	0.25	1.515	0.98
2010	[15968] KIMURA J.-I.(2010) [GeoReM [5465] ]	samp. UJ-2	IZU-BONIN ARC / IZU ARC / UDONEJIMA / PACIFIC OCEAN	VOLCANIC ROCK	BASALT	3	Arc	WHOLE ROCK	0.894	5358.18		235.115	16.8438	63.0102	1.609	5.682	14.89	10.08	2.444	0.902	2.861	2.903	1.584	1.598	0.242	1.375	0.528
2010	[15968] KIMURA J.-I.(2010) [GeoReM [5465] ]	samp. UJ-10B	IZU-BONIN ARC / IZU ARC / UDONEJIMA / PACIFIC OCEAN	VOLCANIC ROCK	BASALT	3	Arc	WHOLE ROCK	0.742	4447.17		239.321	17.137	63.9233	1.591	6.128	14.95	10.02	2.684	0.98	3.037	3.183	1.772	1.813	0.274	1.557	0.684
2010	[15968] KIMURA J.-I.(2010) [GeoReM [5465] ]	samp. TS-12	IZU-BONIN ARC / IZU ARC / TOSHIMA / PACIFIC OCEAN	VOLCANIC ROCK	BASALT	3	Arc	WHOLE ROCK	0.845	5064.5		267.555	16.7451	62.0722	1.411	6.563	15.99	10.3	2.594	0.897	2.856	2.928	1.63	1.646	0.252	1.556	0.813
2010	[15968] KIMURA J.-I.(2010) [GeoReM [5465] ]	samp. NJ-2	IZU-BONIN ARC / IZU ARC / NIISHIMA /NII-ZIMA/NIIJIMA / PACIFIC OCEAN	VOLCANIC ROCK	BASALT	3	Arc	WHOLE ROCK	1.133	6790.62		398.52	18.6653	58.1794	1.141	4.264	10.82	8.173	2.44	0.952	3.052	3.428	1.963	2.033	0.314	1.404	0.596
2010	[15968] KIMURA J.-I.(2010) [GeoReM [5465] ]	samp. NJ-6A	IZU-BONIN ARC / IZU ARC / NIISHIMA /NII-ZIMA/NIIJIMA / PACIFIC OCEAN	VOLCANIC ROCK	BASALT	3	Arc	WHOLE ROCK	1.114	6676.75		400.033	17.9818	52.9011	1.035	3.863	9.61	7.341	2.248	0.871	2.906	3.099	1.777	1.899	0.284	1.213	0.493
2010	[15968] KIMURA J.-I.(2010) [GeoReM [5465] ]	samp. TS-5	IZU-BONIN ARC / IZU ARC / TOSHIMA / PACIFIC OCEAN	VOLCANIC ROCK	BASALT	3	Arc	WHOLE ROCK	0.854	5118.44		285.352	16.023	55.1553	1.962	8.564	19.87	11.85	2.799	0.954	3.005	2.883	1.606	1.724	0.265	1.894	1.482
2007	[10790] TAMURA Y.(2007) [GeoReM [3021] ]	samp. 35.5	IZU-BONIN ARC / IZU ARC / TORISHIMA/MITUGO-YAMA / TORISHIMA/MITUGO-YAMA / PACIFIC OCEAN	VOLCANIC ROCK	BASALT	3	Arc	WHOLE ROCK	0.56	3356.35	43.7		9.8	14.6	0.4	0.7	2.12	2.38	0.96	0.427	1.46	1.89	1.25	1.22	0.182		0.056
2007	[10790] TAMURA Y.(2007) [GeoReM [3021] ]	samp. 35	IZU-BONIN ARC / IZU ARC / TORISHIMA/MITUGO-YAMA / TORISHIMA/MITUGO-YAMA / PACIFIC OCEAN	VOLCANIC ROCK	BASALT	3	Arc	WHOLE ROCK	0.6	3596.09	45.1		10.1	16	0.5	0.738	2.26	2.55	1.03	0.446	1.57	1.99	1.32	1.3	0.195		0.06
2007	[10790] TAMURA Y.(2007) [GeoReM [3021] ]	samp. 7	IZU-BONIN ARC / IZU ARC / TORISHIMA/MITUGO-YAMA / TORISHIMA/MITUGO-YAMA / PACIFIC OCEAN	VOLCANIC ROCK	BASALT	3	Arc	WHOLE ROCK	0.58	3476.22	36.2		13.1	26.4	0.6	1.18	3.45	3.57	1.35	0.571	1.98	2.5	1.68	1.67	0.259		0.137
2007	[10790] TAMURA Y.(2007) [GeoReM [3021] ]	samp. D19-R12	IZU-BONIN ARC / IZU ARC / TORISHIMA/MITUGO-YAMA / TORISHIMA/MITUGO-YAMA / PACIFIC OCEAN	VOLCANIC ROCK	BASALT	3	Arc	WHOLE ROCK	0.61	3656.03	47.1		13.5	23.2	0.5	1.33	3.73	3.78	1.38	0.552	1.94	2.38	1.55	1.52	0.241		0.104
2007	[10790] TAMURA Y.(2007) [GeoReM [3021] ]	samp. 26	IZU-BONIN ARC / IZU ARC / TORISHIMA/MITUGO-YAMA / TORISHIMA/MITUGO-YAMA / PACIFIC OCEAN	VOLCANIC ROCK	BASALT	3	Arc	WHOLE ROCK	0.61	3656.03	32.4		14.9	28.5	0.4	1.49	4.32	4.33	1.58	0.607	2.23	2.73	1.81	1.79	0.277		0.151
2007	[10790] TAMURA Y.(2007) [GeoReM [3021] ]	samp. D9-R10	IZU-BONIN ARC / IZU ARC / TORISHIMA/MITUGO-YAMA / TORISHIMA/MITUGO-YAMA / PACIFIC OCEAN	VOLCANIC ROCK	BASALT	3	Arc	WHOLE ROCK	0.62	3715.96	50.5		14.5	27.4	0.2	1.45	4.05	4.14	1.48	0.576	2.13	2.57	1.71	1.67	0.261		0.129
2007	[10790] TAMURA Y.(2007) [GeoReM [3021] ]	samp. D15-R04	IZU-BONIN ARC / IZU ARC / TORISHIMA/MITUGO-YAMA / TORISHIMA/MITUGO-YAMA / PACIFIC OCEAN	VOLCANIC ROCK	BASALT	3	Arc	WHOLE ROCK	0.66	3955.7	50.9		14.9	24.2	0.4	1.2	3.53	3.87	1.46	0.595	2.17	2.66	1.77	1.69	0.264		0.079
2007	[10790] TAMURA Y.(2007) [GeoReM [3021] ]	samp. 1	IZU-BONIN ARC / IZU ARC / TORISHIMA/MITUGO-YAMA / TORISHIMA/MITUGO-YAMA / PACIFIC OCEAN	VOLCANIC ROCK	BASALT	3	Arc	WHOLE ROCK	0.65	3895.77	30.3		16.5	32.3	0.4	1.71	4.86	4.82	1.75	0.664	2.48	3.01	2	1.98	0.302		0.17
2007	[10790] TAMURA Y.(2007) [GeoReM [3021] ]	samp. 11	IZU-BONIN ARC / IZU ARC / TORISHIMA/MITUGO-YAMA / TORISHIMA/MITUGO-YAMA / PACIFIC OCEAN	VOLCANIC ROCK	BASALT	3	Arc	WHOLE ROCK	0.69	4135.51	43.2		16.1	30.8	0.5	1.65	4.67	4.75	1.75	0.66	2.51	3.13	2.04	1.97	0.311		0.162
2007	[10790] TAMURA Y.(2007) [GeoReM [3021] ]	samp. 37	IZU-BONIN ARC / IZU ARC / TORISHIMA/MITUGO-YAMA / TORISHIMA/MITUGO-YAMA / PACIFIC OCEAN	VOLCANIC ROCK	BASALT	3	Arc	WHOLE ROCK	0.78	4674.92	37		19.4	36.6	0.7	2.01	5.81	5.93	2.13	0.831	2.97	3.56	2.4	2.35	0.365		0.174
2007	[10515] ISHIZUKA O.(2007) [GeoReM [3011] ]	samp. GH717-1	IZU-BONIN ARC / BONIN ARC / MINAMI-IWOJIMA / MINAMI-IWOJIMA / PACIFIC OCEAN	VOLCANIC ROCK	BASALT	3	Arc	WHOLE ROCK					18.2	48.1	1.74	15.1	28.7	19.1	4.3	1.37	4.03	3.2	1.72	1.51	0.23	1.33	1.26
2007	[10515] ISHIZUKA O.(2007) [GeoReM [3011] ]	samp. GH720-1	IZU-BONIN ARC / BONIN ARC / MINAMI-IWOJIMA / MINAMI-IWOJIMA / PACIFIC OCEAN	VOLCANIC ROCK	BASALT	3	Arc	WHOLE ROCK					19	48.4	2.05	15.1	31.6	17.9	4.09	1.32	3.76	3.2	1.89	1.77	0.27	1.28	1.22
2010	[14052] TOLLSTRUP D. L.(2010) [GeoReM [5550] ]	samp. JB-2	IZU-BONIN ARC / IZU ARC / IZU-OSHIMA / OSHIMA / PACIFIC OCEAN	VOLCANIC ROCK	BASALT	3	Arc	WHOLE ROCK			57.8	548.8	24.4	46.3	0.49	2.12	6.12	5.96	2.12	0.78	2.88	3.77	2.45	2.33	0.35	1.36	0.285
2010	[14052] TOLLSTRUP D. L.(2010) [GeoReM [5550] ]	samp. 575-R4	IZU-BONIN ARC / IZU ARC / SUMISU CALDERA / PACIFIC OCEAN	VOLCANIC ROCK	BASALT	3	Arc	WHOLE ROCK	0.49	2936.81			12.1	20.6	0.4	0.79	2.53	2.85	1.13	0.48	1.77	2.26	1.5	1.46	0.22		0.06
2010	[14052] TOLLSTRUP D. L.(2010) [GeoReM [5550] ]	samp. D602-1	IZU-BONIN ARC / IZU ARC / AOGASHIMA/AO-GA-SIMA / AOGASHIMA/AO-GA-SIMA / PACIFIC OCEAN	VOLCANIC ROCK	BASALT	3	Arc	WHOLE ROCK	0.66	3955.7			15.8	31.8	0.22	0.83	3	3.54	1.36	0.58	2.04	2.56	1.67	1.71		0.91	0.06
2010	[14052] TOLLSTRUP D. L.(2010) [GeoReM [5550] ]	samp. 575-R7	IZU-BONIN ARC / IZU ARC / SUMISU CALDERA / PACIFIC OCEAN	VOLCANIC ROCK	BASALT	3	Arc	WHOLE ROCK	0.71	4255.38			16.8	34.8	0.7	1.75	5.05	5.01	1.79	0.7	2.58	3.09	2.05	1.98	0.3		0.189
2010	[14052] TOLLSTRUP D. L.(2010) [GeoReM [5550] ]	samp. TS-1	IZU-BONIN ARC / IZU ARC / SUMISUJIMA / PACIFIC OCEAN	VOLCANIC ROCK	BASALT	3	Arc	WHOLE ROCK	0.75	4495.12			23	37.4	0.35	1.94	5.83	6.24	2.3	0.87	3.19	3.93	2.57	2.59	0.38	1.32	0.168
2010	[14052] TOLLSTRUP D. L.(2010) [GeoReM [5550] ]	samp. IO-7	IZU-BONIN ARC / IZU ARC / AOGASHIMA/AO-GA-SIMA / AOGASHIMA/AO-GA-SIMA / PACIFIC OCEAN	VOLCANIC ROCK	BASALT	3	Arc	WHOLE ROCK	1.19	7132.25			26	44.8	0.48	2.22	6.69	6.63	2.43	0.87	3.3	4.16	2.73	2.72	0.4	1.54	0.262
2010	[14052] TOLLSTRUP D. L.(2010) [GeoReM [5550] ]	samp. MY-2	IZU-BONIN ARC / IZU ARC / IZU-OSHIMA / OSHIMA / PACIFIC OCEAN	VOLCANIC ROCK	BASALT	3	Arc	WHOLE ROCK	1.39	8330.95			36	67.5	0.61	3.5	10.25	9.79	3.45	1.23	4.68	5.59	3.58	3.49	0.52	2.16	0.339
2010	[14052] TOLLSTRUP D. L.(2010) [GeoReM [5550] ]	samp. 338-R3	IZU-BONIN ARC / BONIN ARC / MYOJIN RIFT / PACIFIC OCEAN	VOLCANIC ROCK	BASALT	3	Arc	WHOLE ROCK	1.72	10308.8	36	333.4	35.6	97.9	2.2	5.97	17.34	15.4	4.79	1.66	5.65	5.96	3.53	3.21	0.48	2.26	0.367
2010	[14052] TOLLSTRUP D. L.(2010) [GeoReM [5550] ]	samp. 338-R6	IZU-BONIN ARC / BONIN ARC / MYOJIN RIFT / PACIFIC OCEAN	VOLCANIC ROCK	BASALT	3	Arc	WHOLE ROCK	1.73	10368.7	36.7	328.2	35.8	97.1	2.17	5.92	17.17	15.67	4.75	1.72	5.61	6.01	3.6	3.21	0.49	2.34	0.369
2010	[14052] TOLLSTRUP D. L.(2010) [GeoReM [5550] ]	samp. 338-R4	IZU-BONIN ARC / BONIN ARC / MYOJIN RIFT / PACIFIC OCEAN	VOLCANIC ROCK	BASALT	3	Arc	WHOLE ROCK	1.73	10368.7	36	323.2	35.3	96.4	2.15	5.84	17.03	15.33	4.66	1.66	5.6	6.09	3.56	3.24	0.48	2.32	0.377
2011	[15499] ISHIZUKA O. (2011)	samp. R4	IZU-BONIN ARC / IZU ARC / BONIN RIDGE / PACIFIC OCEAN	VOLCANIC ROCK	BASALT	14	Arc	WHOLE ROCK	0.62	3715.96		285.206	17.86	25.547	0.44271	0.601691	2.35688	2.54112	1.11488	0.472843	1.77285	2.50512	1.75558	1.6766	0.280738	0.742385	0.0535067
2011	[15499] ISHIZUKA O. (2011)	samp. R5	IZU-BONIN ARC / IZU ARC / BONIN RIDGE / PACIFIC OCEAN	VOLCANIC ROCK	BASALT	14	Arc	WHOLE ROCK	0.63	3775.9		273.317	16.7956	26.3489	0.591876	0.805787	2.79457	2.83366	1.16259	0.481289	1.79868	2.42007	1.76613	1.74442	0.271549	0.772914	0.0460691
2011	[15499] ISHIZUKA O. (2011)	samp. R7	IZU-BONIN ARC / IZU ARC / BONIN RIDGE / PACIFIC OCEAN	VOLCANIC ROCK	BASALT	14	Arc	WHOLE ROCK	0.63	3775.9		303.598	16.563	26.2556	0.584066	0.797817	2.79978	2.80116	1.15111	0.478787	1.827	2.50821	1.73789	1.76933	0.269194	0.790282	0.0438201
2011	[15499] ISHIZUKA O. (2011)	samp. R19	IZU-BONIN ARC / IZU ARC / BONIN RIDGE / PACIFIC OCEAN	VOLCANIC ROCK	BASALT	14	Arc	WHOLE ROCK	0.63	3775.9		272.167	16.9709	24.9891	0.447541	0.645733	2.42295	2.63766	1.19957	0.454777	1.77212	2.46032	1.76316	1.79654	0.270266	0.763975	0.0467473
2011	[15499] ISHIZUKA O. (2011)	samp. R1	IZU-BONIN ARC / IZU ARC / BONIN RIDGE / PACIFIC OCEAN	VOLCANIC ROCK	BASALT	14	Arc	WHOLE ROCK	0.714	4279.35		278.525	17.9893	31.1885	0.706422	1.08831	3.66193	3.41138	1.33945	0.558753	2.03987	2.7907	1.90515	1.90563	0.290479	0.901475	0.0634475
2011	[15499] ISHIZUKA O. (2011)	samp. R7	IZU-BONIN ARC / IZU ARC / BONIN RIDGE / PACIFIC OCEAN	VOLCANIC ROCK	BASALT	14	Arc	WHOLE ROCK	0.7509	4500.51		302.107	20.5052	30.3011	0.722187	1.12278	3.9042	3.79168	1.53593	0.554407	2.31938	3.14796	2.20224	2.12117	0.351461	0.898963	0.0546851
2011	[15499] ISHIZUKA O. (2011)	samp. R5	IZU-BONIN ARC / IZU ARC / BONIN RIDGE / PACIFIC OCEAN	VOLCANIC ROCK	BASALT	14	Arc	WHOLE ROCK	0.7931	4753.44		321.532	20.7937	33.8225	0.685914	1.02785	3.5681	3.73022	1.63023	0.593893	2.42945	3.16054	2.29233	2.19662	0.337396	1.08143	0.0733657
2011	[15499] ISHIZUKA O. (2011)	samp. R2	IZU-BONIN ARC / IZU ARC / BONIN RIDGE / PACIFIC OCEAN	VOLCANIC ROCK	BASALT	14	Arc	WHOLE ROCK	0.84	5034.53		352.008	23.3136	30.9735	0.831377	0.96464	3.5117	3.74068	1.62243	0.628007	2.56095	3.49192	2.46626	2.40436	0.397052	1.03091	0.0814159
2011	[15499] ISHIZUKA O. (2011)	samp. R8	IZU-BONIN ARC / IZU ARC / BONIN RIDGE / PACIFIC OCEAN	VOLCANIC ROCK	BASALT	14	Arc	WHOLE ROCK	0.8419	5045.92		299.15	20.922	26.8958	0.850814	1.2531	4.36547	4.16851	1.671	0.588696	2.50631	3.29888	2.24704	2.20588	0.342756	0.859248	0.0507027
2011	[15499] ISHIZUKA O. (2011)	samp. R5	IZU-BONIN ARC / IZU ARC / BONIN RIDGE / PACIFIC OCEAN	VOLCANIC ROCK	BASALT	14	Arc	WHOLE ROCK	0.86	5154.4		372.939	25.3532	34.7823	0.628973	0.773803	3.01614	3.35071	1.78221	0.662773	2.98101	4.08286	2.91306	2.86659	0.430031	0.995535	0.0868558
2011	[15499] ISHIZUKA O. (2011)	samp. R13	IZU-BONIN ARC / IZU ARC / BONIN RIDGE / PACIFIC OCEAN	VOLCANIC ROCK	BASALT	14	Arc	WHOLE ROCK	0.87	5214.34		403.466	25.0313	33.019	0.572244	0.719828	2.93708	3.20264	1.43381	0.564609	2.37046	3.51012	2.41649	2.5111	0.388298	0.922063	0.0577645
2011	[15499] ISHIZUKA O. (2011)	samp. R5	IZU-BONIN ARC / IZU ARC / BONIN RIDGE / PACIFIC OCEAN	VOLCANIC ROCK	BASALT	14	Arc	WHOLE ROCK	0.91	5454.08		365.52	23.9385	30.9032	0.890523	1.09012	3.8497	4.05972	1.70029	0.659807	2.57919	3.61458	2.50589	2.56342	0.397454	1.02211	0.0846166
2011	[15499] ISHIZUKA O. (2011)	samp. R13	IZU-BONIN ARC / IZU ARC / BONIN RIDGE / PACIFIC OCEAN	VOLCANIC ROCK	BASALT	14	Arc	WHOLE ROCK	0.914	5478.05		400.94	24.1561	33.2402	0.675557	0.961874	3.53126	3.80441	1.66266	0.601446	2.57134	3.69293	2.57915	2.63085	0.41251	1.12457	0.0617316
2011	[15499] ISHIZUKA O. (2011)	samp. R17	IZU-BONIN ARC / IZU ARC / BONIN RIDGE / PACIFIC OCEAN	VOLCANIC ROCK	BASALT	14	Arc	WHOLE ROCK	0.9459	5669.24		388.488	24.9872	29.4781	0.677619	0.969031	3.52866	3.7733	1.72965	0.578439	2.6289	3.85593	2.71712	2.77058	0.425985	1.0189	0.0546409
2011	[15499] ISHIZUKA O. (2011)	samp. R26	IZU-BONIN ARC / IZU ARC / BONIN RIDGE / PACIFIC OCEAN	VOLCANIC ROCK	BASALT	14	Arc	WHOLE ROCK	0.95	5693.81		387.917	24.6385	36.0692	0.680552	0.835722	3.27168	3.86314	1.68533	0.675061	2.69134	3.86187	2.82405	2.72452	0.435129	1.09327	0.0647221
2011	[15499] ISHIZUKA O. (2011)	samp. R13	IZU-BONIN ARC / IZU ARC / BONIN RIDGE / PACIFIC OCEAN	VOLCANIC ROCK	BASALT	14	Arc	WHOLE ROCK	0.96	5753.75		374.136	27.4007	37.4003	0.939374	1.23272	4.22508	4.45283	1.89736	0.73495	2.86915	4.07061	2.76295	2.85396	0.439927	1.11301	0.0599594
2011	[15499] ISHIZUKA O. (2011)	samp. R5	IZU-BONIN ARC / IZU ARC / BONIN RIDGE / PACIFIC OCEAN	VOLCANIC ROCK	BASALT	14	Arc	WHOLE ROCK	0.9965	5972.51		326.441	26.9546	48.0377	1.00016	1.55603	5.49687	5.30619	2.15229	0.797438	3.13394	4.15932	2.9398	2.87759	0.449041	1.357	0.0828703
2011	[15499] ISHIZUKA O. (2011)	samp. R18	IZU-BONIN ARC / IZU ARC / BONIN RIDGE / PACIFIC OCEAN	VOLCANIC ROCK	BASALT	14	Arc	WHOLE ROCK	1.0036	6015.07		416.076	27.3562	33.2773	0.677174	1.00399	3.74191	3.88429	1.69376	0.614243	2.69158	3.98292	2.80157	2.84975	0.455069	0.993888	0.0541627
2011	[15499] ISHIZUKA O. (2011)	samp. R19	IZU-BONIN ARC / IZU ARC / BONIN RIDGE / PACIFIC OCEAN	VOLCANIC ROCK	BASALT	14	Arc	WHOLE ROCK	1.016	6089.38		422.821	26.9271	16.265	0.645792	1.01831	3.61353	3.82108	1.74977	0.619009	2.79103	3.96238	2.8224	2.85806	0.453691	0.685134	0.04466
2011	[15499] ISHIZUKA O. (2011)	samp. R23	IZU-BONIN ARC / IZU ARC / BONIN RIDGE / PACIFIC OCEAN	VOLCANIC ROCK	BASALT	14	Arc	WHOLE ROCK	1.0475	6278.18		408.129	29.9471	42.025	0.750395	1.09759	4.11008	4.48709	2.01021	0.751948	3.31318	4.49323	3.23495	3.37753	0.523986	1.3205	0.0639875
2011	[15499] ISHIZUKA O. (2011)	samp. R14	IZU-BONIN ARC / IZU ARC / BONIN RIDGE / PACIFIC OCEAN	VOLCANIC ROCK	BASALT	14	Arc	WHOLE ROCK	1.065	6383.07		333.645	28.9354	49.0719	2.89429	2.11634	6.37056	5.76716	2.30778	0.872812	3.29168	4.34015	3.02701	2.93019	0.459512	1.53295	0.143144
2011	[15499] ISHIZUKA O. (2011)	samp. R9	IZU-BONIN ARC / IZU ARC / BONIN RIDGE / PACIFIC OCEAN	VOLCANIC ROCK	BASALT	14	Arc	WHOLE ROCK	1.083	6490.95		429.005	30.6089	44.229	0.972622	1.23321	4.41684	4.88819	1.94327	0.796048	3.19519	4.40728	3.06806	3.14659	0.490121	1.32354	0.0656494
2011	[15499] ISHIZUKA O. (2011)	samp. R3	IZU-BONIN ARC / IZU ARC / BONIN RIDGE / PACIFIC OCEAN	VOLCANIC ROCK	BASALT	14	Arc	WHOLE ROCK	1.09	6532.9		437.172	28.5125	40.4183	1.0772	1.14035	4.13159	4.5587	1.92456	0.794935	3.11614	4.37673	3.12971	3.13148	0.50845	1.32813	0.0933588
2011	[15499] ISHIZUKA O. (2011)	samp. R6	IZU-BONIN ARC / IZU ARC / BONIN RIDGE / PACIFIC OCEAN	VOLCANIC ROCK	BASALT	14	Arc	WHOLE ROCK	1.108	6640.79		379.287	29.8404	44.3329	1.42277	1.46868	4.93681	5.0451	2.05923	0.838371	3.17792	4.40675	3.16735	3.05777	0.480906	1.34818	0.0869621
2011	[15499] ISHIZUKA O. (2011)	samp. R21	IZU-BONIN ARC / IZU ARC / BONIN RIDGE / PACIFIC OCEAN	VOLCANIC ROCK	BASALT	14	Arc	WHOLE ROCK	1.123	6730.69		448.9	29.3306	24.5181	0.809592	1.19207	4.32848	4.60761	2.14615	0.701975	3.22042	4.81073	3.23899	3.33781	0.52152	1.0121	0.0578602
2011	[15499] ISHIZUKA O. (2011)	samp. R5	IZU-BONIN ARC / IZU ARC / BONIN RIDGE / PACIFIC OCEAN	VOLCANIC ROCK	BASALT	14	Arc	WHOLE ROCK	1.132	6784.63		422.753	30.6467	43.6235	1.74886	1.78344	5.55887	5.39256	2.24844	0.85145	3.4904	4.49266	3.26463	3.13136	0.485803	1.33954	0.114031
2011	[15499] ISHIZUKA O. (2011)	samp. R2	IZU-BONIN ARC / IZU ARC / BONIN RIDGE / PACIFIC OCEAN	VOLCANIC ROCK	BASALT	14	Arc	WHOLE ROCK	1.1521	6905.1		470.458	32.3874	46.1671	0.874055	1.25494	4.71568	4.99249	2.19723	0.792301	3.38873	4.77894	3.36173	3.45266	0.532362	1.51433	0.0791904
2011	[15499] ISHIZUKA O. (2011)	samp. R7	IZU-BONIN ARC / IZU ARC / BONIN RIDGE / PACIFIC OCEAN	VOLCANIC ROCK	BASALT	14	Arc	WHOLE ROCK	1.196	7168.21		431.488	31.7736	50.6776	0.987175	1.29089	4.687	5.1658	2.14635	0.886855	3.42449	4.81566	3.3294	3.42107	0.539734	1.49672	0.0660125
2011	[15499] ISHIZUKA O. (2011)	samp. R15	IZU-BONIN ARC / IZU ARC / BONIN RIDGE / PACIFIC OCEAN	VOLCANIC ROCK	BASALT	14	Arc	WHOLE ROCK	1.2077	7238.34		382.836	27.1232	57.8933	1.34483	1.91297	6.61976	6.09982	2.37692	0.821742	3.32172	4.34061	3.04227	3.33266	0.546213	1.66614	0.0929686
2011	[15499] ISHIZUKA O. (2011)	samp. R4	IZU-BONIN ARC / IZU ARC / BONIN RIDGE / PACIFIC OCEAN	VOLCANIC ROCK	BASALT	14	Arc	WHOLE ROCK	1.2348	7400.76		447.003	30.5189	50.9021	0.962438	1.34753	4.93989	5.15447	2.07199	0.84334	3.56232	4.83788	3.28753	3.48832	0.547929	1.58021	0.0755849
2011	[15499] ISHIZUKA O. (2011)	samp. R1	IZU-BONIN ARC / IZU ARC / BONIN RIDGE / PACIFIC OCEAN	VOLCANIC ROCK	BASALT	14	Arc	WHOLE ROCK	1.285	7701.63		527.575	34.637	47.5336	1.10878	1.42167	4.84506	5.23111	2.25213	0.763054	3.5123	5.07776	3.51929	3.79526	0.57699	1.57601	0.0863568
2011	[15499] ISHIZUKA O. (2011)	samp. R14	IZU-BONIN ARC / IZU ARC / BONIN RIDGE / PACIFIC OCEAN	VOLCANIC ROCK	BASALT	14	Arc	WHOLE ROCK	1.3	7791.54		465.917	36.281	53.822	1.12937	1.45784	5.26134	5.69674	2.43617	0.960287	3.88285	5.46196	3.84017	4.10699	0.632303	1.62092	0.0806011
2011	[15499] ISHIZUKA O. (2011)	samp. R9	IZU-BONIN ARC / IZU ARC / BONIN RIDGE / PACIFIC OCEAN	VOLCANIC ROCK	BASALT	14	Arc	WHOLE ROCK	1.325	7941.37		454.518	37.2522	59.3002	1.64302	1.77261	6.22575	6.32876	2.50958	0.967295	3.9671	5.47834	3.794	3.75462	0.601039	1.6436	0.103632
2011	[15499] ISHIZUKA O. (2011)	samp. R1	IZU-BONIN ARC / IZU ARC / BONIN RIDGE / PACIFIC OCEAN	VOLCANIC ROCK	BASALT	14	Arc	WHOLE ROCK	1.38	8271.01		503.647	33.5793	55.8693	1.2163	1.65964	5.78394	6.2271	2.41945	1.05308	3.79965	5.14817	3.45627	3.41344	0.519243	1.66656	0.0805528
2011	[15499] ISHIZUKA O. (2011)	samp. R10	IZU-BONIN ARC / IZU ARC / BONIN RIDGE / PACIFIC OCEAN	VOLCANIC ROCK	BASALT	14	Arc	WHOLE ROCK	1.4	8390.88		363.514	34.3854	70.0158	1.85585	2.477	8.43773	7.90212	3.02599	0.978414	4.26577	5.56468	3.72802	3.67601	0.581044	2.09282	0.14183
2011	[15499] ISHIZUKA O. (2011)	samp. R11	IZU-BONIN ARC / IZU ARC / BONIN RIDGE / PACIFIC OCEAN	VOLCANIC ROCK	BASALT	14	Arc	WHOLE ROCK	1.482	8882.35		481.087	49.573	77.7271	2.71288	2.72472	8.76007	8.97166	3.61887	1.34815	5.58936	7.25018	5.24684	5.22621	0.813987	2.55621	0.16827
2015	[19795] ISHIZUKA O. (2015)	samp. 09102208	IZU-BONIN ARC / IZU ARC / IZU-OSHIMA / OSHIMA / PACIFIC OCEAN	VOLCANIC ROCK	BASALT	3	Arc	WHOLE ROCK	0.85	5094.47		366.21	15.8	40.02	0.71	2.93	8.01	5.32	1.69	0.66	2.09	2.38	1.58	1.57	0.24	1.07	0.27
2015	[19795] ISHIZUKA O. (2015)	samp. 09102211	IZU-BONIN ARC / IZU ARC / IZU-OSHIMA / OSHIMA / PACIFIC OCEAN	VOLCANIC ROCK	BASALT	3	Arc	WHOLE ROCK	0.86	5154.4		357.48	15.02	40.41	0.75	3.04	7.96	5.71	1.77	0.74	2.18	2.39	1.61	1.58	0.25	1.1	0.28
2015	[19795] ISHIZUKA O. (2015)	samp. 09102305	IZU-BONIN ARC / IZU ARC / IZU-OSHIMA / OSHIMA / PACIFIC OCEAN	VOLCANIC ROCK	BASALT	3	Arc	WHOLE ROCK	0.86	5154.4		423.19	17.5	38.43	0.67	2.73	7.42	5.66	1.75	0.69	2.29	2.68	1.69	1.65	0.25	1.06	0.26
2015	[19795] ISHIZUKA O. (2015)	samp. 09102207	IZU-BONIN ARC / IZU ARC / IZU-OSHIMA / OSHIMA / PACIFIC OCEAN	VOLCANIC ROCK	BASALT	3	Arc	WHOLE ROCK	0.87	5214.34		367.78	16.24	41.32	0.75	3.05	7.91	5.83	1.83	0.72	2.27	2.51	1.71	1.7	0.26	1.15	0.28
2015	[19795] ISHIZUKA O. (2015)	samp. 09022309	IZU-BONIN ARC / IZU ARC / IZU-OSHIMA / OSHIMA / PACIFIC OCEAN	VOLCANIC ROCK	BASALT	3	Arc	WHOLE ROCK	0.87	5214.34		425	17.5	32.8	0.38	1.82	5.29	4.67	1.6	0.63	2.26	2.67	1.73	1.73	0.27	0.94	0.19
2015	[19795] ISHIZUKA O. (2015)	samp. 09122106	IZU-BONIN ARC / IZU ARC / IZU-OSHIMA / OSHIMA / PACIFIC OCEAN	VOLCANIC ROCK	BASALT	3	Arc	WHOLE ROCK	0.89	5334.21		422.58	16.98	32.53	0.36	2.72	6.84	5	1.59	0.64	2.17	2.77	1.8	1.72	0.27	0.96	0.19
2015	[19795] ISHIZUKA O. (2015)	samp. 09022308	IZU-BONIN ARC / IZU ARC / IZU-OSHIMA / OSHIMA / PACIFIC OCEAN	VOLCANIC ROCK	BASALT	3	Arc	WHOLE ROCK	0.89	5334.21		425	18.2	33.9	0.37	1.79	5.48	4.75	1.6	0.65	2.21	2.75	1.84	1.77	0.28	1.01	0.2
2015	[19795] ISHIZUKA O. (2015)	samp. 09022307	IZU-BONIN ARC / IZU ARC / IZU-OSHIMA / OSHIMA / PACIFIC OCEAN	VOLCANIC ROCK	BASALT	3	Arc	WHOLE ROCK	0.9	5394.14		412	18.2	34	0.38	1.81	5.4	4.74	1.63	0.64	2.16	2.71	1.8	1.75	0.27	0.98	0.2
2015	[19795] ISHIZUKA O. (2015)	samp. 09102212	IZU-BONIN ARC / IZU ARC / IZU-OSHIMA / OSHIMA / PACIFIC OCEAN	VOLCANIC ROCK	BASALT	3	Arc	WHOLE ROCK	0.91	5454.08		400.85	18.93	40.8	0.66	3.18	8.21	6.54	2.12	0.76	2.69	2.97	1.9	1.84	0.29	1.09	0.27
2015	[19795] ISHIZUKA O. (2015)	samp. 09122202	IZU-BONIN ARC / IZU ARC / IZU-OSHIMA / OSHIMA / PACIFIC OCEAN	VOLCANIC ROCK	BASALT	3	Arc	WHOLE ROCK	0.97	5813.68		427	19.3	38.4	0.43	2.27	6.65	5.28	1.87	0.7	2.48	3.06	1.98	1.86	0.31	1.14	0.21
2015	[19795] ISHIZUKA O. (2015)	samp. 09022311	IZU-BONIN ARC / IZU ARC / IZU-OSHIMA / OSHIMA / PACIFIC OCEAN	VOLCANIC ROCK	BASALT	3	Arc	WHOLE ROCK	0.99	5933.55		480	20.6	38.3	0.44	2.1	6.16	5.35	1.9	0.7	2.57	3.18	2.07	2.06	0.31	1.12	0.24
2015	[19795] ISHIZUKA O. (2015)	samp. 09102103	IZU-BONIN ARC / IZU ARC / IZU-OSHIMA / OSHIMA / PACIFIC OCEAN	VOLCANIC ROCK	BASALT	3	Arc	WHOLE ROCK	1.03	6173.29		485	22.9	39.7	0.42	1.96	5.89	5.33	1.98	0.71	2.99	3.51	2.35	2.41	0.35	1.24	0.2
2015	[19795] ISHIZUKA O. (2015)	samp. 11020207-1	IZU-BONIN ARC / IZU ARC / IZU-OSHIMA / OSHIMA / PACIFIC OCEAN	VOLCANIC ROCK	BASALT	3	Arc	WHOLE ROCK	1.04	6233.23		312.45	26.24	43.42	0.33	1.83	5.82	5.59	2.09	0.87	3.24	3.95	2.66	2.73	0.42	1.35	0.21
2015	[19795] ISHIZUKA O. (2015)	samp. 09022411-1	IZU-BONIN ARC / IZU ARC / IZU-OSHIMA / OSHIMA / PACIFIC OCEAN	VOLCANIC ROCK	BASALT	3	Arc	WHOLE ROCK	1.05	6293.16		458.37	20.54	46.25	0.84	2.89	8.25	6.38	2.05	0.79	2.77	3.04	1.96	1.97	0.3	1.24	0.31
2015	[19795] ISHIZUKA O. (2015)	samp. 11122607-1	IZU-BONIN ARC / IZU ARC / IZU-OSHIMA / OSHIMA / PACIFIC OCEAN	VOLCANIC ROCK	BASALT	3	Arc	WHOLE ROCK	1.06	6353.1		489.61	21.14	39.19	0.43	2.14	6.28	5.26	1.77	0.64	2.43	3.06	1.99	1.97	0.3	1.06	0.19
2015	[19795] ISHIZUKA O. (2015)	samp. 11122607-2	IZU-BONIN ARC / IZU ARC / IZU-OSHIMA / OSHIMA / PACIFIC OCEAN	VOLCANIC ROCK	BASALT	3	Arc	WHOLE ROCK	1.07	6413.03		516.88	20.98	41.75	0.47	2.19	6.5	5.52	1.87	0.69	2.54	3.2	2.14	2.08	0.32	1.16	0.21
2015	[19795] ISHIZUKA O. (2015)	samp. 09022301	IZU-BONIN ARC / IZU ARC / IZU-OSHIMA / OSHIMA / PACIFIC OCEAN	VOLCANIC ROCK	BASALT	3	Arc	WHOLE ROCK	1.09	6532.9		511	21.4	42.6	0.58	2.55	7.42	6.22	2.02	0.77	2.75	3.29	2.14	2.11	0.32	1.27	0.27
2015	[19795] ISHIZUKA O. (2015)	samp. 09022306	IZU-BONIN ARC / IZU ARC / IZU-OSHIMA / OSHIMA / PACIFIC OCEAN	VOLCANIC ROCK	BASALT	3	Arc	WHOLE ROCK	1.1	6592.84		525	23	42.9	0.47	2.33	6.98	6.18	2.16	0.79	2.96	3.6	2.37	2.34	0.36	1.3	0.25
2015	[19795] ISHIZUKA O. (2015)	samp. 11122702	IZU-BONIN ARC / IZU ARC / IZU-OSHIMA / OSHIMA / PACIFIC OCEAN	VOLCANIC ROCK	BASALT	3	Arc	WHOLE ROCK	1.11	6652.77		569.09	22.85	41.71	0.46	2.32	6.78	5.85	1.93	0.71	2.69	3.59	2.23	2.21	0.34	1.24	0.22
2015	[19795] ISHIZUKA O. (2015)	samp. 11013101-1	IZU-BONIN ARC / IZU ARC / IZU-OSHIMA / OSHIMA / PACIFIC OCEAN	VOLCANIC ROCK	BASALT	3	Arc	WHOLE ROCK	1.11	6652.77		526.25	21.72	46.74	0.8	3.26	8.91	7.13	2.26	0.84	2.95	3.51	2.24	2.22	0.34	1.36	0.3
2015	[19795] ISHIZUKA O. (2015)	samp. 11013107-2	IZU-BONIN ARC / IZU ARC / IZU-OSHIMA / OSHIMA / PACIFIC OCEAN	VOLCANIC ROCK	BASALT	3	Arc	WHOLE ROCK	1.11	6652.77		492.46	21.88	50.51	0.97	3.62	9.73	7.59	2.26	0.88	3.08	3.5	2.25	2.25	0.34	1.43	0.34
2015	[19795] ISHIZUKA O. (2015)	samp. 11013101-3	IZU-BONIN ARC / IZU ARC / IZU-OSHIMA / OSHIMA / PACIFIC OCEAN	VOLCANIC ROCK	BASALT	3	Arc	WHOLE ROCK	1.12	6712.71		535.62	22.05	47.59	0.81	3.24	9.07	7.12	2.23	0.85	3.02	3.5	2.24	2.21	0.35	1.38	0.31
2015	[19795] ISHIZUKA O. (2015)	samp. 11013107-1	IZU-BONIN ARC / IZU ARC / IZU-OSHIMA / OSHIMA / PACIFIC OCEAN	VOLCANIC ROCK	BASALT	3	Arc	WHOLE ROCK	1.12	6712.71		500.4	22.57	50.09	1.03	3.61	9.88	7.94	2.42	0.91	3.02	3.61	2.31	2.23	0.36	1.43	0.35
2015	[19795] ISHIZUKA O. (2015)	samp. 11013102	IZU-BONIN ARC / IZU ARC / IZU-OSHIMA / OSHIMA / PACIFIC OCEAN	VOLCANIC ROCK	BASALT	3	Arc	WHOLE ROCK	1.12	6712.71		531.08	21.56	47.03	0.85	3.22	9.1	7.23	2.35	0.85	3.1	3.44	2.24	2.27	0.35	1.38	0.32
2015	[19795] ISHIZUKA O. (2015)	samp. 09022411-2	IZU-BONIN ARC / IZU ARC / IZU-OSHIMA / OSHIMA / PACIFIC OCEAN	VOLCANIC ROCK	BASALT	3	Arc	WHOLE ROCK	1.13	6772.64		533.26	22.2	47.84	0.88	3.11	8.62	6.84	2.21	0.8	2.98	3.31	2.12	2.02	0.33	1.3	0.33
2015	[19795] ISHIZUKA O. (2015)	samp. 11013108	IZU-BONIN ARC / IZU ARC / IZU-OSHIMA / OSHIMA / PACIFIC OCEAN	VOLCANIC ROCK	BASALT	3	Arc	WHOLE ROCK	1.13	6772.64		511.94	22.53	51.98	1.02	3.61	9.97	7.59	2.42	0.93	3.04	3.48	2.26	2.19	0.34	1.39	0.34
2015	[19795] ISHIZUKA O. (2015)	samp. 10012202	IZU-BONIN ARC / IZU ARC / IZU-OSHIMA / OSHIMA / PACIFIC OCEAN	VOLCANIC ROCK	BASALT	3	Arc	WHOLE ROCK	1.13	6772.64		566	22.3	42.3	0.53	2.35	6.9	5.89	2.14	0.79	2.88	3.49	2.29	2.28	0.37	1.27	0.26
2015	[19795] ISHIZUKA O. (2015)	samp. 11013101-2	IZU-BONIN ARC / IZU ARC / IZU-OSHIMA / OSHIMA / PACIFIC OCEAN	VOLCANIC ROCK	BASALT	3	Arc	WHOLE ROCK	1.13	6772.64		546.94	22.71	48.98	0.85	3.35	9.16	7.41	2.29	0.88	3.11	3.67	2.35	2.29	0.38	1.41	0.31
2015	[19795] ISHIZUKA O. (2015)	samp. 11013103-2	IZU-BONIN ARC / IZU ARC / IZU-OSHIMA / OSHIMA / PACIFIC OCEAN	VOLCANIC ROCK	BASALT	3	Arc	WHOLE ROCK	1.14	6832.58		502.3	22.94	53.68	1.03	3.73	10.18	7.87	2.42	0.91	3.14	3.57	2.34	2.27	0.35	1.47	0.35
2015	[19795] ISHIZUKA O. (2015)	samp. 09102101	IZU-BONIN ARC / IZU ARC / IZU-OSHIMA / OSHIMA / PACIFIC OCEAN	VOLCANIC ROCK	BASALT	3	Arc	WHOLE ROCK	1.15	6892.51		547	23.3	41.6	0.4	2.03	6.07	5.77	2.03	0.75	3.04	3.63	2.42	2.38	0.37	1.28	0.21
2015	[19795] ISHIZUKA O. (2015)	samp. 11122802-3	IZU-BONIN ARC / IZU ARC / IZU-OSHIMA / OSHIMA / PACIFIC OCEAN	VOLCANIC ROCK	BASALT	3	Arc	WHOLE ROCK	1.15	6892.51		538.75	22.56	39.19	0.36	1.89	5.74	5.43	2.06	0.78	2.88	3.65	2.39	2.43	0.37	1.29	0.19
2015	[19795] ISHIZUKA O. (2015)	samp. 11122608	IZU-BONIN ARC / IZU ARC / IZU-OSHIMA / OSHIMA / PACIFIC OCEAN	VOLCANIC ROCK	BASALT	3	Arc	WHOLE ROCK	1.15	6892.51		549.55	23.43	42.14	0.57	2.5	7.13	6.25	2.24	0.81	3.08	3.73	2.57	2.45	0.39	1.32	0.25
2015	[19795] ISHIZUKA O. (2015)	samp. 09022511	IZU-BONIN ARC / IZU ARC / IZU-OSHIMA / OSHIMA / PACIFIC OCEAN	VOLCANIC ROCK	BASALT	3	Arc	WHOLE ROCK	1.15	6892.51		518.93	26.36	52.13	0.57	2.51	7.54	6.83	2.33	0.88	3.2	4.03	2.69	2.6	0.41	1.54	0.29
2015	[19795] ISHIZUKA O. (2015)	samp. 09022414-2	IZU-BONIN ARC / IZU ARC / IZU-OSHIMA / OSHIMA / PACIFIC OCEAN	VOLCANIC ROCK	BASALT	3	Arc	WHOLE ROCK	1.16	6952.45		500.67	22.64	51.06	0.93	3.39	9.49	7.47	2.35	0.86	2.93	3.51	2.33	2.22	0.35	1.39	0.37
2015	[19795] ISHIZUKA O. (2015)	samp. 11122805	IZU-BONIN ARC / IZU ARC / IZU-OSHIMA / OSHIMA / PACIFIC OCEAN	VOLCANIC ROCK	BASALT	3	Arc	WHOLE ROCK	1.16	6952.45		597.31	22.27	42.13	0.49	2.34	7	5.93	2.08	0.83	2.83	3.65	2.35	2.34	0.36	1.28	0.24
2015	[19795] ISHIZUKA O. (2015)	samp. 09022507-1	IZU-BONIN ARC / IZU ARC / IZU-OSHIMA / OSHIMA / PACIFIC OCEAN	VOLCANIC ROCK	BASALT	3	Arc	WHOLE ROCK	1.16	6952.45		598	24	46.6	0.49	2.55	7.26	6.33	2.26	0.81	3.14	3.75	2.49	2.42	0.38	1.4	0.25
2015	[19795] ISHIZUKA O. (2015)	samp. 09022512	IZU-BONIN ARC / IZU ARC / IZU-OSHIMA / OSHIMA / PACIFIC OCEAN	VOLCANIC ROCK	BASALT	3	Arc	WHOLE ROCK	1.16	6952.45		537.72	26.55	49.78	0.51	2.49	7.31	6.65	2.38	0.82	3.38	3.99	2.66	2.56	0.42	1.48	0.27
2015	[19795] ISHIZUKA O. (2015)	samp. 10012003	IZU-BONIN ARC / IZU ARC / IZU-OSHIMA / OSHIMA / PACIFIC OCEAN	VOLCANIC ROCK	BASALT	3	Arc	WHOLE ROCK	1.16	6952.45		502.88	26.55	48.98	0.56	2.75	7.84	7.01	2.47	0.86	3.41	4.24	2.73	2.76	0.41	1.53	0.26
2015	[19795] ISHIZUKA O. (2015)	samp. 11020101	IZU-BONIN ARC / IZU ARC / IZU-OSHIMA / OSHIMA / PACIFIC OCEAN	VOLCANIC ROCK	BASALT	3	Arc	WHOLE ROCK	1.16	6952.45		476.78	29.24	58.44	0.67	3.02	8.87	8.06	2.72	0.97	3.91	4.7	3.13	3.06	0.47	1.84	0.33
2015	[19795] ISHIZUKA O. (2015)	samp. 09102102	IZU-BONIN ARC / IZU ARC / IZU-OSHIMA / OSHIMA / PACIFIC OCEAN	VOLCANIC ROCK	BASALT	3	Arc	WHOLE ROCK	1.17	7012.38		517	22	42.9	0.4	1.72	5.68	4.94	1.85	0.71	2.64	3.42	2.29	2.26	0.36	1.24	0.19
2015	[19795] ISHIZUKA O. (2015)	samp. 11122601	IZU-BONIN ARC / IZU ARC / IZU-OSHIMA / OSHIMA / PACIFIC OCEAN	VOLCANIC ROCK	BASALT	3	Arc	WHOLE ROCK	1.17	7012.38		566.34	24.03	42.84	0.38	2.02	6.16	5.7	2.08	0.8	2.94	3.74	2.51	2.35	0.39	1.29	0.2
2015	[19795] ISHIZUKA O. (2015)	samp. 11122802-2	IZU-BONIN ARC / IZU ARC / IZU-OSHIMA / OSHIMA / PACIFIC OCEAN	VOLCANIC ROCK	BASALT	3	Arc	WHOLE ROCK	1.17	7012.38		530.17	23.05	40.92	0.37	1.92	5.81	5.5	1.97	0.75	2.89	3.68	2.36	2.36	0.37	1.3	0.18
2015	[19795] ISHIZUKA O. (2015)	samp. 09022516	IZU-BONIN ARC / IZU ARC / IZU-OSHIMA / OSHIMA / PACIFIC OCEAN	VOLCANIC ROCK	BASALT	3	Arc	WHOLE ROCK	1.17	7012.38		529.34	23.83	44.31	0.44	2.27	6.71	6.03	2.14	0.82	2.96	3.7	2.42	2.4	0.37	1.36	0.24
2015	[19795] ISHIZUKA O. (2015)	samp. 09022508	IZU-BONIN ARC / IZU ARC / IZU-OSHIMA / OSHIMA / PACIFIC OCEAN	VOLCANIC ROCK	BASALT	3	Arc	WHOLE ROCK	1.17	7012.38		566	24.1	45.6	0.5	2.52	7.21	6.47	2.31	0.83	3.19	3.77	2.49	2.43	0.37	1.46	0.25
2015	[19795] ISHIZUKA O. (2015)	samp. 09102204-2	IZU-BONIN ARC / IZU ARC / IZU-OSHIMA / OSHIMA / PACIFIC OCEAN	VOLCANIC ROCK	BASALT	3	Arc	WHOLE ROCK	1.17	7012.38		557.69	23	44.78	0.4	2.25	6.57	5.94	2.19	0.81	2.99	3.79	2.53	2.5	0.38	1.3	0.21
2015	[19795] ISHIZUKA O. (2015)	samp. 11020111	IZU-BONIN ARC / IZU ARC / IZU-OSHIMA / OSHIMA / PACIFIC OCEAN	VOLCANIC ROCK	BASALT	3	Arc	WHOLE ROCK	1.17	7012.38		582.69	25.23	45.18	0.5	2.39	7.04	6.29	2.17	0.84	3.25	3.83	2.56	2.5	0.38	1.41	0.25
2015	[19795] ISHIZUKA O. (2015)	samp. 09102204-1	IZU-BONIN ARC / IZU ARC / IZU-OSHIMA / OSHIMA / PACIFIC OCEAN	VOLCANIC ROCK	BASALT	3	Arc	WHOLE ROCK	1.17	7012.38		541.05	23.8	44.54	0.41	2.3	6.77	5.86	2.22	0.81	3.12	3.79	2.51	2.53	0.39	1.31	0.21
2015	[19795] ISHIZUKA O. (2015)	samp. 09102202	IZU-BONIN ARC / IZU ARC / IZU-OSHIMA / OSHIMA / PACIFIC OCEAN	VOLCANIC ROCK	BASALT	3	Arc	WHOLE ROCK	1.17	7012.38		548.43	23.59	44.95	0.42	2.26	6.56	5.94	2.1	0.82	3.04	3.79	2.53	2.55	0.38	1.32	0.21
2015	[19795] ISHIZUKA O. (2015)	samp. 09102206	IZU-BONIN ARC / IZU ARC / IZU-OSHIMA / OSHIMA / PACIFIC OCEAN	VOLCANIC ROCK	BASALT	3	Arc	WHOLE ROCK	1.17	7012.38		567.57	23.55	43.98	0.41	2.27	6.87	5.95	2.1	0.82	3.18	3.8	2.51	2.56	0.4	1.34	0.22
2015	[19795] ISHIZUKA O. (2015)	samp. 09102203	IZU-BONIN ARC / IZU ARC / IZU-OSHIMA / OSHIMA / PACIFIC OCEAN	VOLCANIC ROCK	BASALT	3	Arc	WHOLE ROCK	1.17	7012.38		546.08	23.84	44.86	0.42	2.27	6.68	5.88	2.28	0.82	3.22	3.87	2.52	2.62	0.41	1.34	0.23
2015	[19795] ISHIZUKA O. (2015)	samp. 10012203	IZU-BONIN ARC / IZU ARC / IZU-OSHIMA / OSHIMA / PACIFIC OCEAN	VOLCANIC ROCK	BASALT	3	Arc	WHOLE ROCK	1.18	7072.32		571.44	21.8	45.63	0.61	2.91	8.26	6.89	2.33	0.84	3.05	3.72	2.39	2.35	0.36	1.39	0.27
2015	[19795] ISHIZUKA O. (2015)	samp. 10012201SP2	IZU-BONIN ARC / IZU ARC / IZU-OSHIMA / OSHIMA / PACIFIC OCEAN	VOLCANIC ROCK	BASALT	3	Arc	WHOLE ROCK	1.19	7132.25		572.69	22.85	45.93	0.51	2.45	7.24	6.24	2.2	0.8	3.01	3.75	2.45	2.37	0.36	1.38	0.27
2015	[19795] ISHIZUKA O. (2015)	samp. 04120707S2L	IZU-BONIN ARC / IZU ARC / IZU-OSHIMA / OSHIMA / PACIFIC OCEAN	VOLCANIC ROCK	BASALT	3	Arc	WHOLE ROCK	1.19	7132.25		555.4	23.01	44.55	0.47	2.38	6.96	6.43	2.24	0.81	3.23	3.84	2.51	2.48	0.4	1.38	0.26
2015	[19795] ISHIZUKA O. (2015)	samp. 11020204-3	IZU-BONIN ARC / IZU ARC / IZU-OSHIMA / OSHIMA / PACIFIC OCEAN	VOLCANIC ROCK	BASALT	3	Arc	WHOLE ROCK	1.19	7132.25		573.73	24.55	44.64	0.48	2.38	6.78	6.14	2.18	0.82	3.2	3.89	2.5	2.48	0.38	1.4	0.245
2015	[19795] ISHIZUKA O. (2015)	samp. 09102210	IZU-BONIN ARC / IZU ARC / IZU-OSHIMA / OSHIMA / PACIFIC OCEAN	VOLCANIC ROCK	BASALT	3	Arc	WHOLE ROCK	1.19	7132.25		542.83	23.23	53.18	0.86	3.65	9.78	7.58	2.52	0.92	3.49	3.77	2.45	2.49	0.38	1.49	0.32
2015	[19795] ISHIZUKA O. (2015)	samp. 11020204-4	IZU-BONIN ARC / IZU ARC / IZU-OSHIMA / OSHIMA / PACIFIC OCEAN	VOLCANIC ROCK	BASALT	3	Arc	WHOLE ROCK	1.19	7132.25		570.87	24.39	44.15	0.49	2.2	6.68	6.06	2.16	0.83	3.19	3.88	2.55	2.53	0.38	1.44	0.24
2015	[19795] ISHIZUKA O. (2015)	samp. 09022310	IZU-BONIN ARC / IZU ARC / IZU-OSHIMA / OSHIMA / PACIFIC OCEAN	VOLCANIC ROCK	BASALT	3	Arc	WHOLE ROCK	1.2	7192.19		629	24.5	45.6	0.55	2.39	7.14	6.25	2.29	0.86	3.03	3.76	2.44	2.39	0.38	1.34	0.28
2015	[19795] ISHIZUKA O. (2015)	samp. 09102213-1	IZU-BONIN ARC / IZU ARC / IZU-OSHIMA / OSHIMA / PACIFIC OCEAN	VOLCANIC ROCK	BASALT	3	Arc	WHOLE ROCK	1.2	7192.19		548.85	23.57	53	0.9	3.5	9.44	7.51	2.37	0.91	3.24	3.64	2.36	2.43	0.37	1.47	0.32
2015	[19795] ISHIZUKA O. (2015)	samp. 10012106	IZU-BONIN ARC / IZU ARC / IZU-OSHIMA / OSHIMA / PACIFIC OCEAN	VOLCANIC ROCK	BASALT	3	Arc	WHOLE ROCK	1.2	7192.19		611.05	23.52	42.13	0.49	2.37	7.04	6.13	2.18	0.82	2.99	3.82	2.49	2.47	0.38	1.35	0.23
2015	[19795] ISHIZUKA O. (2015)	samp. 10012004	IZU-BONIN ARC / IZU ARC / IZU-OSHIMA / OSHIMA / PACIFIC OCEAN	VOLCANIC ROCK	BASALT	3	Arc	WHOLE ROCK	1.2	7192.19		559.11	24.11	44.63	0.49	2.37	7.26	6.34	2.28	0.85	3.02	3.81	2.6	2.52	0.4	1.36	0.23
2015	[19795] ISHIZUKA O. (2015)	samp. 11020202-2	IZU-BONIN ARC / IZU ARC / IZU-OSHIMA / OSHIMA / PACIFIC OCEAN	VOLCANIC ROCK	BASALT	3	Arc	WHOLE ROCK	1.2	7192.19		570.41	24.77	45.38	0.49	2.35	6.97	6.28	2.23	0.83	3.29	3.9	2.58	2.59	0.42	1.37	0.25
2015	[19795] ISHIZUKA O. (2015)	samp. 09102213-2	IZU-BONIN ARC / IZU ARC / IZU-OSHIMA / OSHIMA / PACIFIC OCEAN	VOLCANIC ROCK	BASALT	3	Arc	WHOLE ROCK	1.2	7192.19		556.81	25.09	54.73	0.88	3.99	10.66	8.42	2.7	0.98	3.58	4.01	2.69	2.63	0.4	1.55	0.33
2015	[19795] ISHIZUKA O. (2015)	samp. 09022514	IZU-BONIN ARC / IZU ARC / IZU-OSHIMA / OSHIMA / PACIFIC OCEAN	VOLCANIC ROCK	BASALT	3	Arc	WHOLE ROCK	1.2	7192.19		475.46	29.78	58.89	0.6	2.99	8.84	7.84	2.7	0.92	3.84	4.53	2.99	2.94	0.44	1.73	0.31
2015	[19795] ISHIZUKA O. (2015)	samp. 09022312	IZU-BONIN ARC / IZU ARC / IZU-OSHIMA / OSHIMA / PACIFIC OCEAN	VOLCANIC ROCK	BASALT	3	Arc	WHOLE ROCK	1.21	7252.12		619	24.6	44.8	0.56	2.36	6.96	6.29	2.2	0.82	3.11	3.69	2.48	2.45	0.37	1.35	0.27
2015	[19795] ISHIZUKA O. (2015)	samp. 09022412	IZU-BONIN ARC / IZU ARC / IZU-OSHIMA / OSHIMA / PACIFIC OCEAN	VOLCANIC ROCK	BASALT	3	Arc	WHOLE ROCK	1.21	7252.12		587.03	25.01	45.73	0.51	2.2	6.7	6.11	2.23	0.8	3.02	3.77	2.51	2.49	0.38	1.37	0.25
2015	[19795] ISHIZUKA O. (2015)	samp. 09102106	IZU-BONIN ARC / IZU ARC / IZU-OSHIMA / OSHIMA / PACIFIC OCEAN	VOLCANIC ROCK	BASALT	3	Arc	WHOLE ROCK	1.21	7252.12		607.68	26.14	46.47	0.53	2.38	7.25	6.33	2.43	0.88	3.15	3.94	2.61	2.57	0.39	1.42	0.24
2015	[19795] ISHIZUKA O. (2015)	samp. 09022507-2	IZU-BONIN ARC / IZU ARC / IZU-OSHIMA / OSHIMA / PACIFIC OCEAN	VOLCANIC ROCK	BASALT	3	Arc	WHOLE ROCK	1.21	7252.12		586	24.7	48.2	0.56	2.67	7.7	6.73	2.42	0.85	3.33	3.93	2.6	2.59	0.39	1.47	0.27
2015	[19795] ISHIZUKA O. (2015)	samp. 09102302	IZU-BONIN ARC / IZU ARC / IZU-OSHIMA / OSHIMA / PACIFIC OCEAN	VOLCANIC ROCK	BASALT	3	Arc	WHOLE ROCK	1.21	7252.12		604.39	26.03	45.35	0.48	2.32	7.06	6.36	2.33	0.96	3.15	4.01	2.66	2.64	0.41	1.34	0.23
2015	[19795] ISHIZUKA O. (2015)	samp. 10012108	IZU-BONIN ARC / IZU ARC / IZU-OSHIMA / OSHIMA / PACIFIC OCEAN	VOLCANIC ROCK	BASALT	3	Arc	WHOLE ROCK	1.22	7312.06		537.93	22.1	50.49	0.91	3.35	9.45	7.4	2.35	0.88	3	3.72	2.37	2.36	0.36	1.5	0.34
2015	[19795] ISHIZUKA O. (2015)	samp. 09022510-1	IZU-BONIN ARC / IZU ARC / IZU-OSHIMA / OSHIMA / PACIFIC OCEAN	VOLCANIC ROCK	BASALT	3	Arc	WHOLE ROCK	1.22	7312.06		578.61	26.56	47.02	0.45	2.39	7	6.39	2.21	0.86	3.41	3.97	2.6	2.55	0.41	1.46	0.24
2015	[19795] ISHIZUKA O. (2015)	samp. 09102209	IZU-BONIN ARC / IZU ARC / IZU-OSHIMA / OSHIMA / PACIFIC OCEAN	VOLCANIC ROCK	BASALT	3	Arc	WHOLE ROCK	1.22	7312.06		533.76	23.89	55.16	0.85	3.75	10.39	7.79	2.61	1.02	3.34	3.9	2.55	2.56	0.38	1.55	0.33
2015	[19795] ISHIZUKA O. (2015)	samp. 09102214	IZU-BONIN ARC / IZU ARC / IZU-OSHIMA / OSHIMA / PACIFIC OCEAN	VOLCANIC ROCK	BASALT	3	Arc	WHOLE ROCK	1.22	7312.06		562.21	28.06	54.02	0.95	4.04	11.25	8.72	2.75	0.93	3.32	4.06	2.6	2.59	0.4	1.5	0.32
2015	[19795] ISHIZUKA O. (2015)	samp. 10012005	IZU-BONIN ARC / IZU ARC / IZU-OSHIMA / OSHIMA / PACIFIC OCEAN	VOLCANIC ROCK	BASALT	3	Arc	WHOLE ROCK	1.22	7312.06		627.04	25.56	47.7	0.6	2.78	7.94	6.98	2.43	0.85	3.2	3.95	2.61	2.63	0.4	1.42	0.26
2015	[19795] ISHIZUKA O. (2015)	samp. 09102104	IZU-BONIN ARC / IZU ARC / IZU-OSHIMA / OSHIMA / PACIFIC OCEAN	VOLCANIC ROCK	BASALT	3	Arc	WHOLE ROCK	1.22	7312.06		599.45	25.16	45.6	0.53	2.42	7.12	6.5	2.32	0.83	3.31	4.02	2.62	2.65	0.41	1.48	0.26
2015	[19795] ISHIZUKA O. (2015)	samp. 09022510-3	IZU-BONIN ARC / IZU ARC / IZU-OSHIMA / OSHIMA / PACIFIC OCEAN	VOLCANIC ROCK	BASALT	3	Arc	WHOLE ROCK	1.22	7312.06		522.77	26.53	49.44	0.54	2.45	7.25	6.62	2.37	0.87	3.44	4.15	2.64	2.67	0.42	1.48	0.27
2015	[19795] ISHIZUKA O. (2015)	samp. 09102119	IZU-BONIN ARC / IZU ARC / IZU-OSHIMA / OSHIMA / PACIFIC OCEAN	VOLCANIC ROCK	BASALT	3	Arc	WHOLE ROCK	1.22	7312.06		526.64	28.62	50.3	0.56	2.54	7.58	6.88	2.44	0.86	3.47	4.27	2.83	2.91	0.45	1.57	0.26
2015	[19795] ISHIZUKA O. (2015)	samp. 10012002	IZU-BONIN ARC / IZU ARC / IZU-OSHIMA / OSHIMA / PACIFIC OCEAN	VOLCANIC ROCK	BASALT	3	Arc	WHOLE ROCK	1.22	7312.06		435.2	30.98	61.76	0.7	3.22	9.42	8.3	2.87	0.94	3.88	4.72	3.17	3.07	0.48	1.88	0.33
2015	[19795] ISHIZUKA O. (2015)	samp. 09102215	IZU-BONIN ARC / IZU ARC / IZU-OSHIMA / OSHIMA / PACIFIC OCEAN	VOLCANIC ROCK	BASALT	3	Arc	WHOLE ROCK	1.23	7371.99		605	25.9	47.3	0.57	2.48	7.29	6.44	2.32	0.84	3.05	3.88	2.55	2.51	0.38	1.42	0.25
2015	[19795] ISHIZUKA O. (2015)	samp. 09102124	IZU-BONIN ARC / IZU ARC / IZU-OSHIMA / OSHIMA / PACIFIC OCEAN	VOLCANIC ROCK	BASALT	3	Arc	WHOLE ROCK	1.23	7371.99		596	24.8	44.8	0.46	2.36	6.71	5.77	2.14	0.82	3.06	3.88	2.44	2.52	0.38	1.31	0.22
2015	[19795] ISHIZUKA O. (2015)	samp. 09022418	IZU-BONIN ARC / IZU ARC / IZU-OSHIMA / OSHIMA / PACIFIC OCEAN	VOLCANIC ROCK	BASALT	3	Arc	WHOLE ROCK	1.23	7371.99		542.57	25.35	47.86	0.5	2.52	7.14	6.53	2.26	0.83	3.34	3.92	2.68	2.56	0.39	1.48	0.25
2015	[19795] ISHIZUKA O. (2015)	samp. 11020202-1	IZU-BONIN ARC / IZU ARC / IZU-OSHIMA / OSHIMA / PACIFIC OCEAN	VOLCANIC ROCK	BASALT	3	Arc	WHOLE ROCK	1.23	7371.99		580.1	25.36	46.41	0.51	2.4	7.06	6.49	2.28	0.84	3.31	4.12	2.68	2.57	0.39	1.47	0.26
2015	[19795] ISHIZUKA O. (2015)	samp. 09102109	IZU-BONIN ARC / IZU ARC / IZU-OSHIMA / OSHIMA / PACIFIC OCEAN	VOLCANIC ROCK	BASALT	3	Arc	WHOLE ROCK	1.23	7371.99		543.78	31.31	59.22	0.66	3	8.65	7.75	2.64	0.98	3.76	4.67	3.11	3.04	0.48	1.72	0.32
2015	[19795] ISHIZUKA O. (2015)	samp. 09102123	IZU-BONIN ARC / IZU ARC / IZU-OSHIMA / OSHIMA / PACIFIC OCEAN	VOLCANIC ROCK	BASALT	3	Arc	WHOLE ROCK	1.23	7371.99		530.16	28.42	51.84	0.5	2.53	7.53	6.69	2.49	0.94	3.55	4.47	3	3.07	0.47	1.6	0.25
2015	[19795] ISHIZUKA O. (2015)	samp. 09102118-2	IZU-BONIN ARC / IZU ARC / IZU-OSHIMA / OSHIMA / PACIFIC OCEAN	VOLCANIC ROCK	BASALT	3	Arc	WHOLE ROCK	1.24	7431.93		600	24.6	44.6	0.52	2.29	7.05	5.93	2.07	0.74	2.96	3.65	2.43	2.39	0.35	1.31	0.23
2015	[19795] ISHIZUKA O. (2015)	samp. 09102118-1	IZU-BONIN ARC / IZU ARC / IZU-OSHIMA / OSHIMA / PACIFIC OCEAN	VOLCANIC ROCK	BASALT	3	Arc	WHOLE ROCK	1.24	7431.93		599	25.1	44.5	0.55	2.36	7.06	6.16	2.13	0.8	3.06	3.85	2.56	2.43	0.37	1.37	0.24
2015	[19795] ISHIZUKA O. (2015)	samp. 09102121	IZU-BONIN ARC / IZU ARC / IZU-OSHIMA / OSHIMA / PACIFIC OCEAN	VOLCANIC ROCK	BASALT	3	Arc	WHOLE ROCK	1.25	7491.86		616.84	26.29	48.41	0.61	2.61	7.64	6.54	2.2	0.82	3.09	3.88	2.51	2.51	0.38	1.34	0.27
2015	[19795] ISHIZUKA O. (2015)	samp. 10012105	IZU-BONIN ARC / IZU ARC / IZU-OSHIMA / OSHIMA / PACIFIC OCEAN	VOLCANIC ROCK	BASALT	3	Arc	WHOLE ROCK	1.25	7491.86		603.25	24.8	46.65	0.5	2.43	7.16	6.45	2.32	0.89	3.17	3.96	2.69	2.6	0.4	1.45	0.24
2015	[19795] ISHIZUKA O. (2015)	samp. 09022502	IZU-BONIN ARC / IZU ARC / IZU-OSHIMA / OSHIMA / PACIFIC OCEAN	VOLCANIC ROCK	BASALT	3	Arc	WHOLE ROCK	1.26	7551.8		624.18	26.02	46.34	0.46	2.31	6.8	6.39	2.29	0.85	3.33	3.97	2.65	2.68	0.4	1.4	0.24
2015	[19795] ISHIZUKA O. (2015)	samp. 09102201	IZU-BONIN ARC / IZU ARC / IZU-OSHIMA / OSHIMA / PACIFIC OCEAN	VOLCANIC ROCK	BASALT	3	Arc	WHOLE ROCK	1.26	7551.8		610.39	25.77	47.31	0.42	2.37	7.09	6.3	2.36	0.87	3.35	4.03	2.75	2.73	0.44	1.43	0.22
2015	[19795] ISHIZUKA O. (2015)	samp. 09022303	IZU-BONIN ARC / IZU ARC / IZU-OSHIMA / OSHIMA / PACIFIC OCEAN	VOLCANIC ROCK	BASALT	3	Arc	WHOLE ROCK	1.27	7611.73		636	25	47.3	0.54	2.42	6.93	6.36	2.23	0.84	3.24	3.94	2.52	2.49	0.4	1.42	0.27
2015	[19795] ISHIZUKA O. (2015)	samp. 09022304-2	IZU-BONIN ARC / IZU ARC / IZU-OSHIMA / OSHIMA / PACIFIC OCEAN	VOLCANIC ROCK	BASALT	3	Arc	WHOLE ROCK	1.27	7611.73		662.59	25.9	47.87	0.57	2.49	7.21	6.75	2.23	0.87	3.33	4	2.59	2.57	0.4	1.44	0.27
2015	[19795] ISHIZUKA O. (2015)	samp. 09102113	IZU-BONIN ARC / IZU ARC / IZU-OSHIMA / OSHIMA / PACIFIC OCEAN	VOLCANIC ROCK	BASALT	3	Arc	WHOLE ROCK	1.27	7611.73		608	26.3	46.2	0.52	2.3	6.94	6.15	2.19	0.82	3.16	3.98	2.64	2.6	0.41	1.38	0.23
2015	[19795] ISHIZUKA O. (2015)	samp. 10070101-1	IZU-BONIN ARC / IZU ARC / IZU-OSHIMA / OSHIMA / PACIFIC OCEAN	VOLCANIC ROCK	BASALT	3	Arc	WHOLE ROCK	1.28	7671.67		606.37	25.09	48.43	0.44	2.32	6.85	6.33	2.32	0.84	3.21	4.09	2.69	2.7	0.41	1.44	0.23
2015	[19795] ISHIZUKA O. (2015)	samp. 10070101-2	IZU-BONIN ARC / IZU ARC / IZU-OSHIMA / OSHIMA / PACIFIC OCEAN	VOLCANIC ROCK	BASALT	3	Arc	WHOLE ROCK	1.29	7731.6		605.73	25.71	47.91	0.44	2.34	6.81	6.23	2.24	0.85	3.2	4.01	2.69	2.62	0.41	1.43	0.23
2015	[19795] ISHIZUKA O. (2015)	samp. 09102309	IZU-BONIN ARC / IZU ARC / IZU-OSHIMA / OSHIMA / PACIFIC OCEAN	VOLCANIC ROCK	BASALT	3	Arc	WHOLE ROCK	1.29	7731.6		635.69	27.09	46.08	0.39	2.12	6.6	6.33	2.35	0.84	3.18	4.04	2.68	2.63	0.41	1.4	0.21
2015	[19795] ISHIZUKA O. (2015)	samp. 09102217	IZU-BONIN ARC / IZU ARC / IZU-OSHIMA / OSHIMA / PACIFIC OCEAN	VOLCANIC ROCK	BASALT	3	Arc	WHOLE ROCK	1.29	7731.6		752	26.8	49.9	0.64	2.94	8.36	7.14	2.5	0.89	3.27	4.14	2.73	2.63	0.41	1.51	0.29
2015	[19795] ISHIZUKA O. (2015)	samp. 09102216	IZU-BONIN ARC / IZU ARC / IZU-OSHIMA / OSHIMA / PACIFIC OCEAN	VOLCANIC ROCK	BASALT	3	Arc	WHOLE ROCK	1.3	7791.54		644	25.9	49.2	0.62	2.87	8.3	6.92	2.37	0.86	3.09	4.03	2.55	2.5	0.39	1.42	0.27
2015	[19795] ISHIZUKA O. (2015)	samp. 09102205	IZU-BONIN ARC / IZU ARC / IZU-OSHIMA / OSHIMA / PACIFIC OCEAN	VOLCANIC ROCK	BASALT	3	Arc	WHOLE ROCK	1.3	7791.54		623.6	26.31	48.72	0.44	2.37	7.13	6.4	2.38	0.9	3.42	4.23	2.79	2.83	0.43	1.43	0.23
2015	[19795] ISHIZUKA O. (2015)	samp. 09022513	IZU-BONIN ARC / IZU ARC / IZU-OSHIMA / OSHIMA / PACIFIC OCEAN	VOLCANIC ROCK	BASALT	3	Arc	WHOLE ROCK	1.31	7851.47		572.38	24.73	45.53	0.44	2.26	6.72	6.26	2.23	0.86	3.22	3.92	2.62	2.55	0.41	1.46	0.26
2015	[19795] ISHIZUKA O. (2015)	samp. 09022304-1	IZU-BONIN ARC / IZU ARC / IZU-OSHIMA / OSHIMA / PACIFIC OCEAN	VOLCANIC ROCK	BASALT	3	Arc	WHOLE ROCK	1.31	7851.47		601.19	25.51	47.47	0.54	2.46	7.35	6.59	2.4	0.85	3.16	3.96	2.6	2.56	0.41	1.45	0.27
2015	[19795] ISHIZUKA O. (2015)	samp. 09122102-1	IZU-BONIN ARC / IZU ARC / IZU-OSHIMA / OSHIMA / PACIFIC OCEAN	VOLCANIC ROCK	BASALT	3	Arc	WHOLE ROCK	1.32	7911.41		660	27.2	47.3	0.39	2.15	6.77	6.37	2.41	0.87	3.32	4.17	2.75	2.67	0.42	1.44	0.21
2015	[19795] ISHIZUKA O. (2015)	samp. 09102303	IZU-BONIN ARC / IZU ARC / IZU-OSHIMA / OSHIMA / PACIFIC OCEAN	VOLCANIC ROCK	BASALT	3	Arc	WHOLE ROCK	1.33	7971.34		633.52	27.06	47.88	0.5	2.43	7.3	6.68	2.36	0.96	3.22	4.1	2.74	2.68	0.4	1.44	0.25
2015	[19795] ISHIZUKA O. (2015)	samp. 11122704-2	IZU-BONIN ARC / IZU ARC / IZU-OSHIMA / OSHIMA / PACIFIC OCEAN	VOLCANIC ROCK	BASALT	3	Arc	WHOLE ROCK	1.35	8091.21		529	24.7	66.6	1.33	4.38	12.5	8.75	2.53	0.97	3.13	3.9	2.51	2.45	0.37	1.91	0.46
2015	[19795] ISHIZUKA O. (2015)	samp. 09122102-3	IZU-BONIN ARC / IZU ARC / IZU-OSHIMA / OSHIMA / PACIFIC OCEAN	VOLCANIC ROCK	BASALT	3	Arc	WHOLE ROCK	1.35	8091.21		655	27.3	48.4	0.41	2.15	6.74	6.46	2.37	0.85	3.3	4.19	2.76	2.7	0.42	1.46	0.22
2015	[19795] ISHIZUKA O. (2015)	samp. 11122704-1	IZU-BONIN ARC / IZU ARC / IZU-OSHIMA / OSHIMA / PACIFIC OCEAN	VOLCANIC ROCK	BASALT	3	Arc	WHOLE ROCK	1.35	8091.21		512.38	25.79	68.69	1.36	4.63	13.55	9.71	2.87	1.01	3.46	4.21	2.74	2.71	0.43	1.99	0.5
2015	[19795] ISHIZUKA O. (2015)	samp. 09122102-2	IZU-BONIN ARC / IZU ARC / IZU-OSHIMA / OSHIMA / PACIFIC OCEAN	VOLCANIC ROCK	BASALT	3	Arc	WHOLE ROCK	1.35	8091.21		651	28.6	49	0.44	2.24	7.01	6.63	2.43	0.9	3.42	4.27	2.86	2.8	0.44	1.46	0.22
2015	[19795] ISHIZUKA O. (2015)	samp. 09022313-1	IZU-BONIN ARC / IZU ARC / IZU-OSHIMA / OSHIMA / PACIFIC OCEAN	VOLCANIC ROCK	BASALT	3	Arc	WHOLE ROCK	1.36	8151.15		639	28.1	52.9	0.59	2.7	7.93	7.23	2.52	0.89	3.41	4.28	2.78	2.77	0.42	1.55	0.31
2015	[19795] ISHIZUKA O. (2015)	samp. 09102117	IZU-BONIN ARC / IZU ARC / IZU-OSHIMA / OSHIMA / PACIFIC OCEAN	VOLCANIC ROCK	BASALT	3	Arc	WHOLE ROCK	1.37	8211.08		560.43	24.75	55.51	0.94	3.31	9.48	7.67	2.44	1	3.4	3.99	2.6	2.69	0.39	1.61	0.35
2015	[19795] ISHIZUKA O. (2015)	samp. 11122704-3	IZU-BONIN ARC / IZU ARC / IZU-OSHIMA / OSHIMA / PACIFIC OCEAN	VOLCANIC ROCK	BASALT	3	Arc	WHOLE ROCK	1.38	8271.01		525	22.8	68.6	1.29	3.91	11.7	7.54	2.28	0.87	2.81	3.62	2.26	2.34	0.35	1.89	0.45
2015	[19795] ISHIZUKA O. (2015)	samp. 09022510-2	IZU-BONIN ARC / IZU ARC / IZU-OSHIMA / OSHIMA / PACIFIC OCEAN	VOLCANIC ROCK	BASALT	3	Arc	WHOLE ROCK	1.38	8271.01		449.94	34.15	64.76	0.68	3.28	9.45	8.73	3.01	1.04	4.4	5.3	3.35	3.37	0.52	1.97	0.34
2015	[19795] ISHIZUKA O. (2015)	samp. 09022313-2	IZU-BONIN ARC / IZU ARC / IZU-OSHIMA / OSHIMA / PACIFIC OCEAN	VOLCANIC ROCK	BASALT	3	Arc	WHOLE ROCK	1.4	8390.88		679	28	51.7	0.57	2.7	7.92	7.28	2.53	0.93	3.69	4.27	2.87	2.84	0.45	1.58	0.31
2015	[19795] ISHIZUKA O. (2015)	samp. 09022302	IZU-BONIN ARC / IZU ARC / IZU-OSHIMA / OSHIMA / PACIFIC OCEAN	VOLCANIC ROCK	BASALT	3	Arc	WHOLE ROCK	1.42	8510.75		680	28.6	53.1	0.57	2.85	8.29	7.6	2.67	0.94	3.66	4.61	2.98	2.88	0.46	1.68	0.29
2014	[20107] ISHIZUKA O. (2014)	samp. R07	IZU-BONIN ARC / IZU ARC / IZU-TOBU / IZU-TOBU / PACIFIC OCEAN	VOLCANIC ROCK	BASALT	3	Arc	WHOLE ROCK	0.83	4974.6		250	19.7	60.3	1.67	5.59	14.5	10.3	2.82	1.02	3.21	3.24	2.04	1.89	0.3	1.58	0.41
2014	[20107] ISHIZUKA O. (2014)	samp. 2	IZU-BONIN ARC / IZU ARC / IZU-OSHIMA / OSHIMA / DREDGE 23 / PACIFIC OCEAN	VOLCANIC ROCK	BASALT	3	Arc	WHOLE ROCK	0.87	5214.34		484	18.3	34	0.43	1.78	4.99	4.47	1.56	0.58	2.05	2.72	1.72	1.73	0.26	0.95	0.19
2014	[20107] ISHIZUKA O. (2014)	samp. 3	IZU-BONIN ARC / IZU ARC / IZU-OSHIMA / OSHIMA / DREDGE 23 / PACIFIC OCEAN	VOLCANIC ROCK	BASALT	3	Arc	WHOLE ROCK	0.89	5334.21		458	19	34.2	0.37	1.88	5.3	4.58	1.55	0.58	2.09	2.73	1.75	1.78	0.27	0.91	0.2
2014	[20107] ISHIZUKA O. (2014)	samp. 1	IZU-BONIN ARC / IZU ARC / IZU-OSHIMA / OSHIMA / DREDGE 23 / PACIFIC OCEAN	VOLCANIC ROCK	BASALT	3	Arc	WHOLE ROCK	0.9	5394.14		444	18.4	34.3	0.39	1.87	5.49	4.76	1.56	0.59	2.05	2.75	1.8	1.77	0.27	0.96	0.18
2014	[20107] ISHIZUKA O. (2014)	samp. 1	IZU-BONIN ARC / IZU ARC / IZU-OSHIMA / OSHIMA / DREDGE 24 / PACIFIC OCEAN	VOLCANIC ROCK	BASALT	3	Arc	WHOLE ROCK	0.9	5394.14		471	18.1	34.7	0.39	1.79	5.22	4.7	1.62	0.61	2.15	2.77	1.76	1.78	0.28	0.96	0.19
2014	[20107] ISHIZUKA O. (2014)	samp. 5	IZU-BONIN ARC / IZU ARC / IZU-OSHIMA / OSHIMA / DREDGE 24 / PACIFIC OCEAN	VOLCANIC ROCK	BASALT	3	Arc	WHOLE ROCK	0.91	5454.08		436	19.3	35.7	0.41	1.86	5.35	4.69	1.7	0.62	2.15	2.83	1.88	1.83	0.28	0.98	0.2
2014	[20107] ISHIZUKA O. (2014)	samp. 4	IZU-BONIN ARC / IZU ARC / IZU-OSHIMA / OSHIMA / DREDGE 24 / PACIFIC OCEAN	VOLCANIC ROCK	BASALT	3	Arc	WHOLE ROCK	0.91	5454.08		445	19	35.6	0.4	1.85	5.42	4.64	1.64	0.63	2.12	2.75	1.88	1.85	0.29	1.01	0.21
2014	[20107] ISHIZUKA O. (2014)	samp. 3	IZU-BONIN ARC / IZU ARC / IZU-OSHIMA / OSHIMA / DREDGE 24 / PACIFIC OCEAN	VOLCANIC ROCK	BASALT	3	Arc	WHOLE ROCK	0.94	5633.88		490	19.4	36.1	0.39	1.96	5.71	4.9	1.73	0.67	2.23	2.9	1.9	1.89	0.29	1.01	0.19
2014	[20107] ISHIZUKA O. (2014)	samp. 2	IZU-BONIN ARC / IZU ARC / IZU-OSHIMA / OSHIMA / DREDGE 24 / PACIFIC OCEAN	VOLCANIC ROCK	BASALT	3	Arc	WHOLE ROCK	0.95	5693.81		460	19.2	34.9	0.38	1.79	5.27	4.7	1.58	0.56	2.11	2.71	1.76	1.77	0.27	0.93	0.19
2014	[20107] ISHIZUKA O. (2014)	samp. 6	IZU-BONIN ARC / IZU ARC / IZU-OSHIMA / OSHIMA / DREDGE 24 / PACIFIC OCEAN	VOLCANIC ROCK	BASALT	3	Arc	WHOLE ROCK	0.95	5693.81		442	19.8	36.7	0.47	1.93	5.5	4.98	1.73	0.69	2.32	3.09	2	1.97	0.31	1.06	0.2
2014	[20107] ISHIZUKA O. (2014)	samp. R14	IZU-BONIN ARC / IZU ARC / IZU-OSHIMA / OSHIMA / PACIFIC OCEAN	VOLCANIC ROCK	BASALT	3	Arc	WHOLE ROCK	0.97	5813.68		497	20	38.5	0.46	1.99	5.97	5.11	1.75	0.72	2.35	2.97	1.89	1.86	0.28	1.06	0.2
2014	[20107] ISHIZUKA O. (2014)	samp. R08	IZU-BONIN ARC / IZU ARC / IZU-TOBU / IZU-TOBU / PACIFIC OCEAN	VOLCANIC ROCK	BASALT	3	Arc	WHOLE ROCK	0.97	5813.68		241	22	76	1.32	5.01	14.1	10.1	2.74	1.02	3.41	3.47	2.1	1.98	0.3	1.82	0.36
2014	[20107] ISHIZUKA O. (2014)	samp. R07	IZU-BONIN ARC / IZU ARC / IZU-TOBU / IZU-TOBU / PACIFIC OCEAN	VOLCANIC ROCK	BASALT	3	Arc	WHOLE ROCK	0.99	5933.55		262	21.5	79.6	1.33	4.96	14.1	10.1	2.78	1.04	3.1	3.44	2.11	1.89	0.3	1.86	0.34
2014	[20107] ISHIZUKA O. (2014)	samp. 1	IZU-BONIN ARC / IZU ARC / IZU-OSHIMA / OSHIMA / DREDGE 9 / PACIFIC OCEAN	VOLCANIC ROCK	BASALT	3	Arc	WHOLE ROCK	0.99	5933.55		477	21.3	40.6	0.44	2.19	6.47	5.45	1.86	0.69	2.49	3.15	2.02	1.97	0.31	1.1	0.21
2014	[20107] ISHIZUKA O. (2014)	samp. R02	IZU-BONIN ARC / IZU ARC / IZU-TOBU / IZU-TOBU / PACIFIC OCEAN	VOLCANIC ROCK	BASALT	3	Arc	WHOLE ROCK	1	5993.49		247	22.5	77.5	3.22	7.03	18.3	12.4	3.28	1.17	3.55	3.46	2.15	1.96	0.3	1.82	0.81
2014	[20107] ISHIZUKA O. (2014)	samp. 2	IZU-BONIN ARC / IZU ARC / IZU-OSHIMA / OSHIMA / DREDGE 9 / PACIFIC OCEAN	VOLCANIC ROCK	BASALT	3	Arc	WHOLE ROCK	1	5993.49		468	19.7	37.5	0.44	2.12	6.17	5.35	1.8	0.7	2.44	3.07	2.06	2.04	0.32	1.16	0.21
2014	[20107] ISHIZUKA O. (2014)	samp. 6	IZU-BONIN ARC / IZU ARC / IZU-OSHIMA / OSHIMA / DREDGE 9 / PACIFIC OCEAN	VOLCANIC ROCK	BASALT	3	Arc	WHOLE ROCK	1	5993.49		503	21.1	38.5	0.45	2.18	6.39	5.28	1.95	0.66	2.57	3.19	2.04	2.05	0.32	1.13	0.23
2014	[20107] ISHIZUKA O. (2014)	samp. R02	IZU-BONIN ARC / IZU ARC / IZU-OSHIMA / OSHIMA / PACIFIC OCEAN	VOLCANIC ROCK	BASALT	3	Arc	WHOLE ROCK	1.01	6053.42		500	20.2	40	0.55	2.33	6.89	5.46	1.76	0.68	2.41	3.03	1.87	1.87	0.29	1.1	0.21
2014	[20107] ISHIZUKA O. (2014)	samp. R07	IZU-BONIN ARC / IZU ARC / IZU-OSHIMA / OSHIMA / PACIFIC OCEAN	VOLCANIC ROCK	BASALT	3	Arc	WHOLE ROCK	1.01	6053.42		498	19	38.5	0.53	2.41	6.7	5.6	1.92	0.75	2.49	2.98	1.98	1.94	0.29	1.11	0.22
2014	[20107] ISHIZUKA O. (2014)	samp. R04	IZU-BONIN ARC / IZU ARC / IZU-TOBU / IZU-TOBU / PACIFIC OCEAN	VOLCANIC ROCK	BASALT	3	Arc	WHOLE ROCK	1.01	6053.42		232	22.7	81.5	3.32	7.11	18.7	12.6	3.4	1.2	3.63	3.55	2.16	1.98	0.31	1.86	0.83
2014	[20107] ISHIZUKA O. (2014)	samp. R01	IZU-BONIN ARC / IZU ARC / IZU-TOBU / IZU-TOBU / PACIFIC OCEAN	VOLCANIC ROCK	BASALT	3	Arc	WHOLE ROCK	1.01	6053.42		254	21.8	73.4	3.04	7.24	18.5	12.9	3.4	1.16	3.54	3.54	2.15	2.03	0.31	1.86	0.75
2014	[20107] ISHIZUKA O. (2014)	samp. R03	IZU-BONIN ARC / IZU ARC / IZU-OSHIMA / OSHIMA / PACIFIC OCEAN	VOLCANIC ROCK	BASALT	3	Arc	WHOLE ROCK	1.01	6053.42		480	20.1	38.8	0.56	2.41	6.9	5.68	2.01	0.78	2.47	3.17	2.08	2.04	0.32	1.19	0.23
2014	[20107] ISHIZUKA O. (2014)	samp. R08	IZU-BONIN ARC / IZU ARC / IZU-OSHIMA / OSHIMA / PACIFIC OCEAN	VOLCANIC ROCK	BASALT	3	Arc	WHOLE ROCK	1.02	6113.36		536	19.9	40.7	0.51	2.29	6.56	5.54	1.75	0.68	2.44	2.88	1.85	1.82	0.28	1.06	0.2
2014	[20107] ISHIZUKA O. (2014)	samp. R02	IZU-BONIN ARC / IZU ARC / IZU-OSHIMA / OSHIMA / PACIFIC OCEAN	VOLCANIC ROCK	BASALT	3	Arc	WHOLE ROCK	1.02	6113.36		478	19.7	40.1	0.49	2.32	6.76	5.52	1.83	0.71	2.35	2.89	1.9	1.84	0.3	1.1	0.2
2014	[20107] ISHIZUKA O. (2014)	samp. R09	IZU-BONIN ARC / IZU ARC / IZU-OSHIMA / OSHIMA / PACIFIC OCEAN	VOLCANIC ROCK	BASALT	3	Arc	WHOLE ROCK	1.02	6113.36		498	19.8	39.5	0.51	2.35	6.68	5.64	1.87	0.71	2.56	3	2.01	1.94	0.31	1.13	0.22
2014	[20107] ISHIZUKA O. (2014)	samp. R03	IZU-BONIN ARC / IZU ARC / IZU-OSHIMA / OSHIMA / PACIFIC OCEAN	VOLCANIC ROCK	BASALT	3	Arc	WHOLE ROCK	1.02	6113.36		495	20	39.7	0.55	2.38	6.84	5.77	1.85	0.76	2.55	2.94	1.94	1.94	0.3	1.13	0.22
2014	[20107] ISHIZUKA O. (2014)	samp. R05	IZU-BONIN ARC / IZU ARC / IZU-TOBU / IZU-TOBU / PACIFIC OCEAN	VOLCANIC ROCK	BASALT	3	Arc	WHOLE ROCK	1.02	6113.36		243	22.8	82.4	3.27	7.17	18.5	12.5	3.42	1.17	3.69	3.6	2.18	2.04	0.31	1.88	0.77
2014	[20107] ISHIZUKA O. (2014)	samp. 3	IZU-BONIN ARC / IZU ARC / IZU-OSHIMA / OSHIMA / DREDGE 9 / PACIFIC OCEAN	VOLCANIC ROCK	BASALT	3	Arc	WHOLE ROCK	1.02	6113.36		485	21.5	41	0.46	2.27	6.65	5.76	1.95	0.72	2.6	3.31	2.13	2.13	0.32	1.2	0.23
2014	[20107] ISHIZUKA O. (2014)	samp. R04	IZU-BONIN ARC / IZU ARC / IZU-OSHIMA / OSHIMA / PACIFIC OCEAN	VOLCANIC ROCK	BASALT	3	Arc	WHOLE ROCK	1.03	6173.29		522	20.5	40.2	0.52	2.35	6.93	5.7	1.77	0.69	2.42	2.97	1.95	1.87	0.29	1.06	0.22
2014	[20107] ISHIZUKA O. (2014)	samp. R10	IZU-BONIN ARC / IZU ARC / IZU-OSHIMA / OSHIMA / PACIFIC OCEAN	VOLCANIC ROCK	BASALT	3	Arc	WHOLE ROCK	1.03	6173.29		502	20	40	0.52	2.38	6.73	5.55	1.83	0.71	2.44	3.03	1.94	1.91	0.3	1.07	0.22
2014	[20107] ISHIZUKA O. (2014)	samp. R01	IZU-BONIN ARC / IZU ARC / IZU-OSHIMA / OSHIMA / PACIFIC OCEAN	VOLCANIC ROCK	BASALT	3	Arc	WHOLE ROCK	1.03	6173.29		488	19.8	40.9	0.48	2.37	6.97	5.66	1.91	0.72	2.57	2.99	1.96	1.93	0.31	1.12	0.21
2014	[20107] ISHIZUKA O. (2014)	samp. R10	IZU-BONIN ARC / IZU ARC / IZU-OSHIMA / OSHIMA / PACIFIC OCEAN	VOLCANIC ROCK	BASALT	3	Arc	WHOLE ROCK	1.03	6173.29		505	19.5	39.2	0.44	2.11	6.18	5.28	1.84	0.66	2.45	3.09	1.99	2	0.31	1.1	0.21
2014	[20107] ISHIZUKA O. (2014)	samp. R01	IZU-BONIN ARC / IZU ARC / IZU-OSHIMA / OSHIMA / PACIFIC OCEAN	VOLCANIC ROCK	BASALT	3	Arc	WHOLE ROCK	1.03	6173.29		494	20.2	39.8	0.58	2.47	7.04	5.89	2.07	0.78	2.72	3.18	2.08	2.02	0.32	1.19	0.26
2014	[20107] ISHIZUKA O. (2014)	samp. R09	IZU-BONIN ARC / IZU ARC / IZU-OSHIMA / OSHIMA / PACIFIC OCEAN	VOLCANIC ROCK	BASALT	3	Arc	WHOLE ROCK	1.03	6173.29		471	19.4	39.1	0.45	2.14	6.24	5.46	1.95	0.73	2.56	3.15	2.08	2.07	0.32	1.15	0.22
2014	[20107] ISHIZUKA O. (2014)	samp. R05	IZU-BONIN ARC / IZU ARC / IZU-OSHIMA / OSHIMA / PACIFIC OCEAN	VOLCANIC ROCK	BASALT	3	Arc	WHOLE ROCK	1.04	6233.23		520	20.3	40.4	0.56	2.44	6.9	5.81	1.89	0.75	2.51	3.12	2.05	2.02	0.32	1.13	0.22
2014	[20107] ISHIZUKA O. (2014)	samp. R11	IZU-BONIN ARC / IZU ARC / IZU-OSHIMA / OSHIMA / PACIFIC OCEAN	VOLCANIC ROCK	BASALT	3	Arc	WHOLE ROCK	1.04	6233.23		503	20.7	39.4	0.5	2.25	6.49	5.5	2.02	0.72	2.68	3.14	2.12	2.13	0.33	1.17	0.22
2014	[20107] ISHIZUKA O. (2014)	samp. R06	IZU-BONIN ARC / IZU ARC / IZU-OSHIMA / OSHIMA / PACIFIC OCEAN	VOLCANIC ROCK	BASALT	3	Arc	WHOLE ROCK	1.05	6293.16		523	21.2	41.6	0.49	2.44	7.03	5.59	1.79	0.69	2.46	2.98	1.95	1.86	0.29	1.12	0.22
2014	[20107] ISHIZUKA O. (2014)	samp. R04	IZU-BONIN ARC / IZU ARC / IZU-OSHIMA / OSHIMA / PACIFIC OCEAN	VOLCANIC ROCK	BASALT	3	Arc	WHOLE ROCK	1.05	6293.16		506	21	42.4	0.58	2.47	7.15	6.05	1.95	0.74	2.64	3.15	2.04	2.03	0.31	1.17	0.23
2014	[20107] ISHIZUKA O. (2014)	samp. R11	IZU-BONIN ARC / IZU ARC / IZU-OSHIMA / OSHIMA / PACIFIC OCEAN	VOLCANIC ROCK	BASALT	3	Arc	WHOLE ROCK	1.06	6353.1		515	19.8	42.2	0.51	2.37	7.09	5.68	1.95	0.73	2.58	3.1	1.98	1.96	0.32	1.16	0.21
2014	[20107] ISHIZUKA O. (2014)	samp. 4	IZU-BONIN ARC / IZU ARC / IZU-OSHIMA / OSHIMA / DREDGE 9 / PACIFIC OCEAN	VOLCANIC ROCK	BASALT	3	Arc	WHOLE ROCK	1.06	6353.1		565	22.5	42.1	0.52	2.29	6.68	5.65	2.09	0.7	2.85	3.44	2.25	2.2	0.36	1.23	0.26
2014	[20107] ISHIZUKA O. (2014)	samp. 2	IZU-BONIN ARC / IZU ARC / IZU-OSHIMA / OSHIMA / DREDGE 36 / PACIFIC OCEAN	VOLCANIC ROCK	BASALT	3	Arc	WHOLE ROCK	1.07	6413.03		542	21.3	44.1	0.6	2.6	7.36	5.94	1.9	0.72	2.45	3.11	2.05	1.97	0.31	1.15	0.28
2014	[20107] ISHIZUKA O. (2014)	samp. 1	IZU-BONIN ARC / IZU ARC / IZU-OSHIMA / OSHIMA / DREDGE 36 / PACIFIC OCEAN	VOLCANIC ROCK	BASALT	3	Arc	WHOLE ROCK	1.08	6472.97		567	21.4	43.2	0.58	2.51	7.14	5.74	1.93	0.68	2.53	3.08	2.04	2.02	0.31	1.13	0.23
2014	[20107] ISHIZUKA O. (2014)	samp. R09	IZU-BONIN ARC / IZU ARC / IZU-OSHIMA / OSHIMA / PACIFIC OCEAN	VOLCANIC ROCK	BASALT	3	Arc	WHOLE ROCK	1.08	6472.97		540	22.4	45	0.53	2.26	6.83	5.59	2.06	0.8	2.9	3.46	2.25	2.2	0.34	1.23	0.21
2014	[20107] ISHIZUKA O. (2014)	samp. 3	IZU-BONIN ARC / IZU ARC / IZU-OSHIMA / OSHIMA / DREDGE 36 / PACIFIC OCEAN	VOLCANIC ROCK	BASALT	3	Arc	WHOLE ROCK	1.09	6532.9		540	21.6	42.6	0.57	2.7	7.39	6.15	1.97	0.75	2.54	3.11	2.09	2.05	0.31	1.13	0.25
2014	[20107] ISHIZUKA O. (2014)	samp. R10	IZU-BONIN ARC / IZU ARC / IZU-OSHIMA / OSHIMA / PACIFIC OCEAN	VOLCANIC ROCK	BASALT	3	Arc	WHOLE ROCK	1.09	6532.9		518	21.4	43.1	0.45	2.32	6.81	5.79	1.94	0.76	2.59	3.27	2.14	2.1	0.34	1.22	0.19
2014	[20107] ISHIZUKA O. (2014)	samp. 2	IZU-BONIN ARC / IZU ARC / IZU-OSHIMA / OSHIMA / DREDGE 29 / PACIFIC OCEAN	VOLCANIC ROCK	BASALT	3	Arc	WHOLE ROCK	1.09	6532.9		545	22.5	41.4	0.48	2.31	6.74	5.76	1.89	0.7	2.6	3.36	2.17	2.12	0.33	1.16	0.22
2014	[20107] ISHIZUKA O. (2014)	samp. R16	IZU-BONIN ARC / IZU ARC / IZU-OSHIMA / OSHIMA / PACIFIC OCEAN	VOLCANIC ROCK	BASALT	3	Arc	WHOLE ROCK	1.09	6532.9		540	22	41.3	0.55	2.32	6.56	5.82	2.05	0.76	2.85	3.45	2.3	2.24	0.34	1.27	0.24
2014	[20107] ISHIZUKA O. (2014)	samp. 5	IZU-BONIN ARC / IZU ARC / IZU-OSHIMA / OSHIMA / DREDGE 22 / PACIFIC OCEAN	VOLCANIC ROCK	BASALT	3	Arc	WHOLE ROCK	1.1	6592.84		510	19.9	40.5	0.43	2.13	6.33	5.58	1.86	0.72	2.61	3.24	2.11	2.09	0.32	1.16	0.18
2014	[20107] ISHIZUKA O. (2014)	samp. 1	IZU-BONIN ARC / IZU ARC / IZU-OSHIMA / OSHIMA / DREDGE 29 / PACIFIC OCEAN	VOLCANIC ROCK	BASALT	3	Arc	WHOLE ROCK	1.1	6592.84		539	22.7	43.1	0.55	2.49	6.94	5.88	1.99	0.77	2.72	3.36	2.28	2.27	0.35	1.22	0.29
2014	[20107] ISHIZUKA O. (2014)	samp. 4	IZU-BONIN ARC / IZU ARC / IZU-OSHIMA / OSHIMA / DREDGE 22 / PACIFIC OCEAN	VOLCANIC ROCK	BASALT	3	Arc	WHOLE ROCK	1.11	6652.77		529	20.9	41.9	0.41	2.26	6.62	5.49	1.87	0.66	2.63	3.21	2.21	2.11	0.33	1.19	0.21
2014	[20107] ISHIZUKA O. (2014)	samp. R08	IZU-BONIN ARC / IZU ARC / IZU-OSHIMA / OSHIMA / PACIFIC OCEAN	VOLCANIC ROCK	BASALT	3	Arc	WHOLE ROCK	1.13	6772.64		554	22.4	41.8	0.46	2.14	6.54	5.79	1.99	0.81	2.87	3.58	2.36	2.37	0.35	1.32	0.22
2014	[20107] ISHIZUKA O. (2014)	samp. R14	IZU-BONIN ARC / IZU ARC / IZU-OSHIMA / OSHIMA / PACIFIC OCEAN	VOLCANIC ROCK	BASALT	3	Arc	WHOLE ROCK	1.14	6832.58		572	24.2	43.5	0.43	2.06	6.41	5.52	2	0.78	2.84	3.52	2.36	2.31	0.36	1.23	0.2
2014	[20107] ISHIZUKA O. (2014)	samp. R11	IZU-BONIN ARC / IZU ARC / IZU-OSHIMA / OSHIMA / PACIFIC OCEAN	VOLCANIC ROCK	BASALT	3	Arc	WHOLE ROCK	1.15	6892.51		585	24.1	43.9	0.45	2.13	6.69	5.68	2.04	0.77	2.83	3.61	2.32	2.33	0.36	1.26	0.23
2014	[20107] ISHIZUKA O. (2014)	samp. R17	IZU-BONIN ARC / IZU ARC / IZU-OSHIMA / OSHIMA / PACIFIC OCEAN	VOLCANIC ROCK	BASALT	3	Arc	WHOLE ROCK	1.15	6892.51		589	23.4	44.3	0.56	2.45	7.29	6.16	2.17	0.82	3.03	3.65	2.4	2.33	0.36	1.32	0.25
2014	[20107] ISHIZUKA O. (2014)	samp. R04	IZU-BONIN ARC / IZU ARC / IZU-OSHIMA / OSHIMA / PACIFIC OCEAN	VOLCANIC ROCK	BASALT	3	Arc	WHOLE ROCK	1.16	6952.45		576	23.5	43.7	0.45	2.19	6.61	6.06	2.09	0.8	2.8	3.64	2.4	2.33	0.36	1.24	0.22
2014	[20107] ISHIZUKA O. (2014)	samp. R07	IZU-BONIN ARC / IZU ARC / IZU-OSHIMA / OSHIMA / PACIFIC OCEAN	VOLCANIC ROCK	BASALT	3	Arc	WHOLE ROCK	1.16	6952.45		558	24	42.7	0.46	2.13	6.65	5.8	2.05	0.8	2.79	3.66	2.41	2.34	0.36	1.26	0.22
2014	[20107] ISHIZUKA O. (2014)	samp. R09	IZU-BONIN ARC / IZU ARC / IZU-OSHIMA / OSHIMA / PACIFIC OCEAN	VOLCANIC ROCK	BASALT	3	Arc	WHOLE ROCK	1.16	6952.45		567	24.3	45.3	0.44	2.31	6.55	5.88	2.13	0.81	2.94	3.69	2.49	2.36	0.38	1.31	0.22
2014	[20107] ISHIZUKA O. (2014)	samp. R06	IZU-BONIN ARC / IZU ARC / IZU-OSHIMA / OSHIMA / PACIFIC OCEAN	VOLCANIC ROCK	BASALT	3	Arc	WHOLE ROCK	1.16	6952.45		579	24.4	43.2	0.49	2.23	6.77	5.84	2.1	0.75	2.82	3.73	2.37	2.4	0.37	1.29	0.23
2014	[20107] ISHIZUKA O. (2014)	samp. R08	IZU-BONIN ARC / IZU ARC / IZU-OSHIMA / OSHIMA / PACIFIC OCEAN	VOLCANIC ROCK	BASALT	3	Arc	WHOLE ROCK	1.17	7012.38		595	25.2	45.9	0.55	2.28	6.93	6.29	2.17	0.78	2.94	3.78	2.52	2.41	0.36	1.3	0.3
2014	[20107] ISHIZUKA O. (2014)	samp. 3	IZU-BONIN ARC / IZU ARC / IZU-OSHIMA / OSHIMA / DREDGE 12 / PACIFIC OCEAN	VOLCANIC ROCK	BASALT	3	Arc	WHOLE ROCK	1.19	7132.25		614	24.8	45.7	0.4	2.27	6.84	6.03	2.25	0.81	3.09	3.82	2.51	2.47	0.38	1.33	0.22
2005	[8488] TAMURA Y.(2005) [GeoReM [1132] ]	samp. 3K-575R4	IZU-BONIN ARC / IZU ARC / SUMISUJIMA / PACIFIC OCEAN	VOLCANIC ROCK	BASALT	3	Arc	WHOLE ROCK	0.49	2936.81			12.1	20.6	0.4	0.785	2.53	2.85	1.13	0.482	1.77	2.26	1.5	1.46	0.22		0.06
2005	[8488] TAMURA Y.(2005) [GeoReM [1132] ]	samp. SI10	IZU-BONIN ARC / IZU ARC / SUMISUJIMA / PACIFIC OCEAN	VOLCANIC ROCK	BASALT	3	Arc	WHOLE ROCK	0.7	4195.44			14.6	29.6	0.6	1.57	4.51	4.52	1.61	0.658	2.32	2.85	1.91	1.85	0.286		0.179
2005	[8488] TAMURA Y.(2005) [GeoReM [1132] ]	samp. 3K-575R7	IZU-BONIN ARC / IZU ARC / SUMISUJIMA / PACIFIC OCEAN	VOLCANIC ROCK	BASALT	3	Arc	WHOLE ROCK	0.71	4255.38			16.8	34.8	0.7	1.75	5.05	5.01	1.79	0.695	2.58	3.09	2.05	1.98	0.302		0.189
2005	[8488] TAMURA Y.(2005) [GeoReM [1132] ]	samp. SI14	IZU-BONIN ARC / IZU ARC / SUMISUJIMA / PACIFIC OCEAN	VOLCANIC ROCK	BASALT	3	Arc	WHOLE ROCK	0.76	4555.05			16.4	33.6	0.5	1.67	4.88	4.87	1.75	0.685	2.54	3.04	2	1.91	0.293		0.181
2006	[9270] YOKOYAMA TETSUYA(2006) [GeoReM [2592] ]	samp. 1802	IZU-BONIN ARC / IZU ARC / MIYAKEJIMA/MIYAKE-ZIMA / MIYAKEJIMA/MIYAKE-ZIMA / PACIFIC OCEAN	VOLCANIC ROCK	BASALT	3	Arc	WHOLE ROCK	1.13	6772.64			26.8	50.1	0.406	2.8	8.27	7.92	2.68	0.999	3.41	4.33	2.62	2.73	0.4	1.51	0.259
2006	[9270] YOKOYAMA TETSUYA(2006) [GeoReM [2592] ]	samp. 1803	IZU-BONIN ARC / IZU ARC / MIYAKEJIMA/MIYAKE-ZIMA / MIYAKEJIMA/MIYAKE-ZIMA / PACIFIC OCEAN	VOLCANIC ROCK	BASALT	3	Arc	WHOLE ROCK	1.16	6952.45			28.1	50.5	0.412	2.85	8.42	8.07	2.71	1.02	3.45	4.36	2.69	2.83	0.41	1.63	0.26
2006	[9270] YOKOYAMA TETSUYA(2006) [GeoReM [2592] ]	samp. 1801	IZU-BONIN ARC / IZU ARC / MIYAKEJIMA/MIYAKE-ZIMA / MIYAKEJIMA/MIYAKE-ZIMA / PACIFIC OCEAN	VOLCANIC ROCK	BASALT	3	Arc	WHOLE ROCK	1.16	6952.45			28.3	51.7	0.435	2.94	8.49	8.25	2.73	1.02	3.61	4.56	2.67	2.92	0.42	1.6	0.262
1998	[2328] TAYLOR R. N. (1998)	samp. HJ01	IZU-BONIN ARC / IZU ARC / HACHIJOJIMA/HATIZYO-ZIMA / PACIFIC OCEAN	VOLCANIC ROCK	BASALT, THOLEIITIC	4	Arc	WHOLE ROCK	0.611	3662.02		310	12.1	14.3	0.14	0.64	2.24	2.63	1.08	0.475	1.55	2	1.33	1.33	0.21	0.5	0.037
1998	[2328] TAYLOR R. N. (1998)	samp. TRS13	IZU-BONIN ARC / IZU ARC / TORISHIMA/MITUGO-YAMA / TORISHIMA/MITUGO-YAMA / PACIFIC OCEAN	VOLCANIC ROCK	BASALT, THOLEIITIC	4	Arc	WHOLE ROCK	0.529	3170.56	40.4	329	10.3	14	0.15	0.55	2.02	2.312	0.97	0.436	1.45	1.87	1.22	1.25	0.2	0.56	0.045
1998	[2328] TAYLOR R. N. (1998)	samp. TR03D	IZU-BONIN ARC / IZU ARC / TORISHIMA/MITUGO-YAMA / TORISHIMA/MITUGO-YAMA / PACIFIC OCEAN	VOLCANIC ROCK	BASALT, THOLEIITIC	4	Arc	WHOLE ROCK	0.647	3877.79	38.1	354	13.1	17.1	0.18	0.78	2.61	2.882	1.14	0.481	1.66	2.15	1.41	1.4	0.22	0.63	0.064
1998	[2328] TAYLOR R. N. (1998)	samp. 781/4	IZU-BONIN ARC / IZU ARC / IZU-OSHIMA / OSHIMA / PACIFIC OCEAN	VOLCANIC ROCK	BASALT, THOLEIITIC	4	Arc	WHOLE ROCK	0.566	3392.31	40.8	364	11.3	17.8	0.19	0.75	2.57	2.58	1.03	0.438	1.48	1.8	1.2	1.21	0.18	0.58	0.099
1998	[2328] TAYLOR R. N. (1998)	samp. 781/5B	IZU-BONIN ARC / IZU ARC / IZU-OSHIMA / OSHIMA / PACIFIC OCEAN	VOLCANIC ROCK	BASALT, THOLEIITIC	4	Arc	WHOLE ROCK	0.61	3656.03	43.1	396	11.6	18	0.19	1.2	3.6	2.94	1.05	0.454	1.54	2	1.2	1.24	0.2	0.58	0.099
1998	[2328] TAYLOR R. N. (1998)	samp. TRS25	IZU-BONIN ARC / IZU ARC / TORISHIMA/MITUGO-YAMA / TORISHIMA/MITUGO-YAMA / PACIFIC OCEAN	VOLCANIC ROCK	BASALT, THOLEIITIC	4	Arc	WHOLE ROCK	0.666	3991.66	39.2	395	14.1	21.8	0.23	0.98	3.11	3.243	1.25	0.528	1.74	2.21	1.43	1.47	0.23	0.7	0.088
1998	[2328] TAYLOR R. N. (1998)	samp. AG63	IZU-BONIN ARC / IZU ARC / AOGASHIMA/AO-GA-SIMA / AOGASHIMA/AO-GA-SIMA / PACIFIC OCEAN	VOLCANIC ROCK	BASALT, THOLEIITIC	4	Arc	WHOLE ROCK	0.846	5070.49	35.3	409	16.3	28.7	0.35	1.32	4.38	4.39	1.64	0.698	2.33	2.89	1.9	1.94	0.32	1.04	0.094
1998	[2328] TAYLOR R. N. (1998)	samp. MY17	IZU-BONIN ARC / IZU ARC / MIYAKEJIMA/MIYAKE-ZIMA / MIYAKEJIMA/MIYAKE-ZIMA / PACIFIC OCEAN	VOLCANIC ROCK	BASALT, THOLEIITIC	4	Arc	WHOLE ROCK	1.029	6167.3	48.9	451	18.1	29.5	0.28	1.49	4.78	4.78	1.75	0.755	2.4	2.86	1.86	1.83	0.28	0.94	0.12
1998	[2328] TAYLOR R. N. (1998)	samp. HJ05	IZU-BONIN ARC / IZU ARC / HACHIJOJIMA/HATIZYO-ZIMA / PACIFIC OCEAN	VOLCANIC ROCK	BASALT, THOLEIITIC	4	Arc	WHOLE ROCK	1.06	6353.1	38.5	332	25.4	46.9	0.38	1.8	6.12	6.59	2.51	0.894	3.48	4.4	2.93	2.93	0.46	1.59	0.16
1998	[2328] TAYLOR R. N. (1998)	samp. HJ36	IZU-BONIN ARC / IZU ARC / HACHIJOJIMA/HATIZYO-ZIMA / PACIFIC OCEAN	VOLCANIC ROCK	BASALT, THOLEIITIC	4	Arc	WHOLE ROCK	1.42	8510.75	40.1	451	30.9	46.4	0.43	2.01	6.75	7.52	2.85	1.093	3.86	4.87	3.06	2.92	0.46	1.41	0.147
1998	[2328] TAYLOR R. N. (1998)	samp. HJ17	IZU-BONIN ARC / IZU ARC / HACHIJOJIMA/HATIZYO-ZIMA / PACIFIC OCEAN	VOLCANIC ROCK	BASALT, THOLEIITIC	4	Arc	WHOLE ROCK	1.443	8648.6	39.1	403	32.2	61.8	0.53	2.58	8.55	8.99	3.29	1.175	4.32	5.32	3.35	3.18	0.5	1.72	0.212
1998	[2328] TAYLOR R. N. (1998)	samp. HJ12	IZU-BONIN ARC / IZU ARC / HACHIJOJIMA/HATIZYO-ZIMA / PACIFIC OCEAN	VOLCANIC ROCK	BASALT, THOLEIITIC	4	Arc	WHOLE ROCK	0.792	4746.84	40.6	330	29.3	63.8	0.52	2.4	7.88	7.89	2.85	0.887	3.85	4.81	3.18	3.2	0.49	1.95	0.251
1998	[2328] TAYLOR R. N. (1998)	samp. HJ47	IZU-BONIN ARC / IZU ARC / HACHIJOJIMA/HATIZYO-ZIMA / PACIFIC OCEAN	VOLCANIC ROCK	BASALT, THOLEIITIC	4	Arc	WHOLE ROCK	0.442	2649.12	36.6	377	33.9	67.6	0.56	2.63	8.86	9.43	3.49	1.191	4.68	5.77	3.65	3.61	0.56	2.11	0.214
1998	[2328] TAYLOR R. N. (1998)	samp. HJ28	IZU-BONIN ARC / IZU ARC / HACHIJOJIMA/HATIZYO-ZIMA / PACIFIC OCEAN	VOLCANIC ROCK	BASALT, THOLEIITIC	4	Arc	WHOLE ROCK	1.76	10548.5	40	292	42.2	93.9	0.72	3.74	12.28	13.01	4.76	1.61	6.33	7.92	5.09	5.13	0.78	2.76	0.295
2003	[6564] YOKOYAMA TETSUYA(2003) [GeoReM [510] ]	samp. 3015	IZU-BONIN ARC / IZU ARC / MIYAKEJIMA/MIYAKE-ZIMA / MIYAKEJIMA/MIYAKE-ZIMA / PACIFIC OCEAN	VOLCANIC ROCK	BASALT, THOLEIITIC	4	Arc	WHOLE ROCK	0.75	4495.12			15.1	26.7	0.21	1.58	4.7	4.41	1.41	0.64	2	2.56	1.51	1.66	0.24	0.85	0.135
2003	[6564] YOKOYAMA TETSUYA(2003) [GeoReM [510] ]	samp. 3012	IZU-BONIN ARC / IZU ARC / MIYAKEJIMA/MIYAKE-ZIMA / MIYAKEJIMA/MIYAKE-ZIMA / PACIFIC OCEAN	VOLCANIC ROCK	BASALT, THOLEIITIC	4	Arc	WHOLE ROCK	0.75	4495.12			16.9	26.5	0.23	1.64	4.8	4.61	1.6	0.66	2.04	2.7	1.6	1.72	0.25	0.86	0.134
2003	[6564] YOKOYAMA TETSUYA(2003) [GeoReM [510] ]	samp. 3014	IZU-BONIN ARC / IZU ARC / MIYAKEJIMA/MIYAKE-ZIMA / MIYAKEJIMA/MIYAKE-ZIMA / PACIFIC OCEAN	VOLCANIC ROCK	BASALT, THOLEIITIC	4	Arc	WHOLE ROCK	0.76	4555.05			16.4	27.5	0.22	1.72	5	4.62	1.5	0.71	2.08	2.67	1.58	1.71	0.25	0.89	0.139
2003	[6564] YOKOYAMA TETSUYA(2003) [GeoReM [510] ]	samp. 3009	IZU-BONIN ARC / IZU ARC / MIYAKEJIMA/MIYAKE-ZIMA / MIYAKEJIMA/MIYAKE-ZIMA / PACIFIC OCEAN	VOLCANIC ROCK	BASALT, THOLEIITIC	4	Arc	WHOLE ROCK	0.76	4555.05			17.8	26.3	0.22	1.86	4.8	4.89	1.64	0.7	2.09	2.84	1.76	1.88	0.27	0.86	0.136
2003	[6564] YOKOYAMA TETSUYA(2003) [GeoReM [510] ]	samp. 3010	IZU-BONIN ARC / IZU ARC / MIYAKEJIMA/MIYAKE-ZIMA / MIYAKEJIMA/MIYAKE-ZIMA / PACIFIC OCEAN	VOLCANIC ROCK	BASALT, THOLEIITIC	4	Arc	WHOLE ROCK	0.78	4674.92			18.1	26.7	0.21	1.87	5	4.87	1.8	0.72	2.26	2.72	1.69	1.84	0.27	0.91	0.14
2003	[6564] YOKOYAMA TETSUYA(2003) [GeoReM [510] ]	samp. 3013	IZU-BONIN ARC / IZU ARC / MIYAKEJIMA/MIYAKE-ZIMA / MIYAKEJIMA/MIYAKE-ZIMA / PACIFIC OCEAN	VOLCANIC ROCK	BASALT, THOLEIITIC	4	Arc	WHOLE ROCK	0.79	4734.86			17.7	28.6	0.24	1.78	5.1	4.99	1.64	0.7	2.12	2.75	1.7	1.82	0.28	0.92	0.144
2003	[6564] YOKOYAMA TETSUYA(2003) [GeoReM [510] ]	samp. 3002	IZU-BONIN ARC / IZU ARC / MIYAKEJIMA/MIYAKE-ZIMA / MIYAKEJIMA/MIYAKE-ZIMA / PACIFIC OCEAN	VOLCANIC ROCK	BASALT, THOLEIITIC	4	Arc	WHOLE ROCK	0.82	4914.66			16	24.1	0.19	1.41	4.4	4.21	1.66	0.68	2.13	2.61	1.58	1.68	0.27	0.81	0.112
2003	[6564] YOKOYAMA TETSUYA(2003) [GeoReM [510] ]	samp. 3003	IZU-BONIN ARC / IZU ARC / MIYAKEJIMA/MIYAKE-ZIMA / MIYAKEJIMA/MIYAKE-ZIMA / PACIFIC OCEAN	VOLCANIC ROCK	BASALT, THOLEIITIC	4	Arc	WHOLE ROCK	0.83	4974.6			17.5	24.7	0.19	1.39	4.3	4.17	1.52	0.66	2.13	2.74	1.6	1.75	0.26	0.82	0.113
2003	[6564] YOKOYAMA TETSUYA(2003) [GeoReM [510] ]	samp. 0316	IZU-BONIN ARC / IZU ARC / MIYAKEJIMA/MIYAKE-ZIMA / MIYAKEJIMA/MIYAKE-ZIMA / PACIFIC OCEAN	VOLCANIC ROCK	BASALT, THOLEIITIC	4	Arc	WHOLE ROCK	0.83	4974.6			16.5	23.6	0.17	1.43	4.2	4.25	1.56	0.65	2	2.62	1.57	1.75	0.25	0.74	0.099
2003	[6564] YOKOYAMA TETSUYA(2003) [GeoReM [510] ]	samp. 2906	IZU-BONIN ARC / IZU ARC / MIYAKEJIMA/MIYAKE-ZIMA / MIYAKEJIMA/MIYAKE-ZIMA / PACIFIC OCEAN	VOLCANIC ROCK	BASALT, THOLEIITIC	4	Arc	WHOLE ROCK	0.83	4974.6			16	24.5	0.19	1.47	4.2	4.36	1.54	0.65	2.07	2.6	1.58	1.82	0.25	0.75	0.111
2003	[6564] YOKOYAMA TETSUYA(2003) [GeoReM [510] ]	samp. 3001	IZU-BONIN ARC / IZU ARC / MIYAKEJIMA/MIYAKE-ZIMA / MIYAKEJIMA/MIYAKE-ZIMA / PACIFIC OCEAN	VOLCANIC ROCK	BASALT, THOLEIITIC	4	Arc	WHOLE ROCK	0.84	5034.53			19.7	25	0.2	1.53	4.5	4.56	1.6	0.73	2.34	2.85	1.76	1.82	0.28	0.84	0.115
2003	[6564] YOKOYAMA TETSUYA(2003) [GeoReM [510] ]	samp. 3004	IZU-BONIN ARC / IZU ARC / MIYAKEJIMA/MIYAKE-ZIMA / MIYAKEJIMA/MIYAKE-ZIMA / PACIFIC OCEAN	VOLCANIC ROCK	BASALT, THOLEIITIC	4	Arc	WHOLE ROCK	0.84	5034.53			19.3	25.4	0.19	1.62	4.6	4.91	1.68	0.75	2.29	2.88	1.78	1.94	0.29	0.84	0.118
2003	[6564] YOKOYAMA TETSUYA(2003) [GeoReM [510] ]	samp. 3008	IZU-BONIN ARC / IZU ARC / MIYAKEJIMA/MIYAKE-ZIMA / MIYAKEJIMA/MIYAKE-ZIMA / PACIFIC OCEAN	VOLCANIC ROCK	BASALT, THOLEIITIC	4	Arc	WHOLE ROCK	0.85	5094.47			16.7	27.6	0.23	1.31	4.6	4.25	1.51	0.76	2.06	2.79	1.74	1.89	0.28	0.91	0.13
2003	[6564] YOKOYAMA TETSUYA(2003) [GeoReM [510] ]	samp. 3006	IZU-BONIN ARC / IZU ARC / MIYAKEJIMA/MIYAKE-ZIMA / MIYAKEJIMA/MIYAKE-ZIMA / PACIFIC OCEAN	VOLCANIC ROCK	BASALT, THOLEIITIC	4	Arc	WHOLE ROCK	0.93	5573.94			19.4	27.3	0.21	1.66	4.7	4.68	1.6	0.73	2.29	2.89	1.74	1.95	0.27	0.89	0.115
2003	[6564] YOKOYAMA TETSUYA(2003) [GeoReM [510] ]	samp. 2905	IZU-BONIN ARC / IZU ARC / MIYAKEJIMA/MIYAKE-ZIMA / MIYAKEJIMA/MIYAKE-ZIMA / PACIFIC OCEAN	VOLCANIC ROCK	BASALT, THOLEIITIC	4	Arc	WHOLE ROCK	0.94	5633.88			18	27.4	0.21	1.52	4.7	4.71	1.67	0.71	2.25	2.84	1.75	1.88	0.28	0.88	0.116
2003	[6564] YOKOYAMA TETSUYA(2003) [GeoReM [510] ]	samp. 3016	IZU-BONIN ARC / IZU ARC / MIYAKEJIMA/MIYAKE-ZIMA / MIYAKEJIMA/MIYAKE-ZIMA / PACIFIC OCEAN	VOLCANIC ROCK	BASALT, THOLEIITIC	4	Arc	WHOLE ROCK	0.94	5633.88			18.9	27	0.21	1.59	4.7	4.9	1.64	0.76	2.23	3.01	1.76	1.92	0.28	0.91	0.117
2003	[6564] YOKOYAMA TETSUYA(2003) [GeoReM [510] ]	samp. 3005	IZU-BONIN ARC / IZU ARC / MIYAKEJIMA/MIYAKE-ZIMA / MIYAKEJIMA/MIYAKE-ZIMA / PACIFIC OCEAN	VOLCANIC ROCK	BASALT, THOLEIITIC	4	Arc	WHOLE ROCK	0.94	5633.88			18.8	27	0.21	1.58	4.6	4.7	1.71	0.72	2.33	2.98	1.77	1.93	0.28	0.88	0.115
2003	[6564] YOKOYAMA TETSUYA(2003) [GeoReM [510] ]	samp. 3007	IZU-BONIN ARC / IZU ARC / MIYAKEJIMA/MIYAKE-ZIMA / MIYAKEJIMA/MIYAKE-ZIMA / PACIFIC OCEAN	VOLCANIC ROCK	BASALT, THOLEIITIC	4	Arc	WHOLE ROCK	0.94	5633.88			17.6	26.9	0.22	1.57	4.7	4.89	1.84	0.72	2.3	2.8	1.73	1.94	0.27	0.88	0.118
2003	[6564] YOKOYAMA TETSUYA(2003) [GeoReM [510] ]	samp. 2712	IZU-BONIN ARC / IZU ARC / MIYAKEJIMA/MIYAKE-ZIMA / MIYAKEJIMA/MIYAKE-ZIMA / PACIFIC OCEAN	VOLCANIC ROCK	BASALT, THOLEIITIC	4	Arc	WHOLE ROCK	0.94	5633.88			20.8	33	0.25	1.83	5.3	5.35	1.88	0.78	2.53	3.18	1.95	2.06	0.31	1.07	0.13
2003	[6564] YOKOYAMA TETSUYA(2003) [GeoReM [510] ]	samp. 0242	IZU-BONIN ARC / IZU ARC / MIYAKEJIMA/MIYAKE-ZIMA / MIYAKEJIMA/MIYAKE-ZIMA / PACIFIC OCEAN	VOLCANIC ROCK	BASALT, THOLEIITIC	4	Arc	WHOLE ROCK	0.97	5813.68			21.2	33.3	0.29	2	5.8	5.77	1.99	0.83	2.48	3.16	1.94	2.08	0.3	1.06	0.168
2003	[6564] YOKOYAMA TETSUYA(2003) [GeoReM [510] ]	samp. 2711	IZU-BONIN ARC / IZU ARC / MIYAKEJIMA/MIYAKE-ZIMA / MIYAKEJIMA/MIYAKE-ZIMA / PACIFIC OCEAN	VOLCANIC ROCK	BASALT, THOLEIITIC	4	Arc	WHOLE ROCK	0.98	5873.62			19.5	29	0.22	1.55	4.7	4.91	1.74	0.79	2.34	3.1	1.88	1.97	0.3	0.91	0.098
2003	[6564] YOKOYAMA TETSUYA(2003) [GeoReM [510] ]	samp. 0314	IZU-BONIN ARC / IZU ARC / MIYAKEJIMA/MIYAKE-ZIMA / MIYAKEJIMA/MIYAKE-ZIMA / PACIFIC OCEAN	VOLCANIC ROCK	BASALT, THOLEIITIC	4	Arc	WHOLE ROCK	0.99	5933.55			21.5	28.7	0.24	1.69	5.2	5.01	1.83	0.83	2.49	3.15	1.97	2.05	0.32	0.91	0.124
2003	[6564] YOKOYAMA TETSUYA(2003) [GeoReM [510] ]	samp. 2713	IZU-BONIN ARC / IZU ARC / MIYAKEJIMA/MIYAKE-ZIMA / MIYAKEJIMA/MIYAKE-ZIMA / PACIFIC OCEAN	VOLCANIC ROCK	BASALT, THOLEIITIC	4	Arc	WHOLE ROCK	1.04	6233.23			22.5	30.3	0.25	1.8	5.5	5.51	1.94	0.83	2.69	3.52	1.98	2.29	0.33	1	0.122
2003	[6564] YOKOYAMA TETSUYA(2003) [GeoReM [510] ]	samp. 3018	IZU-BONIN ARC / IZU ARC / MIYAKEJIMA/MIYAKE-ZIMA / MIYAKEJIMA/MIYAKE-ZIMA / PACIFIC OCEAN	VOLCANIC ROCK	BASALT, THOLEIITIC	4	Arc	WHOLE ROCK	1.05	6293.16			20.1	30.7	0.23	1.62	5	5.16	1.84	0.76	2.59	3.22	1.92	2.14	0.31	1.02	0.121
2003	[6564] YOKOYAMA TETSUYA(2003) [GeoReM [510] ]	samp. 2812	IZU-BONIN ARC / IZU ARC / MIYAKEJIMA/MIYAKE-ZIMA / MIYAKEJIMA/MIYAKE-ZIMA / PACIFIC OCEAN	VOLCANIC ROCK	BASALT, THOLEIITIC	4	Arc	WHOLE ROCK	1.11	6652.77			20.4	32	0.23	1.75	5.1	5.64	1.93	0.85	2.74	3.41	2.04	2.28	0.34	1	0.126
2003	[6564] YOKOYAMA TETSUYA(2003) [GeoReM [510] ]	samp. 2806	IZU-BONIN ARC / IZU ARC / MIYAKEJIMA/MIYAKE-ZIMA / MIYAKEJIMA/MIYAKE-ZIMA / PACIFIC OCEAN	VOLCANIC ROCK	BASALT, THOLEIITIC	4	Arc	WHOLE ROCK	1.12	6712.71			22.1	33.2	0.24	1.65	5.3	5.43	2.02	0.82	2.68	3.36	2.14	2.19	0.33	1.03	0.128
2003	[6564] YOKOYAMA TETSUYA(2003) [GeoReM [510] ]	samp. 2814	IZU-BONIN ARC / IZU ARC / MIYAKEJIMA/MIYAKE-ZIMA / MIYAKEJIMA/MIYAKE-ZIMA / PACIFIC OCEAN	VOLCANIC ROCK	BASALT, THOLEIITIC	4	Arc	WHOLE ROCK	1.16	6952.45			24	47.8	0.43	2.32	7.2	6.89	2.22	0.86	3.25	3.83	2.32	2.48	0.37	1.53	0.249
2003	[6564] YOKOYAMA TETSUYA(2003) [GeoReM [510] ]	samp. 2817	IZU-BONIN ARC / IZU ARC / MIYAKEJIMA/MIYAKE-ZIMA / MIYAKEJIMA/MIYAKE-ZIMA / PACIFIC OCEAN	VOLCANIC ROCK	BASALT, THOLEIITIC	4	Arc	WHOLE ROCK	1.17	7012.38			29	53	0.45	2.9	8.4	8.01	2.75	1.03	3.71	4.61	2.73	2.95	0.43	1.64	0.272
2003	[6564] YOKOYAMA TETSUYA(2003) [GeoReM [510] ]	samp. 2816	IZU-BONIN ARC / IZU ARC / MIYAKEJIMA/MIYAKE-ZIMA / MIYAKEJIMA/MIYAKE-ZIMA / PACIFIC OCEAN	VOLCANIC ROCK	BASALT, THOLEIITIC	4	Arc	WHOLE ROCK	1.18	7072.32			30.9	52.9	0.44	3.09	9.4	9.04	2.99	1.09	3.84	5.09	2.93	3.12	0.48	1.65	0.262
2003	[6564] YOKOYAMA TETSUYA(2003) [GeoReM [510] ]	samp. 2710	IZU-BONIN ARC / IZU ARC / MIYAKEJIMA/MIYAKE-ZIMA / MIYAKEJIMA/MIYAKE-ZIMA / PACIFIC OCEAN	VOLCANIC ROCK	BASALT, THOLEIITIC	4	Arc	WHOLE ROCK	1.21	7252.12			30.5	50.2	0.42	2.98	8.4	8.22	2.82	1.09	3.66	4.67	2.74	2.98	0.43	1.53	0.259
2003	[6564] YOKOYAMA TETSUYA(2003) [GeoReM [510] ]	samp. 0115	IZU-BONIN ARC / IZU ARC / MIYAKEJIMA/MIYAKE-ZIMA / MIYAKEJIMA/MIYAKE-ZIMA / PACIFIC OCEAN	VOLCANIC ROCK	BASALT, THOLEIITIC	4	Arc	WHOLE ROCK	1.26	7551.8			29.6	51.3	0.44	2.92	8.7	8.34	2.78	1.07	3.59	4.5	2.73	2.98	0.42	1.61	0.273
2003	[6564] YOKOYAMA TETSUYA(2003) [GeoReM [510] ]	samp. 2903	IZU-BONIN ARC / IZU ARC / MIYAKEJIMA/MIYAKE-ZIMA / MIYAKEJIMA/MIYAKE-ZIMA / PACIFIC OCEAN	VOLCANIC ROCK	BASALT, THOLEIITIC	4	Arc	WHOLE ROCK	1.31	7851.47			31.7	56.4	0.46	3.3	9.6	9.18	3.06	1.14	4.06	5.01	3.1	3.26	0.47	1.78	0.28
2003	[6564] YOKOYAMA TETSUYA(2003) [GeoReM [510] ]	samp. 2820	IZU-BONIN ARC / IZU ARC / MIYAKEJIMA/MIYAKE-ZIMA / MIYAKEJIMA/MIYAKE-ZIMA / PACIFIC OCEAN	VOLCANIC ROCK	BASALT, THOLEIITIC	4	Arc	WHOLE ROCK	1.32	7911.41			26.7	54.3	0.45	2.61	7.6	7.57	2.61	0.95	3.44	4.21	2.6	2.74	0.39	1.73	0.268
2003	[6564] YOKOYAMA TETSUYA(2003) [GeoReM [510] ]	samp. 2901	IZU-BONIN ARC / IZU ARC / MIYAKEJIMA/MIYAKE-ZIMA / MIYAKEJIMA/MIYAKE-ZIMA / PACIFIC OCEAN	VOLCANIC ROCK	BASALT, THOLEIITIC	4	Arc	WHOLE ROCK	1.35	8091.21			33	57.9	0.44	3.23	9.6	9.13	3.03	1.12	4.12	5.2	3.13	3.33	0.48	1.78	0.278
2008	[12151] ISHIZUKA O. (2008)	samp. KR04-01 D18-3	IZU-BONIN ARC / IZU ARC / HACHIJOJIMA/HATIZYO-ZIMA / PACIFIC OCEAN	VOLCANIC ROCK	THOLEIITE	5	Arc	WHOLE ROCK					18.9	23.6	0.23	0.92	3.15	3.66	1.62	0.71	2.38	3.01	1.93	1.96	0.3	0.72	0.057
2008	[12151] ISHIZUKA O. (2008)	samp. 03102814A	IZU-BONIN ARC / IZU ARC / HACHIJOJIMA/HATIZYO-ZIMA / HACHIJOJIMA NISHIYAMA/HATIZYO-ZIMA NISI-YAMA / PACIFIC OCEAN	VOLCANIC ROCK	THOLEIITE	5	Arc	WHOLE ROCK	0.71	4255.38			34.5	60.8	0.57	2.62	8.52	8.28	3.13	1.18	4.27	5.29	3.5	3.24	0.51	2.23	0.18
2008	[12151] ISHIZUKA O. (2008)	samp. KR04-01 D19-101	IZU-BONIN ARC / IZU ARC / HACHIJOJIMA/HATIZYO-ZIMA / PACIFIC OCEAN	VOLCANIC ROCK	THOLEIITE	5	Arc	WHOLE ROCK	0.83	4974.6			13.2	15.6	0.19	0.65	2.12	2.41	1.11	0.5	1.72	2.05	1.31	1.29	0.2	0.51	0.048
2008	[12151] ISHIZUKA O. (2008)	samp. KR04-01 D19-102	IZU-BONIN ARC / IZU ARC / HACHIJOJIMA/HATIZYO-ZIMA / PACIFIC OCEAN	VOLCANIC ROCK	THOLEIITE	5	Arc	WHOLE ROCK	0.83	4974.6			12.8	15.5	0.19	0.63	2.15	2.38	1.13	0.5	1.62	2.01	1.38	1.3	0.2	0.5	0.048
2008	[12151] ISHIZUKA O. (2008)	samp. KR04-01 D19-108	IZU-BONIN ARC / IZU ARC / HACHIJOJIMA/HATIZYO-ZIMA / PACIFIC OCEAN	VOLCANIC ROCK	THOLEIITE	5	Arc	WHOLE ROCK	0.84	5034.53			12.4	15.2	0.17	0.66	2.2	2.36	1.06	0.52	1.65	1.98	1.33	1.27	0.2	0.45	0.05
2008	[12151] ISHIZUKA O. (2008)	samp. KT03-8 D12-101	IZU-BONIN ARC / IZU ARC / HACHIJOJIMA/HATIZYO-ZIMA / PACIFIC OCEAN	VOLCANIC ROCK	THOLEIITE	5	Arc	WHOLE ROCK	0.95	5693.81			15	19.7	0.2	0.81	2.82	3.06	1.31	0.61	1.83	2.33	1.52	1.53	0.23	0.62	0.055
2008	[12151] ISHIZUKA O. (2008)	samp. KT03-8 D12-112	IZU-BONIN ARC / IZU ARC / HACHIJOJIMA/HATIZYO-ZIMA / PACIFIC OCEAN	VOLCANIC ROCK	THOLEIITE	5	Arc	WHOLE ROCK	0.96	5753.75			16.3	21.8	0.23	0.89	3.01	3.18	1.34	0.62	2.02	2.57	1.6	1.69	0.25	0.64	0.062
2008	[12151] ISHIZUKA O. (2008)	samp. KT03-8 D12-106	IZU-BONIN ARC / IZU ARC / HACHIJOJIMA/HATIZYO-ZIMA / PACIFIC OCEAN	VOLCANIC ROCK	THOLEIITE	5	Arc	WHOLE ROCK	0.97	5813.68			17.1	23	0.23	0.89	3.04	3.23	1.39	0.65	1.98	2.6	1.68	1.67	0.27	0.64	0.061
2008	[12151] ISHIZUKA O. (2008)	samp. KT03-8 D34-8	IZU-BONIN ARC / IZU ARC / HACHIJOJIMA/HATIZYO-ZIMA / PACIFIC OCEAN	VOLCANIC ROCK	THOLEIITE	5	Arc	WHOLE ROCK	0.97	5813.68			17.8	21	0.21	0.85	2.79	3.2	1.43	0.67	2.13	2.66	1.68	1.74	0.27	0.73	0.06
2008	[12151] ISHIZUKA O. (2008)	samp. KT03-8 D12-102	IZU-BONIN ARC / IZU ARC / HACHIJOJIMA/HATIZYO-ZIMA / PACIFIC OCEAN	VOLCANIC ROCK	THOLEIITE	5	Arc	WHOLE ROCK	0.98	5873.62			14.8	19.5	0.16	0.82	2.97	3.21	1.34	0.58	1.96	2.42	1.64	1.58	0.26	0.67	0.053
2008	[12151] ISHIZUKA O. (2008)	samp. KT03-8 D12-204	IZU-BONIN ARC / IZU ARC / HACHIJOJIMA/HATIZYO-ZIMA / PACIFIC OCEAN	VOLCANIC ROCK	THOLEIITE	5	Arc	WHOLE ROCK	0.98	5873.62			16.7	21	0.18	0.9	3.15	3.38	1.44	0.61	1.98	2.45	1.74	1.68	0.26	0.68	0.058
2008	[12151] ISHIZUKA O. (2008)	samp. KT03-8 D34-5	IZU-BONIN ARC / IZU ARC / HACHIJOJIMA/HATIZYO-ZIMA / PACIFIC OCEAN	VOLCANIC ROCK	THOLEIITE	5	Arc	WHOLE ROCK	0.99	5933.55			17.5	20.4	0.19	0.83	2.9	3.25	1.46	0.65	2.14	2.64	1.79	1.69	0.26	0.67	0.06
2008	[12151] ISHIZUKA O. (2008)	samp. KR0401 D22-104	IZU-BONIN ARC / IZU ARC / HACHIJOJIMA/HATIZYO-ZIMA / PACIFIC OCEAN	VOLCANIC ROCK	THOLEIITE	5	Arc	WHOLE ROCK	0.99	5933.55			16.9	21.3	0.2	0.87	2.96	3.32	1.42	0.63	2.14	2.71	1.8	1.8	0.26	0.64	0.052
2008	[12151] ISHIZUKA O. (2008)	samp. DIVE308 3-3	IZU-BONIN ARC / IZU ARC / HACHIJOJIMA/HATIZYO-ZIMA / PACIFIC OCEAN	VOLCANIC ROCK	THOLEIITE	5	Arc	WHOLE ROCK	0.99	5933.55			19.1	24.6	0.25	0.87	2.99	3.51	1.48	0.66	2.16	2.95	1.97	1.91	0.29	0.71	0.061
2008	[12151] ISHIZUKA O. (2008)	samp. KR04-01 D18-24	IZU-BONIN ARC / IZU ARC / HACHIJOJIMA/HATIZYO-ZIMA / PACIFIC OCEAN	VOLCANIC ROCK	THOLEIITE	5	Arc	WHOLE ROCK	1	5993.49			16.8	22.1	0.22	0.85	2.99	3.1	1.32	0.66	2.03	2.37	1.61	1.68	0.25	0.66	0.056
2008	[12151] ISHIZUKA O. (2008)	samp. KT03-8 D34-6	IZU-BONIN ARC / IZU ARC / HACHIJOJIMA/HATIZYO-ZIMA / PACIFIC OCEAN	VOLCANIC ROCK	THOLEIITE	5	Arc	WHOLE ROCK	1	5993.49			16.9	18.5	0.17	0.83	2.72	3.26	1.34	0.62	2.01	2.54	1.7	1.72	0.27	0.64	0.051
2008	[12151] ISHIZUKA O. (2008)	samp. KR04-01 D18-14	IZU-BONIN ARC / IZU ARC / HACHIJOJIMA/HATIZYO-ZIMA / PACIFIC OCEAN	VOLCANIC ROCK	THOLEIITE	5	Arc	WHOLE ROCK	1	5993.49			18.4	22.6	0.22	0.92	3.02	3.51	1.5	0.75	2.35	2.98	1.91	1.79	0.29	0.66	0.059
2008	[12151] ISHIZUKA O. (2008)	samp. KR04-01 D18-1	IZU-BONIN ARC / IZU ARC / HACHIJOJIMA/HATIZYO-ZIMA / PACIFIC OCEAN	VOLCANIC ROCK	THOLEIITE	5	Arc	WHOLE ROCK	1	5993.49			19.1	23.7	0.24	0.92	3.17	3.56	1.6	0.7	2.5	2.89	2.02	1.91	0.28	0.74	0.052
2008	[12151] ISHIZUKA O. (2008)	samp. DIVE308 5-2	IZU-BONIN ARC / IZU ARC / HACHIJOJIMA/HATIZYO-ZIMA / PACIFIC OCEAN	VOLCANIC ROCK	THOLEIITE	5	Arc	WHOLE ROCK	1.01	6053.42			18.8	22.9	0.25	0.86	2.94	3.35	1.45	0.67	1.99	2.7	1.77	1.64	0.25	0.6	0.051
2008	[12151] ISHIZUKA O. (2008)	samp. KR0401 D22-101	IZU-BONIN ARC / IZU ARC / HACHIJOJIMA/HATIZYO-ZIMA / PACIFIC OCEAN	VOLCANIC ROCK	THOLEIITE	5	Arc	WHOLE ROCK	1.01	6053.42			17.4	21.5	0.22	0.85	2.92	3.34	1.47	0.66	2.3	2.79	1.81	1.79	0.27	0.66	0.06
2008	[12151] ISHIZUKA O. (2008)	samp. KR04-01 D18-8	IZU-BONIN ARC / IZU ARC / HACHIJOJIMA/HATIZYO-ZIMA / PACIFIC OCEAN	VOLCANIC ROCK	THOLEIITE	5	Arc	WHOLE ROCK	1.01	6053.42			18.8	22.7	0.24	0.91	3.04	3.67	1.58	0.73	2.28	2.89	1.88	1.86	0.28	0.73	0.062
2008	[12151] ISHIZUKA O. (2008)	samp. DIVE308 3-1	IZU-BONIN ARC / IZU ARC / HACHIJOJIMA/HATIZYO-ZIMA / PACIFIC OCEAN	VOLCANIC ROCK	THOLEIITE	5	Arc	WHOLE ROCK	1.01	6053.42			19.7	23.1	0.28	0.93	3.26	3.63	1.54	0.7	2.24	2.95	1.98	1.89	0.29	0.7	0.055
2008	[12151] ISHIZUKA O. (2008)	samp. KT03-8 D34-4	IZU-BONIN ARC / IZU ARC / HACHIJOJIMA/HATIZYO-ZIMA / PACIFIC OCEAN	VOLCANIC ROCK	THOLEIITE	5	Arc	WHOLE ROCK	1.02	6113.36			17.2	18.5	0.19	0.82	2.78	3.38	1.41	0.62	2.25	2.57	1.72	1.69	0.28	0.66	0.056
2008	[12151] ISHIZUKA O. (2008)	samp. DIVE308 5-1	IZU-BONIN ARC / IZU ARC / HACHIJOJIMA/HATIZYO-ZIMA / PACIFIC OCEAN	VOLCANIC ROCK	THOLEIITE	5	Arc	WHOLE ROCK	1.03	6173.29			18.9	22.4	0.25	0.9	3.14	3.6	1.56	0.71	2.22	2.88	2.04	1.82	0.29	0.69	0.058
2008	[12151] ISHIZUKA O. (2008)	samp. DIVE308 4-1	IZU-BONIN ARC / IZU ARC / HACHIJOJIMA/HATIZYO-ZIMA / PACIFIC OCEAN	VOLCANIC ROCK	THOLEIITE	5	Arc	WHOLE ROCK	1.03	6173.29			19.1	22.2	0.22	0.91	3.15	3.58	1.58	0.75	2.22	3.03	2.02	1.92	0.28	0.67	0.048
2008	[12151] ISHIZUKA O. (2008)	samp. DIVE308 4-3	IZU-BONIN ARC / IZU ARC / HACHIJOJIMA/HATIZYO-ZIMA / PACIFIC OCEAN	VOLCANIC ROCK	THOLEIITE	5	Arc	WHOLE ROCK	1.04	6233.23			18.8	22.6	0.24	0.89	3.14	3.66	1.57	0.81	2.33	3.07	2.05	1.96	0.3	0.68	0.053
2008	[12151] ISHIZUKA O. (2008)	samp. 03103001A	IZU-BONIN ARC / IZU ARC / HACHIJOJIMA/HATIZYO-ZIMA / HACHIJOJIMA NISHIYAMA/HATIZYO-ZIMA NISI-YAMA / PACIFIC OCEAN	VOLCANIC ROCK	THOLEIITE	5	Arc	WHOLE ROCK	1.07	6413.03			26.9	49.4	0.48	2.14	6.72	6.68	2.73	0.95	3.6	4.29	2.81	2.71	0.42	1.42	0.16
2008	[12151] ISHIZUKA O. (2008)	samp. 03103111	IZU-BONIN ARC / IZU ARC / HACHIJOJIMA/HATIZYO-ZIMA / HACHIJOJIMA NISHIYAMA/HATIZYO-ZIMA NISI-YAMA / PACIFIC OCEAN	VOLCANIC ROCK	THOLEIITE	5	Arc	WHOLE ROCK	1.19	7132.25			30.1	52.7	0.49	2.23	7.07	6.88	2.69	0.98	3.69	4.58	2.9	2.86	0.43	1.47	0.162
2008	[12151] ISHIZUKA O. (2008)	samp. 03102810	IZU-BONIN ARC / IZU ARC / HACHIJOJIMA/HATIZYO-ZIMA / HACHIJOJIMA NISHIYAMA/HATIZYO-ZIMA NISI-YAMA / PACIFIC OCEAN	VOLCANIC ROCK	THOLEIITE	5	Arc	WHOLE ROCK	1.19	7132.25			31.4	55.9	0.54	2.34	7.57	7.52	2.93	1.08	4.07	4.92	3.31	3	0.46	2.01	0.157
2008	[12151] ISHIZUKA O. (2008)	samp. 03103002	IZU-BONIN ARC / IZU ARC / HACHIJOJIMA/HATIZYO-ZIMA / HACHIJOJIMA NISHIYAMA/HATIZYO-ZIMA NISI-YAMA / PACIFIC OCEAN	VOLCANIC ROCK	THOLEIITE	5	Arc	WHOLE ROCK	1.2	7192.19			30.2	55.9	0.52	2.25	7.54	7.33	2.8	1.06	3.85	4.62	3.46	2.92	0.44	1.44	0.157
2008	[12151] ISHIZUKA O. (2008)	samp. 03103105A	IZU-BONIN ARC / IZU ARC / HACHIJOJIMA/HATIZYO-ZIMA / HACHIJOJIMA NISHIYAMA/HATIZYO-ZIMA NISI-YAMA / PACIFIC OCEAN	VOLCANIC ROCK	THOLEIITE	5	Arc	WHOLE ROCK	1.2	7192.19			29.6	54.7	0.55	2.27	7.64	7.26	2.89	1.03	3.88	4.79	3.12	2.97	0.45	1.62	0.171
2008	[12151] ISHIZUKA O. (2008)	samp. 03103004	IZU-BONIN ARC / IZU ARC / HACHIJOJIMA/HATIZYO-ZIMA / HACHIJOJIMA NISHIYAMA/HATIZYO-ZIMA NISI-YAMA / PACIFIC OCEAN	VOLCANIC ROCK	THOLEIITE	5	Arc	WHOLE ROCK	1.23	7371.99			25.7	46.1	0.41	1.73	6.13	5.89	2.3	0.92	3.31	4.04	2.66	2.61	0.4	1.86	0.13
2008	[12151] ISHIZUKA O. (2008)	samp. 03103108	IZU-BONIN ARC / IZU ARC / HACHIJOJIMA/HATIZYO-ZIMA / HACHIJOJIMA NISHIYAMA/HATIZYO-ZIMA NISI-YAMA / PACIFIC OCEAN	VOLCANIC ROCK	THOLEIITE	5	Arc	WHOLE ROCK	1.23	7371.99			31.2	60	0.57	2.31	7.91	7.73	2.93	1.12	4.1	5.07	3.25	3.14	0.49	1.75	0.174
2008	[12151] ISHIZUKA O. (2008)	samp. KT03-8 D14-5	IZU-BONIN ARC / IZU ARC / HACHIJOJIMA/HATIZYO-ZIMA / PACIFIC OCEAN	VOLCANIC ROCK	THOLEIITE	5	Arc	WHOLE ROCK	1.24	7431.93			25.6	34.2	0.37	1.73	5.45	5.97	2.49	0.94	3.44	4.17	2.78	2.62	0.38	1.22	0.115
2008	[12151] ISHIZUKA O. (2008)	samp. 03103005	IZU-BONIN ARC / IZU ARC / HACHIJOJIMA/HATIZYO-ZIMA / HACHIJOJIMA NISHIYAMA/HATIZYO-ZIMA NISI-YAMA / PACIFIC OCEAN	VOLCANIC ROCK	THOLEIITE	5	Arc	WHOLE ROCK	1.25	7491.86			24.9	48.8	0.48	1.59	5.76	5.59	2.24	0.97	3.29	4.07	2.72	2.69	0.44	1.47	0.141
2008	[12151] ISHIZUKA O. (2008)	samp. KR0401 D21-3	IZU-BONIN ARC / IZU ARC / HACHIJOJIMA/HATIZYO-ZIMA / PACIFIC OCEAN	VOLCANIC ROCK	THOLEIITE	5	Arc	WHOLE ROCK	1.26	7551.8			28	45.4	0.48	2.07	6.42	6.37	2.57	0.98	3.46	4.21	2.74	2.74	0.42	1.34	0.154
2008	[12151] ISHIZUKA O. (2008)	samp. KR0401 D21-6	IZU-BONIN ARC / IZU ARC / HACHIJOJIMA/HATIZYO-ZIMA / PACIFIC OCEAN	VOLCANIC ROCK	THOLEIITE	5	Arc	WHOLE ROCK	1.28	7671.67			29	45.9	0.47	2.12	6.63	6.4	2.68	1	3.63	4.34	2.75	2.66	0.41	1.24	0.172
2008	[12151] ISHIZUKA O. (2008)	samp. KT03-8 D14-3	IZU-BONIN ARC / IZU ARC / HACHIJOJIMA/HATIZYO-ZIMA / PACIFIC OCEAN	VOLCANIC ROCK	THOLEIITE	5	Arc	WHOLE ROCK	1.29	7731.6			27	41.2	0.39	1.71	5.67	5.69	2.21	0.96	3.32	4.29	2.81	2.65	0.41	1.18	0.09
2008	[12151] ISHIZUKA O. (2008)	samp. 03103102A	IZU-BONIN ARC / IZU ARC / HACHIJOJIMA/HATIZYO-ZIMA / HACHIJOJIMA NISHIYAMA/HATIZYO-ZIMA NISI-YAMA / PACIFIC OCEAN	VOLCANIC ROCK	THOLEIITE	5	Arc	WHOLE ROCK	1.31	7851.47			32.1	57.4	0.55	2.52	8.03	7.95	3.18	1.1	4.34	5.2	3.37	3.19	0.49	1.67	0.18
2008	[12151] ISHIZUKA O. (2008)	samp. 03102812A	IZU-BONIN ARC / IZU ARC / HACHIJOJIMA/HATIZYO-ZIMA / HACHIJOJIMA NISHIYAMA/HATIZYO-ZIMA NISI-YAMA / PACIFIC OCEAN	VOLCANIC ROCK	THOLEIITE	5	Arc	WHOLE ROCK	1.31	7851.47			34.5	61.5	0.53	2.55	8.11	8.37	3.12	1.12	4.23	5.37	3.39	3.3	0.48	1.76	0.18
2008	[12151] ISHIZUKA O. (2008)	samp. KT03-8 D16-5	IZU-BONIN ARC / IZU ARC / HACHIJOJIMA/HATIZYO-ZIMA / PACIFIC OCEAN	VOLCANIC ROCK	THOLEIITE	5	Arc	WHOLE ROCK	1.32	7911.41			33.9	62.2	0.56	2.64	8.07	8.32	3.2	1.17	4.41	5.28	3.42	3.33	0.5	1.68	0.207
2008	[12151] ISHIZUKA O. (2008)	samp. KT03-8 D14-2	IZU-BONIN ARC / IZU ARC / HACHIJOJIMA/HATIZYO-ZIMA / PACIFIC OCEAN	VOLCANIC ROCK	THOLEIITE	5	Arc	WHOLE ROCK	1.34	8031.28			24	33.9	0.37	1.64	5.29	5.97	2.46	0.84	3.53	4.03	2.7	2.56	0.39	1.2	0.116
2008	[12151] ISHIZUKA O. (2008)	samp. KT03-8 D16-2	IZU-BONIN ARC / IZU ARC / HACHIJOJIMA/HATIZYO-ZIMA / PACIFIC OCEAN	VOLCANIC ROCK	THOLEIITE	5	Arc	WHOLE ROCK	1.34	8031.28			34.9	63.4	0.56	2.73	8.31	8.46	3.29	1.18	4.6	5.53	3.49	3.31	0.52	1.67	0.21
2008	[12151] ISHIZUKA O. (2008)	samp. KT03-8 D16-1	IZU-BONIN ARC / IZU ARC / HACHIJOJIMA/HATIZYO-ZIMA / PACIFIC OCEAN	VOLCANIC ROCK	THOLEIITE	5	Arc	WHOLE ROCK	1.34	8031.28			34	62.2	0.56	2.52	8.22	8.18	3.11	1.13	4.24	5.39	3.43	3.35	0.53	1.77	0.166
2008	[12151] ISHIZUKA O. (2008)	samp. KT03-8 D16-3	IZU-BONIN ARC / IZU ARC / HACHIJOJIMA/HATIZYO-ZIMA / PACIFIC OCEAN	VOLCANIC ROCK	THOLEIITE	5	Arc	WHOLE ROCK	1.35	8091.21			33.1	61.8	0.55	2.57	8.14	8.03	3.02	1.12	4.27	5.4	3.44	3.32	0.51	1.76	0.168
2008	[12151] ISHIZUKA O. (2008)	samp. 03103009	IZU-BONIN ARC / IZU ARC / HACHIJOJIMA/HATIZYO-ZIMA / HACHIJOJIMA NISHIYAMA/HATIZYO-ZIMA NISI-YAMA / PACIFIC OCEAN	VOLCANIC ROCK	THOLEIITE	5	Arc	WHOLE ROCK	1.35	8091.21			33.7	62	0.56	2.56	8.14	8.4	3.14	1.12	4.27	5.36	3.36	3.42	0.5	1.86	0.184
2008	[12151] ISHIZUKA O. (2008)	samp. KT03-8 D16-11	IZU-BONIN ARC / IZU ARC / HACHIJOJIMA/HATIZYO-ZIMA / PACIFIC OCEAN	VOLCANIC ROCK	THOLEIITE	5	Arc	WHOLE ROCK	1.38	8271.01			35.4	60.8	0.58	2.47	7.94	8.43	3.16	1.14	4.12	5.18	3.38	3.11	0.48	1.63	0.165
2008	[12151] ISHIZUKA O. (2008)	samp. 03102813A	IZU-BONIN ARC / IZU ARC / HACHIJOJIMA/HATIZYO-ZIMA / HACHIJOJIMA NISHIYAMA/HATIZYO-ZIMA NISI-YAMA / PACIFIC OCEAN	VOLCANIC ROCK	THOLEIITE	5	Arc	WHOLE ROCK	1.38	8271.01			35.8	63.9	0.62	2.74	8.69	8.43	3.13	1.23	4.59	5.54	3.63	3.37	0.51	1.69	0.18
2008	[12151] ISHIZUKA O. (2008)	samp. 03103007	IZU-BONIN ARC / IZU ARC / HACHIJOJIMA/HATIZYO-ZIMA / HACHIJOJIMA NISHIYAMA/HATIZYO-ZIMA NISI-YAMA / PACIFIC OCEAN	VOLCANIC ROCK	THOLEIITE	5	Arc	WHOLE ROCK	1.38	8271.01			35.8	58.8	0.6	2.66	8.72	8.58	3.44	1.23	4.48	5.68	3.51	3.42	0.53	1.75	0.201
2008	[12151] ISHIZUKA O. (2008)	samp. KT03-8 D16-8	IZU-BONIN ARC / IZU ARC / HACHIJOJIMA/HATIZYO-ZIMA / PACIFIC OCEAN	VOLCANIC ROCK	THOLEIITE	5	Arc	WHOLE ROCK	1.39	8330.95			36.1	60.4	0.63	2.57	8.03	8.29	3.21	1.17	4.18	5.28	3.42	3.02	0.48	1.58	0.176
2008	[12151] ISHIZUKA O. (2008)	samp. KT03-8 D16-4	IZU-BONIN ARC / IZU ARC / HACHIJOJIMA/HATIZYO-ZIMA / PACIFIC OCEAN	VOLCANIC ROCK	THOLEIITE	5	Arc	WHOLE ROCK	1.39	8330.95			31.8	52.4	0.41	2.44	7.96	7.84	3.02	1.09	4.14	4.94	3.34	3.24	0.48	1.63	0.172
2008	[12151] ISHIZUKA O. (2008)	samp. KT03-8 D16-6	IZU-BONIN ARC / IZU ARC / HACHIJOJIMA/HATIZYO-ZIMA / PACIFIC OCEAN	VOLCANIC ROCK	THOLEIITE	5	Arc	WHOLE ROCK	1.39	8330.95			35.8	63.1	0.63	2.65	8.47	9.02	3.42	1.22	4.54	6.07	3.88	3.55	0.56	1.83	0.173
2008	[12151] ISHIZUKA O. (2008)	samp. 03102807	IZU-BONIN ARC / IZU ARC / HACHIJOJIMA/HATIZYO-ZIMA / HACHIJOJIMA NISHIYAMA/HATIZYO-ZIMA NISI-YAMA / PACIFIC OCEAN	VOLCANIC ROCK	THOLEIITE	5	Arc	WHOLE ROCK	1.39	8330.95			35.4	61.8	0.57	2.76	8.75	8.76	3.51	1.23	4.79	5.62	3.62	3.58	0.54	1.85	0.195
2008	[12151] ISHIZUKA O. (2008)	samp. 03103012A	IZU-BONIN ARC / IZU ARC / HACHIJOJIMA/HATIZYO-ZIMA / HACHIJOJIMA NISHIYAMA/HATIZYO-ZIMA NISI-YAMA / PACIFIC OCEAN	VOLCANIC ROCK	THOLEIITE	5	Arc	WHOLE ROCK	1.39	8330.95			38.4	71.8	0.66	2.93	9.28	9.54	3.59	1.24	5.03	6.07	3.8	3.71	0.59	2.01	0.219
2008	[12151] ISHIZUKA O. (2008)	samp. 03103107	IZU-BONIN ARC / IZU ARC / HACHIJOJIMA/HATIZYO-ZIMA / HACHIJOJIMA NISHIYAMA/HATIZYO-ZIMA NISI-YAMA / PACIFIC OCEAN	VOLCANIC ROCK	THOLEIITE	5	Arc	WHOLE ROCK	1.39	8330.95			37.6	64.9	0.62	2.78	9.12	8.95	3.48	1.15	4.73	5.71	3.99	3.72	0.55	1.89	0.2
2008	[12151] ISHIZUKA O. (2008)	samp. 03103106	IZU-BONIN ARC / IZU ARC / HACHIJOJIMA/HATIZYO-ZIMA / HACHIJOJIMA NISHIYAMA/HATIZYO-ZIMA NISI-YAMA / PACIFIC OCEAN	VOLCANIC ROCK	THOLEIITE	5	Arc	WHOLE ROCK	1.4	8390.88			35.8	61.1	0.48	2.77	8.8	9.1	3.4	1.15	4.68	5.59	3.65	3.6	0.55	2	0.198
2008	[12151] ISHIZUKA O. (2008)	samp. 03102815	IZU-BONIN ARC / IZU ARC / HACHIJOJIMA/HATIZYO-ZIMA / HACHIJOJIMA NISHIYAMA/HATIZYO-ZIMA NISI-YAMA / PACIFIC OCEAN	VOLCANIC ROCK	THOLEIITE	5	Arc	WHOLE ROCK	1.41	8450.82			34.6	62.8	0.61	2.68	8.56	8.6	3.35	1.27	4.55	5.6	3.73	3.36	0.53	2.21	0.2
2008	[12151] ISHIZUKA O. (2008)	samp. 03103101A	IZU-BONIN ARC / IZU ARC / HACHIJOJIMA/HATIZYO-ZIMA / HACHIJOJIMA NISHIYAMA/HATIZYO-ZIMA NISI-YAMA / PACIFIC OCEAN	VOLCANIC ROCK	THOLEIITE	5	Arc	WHOLE ROCK	1.45	8690.56			37.3	65.1	0.62	2.79	8.94	9.47	3.61	1.27	5.01	5.96	3.88	3.8	0.57	1.97	0.202
2008	[12151] ISHIZUKA O. (2008)	samp. KR04-01 D15-109	IZU-BONIN ARC / IZU ARC / HACHIJOJIMA/HATIZYO-ZIMA / PACIFIC OCEAN	VOLCANIC ROCK	THOLEIITE	5	Arc	WHOLE ROCK	1.55	9289.91			29	41.4	0.31	1.72	5.66	6.12	2.43	0.96	3.67	4.6	3.14	2.89	0.48	1.24	0.099
2008	[12151] ISHIZUKA O. (2008)	samp. KR04-01 D15-101	IZU-BONIN ARC / IZU ARC / HACHIJOJIMA/HATIZYO-ZIMA / PACIFIC OCEAN	VOLCANIC ROCK	THOLEIITE	5	Arc	WHOLE ROCK	1.55	9289.91			32.7	48	0.36	1.79	6.32	6.62	2.68	1.13	3.81	4.94	3.2	3.11	0.47	1.3	0.11
2008	[12151] ISHIZUKA O. (2008)	samp. KR04-01 D15-105	IZU-BONIN ARC / IZU ARC / HACHIJOJIMA/HATIZYO-ZIMA / PACIFIC OCEAN	VOLCANIC ROCK	THOLEIITE	5	Arc	WHOLE ROCK	1.55	9289.91			31.6	47.6	0.44	1.85	6.3	6.25	2.56	1.15	3.93	4.82	3.01	3.25	0.47	1.43	0.122
2008	[12151] ISHIZUKA O. (2008)	samp. KR04-01 D15-102	IZU-BONIN ARC / IZU ARC / HACHIJOJIMA/HATIZYO-ZIMA / PACIFIC OCEAN	VOLCANIC ROCK	THOLEIITE	5	Arc	WHOLE ROCK	1.55	9289.91			32.4	45.8	0.39	1.77	6.11	6.75	2.73	1.22	4.06	5.1	3.31	3.31	0.51	1.38	0.117
2008	[12151] ISHIZUKA O. (2008)	samp. KR04-01 D15-103	IZU-BONIN ARC / IZU ARC / HACHIJOJIMA/HATIZYO-ZIMA / PACIFIC OCEAN	VOLCANIC ROCK	THOLEIITE	5	Arc	WHOLE ROCK	1.57	9409.78			31.8	44.9	0.39	1.71	6.2	6.68	2.9	1.22	4.11	5.12	3.32	3.17	0.48	1.4	0.12
2008	[12151] ISHIZUKA O. (2008)	samp. KR04-01 D15-106	IZU-BONIN ARC / IZU ARC / HACHIJOJIMA/HATIZYO-ZIMA / PACIFIC OCEAN	VOLCANIC ROCK	THOLEIITE	5	Arc	WHOLE ROCK	1.57	9409.78			32.8	47.8	0.39	1.84	6.2	7.07	3.07	1.19	4.29	5.37	3.42	3.34	0.52	1.95	0.124
2008	[12151] ISHIZUKA O. (2008)	samp. 03102804	IZU-BONIN ARC / IZU ARC / HACHIJOJIMA/HATIZYO-ZIMA / HACHIJOJIMA NISHIYAMA/HATIZYO-ZIMA NISI-YAMA / PACIFIC OCEAN	VOLCANIC ROCK	THOLEIITE	5	Arc	WHOLE ROCK	1.6	9589.58			41.6	74.9	0.68	3.23	10.3	10.39	4.05	1.35	5.55	6.7	4.45	4.23	0.65	2.14	0.227
2006	[10884] ISHIZUKA O. (2006)	samp. 1181-1,9801-1, U99061	IZU-BONIN ARC / NORTHERN BACK-ARC REGION / HYOTAN-SE BANK / PACIFIC OCEAN	VOLCANIC ROCK	ANDESITE	12	Back Arc	WHOLE ROCK	0.7	4195.44		164	32.6	110.2	1.66	4.42	12.47	10.11	2.87	0.96	3.7	4.69	3.07	3.1	0.5	2.51	0.66
2006	[10884] ISHIZUKA O. (2006)	samp. 1181-2	IZU-BONIN ARC / NORTHERN BACK-ARC REGION / HYOTAN-SE BANK / PACIFIC OCEAN	VOLCANIC ROCK	ANDESITE	12	Back Arc	WHOLE ROCK	0.72	4315.31		180	23.6	66.6	4.31	7.92	17.89	11.09	2.78	0.97	3.21	3.44	2.2	2.11	0.34	1.62	1.52
2006	[10884] ISHIZUKA O. (2006)	samp. 1181-4	IZU-BONIN ARC / NORTHERN BACK-ARC REGION / HYOTAN-SE BANK / PACIFIC OCEAN	VOLCANIC ROCK	ANDESITE	12	Back Arc	WHOLE ROCK	0.76	4555.05		177	27.2	70.4	2.19	6.44	16.24	11.24	3.22	1.13	3.74	3.96	2.5	2.49	0.38	1.74	1.15
2006	[10884] ISHIZUKA O. (2006)	samp. 1181-6	IZU-BONIN ARC / NORTHERN BACK-ARC REGION / HYOTAN-SE BANK / PACIFIC OCEAN	VOLCANIC ROCK	ANDESITE	12	Back Arc	WHOLE ROCK	0.74	4435.18		169	29.8	96.8	1.41	4.33	12.29	9.75	2.85	0.93	3.35	4.38	2.86	2.78	0.44	2.43	0.47
2006	[10884] ISHIZUKA O. (2006)	samp. 1181-7	IZU-BONIN ARC / NORTHERN BACK-ARC REGION / HYOTAN-SE BANK / PACIFIC OCEAN	VOLCANIC ROCK	ANDESITE	12	Back Arc	WHOLE ROCK	0.74	4435.18		185	30.1	96.4	1.42	4.43	12.24	10.03	2.9	0.96	3.49	4.42	2.97	3.04	0.47	2.39	0.49
2006	[10884] ISHIZUKA O. (2006)	samp. 1186-2,9703-1, U98491	IZU-BONIN ARC / NORTHERN BACK-ARC REGION / IZU SPUR / PACIFIC OCEAN	VOLCANIC ROCK	ANDESITE	12	Back Arc	WHOLE ROCK	0.83	4974.6		190	35.8	158	4.33	9.54	24.92	15.47	4.1	1.12	4.77	5.53	3.68	3.8	0.6	4.01	3.06
2003	[14066] ISHIZUKA O. (2003)	samp. 837-6	IZU-BONIN ARC / NORTHERN BACK-ARC REGION / ZENISU RIDGE / PACIFIC OCEAN	VOLCANIC ROCK	ANDESITE	12	Back Arc	WHOLE ROCK	0.84	5034.53			41.3	78.2	0.79	2.95	9.1	9.34	3.11	1.24	4.34	5.82	3.78	3.74	0.6	1.99	0.29
2006	[10884] ISHIZUKA O. (2006)	samp. 1189-17	IZU-BONIN ARC / NORTHERN BACK-ARC REGION / TOSHIMA HOLE / PACIFIC OCEAN	VOLCANIC ROCK	ANDESITE, BASALTIC	13	Back Arc	WHOLE ROCK	0.77	4614.99		211	22.1	87.5	2.93	7.49	19.23	12.83	2.95	1.01	3.15	3.34	2.06	2.02	0.33	1.97	0.86
2006	[10884] ISHIZUKA O. (2006)	samp. 1184-11,9703-1, U98489	IZU-BONIN ARC / NORTHERN BACK-ARC REGION / ZENISU RIDGE / PACIFIC OCEAN	VOLCANIC ROCK	ANDESITE, BASALTIC	13	Back Arc	WHOLE ROCK	0.8	4794.79		205	32	95.1	2.66	6.76	17.56	13.04	3.44	1.14	4.07	4.76	3.05	3.02	0.48	2.36	1.39
2006	[10884] ISHIZUKA O. (2006)	samp. #5211-2	IZU-BONIN ARC / NORTHERN BACK-ARC REGION / ZENISU RIDGE / PACIFIC OCEAN	VOLCANIC ROCK	ANDESITE, BASALTIC	13	Back Arc	WHOLE ROCK	0.82	4914.66			25	66.1	2.5	7.17	16.87	11.99	3.15	1.11	3.63	3.94	2.49	2.47	0.38	1.69	1.34
2006	[10884] ISHIZUKA O. (2006)	samp. 1188-3	IZU-BONIN ARC / NORTHERN BACK-ARC REGION / OTOYAMA-DASHI NE KNOLL / PACIFIC OCEAN	VOLCANIC ROCK	BASALT	14	Back Arc	WHOLE ROCK	0.98	5873.62		318	17.6	59.1	3.3	5.47	13.81	9.86	2.4	0.89	2.69	2.85	1.76	1.64	0.25	1.38	0.83
2006	[10884] ISHIZUKA O. (2006)	samp. 1189-15	IZU-BONIN ARC / NORTHERN BACK-ARC REGION / TOSHIMA HOLE / PACIFIC OCEAN	VOLCANIC ROCK	BASALT	14	Back Arc	WHOLE ROCK	0.94	5633.88		296	19.4	62.4	1.99	4.79	12.42	9.15	2.32	0.89	2.7	3.1	1.95	1.86	0.3	1.49	0.54
2010	[14052] TOLLSTRUP D. L.(2010) [GeoReM [5550] ]	samp. 1891-7	IZU-BONIN ARC / SUMISU RIFT / PACIFIC OCEAN	VOLCANIC ROCK	BASALT	14	Back Arc	WHOLE ROCK					21	55.7	1.23	3.98	10.58	9.45	2.91	1.06	3.45	3.7	2.4	2.18	0.33	1.51	0.338
2010	[14052] TOLLSTRUP D. L.(2010) [GeoReM [5550] ]	samp. 1894-9	IZU-BONIN ARC / SUMISU RIFT / PACIFIC OCEAN	VOLCANIC ROCK	BASALT	14	Back Arc	WHOLE ROCK					18.6	44.6	0.75	2.45	6.87	6.73	2.22	0.82	2.7	2.94	1.91	1.72	0.26	1.28	0.228
2010	[14052] TOLLSTRUP D. L.(2010) [GeoReM [5550] ]	samp. 1896-3	IZU-BONIN ARC / SUMISU RIFT / PACIFIC OCEAN	VOLCANIC ROCK	BASALT	14	Back Arc	WHOLE ROCK					30.1	81	2.29	4.18	10.97	9.3	2.76	0.92	3.07	3.36	2.16	2	0.3	2.09	0.73
2010	[14052] TOLLSTRUP D. L.(2010) [GeoReM [5550] ]	samp. 1896-7	IZU-BONIN ARC / SUMISU RIFT / PACIFIC OCEAN	VOLCANIC ROCK	BASALT	14	Back Arc	WHOLE ROCK					23	59.3	1.12	6.01	15.57	12.96	3.87	1.44	4.64	4.84	3.07	2.77	0.41	1.6	0.605
2010	[14052] TOLLSTRUP D. L.(2010) [GeoReM [5550] ]	samp. 9-6	IZU-BONIN ARC / BACK ARC KNOLLS / DREDGE MWD9 / PACIFIC OCEAN	VOLCANIC ROCK	BASALT	14	Back Arc	WHOLE ROCK			47.1	323.2	19.3	35.8	0.73	2.59	7.63	7.48	2.31	0.88	2.88	3.11	1.91	1.7	0.25	0.98	0.133
2010	[14052] TOLLSTRUP D. L.(2010) [GeoReM [5550] ]	samp. 26-3	IZU-BONIN ARC / BACK ARC KNOLLS / DREDGE MWD26 / PACIFIC OCEAN	VOLCANIC ROCK	BASALT	14	Back Arc	WHOLE ROCK	0.66	3955.7	39.7	258.9	16.9	38.5	1.38	5.46	11.59	8.22	2.24	0.77	2.6	2.7	1.72	1.6	0.24	1.04	0.779
2010	[14052] TOLLSTRUP D. L.(2010) [GeoReM [5550] ]	samp. 27-11	IZU-BONIN ARC / BACK ARC KNOLLS / DREDGE MWD27 / PACIFIC OCEAN	VOLCANIC ROCK	BASALT	14	Back Arc	WHOLE ROCK	0.89	5334.21	41	332.8	15.9	29.1	0.56	2.03	5.46	5.17	1.71	0.68	2.19	2.56	1.62		0.23	0.82	0.143
2010	[14052] TOLLSTRUP D. L.(2010) [GeoReM [5550] ]	samp. 29-3	IZU-BONIN ARC / BACK ARC KNOLLS / DREDGE MWD29 / PACIFIC OCEAN	VOLCANIC ROCK	BASALT	14	Back Arc	WHOLE ROCK	0.92	5514.01	46.8	285.7	23.4	61.7	1.61	6.55	15.43	12.15	3.28	1.08	3.45	3.61	2.23	2.12	0.33	1.64	0.729
2010	[14052] TOLLSTRUP D. L.(2010) [GeoReM [5550] ]	samp. 31-4	IZU-BONIN ARC / BACK ARC KNOLLS / DREDGE MWD31 / PACIFIC OCEAN	VOLCANIC ROCK	BASALT	14	Back Arc	WHOLE ROCK	1.13	6772.64	36.2	300.4	21.4	62.3	1.42	3.76	10.16	8.62	2.56	0.95	3.16	3.49	2.17	1.97	0.3	1.52	0.304
2010	[14052] TOLLSTRUP D. L.(2010) [GeoReM [5550] ]	samp. 31-7	IZU-BONIN ARC / BACK ARC KNOLLS / DREDGE MWD31 / PACIFIC OCEAN	VOLCANIC ROCK	BASALT	14	Back Arc	WHOLE ROCK	1.12	6712.71	47	307.9	21.9	63.6	1.68	3.84	10.43	8.77	2.7	0.98	3.21	3.48	2.12	1.95	0.3	1.5	0.325
2010	[14052] TOLLSTRUP D. L.(2010) [GeoReM [5550] ]	samp. 33-1	IZU-BONIN ARC / BACK ARC KNOLLS / DREDGE MWD33 / PACIFIC OCEAN	VOLCANIC ROCK	BASALT	14	Back Arc	WHOLE ROCK		0	56.7	310	16.2	27.2	0.44	3.93	8.75	6.98	1.9	0.66	2.23	2.48	1.6	1.42	0.21	0.78	0.308
2010	[14052] TOLLSTRUP D. L.(2010) [GeoReM [5550] ]	samp. 33-5	IZU-BONIN ARC / BACK ARC KNOLLS / DREDGE MWD33 / PACIFIC OCEAN	VOLCANIC ROCK	BASALT	14	Back Arc	WHOLE ROCK	0.73	4375.25	50.8	327.7	16.7	31.6	0.48	4.28	9.84	7.62	2.03	0.71	2.4	2.68	1.65	1.53	0.23	0.89	0.302
2010	[14052] TOLLSTRUP D. L.(2010) [GeoReM [5550] ]	samp. 34-6	IZU-BONIN ARC / BACK ARC KNOLLS / DREDGE MWD34 / PACIFIC OCEAN	VOLCANIC ROCK	BASALT	14	Back Arc	WHOLE ROCK	0.98	5873.62	46.7	307.1	19.5	53.5	0.81	3.62	9.62	7.89	2.31	0.84	2.8	3.05	1.89	1.71	0.26	1.25	0.252
2010	[14052] TOLLSTRUP D. L.(2010) [GeoReM [5550] ]	samp. 35-3	IZU-BONIN ARC / BACK ARC KNOLLS / DREDGE MWD35 / PACIFIC OCEAN	VOLCANIC ROCK	BASALT	14	Back Arc	WHOLE ROCK	1.33	7971.34	46.9	342.5	26.9	80.9	1.51	4.5	12.71	10.71	3.32	1.21	4.03	4.29	2.61	2.38	0.35	1.87	0.35
2010	[14052] TOLLSTRUP D. L.(2010) [GeoReM [5550] ]	samp. 36-1	IZU-BONIN ARC / BACK ARC KNOLLS / DREDGE MWD36 / PACIFIC OCEAN	VOLCANIC ROCK	BASALT	14	Back Arc	WHOLE ROCK	1.07	6413.03	47.3	319.1	22	61	1.55	3.6	9.93	8.55	2.63	1	3.31	3.58	2.13	1.98	0.29	1.49	0.25
2010	[14052] TOLLSTRUP D. L.(2010) [GeoReM [5550] ]	samp. 37-2	IZU-BONIN ARC / BACK ARC KNOLLS / DREDGE MWD37 / PACIFIC OCEAN	VOLCANIC ROCK	BASALT	14	Back Arc	WHOLE ROCK	1.04	6233.23	39.9	289	21.5	52.2	1.13	3.38	9.16	8.01	2.48	0.92	3.09	3.43	2.07	1.91	0.29	1.32	0.529
2010	[14052] TOLLSTRUP D. L.(2010) [GeoReM [5550] ]	samp. 52-1	IZU-BONIN ARC / BACK ARC KNOLLS / DREDGE MWD52 / PACIFIC OCEAN	VOLCANIC ROCK	BASALT	14	Back Arc	WHOLE ROCK	0.69	4135.51	39.7	252.5	20.9	57.4	0.68	2.99	8.08	6.64	2.07	0.76	2.68	3.12	2.07	2.04	0.31	1.5	0.288
2010	[14052] TOLLSTRUP D. L.(2010) [GeoReM [5550] ]	samp. 53-4	IZU-BONIN ARC / BACK ARC KNOLLS / DREDGE MWD53 / PACIFIC OCEAN	VOLCANIC ROCK	BASALT	14	Back Arc	WHOLE ROCK	1.32	7911.41	57.5	406.1	24.8	41.3	1.1	2.95	8.21	8.2	2.72	1.07	3.52	3.93	2.47	2.24	0.34	1.19	0.25
2010	[14052] TOLLSTRUP D. L.(2010) [GeoReM [5550] ]	samp. 54-2	IZU-BONIN ARC / BACK ARC KNOLLS / DREDGE MWD54 / PACIFIC OCEAN	VOLCANIC ROCK	BASALT	14	Back Arc	WHOLE ROCK	0.97	5813.68	60.2	355.3	15.6	28.5	0.64	4.71	11.31	8.77	2.31	0.82	2.52	2.54	1.45	1.35	0.2	0.77	0.451
2010	[14052] TOLLSTRUP D. L.(2010) [GeoReM [5550] ]	samp. 55-2	IZU-BONIN ARC / BACK ARC KNOLLS / DREDGE MWD55 / PACIFIC OCEAN	VOLCANIC ROCK	BASALT	14	Back Arc	WHOLE ROCK	0.95	5693.81	47	284.1	20.1	54.7	1.65	4.87	12.06	9.13	2.66	0.91	2.97	3.18	1.93	1.82	0.28	1.33	0.561
2010	[14052] TOLLSTRUP D. L.(2010) [GeoReM [5550] ]	samp. 59-7	IZU-BONIN ARC / BACK ARC KNOLLS / DREDGE MWD59 / PACIFIC OCEAN	VOLCANIC ROCK	BASALT	14	Back Arc	WHOLE ROCK	1.12	6712.71	46.8	354.8	20.6	34	0.68	2.45	7.31	7.35	2.38	0.95	2.9	3.3	1.96	1.73	0.26	0.97	0.1
2010	[14052] TOLLSTRUP D. L.(2010) [GeoReM [5550] ]	samp. 62-3	IZU-BONIN ARC / BACK ARC KNOLLS / DREDGE MWD62 / PACIFIC OCEAN	VOLCANIC ROCK	BASALT	14	Back Arc	WHOLE ROCK			48.3	438.1	29.9	68.3	2.05	7.12	17.77	14.85	4.32	1.45	4.69	4.8	2.85	2.55	0.38	1.73	0.763
2010	[14052] TOLLSTRUP D. L.(2010) [GeoReM [5550] ]	samp. 63-8	IZU-BONIN ARC / BACK ARC KNOLLS / DREDGE MWD63 / PACIFIC OCEAN	VOLCANIC ROCK	BASALT	14	Back Arc	WHOLE ROCK			48.4	362.3	20.1	40.9	1.33	5.55	13.4	10.45	2.92	0.96	3.24	3.27	1.9	1.72	0.25	1.1	0.654
2010	[14052] TOLLSTRUP D. L.(2010) [GeoReM [5550] ]	samp. 64-2	IZU-BONIN ARC / BACK ARC KNOLLS / DREDGE MWD64 / PACIFIC OCEAN	VOLCANIC ROCK	BASALT	14	Back Arc	WHOLE ROCK	0.91	5454.08	60.7	339.4	18.5	41.5	1.82	4.55	10.67	8.64	2.43	0.83	2.77	2.89	1.7	1.57	0.24	1.14	0.495
2010	[14052] TOLLSTRUP D. L.(2010) [GeoReM [5550] ]	samp. 64-4	IZU-BONIN ARC / BACK ARC KNOLLS / DREDGE MWD64 / PACIFIC OCEAN	VOLCANIC ROCK	BASALT	14	Back Arc	WHOLE ROCK	0.88	5274.27	49.1	330.6	17.4	39.5	1.42	4.12	10.01	8.13	2.32	0.8	2.57	2.67	1.62	1.49	0.22	1.04	0.428
2010	[14052] TOLLSTRUP D. L.(2010) [GeoReM [5550] ]	samp. 64-7	IZU-BONIN ARC / BACK ARC KNOLLS / DREDGE MWD64 / PACIFIC OCEAN	VOLCANIC ROCK	BASALT	14	Back Arc	WHOLE ROCK	0.9	5394.14	48.2	318.2	17.6	43.3	1.5	4.39	10.88	8.43	2.4	0.81	2.74	2.88	1.68	1.54	0.23	1.11	0.496
2010	[14052] TOLLSTRUP D. L.(2010) [GeoReM [5550] ]	samp. 67-3	IZU-BONIN ARC / BACK ARC KNOLLS / DREDGE MWD67 / PACIFIC OCEAN	VOLCANIC ROCK	BASALT	14	Back Arc	WHOLE ROCK	0.93	5573.94	51.7	371.5	17.5	26.2	0.62	3.72	9.36	8.08	2.38	0.82	2.7	2.8	1.66	1.49	0.22	0.78	0.349
2010	[14052] TOLLSTRUP D. L.(2010) [GeoReM [5550] ]	samp. 72-3	IZU-BONIN ARC / BACK ARC KNOLLS / DREDGE MWD72 / PACIFIC OCEAN	VOLCANIC ROCK	BASALT	14	Back Arc	WHOLE ROCK	0.81	4854.73	44.8	332.9	20.7	45.5	1.44	7.51	17.55	13.5	3.47	1.11	3.57	3.34	1.96	1.8	0.27	1.2	0.883
2010	[14052] TOLLSTRUP D. L.(2010) [GeoReM [5550] ]	samp. 72-5	IZU-BONIN ARC / BACK ARC KNOLLS / DREDGE MWD72 / PACIFIC OCEAN	VOLCANIC ROCK	BASALT	14	Back Arc	WHOLE ROCK	0.82	4914.66	53.3	334.8	20.6	45.8	1.75	7.61	17.8	13.56	3.48	1.11	3.62	3.29	1.9	1.76	0.27	1.21	0.913
2010	[14052] TOLLSTRUP D. L.(2010) [GeoReM [5550] ]	samp. D366	IZU-BONIN ARC / BACK ARC KNOLLS / PACIFIC OCEAN	VOLCANIC ROCK	BASALT	14	Back Arc	WHOLE ROCK	0.94	5633.88	46	294.1	18.1	46	1.86	3.86	9.12	7.3	2.19	0.75	2.59	2.92	1.73	1.59	0.23	1.15	0.298
2010	[14052] TOLLSTRUP D. L.(2010) [GeoReM [5550] ]	samp. 32-1	IZU-BONIN ARC / BACK ARC KNOLLS / DREDGE MWD32 / PACIFIC OCEAN	VOLCANIC ROCK	BASALT	14	Back Arc	WHOLE ROCK					18	27.5	0.34	2.56	6.39	5.83	1.88	0.68	2.28	2.57	1.75	1.66	0.26	0.9	0.267
Download from GEOROC - Geochemical Database
Date of Query: Monday
Please note: There is a List of your Query Criteria at the End of this Sheet.
Complete references (see 'CITATION' column above) - note that serial numbers [#####] correspond to record numbers from the GEOROC database
[10515] ISHIZUKA O., TAYLOR R. N., YUASA M., MILTON J. A., NESBITT R. W., UTO K., SAKAMOTO I. ; PROCESSES CONTROLLING ALONG-ARC ISOTOPIC VARIATION OF THE SOUTHERN IZU-BONIN ARC ; GEOCHEMISTRY GEOPHYSICS GEOSYSTEMS 8 [2007]
[10790] TAMURA Y., TANI K., CHANG QING, SHUKUNO H., KAWABATA H., ISHIZUKA O., FISKE R. S. ; WET AND DRY BASALT MAGMA EVOLUTION AT TORISHIMA VOLCANO, IZU-BONIN ARC, JAPAN: THE POSSIBLE ROLE OF PHENGITE IN THE DOWNGOING SLAB ; J. PETROL. 48 [2007] 1999-2031
[10884] ISHIZUKA O., TAYLOR R. N., MILTON J. A., NESBITT R. W., YUASA M., SAKAMOTO I. ; VARIATION IN THE MANTLE SOURCES OF THE NORTHERN IZU ARC WITH TIME AND SPACE - CONSTRAINTS FROM HIGH-PRECISION PB ISOTOPES ; J. VOLCANOL. GEOTHERM. RES. 156 [2006] 266-290
[12151] ISHIZUKA O., GESHI N., ITO J., KAWANABE Y., TUZINO T. ; THE MAGMATIC PLUMBING OF THE SUBMARINE HACHIJO NW VOLCANIC CHAIN, HACHIJOJIMA, JAPAN: LONG-DISTANCE MAGMA TRANSPORT? ; J. GEOPHYS. RES. B113 [2008]
[14052] TOLLSTRUP D. L., GILL J. B., KENT A. J. R., PRINKEY D., WILLIAMS ROSS W., TAMURA Y., ISHIZUKA O. ; ACROSS-ARC GEOCHEMICAL TRENDS IN THE IZU-BONIN ARC: CONTRIBUTIONS FROM THE SUBDUCTING SLAB, REVISITED ; GEOCHEMISTRY GEOPHYSICS GEOSYSTEMS 11 [2010]
[14066] ISHIZUKA O., TAYLOR R. N., MILTON J. A., NESBITT R. W. ; FLUID-MANTLE INTERACTION IN AN INTRA-OCEANIC ARC: CONSTRAINTS FROM HIGH-PRECISION PB ISOTOPES ; EARTH PLANET. SCI. LETT. 211 [2003] 221-236
[15499] ISHIZUKA O., TANI K., REAGAN M. K., KANAYAMA K., UMINO S., HARIGANE Y., SAKAMOTO I., MIYAJIMA Y., YUASA M., DUNKLEY D. J. ; THE TIMESCALES OF SUBDUCTION INITIATION AND SUBSEQUENT EVOLUTION OF AN OCEANIC ISLAND ARC ; EARTH PLANET. SCI. LETT. 306 [2011] 229-240
[15968] KIMURA J.-I., KENT A. J. R., ROWE M. C., KATAKUSE M., NAKANO F., LE GRANGE M., VAN KEKEN P. E., KAWABATA H., STERN R. J. ; ORIGIN OF CROSS-CHAIN GEOCHEMICAL VARIATION IN QUATERNARY LAVAS FROM THE NORTHERN IZU ARC: USING A QUANTITATIVE MASS BALANCE APPROACH TO IDENTIFY MANTLE SOURCES AND MANTLE WEDGE PROCESSES ; GEOCHEMISTRY GEOPHYSICS GEOSYSTEMS 11 [2010]
[19795] ISHIZUKA O., TAYLOR R. N., GESHI N., OIKAWA T., KAWANABE Y., OGITSU I. ; PROGRESSIVE MIXED-MAGMA RECHARGING OF IZU-OSHIMA VOLCANO, JAPAN: A GUIDE TO MAGMA CHAMBER VOLUME ; EARTH PLANET. SCI. LETT. 430 [2015] 19-29
[20107] ISHIZUKA O., GESHI N., KAWANABE Y., OGITSU I., TAYLOR R. N., TUZINO T., SAKAMOTO I., ARAI K., NAKANO S. ; LONG-DISTANCE MAGMA TRANSPORT FROM ARC VOLCANOES INFERRED FROM THE SUBMARINE ERUPTIVE FISSURES OFFSHORE IZU-OSHIMA VOLCANO, IZU-BONIN ARC ; J. VOLCANOL. GEOTHERM. RES. 285 [2014] 1-17
[20417] FREYMUTH H., IVKO B., GILL J. B., TAMURA Y., ELLIOTT T. R. ; THORIUM ISOTOPE EVIDENCE FOR MELTING OF THE MAFIC OCEANIC CRUST BENEATH THE IZU ARC ; GEOCHIM. COSMOCHIM. ACTA 186 [2016] 49-70
[2328] TAYLOR R. N., NESBITT R. W. ; ISOTOPIC CHARACTERISTICS OF SUBDUCTION FLUIDS IN AN INTRA-OCEANIC SETTING, IZU-BONIN ARC, JAPAN ; EARTH PLANET. SCI. LETT. 164 [1998] 79-98
[4658] PEATE D. W., SIEMS D. F. ; CAUSES OF SPATIAL COMPOSITIONAL VARIATIONS IN MARIANA ARC LAVAS: TRACE ELEMENT EVIDENCE ; THE ISLAND ARC 7 [1998] 479-495
[6564] YOKOYAMA TETSUYA, KOBAYASHI K., KURITANI T., NAKAMURA E. ; MANTLE METASOMATISM AND RAPID ASCENT OF SLAB COMPONENTS BENEATH ISLAND ARCS: EVIDENCE FROM 238U-230TH-226RA DISEQUILIBRIA OF MIYAKEJIMA VOLCANO, IZU ARC, JAPAN ; J. GEOPHYS. RES. B108 [2003]
[8488] TAMURA Y., TANI K., ISHIZUKA O., CHANG QING, SHUKUNO H., FISKE R. S. ; ARE ARC BASALTS DRY, WET, OR BOTH? EVIDENCE FROM THE SUMISU CALDERA VOLCANO, IZU-BONIN ARC, JAPAN ; J. PETROL. 46 [2005] 1769-1803
[8556] SUN C.-H., STERN R. J. ; GENESIS OF MARIANA SHOSHONITES: CONTRIBUTION OF THE SUBDUCTION COMPONENT ; J. GEOPHYS. RES. B106 [2001] 589-608
[9270] YOKOYAMA TETSUYA, KURITANI T., KOBAYASHI K., NAKAMURA E. ; GEOCHEMICAL EVOLUTION OF A SHALLOW MAGMA PLUMBING SYSTEM DURING THE LAST 500 YEARS, MIYAKEJIMA VOLCANO, JAPAN: CONSTRAINTS FROM 238U-230TH-226RA SYSTEMATICS ; GEOCHIM. COSMOCHIM. ACTA 70 [2006] 2885-2901
[9590] SHUKUNO H., TAMURA Y., TANI K., CHANG QING, SUZUKI T., FISKE R. S. ; ORIGIN OF SILICIC MAGMAS AND THE COMPOSITIONAL GAP AT SUMISU SUBMARINE CALDERA, IZU-BONIN ARC, JAPAN ; J. VOLCANOL. GEOTHERM. RES. 156 [2006] 187-216

## Sheet: Mariana
Year	CITATION	SAMPLE NAME	UNIQUE_ID	LOCATION	ROCK TYPE	ROCK NAME	kcode	setting	TYPE OF MATERIAL	TiO2	Ti	Sc	V	Y	Zr	Nb	La	Ce	Nd	Sm	Eu	Gd	Dy	Er	Yb	LU	Hf	Th	LATITUDE (MIN.)	LONGITUDE (MIN.)	LATITUDE (MAX.)	LONGITUDE (MAX.)
2005	[8514] PEARCE J. A.(2005) [GeoReM [496] ]	samp. J42-5		MARIANA ARC / MARIANA TROUGH / PACIFIC OCEAN	VOLCANIC ROCK	ANDESITE	2	trough	VOLCANIC GLASS			26.7	115	64.5	223.2	6.06	10.42	28.03	21.07	7.13	2.37	8.42	9.98	6.29	6.2	0.99	5.51	0.691	12.95	143.61	12.95	143.61
1997	[2375] STRAUB S. M. (1997)	samp. 3622	9693-3622	MARIANA ARC / MARIANA TROUGH / DREDGE 36 KG / PACIFIC OCEAN	VOLCANIC ROCK	ANDESITE, BASALTIC	3	trough	VOLCANIC GLASS	1.2	7192.19	29		33	117	2.8	12.43	27.58	19.32	5.46	1.59	5.84	6.31	3.83	3.85	0.55	3.2	1.5	18.1763	144.691	18.1763	144.691
1997	[2375] STRAUB S. M. (1997)	samp. 5888	9695-5888	MARIANA ARC / MARIANA TROUGH / DREDGE 58 KL / PACIFIC OCEAN	VOLCANIC ROCK	ANDESITE, BASALTIC	3	trough	VOLCANIC GLASS	1.2	7192.19	28		33	120	2.4	12.27	27.22	19.62	5.56	1.61	5.99	6.36	3.86	3.76	0.56	3.41	1.5	17.9357	144.839	17.9357	144.839
1997	[2375] STRAUB S. M. (1997)	samp. 5894	9695-5894	MARIANA ARC / MARIANA TROUGH / DREDGE 58 KL / PACIFIC OCEAN	VOLCANIC ROCK	ANDESITE, BASALTIC	3	trough	VOLCANIC GLASS	1.2	7192.19	29		33	112	3.4	12	26.24	18.18	5.22	1.53	5.64	6.04	3.65	3.68	0.54	3.28	1.4	17.9357	144.839	17.9357	144.839
1995	[3178] STRAUB S. M. (1995)	samp. 3622	9693-3622	MARIANA ARC / MARIANA TROUGH / DREDGE 36 KG / PACIFIC OCEAN	VOLCANIC ROCK	ANDESITE, BASALTIC	3	trough	VOLCANIC GLASS	1.2	7192.19	29		33	117	2.8	12.43	27.58	19.32	5.46	1.59	5.84	6.31	3.83	3.85	0.55	3.2	1.5	18.1763	144.691	18.1763	144.691
1995	[3178] STRAUB S. M. (1995)	samp. 5888	9695-5888	MARIANA ARC / MARIANA TROUGH / DREDGE 58 KL / PACIFIC OCEAN	VOLCANIC ROCK	ANDESITE, BASALTIC	3	trough	VOLCANIC GLASS	1.2	7192.19	28		33	120	2.4	12.27	27.22	19.62	5.56	1.61	5.99	6.36	3.86	3.76	0.56	3.4	1.5	17.9357	144.839	17.9357	144.839
1995	[3178] STRAUB S. M. (1995)	samp. 5894	9695-5894	MARIANA ARC / MARIANA TROUGH / DREDGE 58 KL / PACIFIC OCEAN	VOLCANIC ROCK	ANDESITE, BASALTIC	3	trough	VOLCANIC GLASS	1.2	7192.19	29		33	112	3.4	12	26.24	18.18	5.22	1.53	5.64	6.04	3.65	3.68	0.54	3.3	1.4	17.9357	144.839	17.9357	144.839
2005	[8514] PEARCE J. A.(2005) [GeoReM [496] ]	samp. 57:1-4	9717-57:1-4	MARIANA ARC / MARIANA TROUGH / DREDGE 57 / PACIFIC OCEAN	VOLCANIC ROCK	ANDESITE, BASALTIC	3	trough	VOLCANIC GLASS			39.3	318	18.9	75.8	5.66	16.64	33.12	17.12	3.76	1.24	3.63	3.02	1.79	1.69	0.27	1.75	1.768	23.16	142.3	23.16	142.3
2005	[8514] PEARCE J. A.(2005) [GeoReM [496] ]	samp. 7-GL-1		MARIANA ARC / MARIANA TROUGH / PACIFIC OCEAN	VOLCANIC ROCK	ANDESITE, BASALTIC	3	trough	VOLCANIC GLASS			28.8	353	39.5	118.2	2.46	4.91	13.83	12.31	4.03	1.39	5.05	6.24	3.88	3.96	0.63	3.08	0.325	13.33	143.75	13.33	143.75
2005	[8514] PEARCE J. A.(2005) [GeoReM [496] ]	samp. 7-GL-4		MARIANA ARC / MARIANA TROUGH / PACIFIC OCEAN	VOLCANIC ROCK	ANDESITE, BASALTIC	3	trough	VOLCANIC GLASS			35.6	252	31.7	105.2	1.67	3.71	11.64	10.73	3.47	1.26	4.3	5.06	3.09	3.04	0.47	2.58	0.165	13.85	143.9	13.85	143.9
2005	[8514] PEARCE J. A.(2005) [GeoReM [496] ]	samp. 7-GL-5		MARIANA ARC / MARIANA TROUGH / PACIFIC OCEAN	VOLCANIC ROCK	ANDESITE, BASALTIC	3	trough	VOLCANIC GLASS			35.9	242	29.6	94.3	1.86	3.51	10.44	9.73	3.12	1.17	4.04	4.79	2.95	2.87	0.44	2.38	0.165	14.08	143.95	14.08	143.95
2005	[8514] PEARCE J. A.(2005) [GeoReM [496] ]	samp. COOK 6-5-1		MARIANA ARC / MARIANA TROUGH / PACIFIC OCEAN	VOLCANIC ROCK	ANDESITE, BASALTIC	3	trough	VOLCANIC GLASS			33.1	342	25.2	111.5	3.74	24.94	49.55	24.18	5.57	1.7	4.92	4.2	2.4	2.32	0.37	2.83	2.932	12.43	142.03	12.43	142.03
2005	[8514] PEARCE J. A.(2005) [GeoReM [496] ]	samp. COOK 6-5-4		MARIANA ARC / MARIANA TROUGH / PACIFIC OCEAN	VOLCANIC ROCK	ANDESITE, BASALTIC	3	trough	VOLCANIC GLASS			34.1	355	25.9	114.1	3.89	26.17	51.8	25.22	5.79	1.78	5.16	4.35	2.5	2.4	0.39	2.94	3.067	12.43	142.03	12.43	142.03
2005	[8514] PEARCE J. A.(2005) [GeoReM [496] ]	samp. COOK 6-5-6		MARIANA ARC / MARIANA TROUGH / PACIFIC OCEAN	VOLCANIC ROCK	ANDESITE, BASALTIC	3	trough	VOLCANIC GLASS			37	387	28.1	124.4	4.17	28.08	55.81	27.2	6.23	1.91	5.56	4.69	2.68	2.6	0.41	3.15	3.284	12.43	142.03	12.43	142.03
2005	[8514] PEARCE J. A.(2005) [GeoReM [496] ]	samp. COOK 6-6-2		MARIANA ARC / MARIANA TROUGH / PACIFIC OCEAN	VOLCANIC ROCK	ANDESITE, BASALTIC	3	trough	VOLCANIC GLASS			37.4	331	28.2	121.6	3.83	15.44	33.27	18.59	4.88	1.6	4.8	4.6	2.72	2.64	0.41	3.02	1.49	12.44	142.27	12.44	142.27
2005	[8514] PEARCE J. A.(2005) [GeoReM [496] ]	samp. COOK 6-6-3		MARIANA ARC / MARIANA TROUGH / PACIFIC OCEAN	VOLCANIC ROCK	ANDESITE, BASALTIC	3	trough	VOLCANIC GLASS			29.6	304	28	131.2	4.32	16.99	35.8	19.34	4.94	1.59	4.8	4.6	2.73	2.68	0.43	3.26	1.82	12.44	142.27	12.44	142.27
2005	[8514] PEARCE J. A.(2005) [GeoReM [496] ]	samp. COOK 6-6-4		MARIANA ARC / MARIANA TROUGH / PACIFIC OCEAN	VOLCANIC ROCK	ANDESITE, BASALTIC	3	trough	VOLCANIC GLASS			37	309	25.9	111.4	3.51	14.19	30.72	17.15	4.51	1.49	4.46	4.27	2.53	2.45	0.39	2.81	1.376	12.44	142.27	12.44	142.27
2005	[8514] PEARCE J. A.(2005) [GeoReM [496] ]	samp. COOK 6-6-5		MARIANA ARC / MARIANA TROUGH / PACIFIC OCEAN	VOLCANIC ROCK	ANDESITE, BASALTIC	3	trough	VOLCANIC GLASS			27.2	286	27.8	135	4.45	16.75	35.61	18.91	4.78	1.53	4.7	4.5	2.72	2.66	0.42	3.3	1.834	12.44	142.27	12.44	142.27
2005	[8514] PEARCE J. A.(2005) [GeoReM [496] ]	samp. COOK 6-6-7		MARIANA ARC / MARIANA TROUGH / PACIFIC OCEAN	VOLCANIC ROCK	ANDESITE, BASALTIC	3	trough	VOLCANIC GLASS			30.3	274	23.4	100.6	3.19	13.02	28.1	15.65	4.09	1.34	4.03	3.88	2.28	2.22	0.35	2.53	1.256	12.44	142.27	12.44	142.27
2005	[8514] PEARCE J. A.(2005) [GeoReM [496] ]	samp. J42-1		MARIANA ARC / MARIANA TROUGH / PACIFIC OCEAN	VOLCANIC ROCK	ANDESITE, BASALTIC	3	trough	VOLCANIC GLASS			42.8	369	72.1	230.8	6.35	10.45	28.43	21.93	7.58	2.52	9.08	10.96	6.92	6.86	1.09	6.05	0.712	12.93	143.62	12.93	143.62
2005	[8514] PEARCE J. A.(2005) [GeoReM [496] ]	samp. J42-10		MARIANA ARC / MARIANA TROUGH / PACIFIC OCEAN	VOLCANIC ROCK	ANDESITE, BASALTIC	3	trough	VOLCANIC GLASS			37.2	357	46.9	151.3	4.31	7.05	19	14.19	4.97	1.69	6.04	7.44	4.71	4.71	0.75	3.94	0.481	12.96	143.62	12.96	143.62
2005	[8514] PEARCE J. A.(2005) [GeoReM [496] ]	samp. J42-11		MARIANA ARC / MARIANA TROUGH / PACIFIC OCEAN	VOLCANIC ROCK	ANDESITE, BASALTIC	3	trough	VOLCANIC GLASS			35.3	340	50.9	169.4	4.64	7.16	20.15	15.49	5.46	1.85	6.63	8.07	5.11	5.05	0.8	4.32	0.451	12.95	143.62	12.95	143.62
2005	[8514] PEARCE J. A.(2005) [GeoReM [496] ]	samp. J42-3		MARIANA ARC / MARIANA TROUGH / PACIFIC OCEAN	VOLCANIC ROCK	ANDESITE, BASALTIC	3	trough	VOLCANIC GLASS			34.1	377	43.3	138.9	3.84	5.93	16.54	13.1	4.66	1.6	5.71	6.98	4.41	4.4	0.69	3.66	0.376	12.95	143.62	12.95	143.62
2005	[8514] PEARCE J. A.(2005) [GeoReM [496] ]	samp. J42-4		MARIANA ARC / MARIANA TROUGH / PACIFIC OCEAN	VOLCANIC ROCK	ANDESITE, BASALTIC	3	trough	VOLCANIC GLASS			38	413	53.6	178.2	4.67	7.97	21.79	16.76	5.8	1.96	7.04	8.53	5.4	5.33	0.85	4.6	0.54	12.95	143.62	12.95	143.62
2005	[8514] PEARCE J. A.(2005) [GeoReM [496] ]	samp. J42-9		MARIANA ARC / MARIANA TROUGH / PACIFIC OCEAN	VOLCANIC ROCK	ANDESITE, BASALTIC	3	trough	VOLCANIC GLASS			36.8	417	51.8	174.8	4.51	7.72	21.35	16.18	5.69	1.89	6.76	8.24	5.14	5.14	0.81	4.44	0.516	12.96	143.62	12.96	143.62
2005	[8514] PEARCE J. A.(2005) [GeoReM [496] ]	samp. T7-46:1-8	9731-46:1-8	MARIANA ARC / MARIANA TROUGH / DREDGE 46 / PACIFIC OCEAN	VOLCANIC ROCK	ANDESITE, BASALTIC	3	trough	VOLCANIC GLASS			37.6	261	28.7	81.8	2.65	4.38	11.4	9.21	3.1	1.13	4.02	4.55	2.86	2.67	0.42	2.12	0.353	20.82	143.55	20.82	143.55
2005	[8514] PEARCE J. A.(2005) [GeoReM [496] ]	samp. T7-51:1-1	9724-51:1-1	MARIANA ARC / MARIANA TROUGH / DREDGE 51 / PACIFIC OCEAN	VOLCANIC ROCK	ANDESITE, BASALTIC	3	trough	VOLCANIC GLASS			33.5	260	25.6	71.9	1.72	4.6	11.58	9.5	3.06	1.13	3.75	4.19	2.54	2.5	0.39	1.97	0.513	22.49	142.67	22.49	142.67
2005	[8514] PEARCE J. A.(2005) [GeoReM [496] ]	samp. T7-66:3-4	9727-66:3-4	MARIANA ARC / MARIANA TROUGH / DREDGE 66 / PACIFIC OCEAN	VOLCANIC ROCK	ANDESITE, BASALTIC	3	trough	VOLCANIC GLASS			38.3	321	24.5	59.6	0.99	3.13	8.34	7.15	2.39	0.95	3.3	3.87	2.4	2.43	0.38	1.64	0.29	22.12	143.04	22.12	143.04
2005	[8514] PEARCE J. A.(2005) [GeoReM [496] ]	samp. T7-68:1-2	9728-68:1-2	MARIANA ARC / MARIANA TROUGH / DREDGE 68 / PACIFIC OCEAN	VOLCANIC ROCK	ANDESITE, BASALTIC	3	trough	VOLCANIC GLASS			35.2	231	22.4	85.5	3.68	9.21	19.72	11.96	3.15	1.14	3.64	3.65	2.18	2.07	0.32	1.96	1.051	21.35	143.28	21.35	143.28
2005	[8514] PEARCE J. A.(2005) [GeoReM [496] ]	samp. T7-75:1-2	9738-75:1-2	MARIANA ARC / MARIANA TROUGH / DREDGE 75 / PACIFIC OCEAN	VOLCANIC ROCK	ANDESITE, BASALTIC	3	trough	VOLCANIC GLASS			35.9	260	32.9	128.5	7.72	7.15	18.01	12.73	3.91	1.34	4.9	5.35	3.22	3.09	0.48	2.99	0.552	19.44	144.48	19.44	144.48
2005	[8514] PEARCE J. A.(2005) [GeoReM [496] ]	samp. T7-76:1-1	9737-76:1-1	MARIANA ARC / MARIANA TROUGH / DREDGE 76 / PACIFIC OCEAN	VOLCANIC ROCK	ANDESITE, BASALTIC	3	trough	VOLCANIC GLASS			32.9	273	37.8	123.4	4.5	5.36	15.26	12.42	4.13	1.46	5.42	6.09	3.71	3.6	0.54	3.03	0.354	19.45	144.54	19.45	144.54
2014	[19118] BROUNCE M. (2014)	samp. TN273-13D-01-01		MARIANA ARC / MARIANA TROUGH / PACIFIC OCEAN	VOLCANIC ROCK	BASALT	4	trough	VOLCANIC GLASS	0.9	5394.14	30.804	295.987	17.766	73.305	1.648	4.715	13.829	7.365	2.145	0.782	2.525	2.799	1.641	1.518	0.231	1.515	0.461	13.505	143.18	13.505	143.18
2014	[19118] BROUNCE M. (2014)	samp. TN273-06D-01-03		MARIANA ARC / MARIANA TROUGH / PACIFIC OCEAN	VOLCANIC ROCK	BASALT	4	trough	VOLCANIC GLASS	1.35	8091.21	23.352	177.509	56.717	239.679	6.56	10.529	29.339	23.072	7.096	2.1	9.272	10.313	6.652	6.515	0.982	6.128	0.844	13.769	143.488	13.769	143.488
1990	[2430] HAWKINS J. W. JR. (1990)	samp. ALV1839-14		MARIANA ARC / MARIANA TROUGH / DIVE 1839 / PACIFIC OCEAN	VOLCANIC ROCK	BASALT	4	trough	VOLCANIC GLASS	1.39	8330.95		225	28	101	1	4.95	13.6	11	3.5	1.26				2.72	0.413		0.27	18.2	144.7	18.2	144.7
2014	[19118] BROUNCE M. (2014)	samp. TN273-04D-01-02		MARIANA ARC / MARIANA TROUGH / PACIFIC OCEAN	VOLCANIC ROCK	BASALT	4	trough	VOLCANIC GLASS	1.5	8990.23	26.637	248.116	30.013	104.864	2.757	4.602	11.821	10.289	3.326	1.217	4.72	5.442	3.533	3.545	0.549	2.881	0.365	13.895	143.569	13.895	143.569
2014	[19118] BROUNCE M. (2014)	samp. TN273-07D-01-01		MARIANA ARC / MARIANA TROUGH / PACIFIC OCEAN	VOLCANIC ROCK	BASALT	4	trough	VOLCANIC GLASS	1.51	9050.17	27.753	332.125	38.452	142.63	3.634	5.864	15.656	14.188	4.578	1.607	6.163	6.766	4.186	4.123	0.609	3.503	0.422	13.73	143.437	13.73	143.437
2014	[19118] BROUNCE M. (2014)	samp. TN273-02D-01-02		MARIANA ARC / MARIANA TROUGH / PACIFIC OCEAN	VOLCANIC ROCK	BASALT	4	trough	VOLCANIC GLASS	1.53	9170.04	24.759	221.055	35.642	119.058	3.914	5.506	16.284	13.005	4.363	1.496	5.446	6.211	3.734	3.837	0.573	2.937	0.388	13.945	143.596	13.945	143.596
2014	[19118] BROUNCE M. (2014)	samp. TN273-05D-01-01		MARIANA ARC / MARIANA TROUGH / PACIFIC OCEAN	VOLCANIC ROCK	BASALT	4	trough	VOLCANIC GLASS	1.56	9349.84	23.556	154.271	45.293	155.306	4.968	6.882	19.314	16.246	5.164	1.776	6.985	7.68	4.808	4.67	0.707	3.819	0.511	13.85	143.52	13.85	143.52
2014	[19118] BROUNCE M. (2014)	samp. TN273-09D-01-03		MARIANA ARC / MARIANA TROUGH / PACIFIC OCEAN	VOLCANIC ROCK	BASALT	4	trough	VOLCANIC GLASS	1.64	9829.32	28.66	300.688	29.652	110.92	3.256	5.617	15.698	12.358	3.893	1.413	5.015	5.459	3.465	3.312	0.506	2.823	0.451	13.66	143.355	13.66	143.355
2014	[19118] BROUNCE M. (2014)	samp. TN273-01D-01-01		MARIANA ARC / MARIANA TROUGH / PACIFIC OCEAN	VOLCANIC ROCK	BASALT	4	trough	VOLCANIC GLASS	1.65	9889.26	24.241	192.277	42.052	170.969	5.128	7.731	22.491	14.032	4.204	1.442	5.643	6.12	3.76	3.452	0.561	3.178	0.449	13.996	143.624	13.996	143.624
2014	[19118] BROUNCE M. (2014)	samp. TN273-12D-01-01		MARIANA ARC / MARIANA TROUGH / PACIFIC OCEAN	VOLCANIC ROCK	BASALT	4	trough	VOLCANIC GLASS	1.67	10009.1	28.332	296.596	30.264	108.433	2.895	5.188	14.343	12.203	3.943	1.436	4.838	5.453	3.213	3.331	0.477	2.759	0.452	13.607	143.219	13.607	143.219
2014	[19118] BROUNCE M. (2014)	samp. TN273-08D-01-01		MARIANA ARC / MARIANA TROUGH / PACIFIC OCEAN	VOLCANIC ROCK	BASALT	4	trough	VOLCANIC GLASS	1.69	10129	23.979	168.03	38.694	139.884	3.566	6.214	17.236	14.023	4.641	1.451	6.213	6.399	4.536	4.253	0.55	3.589	0.588	13.688	143.384	13.688	143.384
2014	[19118] BROUNCE M. (2014)	samp. TN273-06D-02-02		MARIANA ARC / MARIANA TROUGH / PACIFIC OCEAN	VOLCANIC ROCK	BASALT	4	trough	VOLCANIC GLASS	1.72	10308.8	29.353	415.973	31.956	100.725	3.331	4.353	12.203	10.97	3.835	1.329	4.949	5.82	3.722	3.686	0.581	2.644	0.327	13.769	143.488	13.769	143.488
2014	[19118] BROUNCE M. (2014)	samp. TN273-06D-03-03		MARIANA ARC / MARIANA TROUGH / PACIFIC OCEAN	VOLCANIC ROCK	BASALT	4	trough	VOLCANIC GLASS	1.79	10728.3	30.633	412.674	30.417	95.391	3.03	4.493	12.684	10.604	3.75	1.312	4.551	5.579	3.495	3.492	0.525	2.466	0.347	13.769	143.488	13.769	143.488
2005	[8514] PEARCE J. A.(2005) [GeoReM [496] ]	samp. 4T7-7:1-5	9730-47:1-5	MARIANA ARC / MARIANA TROUGH / DREDGE 47 / PACIFIC OCEAN	VOLCANIC ROCK	BASALT	4	trough	VOLCANIC GLASS			37.1	252	24.3	64.2	2.19	4.58	11.04	8.49	2.73	1	3.51	3.82	2.34	2.25	0.35	1.73	0.492	20.97	143.44	20.97	143.44
2005	[8514] PEARCE J. A.(2005) [GeoReM [496] ]	samp. 56:2-5	9719-56:2-5	MARIANA ARC / MARIANA TROUGH / DREDGE 56 / PACIFIC OCEAN	VOLCANIC ROCK	BASALT	4	trough	VOLCANIC GLASS			46	512	26.8	66.2	1.96	10.01	19.4	12.41	3.31	1.13	3.77	4.23	2.62	2.61	0.42	1.91	1.896	23	142.17	23	142.17
2005	[8514] PEARCE J. A.(2005) [GeoReM [496] ]	samp. 7D3-4		MARIANA ARC / MARIANA TROUGH / PACIFIC OCEAN	VOLCANIC ROCK	BASALT	4	trough	VOLCANIC GLASS			35.4	292	42.9	168.1	4.68	6.22	17.69	15.04	4.69	1.61	5.77	6.73	4.09	4.01	0.61	4.21	0.335	14.58	144.1	14.58	144.1
2005	[8514] PEARCE J. A.(2005) [GeoReM [496] ]	samp. 7D3-5		MARIANA ARC / MARIANA TROUGH / PACIFIC OCEAN	VOLCANIC ROCK	BASALT	4	trough	VOLCANIC GLASS			35	288	41.1	159.6	4.56	6.07	17.55	15.06	4.64	1.61	5.75	6.75	4.09	4	0.62	3.83	0.313	14.58	144.1	14.58	144.1
2005	[8514] PEARCE J. A.(2005) [GeoReM [496] ]	samp. 7D3-7		MARIANA ARC / MARIANA TROUGH / PACIFIC OCEAN	VOLCANIC ROCK	BASALT	4	trough	VOLCANIC GLASS			35.5	295	42.9	159.5	4.65	6.24	17.95	15.58	4.86	1.64	5.92	6.96	4.23	4.14	0.64	3.81	0.319	14.58	144.1	14.58	144.1
2005	[8514] PEARCE J. A.(2005) [GeoReM [496] ]	samp. 7-GL-2		MARIANA ARC / MARIANA TROUGH / PACIFIC OCEAN	VOLCANIC ROCK	BASALT	4	trough	VOLCANIC GLASS			37.3	239	19.8	49.3	0.98	2.65	6.95	6.22	2.06	0.79	2.67	3.19	1.94	1.98	0.3	1.36	0.229	13.48	143.8	13.48	143.8
2005	[8514] PEARCE J. A.(2005) [GeoReM [496] ]	samp. 7-GL-3		MARIANA ARC / MARIANA TROUGH / PACIFIC OCEAN	VOLCANIC ROCK	BASALT	4	trough	VOLCANIC GLASS			35.7	297	37.1	117.5	1.95	4.11	12.81	11.88	3.88	1.39	4.99	5.92	3.64	3.59	0.55	2.92	0.188	13.64	143.87	13.64	143.87
2005	[8514] PEARCE J. A.(2005) [GeoReM [496] ]	samp. D1008		MARIANA ARC / MARIANA TROUGH / PACIFIC OCEAN	VOLCANIC ROCK	BASALT	4	trough	VOLCANIC GLASS			32.1	218	26.7	97.6	3.87	5.4	13.49	10.7	3.17	1.15	3.87	4.36	2.61	2.56	0.4	2.34	0.399	18.15	144.73	18.15	144.73
2005	[8514] PEARCE J. A.(2005) [GeoReM [496] ]	samp. D1009	10362-D1009	MARIANA ARC / MARIANA TROUGH / PACIFIC OCEAN	VOLCANIC ROCK	BASALT	4	trough	VOLCANIC GLASS			34.1	228	29.6	93.3	3.26	6.42	15.33	11.65	3.32	1.19	3.96	4.41	2.63	2.58	0.4	2.27	0.487	18.15	144.73	18.15	144.73
2005	[8514] PEARCE J. A.(2005) [GeoReM [496] ]	samp. D1010	10362-D1010	MARIANA ARC / MARIANA TROUGH / PACIFIC OCEAN	VOLCANIC ROCK	BASALT	4	trough	VOLCANIC GLASS			33.1	223	28.1	92.8	3.57	5.91	14.41	11.17	3.25	1.17	3.91	4.38	2.62	2.57	0.4	2.31	0.443	18.15	144.73	18.15	144.73
2005	[8514] PEARCE J. A.(2005) [GeoReM [496] ]	samp. D1011		MARIANA ARC / MARIANA TROUGH / PACIFIC OCEAN	VOLCANIC ROCK	BASALT	4	trough	VOLCANIC GLASS			37.1	235	26.3	87.9	3	5.04	12.74	10.28	3.09	1.14	3.75	4.29	2.61	2.53	0.39	2.16	0.38	18.15	144.73	18.15	144.73
2005	[8514] PEARCE J. A.(2005) [GeoReM [496] ]	samp. D68-1-6		MARIANA ARC / MARIANA TROUGH / PACIFIC OCEAN	VOLCANIC ROCK	BASALT	4	trough	VOLCANIC GLASS			38.4	261	30.9	95.5	1.87	3.41	10.99	10.25	3.36	1.26	4.26	4.99	3.03	2.96	0.46	2.43	0.133	14.17	143.97	14.17	143.97
2005	[8514] PEARCE J. A.(2005) [GeoReM [496] ]	samp. D68-2-1		MARIANA ARC / MARIANA TROUGH / PACIFIC OCEAN	VOLCANIC ROCK	BASALT	4	trough	VOLCANIC GLASS			37.1	249	28.8	93.36	1.8	3.09	9.97	9.35	3.07	1.19	3.93	4.62	2.8	2.74	0.43	2.354	0.13	14.17	143.97	14.17	143.97
2005	[8514] PEARCE J. A.(2005) [GeoReM [496] ]	samp. D68-2-4		MARIANA ARC / MARIANA TROUGH / PACIFIC OCEAN	VOLCANIC ROCK	BASALT	4	trough	VOLCANIC GLASS			37.6	252	30.2	93.54	1.89	3.26	10.43	9.72	3.2	1.2	4.03	4.77	2.89	2.84	0.44	2.356	0.151	14.17	143.97	14.17	143.97
2005	[8514] PEARCE J. A.(2005) [GeoReM [496] ]	samp. DS18-1-6	10323-DS18-1-6	MARIANA ARC / MARIANA TROUGH / DREDGE DS / PACIFIC OCEAN	VOLCANIC ROCK	BASALT	4	trough	VOLCANIC GLASS			35.4	244	23.2	56.1	2.38	3.94	9.44	7.51	2.45	0.9	3.11	3.82	2.33	2.2	0.34	1.57	0.415	16.18	144.79	16.18	144.79
2005	[8514] PEARCE J. A.(2005) [GeoReM [496] ]	samp. DS22-2-2	10324-DS22-2-2	MARIANA ARC / MARIANA TROUGH / DREDGE DS / PACIFIC OCEAN	VOLCANIC ROCK	BASALT	4	trough	VOLCANIC GLASS			32.2	171	25	98.2	4.38	4.71	11.84	8.4	2.57	1.06	3.3	3.97	2.43	2.39	0.37	2.26	0.236	16.96	144.78	16.96	144.78
2005	[8514] PEARCE J. A.(2005) [GeoReM [496] ]	samp. DS74-2-1	10325-DS74-2-1	MARIANA ARC / MARIANA TROUGH / DREDGE DS / PACIFIC OCEAN	VOLCANIC ROCK	BASALT	4	trough	VOLCANIC GLASS			32.2	229	21	57	2.51	4	9.5	7.24	2.22	0.86	2.83	3.32	2.01	2.03	0.32	1.43	0.45	16.53	144.83	16.53	144.83
2005	[8514] PEARCE J. A.(2005) [GeoReM [496] ]	samp. DS74-2-3	10325-DS74-2-3	MARIANA ARC / MARIANA TROUGH / DREDGE DS / PACIFIC OCEAN	VOLCANIC ROCK	BASALT	4	trough	VOLCANIC GLASS			34.2	242	22.5	65.8	2.41	4.86	12.04	9.23	2.83	1.02	3.28	3.63	2.18	2.12	0.32	1.7	0.399	16.53	144.83	16.53	144.83
2005	[8514] PEARCE J. A.(2005) [GeoReM [496] ]	samp. DS74-3-1	10325-DS74-3-1	MARIANA ARC / MARIANA TROUGH / DREDGE DS / PACIFIC OCEAN	VOLCANIC ROCK	BASALT	4	trough	VOLCANIC GLASS			30.8	264	27.1	88.6	4.87	5.04	12.87	9.88	3.1	1.08	3.84	4.42	2.67	2.6	0.4	2.25	0.481	16.53	144.83	16.53	144.83
2005	[8514] PEARCE J. A.(2005) [GeoReM [496] ]	samp. DS79-1-1		MARIANA ARC / MARIANA TROUGH / PACIFIC OCEAN	VOLCANIC ROCK	BASALT	4	trough	VOLCANIC GLASS			27.7	211	22.1	57.7	2.22	3.13	7.99	7.07	2.34	0.86	2.89	3.47	2.1	2.07	0.31	1.62	0.336	16.08	144.79	16.08	144.79
2005	[8514] PEARCE J. A.(2005) [GeoReM [496] ]	samp. DS79-2-2	10326-DS79-2-2	MARIANA ARC / MARIANA TROUGH / DREDGE DS / PACIFIC OCEAN	VOLCANIC ROCK	BASALT	4	trough	VOLCANIC GLASS			32.1	229	26.2	83.9	3.59	4.32	11.28	9.26	2.95	1.07	3.56	4.19	2.5	2.43	0.37	2.17	0.358	16.08	144.74	16.08	144.74
2005	[8514] PEARCE J. A.(2005) [GeoReM [496] ]	samp. DS80-23-2	10327-DS80-23-2	MARIANA ARC / MARIANA TROUGH / DREDGE DS / PACIFIC OCEAN	VOLCANIC ROCK	BASALT	4	trough	VOLCANIC GLASS			33	234	21.6	54.8	2.35	3.16	8.01	6.56	2.16	0.84	2.79	3.34	2.13	2.08	0.32	1.45	0.31	15.75	144.75	15.75	144.75
2005	[8514] PEARCE J. A.(2005) [GeoReM [496] ]	samp. DS80-25-3	10327-DS80-25-3	MARIANA ARC / MARIANA TROUGH / DREDGE DS / PACIFIC OCEAN	VOLCANIC ROCK	BASALT	4	trough	VOLCANIC GLASS			30.8	264	34.1	105.5	3.74	7.32	18.41	13.48	3.98	1.36	4.74	5.38	3.32	3.34	0.52	2.77	0.841	15.75	144.75	15.75	144.75
2005	[8514] PEARCE J. A.(2005) [GeoReM [496] ]	samp. DS84-1-1	10328-DS84-1-1	MARIANA ARC / MARIANA TROUGH / DREDGE DS / PACIFIC OCEAN	VOLCANIC ROCK	BASALT	4	trough	VOLCANIC GLASS			37.2	268	35.2	98.4	1.16	2.17	8.04	9.48	3.53	1.24	4.47	5.58	3.43	3.26	0.5	2.48	0.08	15	144.46	15	144.46
2005	[8514] PEARCE J. A.(2005) [GeoReM [496] ]	samp. DS84-2-1	10328-DS84-2-1	MARIANA ARC / MARIANA TROUGH / DREDGE DS / PACIFIC OCEAN	VOLCANIC ROCK	BASALT	4	trough	VOLCANIC GLASS			35.9	261	33.9	91.4	1.14	2.15	8.24	9.61	3.45	1.26	4.44	5.41	3.23	3.11	0.47	2.44	0.082	15	144.46	15	144.46
2005	[8514] PEARCE J. A.(2005) [GeoReM [496] ]	samp. DS86-4-1	10329-DS86-4-1	MARIANA ARC / MARIANA TROUGH / DREDGE DS / PACIFIC OCEAN	VOLCANIC ROCK	BASALT	4	trough	VOLCANIC GLASS			41.7	271	33.4	131.3	7.04	6.62	17.63	13.56	4.01	1.46	4.82	5.4	3.22	3.12	0.48	3.05	0.43	15.09	144.5	15.09	144.5
2005	[8514] PEARCE J. A.(2005) [GeoReM [496] ]	samp. DS86-6-1		MARIANA ARC / MARIANA TROUGH / DREDGE DS / PACIFIC OCEAN	VOLCANIC ROCK	BASALT	4	trough	VOLCANIC GLASS			37.5	281	36.8	129.5	5.77	5.83	16.08	12.91	4.13	1.43	4.89	5.87	3.45	3.41	0.51	3.17	0.362	15.09	144.5	15.09	144.5
2005	[8514] PEARCE J. A.(2005) [GeoReM [496] ]	samp. DS88-1-2	10330-DS88-1-2	MARIANA ARC / MARIANA TROUGH / DREDGE DS / PACIFIC OCEAN	VOLCANIC ROCK	BASALT	4	trough	VOLCANIC GLASS			33.3	269	37	133.6	6.12	6.36	16.61	12.97	4.17	1.38	5.01	5.73	3.54	3.43	0.54	3.07	0.474	15.3	144.51	15.3	144.51
2005	[8514] PEARCE J. A.(2005) [GeoReM [496] ]	samp. DS88-2-1	10330-DS88-2-1	MARIANA ARC / MARIANA TROUGH / DREDGE DS / PACIFIC OCEAN	VOLCANIC ROCK	BASALT	4	trough	VOLCANIC GLASS			36.6	251	32.2	113.5	5.09	5.59	15.02	11.78	3.6	1.31	4.42	5.11	3.1	3.05	0.48	2.72	0.41	15.3	144.51	15.3	144.51
2005	[8514] PEARCE J. A.(2005) [GeoReM [496] ]	samp. DS88-3-1	10330-DS88-3-1	MARIANA ARC / MARIANA TROUGH / DREDGE DS / PACIFIC OCEAN	VOLCANIC ROCK	BASALT	4	trough	VOLCANIC GLASS			33.5	228	28.5	98.8	4.47	5.01	13.38	10.52	3.2	1.18	3.94	4.55	2.76	2.73	0.43	2.43	0.368	15.3	144.51	15.3	144.51
2005	[8514] PEARCE J. A.(2005) [GeoReM [496] ]	samp. GTVA 71-1-7	10331-GTVA 71-1-7	MARIANA ARC / MARIANA TROUGH / DREDGE GTVA / PACIFIC OCEAN	VOLCANIC ROCK	BASALT	4	trough	VOLCANIC GLASS			38.5	219	19.7	62.5	3.56	3.68	9.33	7.48	2.36	0.9	2.7	3.21	1.93	1.86	0.28	1.57	0.306	16.99	144.83	16.99	144.83
2005	[8514] PEARCE J. A.(2005) [GeoReM [496] ]	samp. GTVA 75-1-1	10333-GTVA 75-1-1	MARIANA ARC / MARIANA TROUGH / DREDGE GTVA / PACIFIC OCEAN	VOLCANIC ROCK	BASALT	4	trough	VOLCANIC GLASS			33.9	264	24.4	74.8	3.3	6.48	14.64	10.6	3.11	1.08	3.6	4.01	2.38	2.29	0.37	1.83	0.778	16.41	144.85	16.41	144.85
2005	[8514] PEARCE J. A.(2005) [GeoReM [496] ]	samp. T7-46:1-6	9731-46:1-6	MARIANA ARC / MARIANA TROUGH / DREDGE 46 / PACIFIC OCEAN	VOLCANIC ROCK	BASALT	4	trough	VOLCANIC GLASS			36	256	27.7	79.1	2.62	4.08	10.77	8.73	2.86	1.08	3.87	4.33	2.66	2.53	0.39	2.04	0.331	20.82	143.55	20.82	143.55
2005	[8514] PEARCE J. A.(2005) [GeoReM [496] ]	samp. T7-48:1-3	9729-48:1-3	MARIANA ARC / MARIANA TROUGH / DREDGE 48 / PACIFIC OCEAN	VOLCANIC ROCK	BASALT	4	trough	VOLCANIC GLASS			37.2	214	15.7	51.1	3.05	9.76	19.03	10.61	2.59	0.9	2.73	2.57	1.44	1.38	0.21	1.26	1.499	21.31	143.36	21.31	143.36
2005	[8514] PEARCE J. A.(2005) [GeoReM [496] ]	samp. T7-48:3-1	9729-48:3-1	MARIANA ARC / MARIANA TROUGH / DREDGE 48 / PACIFIC OCEAN	VOLCANIC ROCK	BASALT	4	trough	VOLCANIC GLASS			34.8	194	14.1	45.9	2.69	9.21	18.39	9.98	2.49	0.92	2.66	2.46	1.47	1.32	0.2	1.2	1.432	21.31	143.36	21.31	143.36
2005	[8514] PEARCE J. A.(2005) [GeoReM [496] ]	samp. T7-49:1-1	9726-49:1-1	MARIANA ARC / MARIANA TROUGH / DREDGE 49 / PACIFIC OCEAN	VOLCANIC ROCK	BASALT	4	trough	VOLCANIC GLASS			44	428	18.6	38.1	1.25	3.82	9.4	7.14	2.16	0.82	2.53	2.97	1.89	1.92	0.31	1.15	0.315	22.35	142.91	22.35	142.91
2005	[8514] PEARCE J. A.(2005) [GeoReM [496] ]	samp. T7-71:1-14	9732-71:1-14	MARIANA ARC / MARIANA TROUGH / DREDGE 71 / PACIFIC OCEAN	VOLCANIC ROCK	BASALT	4	trough	VOLCANIC GLASS			31.9	219	24.3	92.1	4.93	9.49	20.48	12.68	3.41	1.17	3.86	3.97	2.32	2.28	0.35	2.09	1.164	20.31	143.93	20.31	143.93
2005	[8514] PEARCE J. A.(2005) [GeoReM [496] ]	samp. T7-72:2	9734-72:2	MARIANA ARC / MARIANA TROUGH / DREDGE 72 / PACIFIC OCEAN	VOLCANIC ROCK	BASALT	4	trough	VOLCANIC GLASS			32.2	240	29	104.6	6.69	8.36	18.83	12.39	3.62	1.22	4.4	4.72	2.81	2.77	0.43	2.59	1	19.83	144.3	19.83	144.3
2005	[8514] PEARCE J. A.(2005) [GeoReM [496] ]	samp. T7-73:1-1	9735-73:1-1	MARIANA ARC / MARIANA TROUGH / DREDGE 73 / PACIFIC OCEAN	VOLCANIC ROCK	BASALT	4	trough	VOLCANIC GLASS			33.9	228	29.2	107.7	5.38	6.39	15.76	11.03	3.38	1.23	4.13	4.64	2.81	2.71	0.43	2.51	0.566	19.73	144.4	19.73	144.4
2005	[8514] PEARCE J. A.(2005) [GeoReM [496] ]	samp. T7-73:2-1	9735-73:2-1	MARIANA ARC / MARIANA TROUGH / DREDGE 73 / PACIFIC OCEAN	VOLCANIC ROCK	BASALT	4	trough	VOLCANIC GLASS			34.2	233	30.1	113.1	5.66	6.46	16.25	11.56	3.52	1.29	4.43	4.84	2.93	2.84	0.44	2.61	0.537	19.73	144.4	19.73	144.4
2005	[8514] PEARCE J. A.(2005) [GeoReM [496] ]	samp. T7-74:1-1	9736-74:1-1	MARIANA ARC / MARIANA TROUGH / DREDGE 74 / PACIFIC OCEAN	VOLCANIC ROCK	BASALT	4	trough	VOLCANIC GLASS			34.2	232	25.2	88.8	4.95	5.77	14.08	10.11	3.05	1.08	3.74	4.12	2.47	2.35	0.36	2.15	0.581	19.67	144.39	19.67	144.39
2005	[8514] PEARCE J. A.(2005) [GeoReM [496] ]	samp. T7-79:1-1	9739-79:1-1	MARIANA ARC / MARIANA TROUGH / DREDGE 79 / PACIFIC OCEAN	VOLCANIC ROCK	BASALT	4	trough	VOLCANIC GLASS			31.3	251	28.1	80.3	2.99	4.28	11.12	9.32	3.06	1.14	3.85	4.52	2.71	2.68	0.41	2.12	0.423	19.19	144.61	19.19	144.61
2005	[8514] PEARCE J. A.(2005) [GeoReM [496] ]	samp. T7-80:1-3	9740-80:1-3	MARIANA ARC / MARIANA TROUGH / DREDGE 80 / PACIFIC OCEAN	VOLCANIC ROCK	BASALT	4	trough	VOLCANIC GLASS			34.9	171	24.7	54.5	1.25	3.13	7.7	6.25	2.21	0.87	3.15	3.82	2.47	2.49	0.38	1.39	0.227	19.12	144.67	19.12	144.67
2005	[8514] PEARCE J. A.(2005) [GeoReM [496] ]	samp. T7-82:1-1	9741-82:1-1	MARIANA ARC / MARIANA TROUGH / DREDGE 82 / PACIFIC OCEAN	VOLCANIC ROCK	BASALT	4	trough	VOLCANIC GLASS			36.3	251	29.7	94.8	2.69	5.18	13.61	10.94	3.42	1.22	4.45	4.73	2.88	2.78	0.43	2.33	0.412	18.75	144.66	18.75	144.66
2005	[8514] PEARCE J. A.(2005) [GeoReM [496] ]	samp. TT65201	12292-65201	MARIANA ARC / MARIANA TROUGH / DREDGE 65 / PACIFIC OCEAN	VOLCANIC ROCK	BASALT	4	trough	VOLCANIC GLASS			34	288	25.7	76.1	2.31	5.86	13.49	10.13	2.97	1.12	3.6	4.13	2.53	2.55	0.4	2.01	0.614	21.9	143.08	21.9	143.08
2005	[8514] PEARCE J. A.(2005) [GeoReM [496] ]	samp. TT6605	12293-6605	MARIANA ARC / MARIANA TROUGH / DREDGE 66 / PACIFIC OCEAN	VOLCANIC ROCK	BASALT	4	trough	VOLCANIC GLASS			38	235	18.6	50.3	1.53	5.71	11.99	8.24	2.31	0.86	2.75	3.03	1.81	1.79	0.27	1.37	0.756	21.78	143.1	21.78	143.1
2005	[8514] PEARCE J. A.(2005) [GeoReM [496] ]	samp. TT6606	12293-6606	MARIANA ARC / MARIANA TROUGH / DREDGE 66 / PACIFIC OCEAN	VOLCANIC ROCK	BASALT	4	trough	VOLCANIC GLASS			36.6	225	17.8	48	1.46	5.37	11.42	7.85	2.2	0.82	2.63	2.9	1.74	1.71	0.26	1.3	0.683	21.78	143.1	21.78	143.1
2005	[8514] PEARCE J. A.(2005) [GeoReM [496] ]	samp. TT6705	12294-6705	MARIANA ARC / MARIANA TROUGH / DREDGE 67 / PACIFIC OCEAN	VOLCANIC ROCK	BASALT	4	trough	VOLCANIC GLASS			36.8	260	26.7	90.6	3.05	9.24	19.99	13.34	3.53	1.22	4.03	4.35	2.59	2.57	0.4	2.33	0.955	21.83	143.05	21.83	143.05
2005	[8514] PEARCE J. A.(2005) [GeoReM [496] ]	samp. TT6707	12294-6707	MARIANA ARC / MARIANA TROUGH / DREDGE 67 / PACIFIC OCEAN	VOLCANIC ROCK	BASALT	4	trough	VOLCANIC GLASS			35.8	342	33.6	106.2	1.96	6.88	16.68	13.38	3.93	1.36	4.74	5.43	3.33	3.33	0.52	2.83	0.636	21.83	143.05	21.83	143.05
2005	[8514] PEARCE J. A.(2005) [GeoReM [496] ]	samp. TT6708	12294-6708	MARIANA ARC / MARIANA TROUGH / DREDGE 67 / PACIFIC OCEAN	VOLCANIC ROCK	BASALT	4	trough	VOLCANIC GLASS			33.2	218	21.3	75.6	3.74	5.8	13.32	9.49	2.65	0.95	3.15	3.51	2.11	2.07	0.32	1.89	0.56	21.83	143.05	21.83	143.05
2005	[8514] PEARCE J. A.(2005) [GeoReM [496] ]	samp. TT6801	12295-6801	MARIANA ARC / MARIANA TROUGH / DREDGE 68 / PACIFIC OCEAN	VOLCANIC ROCK	BASALT	4	trough	VOLCANIC GLASS			32.9	228	22	84.8	5.34	8.67	17.44	11.22	2.95	1.04	3.34	3.59	2.13	2.11	0.33	2.05	0.884	21.7	143.17	21.7	143.17
2005	[8514] PEARCE J. A.(2005) [GeoReM [496] ]	samp. TT6803	12295-6803	MARIANA ARC / MARIANA TROUGH / DREDGE 68 / PACIFIC OCEAN	VOLCANIC ROCK	BASALT	4	trough	VOLCANIC GLASS			33.6	230	22	83.9	5.05	7.95	16.87	11.02	2.92	1.04	3.34	3.6	2.15	2.12	0.33	2.06	0.821	21.7	143.17	21.7	143.17
2006	[9036] STERN R. J.(2006) [GeoReM [1120] ]	samp. D48-1-4		MARIANA ARC / MARIANA ARC - CENTRAL ISLAND PROVINCE / GUGUAN / PACIFIC OCEAN	VOLCANIC ROCK	ANDESITE	5	arc	WHOLE ROCK	0.61	3656.03	26	177	19.8	77	2.01	7.51	14.82	8.65	2.35	0.67	2.2	2.67	1.74	1.8	0.26		1.09	17.275	145.623	17.275	145.623
2011	[15566] MARSKE J. P.(2011) [GeoReM [6201] ]	samp. TM-06-03		MARIANA ARC / MARIANA ARC - CENTRAL ISLAND PROVINCE / PAGAN / PAGAN CENTRAL VOLCANIC REGION	VOLCANIC ROCK	ANDESITE	5	arc	WHOLE ROCK	0.74	4435.18	17	213	26.1	92	2.09	9.17	19.6	13.3	3.7	1.2	4.3	4.74	2.86	2.8	0.46	2.17	1.27	18.0873	145.751	18.0873	145.751
2014	[18072] TAMURA Y.(2014) [GeoReM [7895] ]	samp. HPD1148R13		MARIANA ARC / MARIANA ARC - CENTRAL ISLAND PROVINCE / PAGAN / PAGAN CENTRAL VOLCANIC REGION	VOLCANIC ROCK	ANDESITE	5	arc	WHOLE ROCK	0.76	4555.05		137	35.6	170.9	3.3	12.6	28.13	18.24	5.08	1.43	5.78	6.18	4.11	3.97	0.63	4.55	3	17.9863	145.641	17.9863	145.641
2014	[18072] TAMURA Y.(2014) [GeoReM [7895] ]	samp. HPD1148R15		MARIANA ARC / MARIANA ARC - CENTRAL ISLAND PROVINCE / PAGAN / PAGAN CENTRAL VOLCANIC REGION	VOLCANIC ROCK	ANDESITE	5	arc	WHOLE ROCK	0.76	4555.05		145.7	33	153.3	2.6	13.09	28.91	18.07	4.96	1.33	5.75	5.96	3.96	3.99	0.62	4.41	2.8	17.9925	145.633	17.9925	145.633
2014	[18072] TAMURA Y.(2014) [GeoReM [7895] ]	samp. HPD1148R16		MARIANA ARC / MARIANA ARC - CENTRAL ISLAND PROVINCE / PAGAN / PAGAN CENTRAL VOLCANIC REGION	VOLCANIC ROCK	ANDESITE	5	arc	WHOLE ROCK	0.76	4555.05		145.6	33.7	157.4	2.7	13.01	27.6	18.04	4.64	1.34	5.33	5.77	3.75	3.78	0.59	4.19	1.5	17.9928	145.633	17.9928	145.633
2014	[18072] TAMURA Y.(2014) [GeoReM [7895] ]	samp. HPD1148R19		MARIANA ARC / MARIANA ARC - CENTRAL ISLAND PROVINCE / PAGAN / PAGAN CENTRAL VOLCANIC REGION	VOLCANIC ROCK	ANDESITE	5	arc	WHOLE ROCK	0.77	4614.99		137	33.8	156.2	3	12.52	27.55	17.3	4.7	1.29	5.51	5.68	3.73	3.71	0.58	4.07	3	17.9948	145.644	17.9948	145.644
2014	[18072] TAMURA Y.(2014) [GeoReM [7895] ]	samp. HPD1148R21		MARIANA ARC / MARIANA ARC - CENTRAL ISLAND PROVINCE / PAGAN / PAGAN CENTRAL VOLCANIC REGION	VOLCANIC ROCK	ANDESITE	5	arc	WHOLE ROCK	0.78	4674.92		123	34.7	161.5	2.9	12.56	27.88	17.91	4.85	1.37	5.66	5.94	4.03	3.8	0.63	4.3	1.4	17.9967	145.644	17.9967	145.644
2011	[15566] MARSKE J. P.(2011) [GeoReM [6201] ]	samp. TM-06-18		MARIANA ARC / MARIANA ARC - CENTRAL ISLAND PROVINCE / PAGAN / PAGAN SOUTH	VOLCANIC ROCK	ANDESITE	5	arc	WHOLE ROCK	0.79	4734.86	15	148	34.6	158	3.53	14	30.1	19.5	5.24	1.39	5.96	6.47	3.91	3.78	0.6	3.83	2.3	18.075	145.732	18.075	145.732
2014	[18072] TAMURA Y.(2014) [GeoReM [7895] ]	samp. HPD1148R14		MARIANA ARC / MARIANA ARC - CENTRAL ISLAND PROVINCE / PAGAN / PAGAN CENTRAL VOLCANIC REGION	VOLCANIC ROCK	ANDESITE	5	arc	WHOLE ROCK	0.8	4794.79		158.7	31.6	145.8	2.8	11.99	25.92	17.08	4.62	1.31	5.38	5.49	3.56	3.59	0.55	3.96	1.3	17.992	145.63	17.992	145.63
2014	[18072] TAMURA Y.(2014) [GeoReM [7895] ]	samp. HPD1148R18		MARIANA ARC / MARIANA ARC - CENTRAL ISLAND PROVINCE / PAGAN / PAGAN CENTRAL VOLCANIC REGION	VOLCANIC ROCK	ANDESITE	5	arc	WHOLE ROCK	0.8	4794.79		149	33.6	153.6	2.7	12.19	26.65	17.04	4.73	1.27	5.25	5.74	3.65	3.67	0.56	4.05	2	17.9937	145.634	17.9937	145.634
2005	[8033] WADE J. A. (2005)	samp. ANAT4-S		MARIANA ARC / MARIANA ARC - CENTRAL ISLAND PROVINCE / ANATAHAN / ANATAHAN / PACIFIC OCEAN	VOLCANIC ROCK	ANDESITE	5	arc	WHOLE ROCK	0.804	4818.77	23.4	79.5	41.6	126	2.88	13.7	29.1	19.9	5.46	1.68	6.57	6.97	4.26	4.16	0.679	3.41	2.02	16.37	145.63	16.37	145.63
2011	[15566] MARSKE J. P.(2011) [GeoReM [6201] ]	samp. TM-06-34		MARIANA ARC / MARIANA ARC - CENTRAL ISLAND PROVINCE / PAGAN / PAGAN CENTRAL VOLCANIC REGION	VOLCANIC ROCK	ANDESITE	5	arc	WHOLE ROCK	0.81	4854.73	22.8	281	22.6	71	1.68	7.4	15.7	11.1	3.2	1.08	3.78	4.11	2.46	2.33	0.37	1.71	0.92	18.1	145.75	18.17	145.81
2014	[18072] TAMURA Y.(2014) [GeoReM [7895] ]	samp. HPD1148R22		MARIANA ARC / MARIANA ARC - CENTRAL ISLAND PROVINCE / PAGAN / PAGAN CENTRAL VOLCANIC REGION	VOLCANIC ROCK	ANDESITE	5	arc	WHOLE ROCK	0.82	4914.66		181.9	31.2	134.6	2.5	11.59	25.41	16.02	4.31	1.25	4.75	5.26	3.3	3.34	0.5	3.52	1.5	17.9982	145.644	17.9982	145.644
2005	[8033] WADE J. A. (2005)	samp. AN-12D		MARIANA ARC / MARIANA ARC - CENTRAL ISLAND PROVINCE / ANATAHAN / ANATAHAN / PACIFIC OCEAN	VOLCANIC ROCK	ANDESITE	5	arc	WHOLE ROCK	0.83	4974.6	23.1	56.5	44.2	133	3.17	14	30.3	20.7	5.61	1.69	6.86	7.02	4.35	4.32	0.686	3.71	2.08	16.37	145.63	16.37	145.63
2005	[8033] WADE J. A. (2005)	samp. AN-12A	8459-AN12A	MARIANA ARC / MARIANA ARC - CENTRAL ISLAND PROVINCE / ANATAHAN / ANATAHAN / PACIFIC OCEAN	VOLCANIC ROCK	ANDESITE	5	arc	WHOLE ROCK	0.84	5034.53	23.9	54.4	43.9	131	3.13	14.1	30.5	20.7	5.65	1.7	6.81	7.08	4.37	4.33	0.688	3.68	2.11	16.37	145.63	16.37	145.63
2005	[8033] WADE J. A. (2005)	samp. AN-12F		MARIANA ARC / MARIANA ARC - CENTRAL ISLAND PROVINCE / ANATAHAN / ANATAHAN / PACIFIC OCEAN	VOLCANIC ROCK	ANDESITE	5	arc	WHOLE ROCK	0.84	5034.53	23.7	57.6	45.6	131	3.2	14.4	31.3	21.2	5.76	1.73	6.91	7.19	4.42	4.39	0.697	3.68	2.09	16.37	145.63	16.37	145.63
2005	[8033] WADE J. A. (2005)	samp. ANAT-26-01		MARIANA ARC / MARIANA ARC - CENTRAL ISLAND PROVINCE / ANATAHAN / ANATAHAN / PACIFIC OCEAN	VOLCANIC ROCK	ANDESITE	5	arc	WHOLE ROCK	0.843	5052.51	24.7	108	35	106	2.54	11.3	24.8	16.8	4.56	1.43	5.37	5.66	3.46	3.48	0.547	2.99	1.69	16.3358	145.658	16.3358	145.658
2005	[8033] WADE J. A. (2005)	samp. ANAT10-P		MARIANA ARC / MARIANA ARC - CENTRAL ISLAND PROVINCE / ANATAHAN / ANATAHAN / PACIFIC OCEAN	VOLCANIC ROCK	ANDESITE	5	arc	WHOLE ROCK	0.85	5094.47	26.6	125	37.2	115	2.8	11.6	25.5	17.7	4.88	1.6	5.7	6.16	3.67	3.64	0.569	3.07	1.75	16.3619	145.634	16.3619	145.634
2005	[8033] WADE J. A. (2005)	samp. ANAT11		MARIANA ARC / MARIANA ARC - CENTRAL ISLAND PROVINCE / ANATAHAN / ANATAHAN / PACIFIC OCEAN	VOLCANIC ROCK	ANDESITE	5	arc	WHOLE ROCK	0.859	5148.41	27	136	36.1	107	2.66	11.7	24.7	17	4.72	1.53	5.69	6.02	3.7	3.59	0.587	2.84	1.65	16.3619	145.634	16.3619	145.634
2005	[8033] WADE J. A. (2005)	samp. ANAT12-P		MARIANA ARC / MARIANA ARC - CENTRAL ISLAND PROVINCE / ANATAHAN / ANATAHAN / PACIFIC OCEAN	VOLCANIC ROCK	ANDESITE	5	arc	WHOLE ROCK	0.859	5148.41	28	125	39.1	116	2.76	12.6	26.8	18.5	5.06	1.65	6.23	6.58	4.02	3.92	0.634	3.15	1.84	16.3619	145.634	16.3619	145.634
2005	[8033] WADE J. A. (2005)	samp. ANAT6-P		MARIANA ARC / MARIANA ARC - CENTRAL ISLAND PROVINCE / ANATAHAN / ANATAHAN / PACIFIC OCEAN	VOLCANIC ROCK	ANDESITE	5	arc	WHOLE ROCK	0.861	5160.39	26.8	124	38.8	120	2.64	12.1	26.7	18.5	5.07	1.65	5.99	6.36	3.8	3.8	0.593	3.17	1.82	16.3619	145.634	16.3619	145.634
2005	[8033] WADE J. A. (2005)	samp. ANAT8-P		MARIANA ARC / MARIANA ARC - CENTRAL ISLAND PROVINCE / ANATAHAN / ANATAHAN / PACIFIC OCEAN	VOLCANIC ROCK	ANDESITE	5	arc	WHOLE ROCK	0.863	5172.38	26.6	124	38.3	117	2.9	12	26.4	18.3	5.01	1.61	5.92	6.25	3.73	3.73	0.585	3.18	1.79	16.3619	145.634	16.3619	145.634
2005	[8033] WADE J. A. (2005)	samp. 04-ANAT-01		MARIANA ARC / MARIANA ARC - CENTRAL ISLAND PROVINCE / ANATAHAN / ANATAHAN / PACIFIC OCEAN	VOLCANIC ROCK	ANDESITE	5	arc	WHOLE ROCK	0.874	5238.31	23.1	68.9	39.1	118	2.94	12.6	27.7	18.8	5.1	1.58	6.02	6.33	3.87	3.86	0.608	3.32	1.84	16.3358	145.658	16.3358	145.658
2005	[8033] WADE J. A. (2005)	samp. ANAT-26-02		MARIANA ARC / MARIANA ARC - CENTRAL ISLAND PROVINCE / ANATAHAN / ANATAHAN / PACIFIC OCEAN	VOLCANIC ROCK	ANDESITE	5	arc	WHOLE ROCK	0.878	5262.28	26.3	142	33.3	98	2.48	10.8	24	16.8	4.59	1.44	5.24	5.5	3.38	3.44	0.538	2.8	1.53	16.3358	145.658	16.3358	145.658
2005	[8033] WADE J. A. (2005)	samp. ANAT5		MARIANA ARC / MARIANA ARC - CENTRAL ISLAND PROVINCE / ANATAHAN / ANATAHAN / PACIFIC OCEAN	VOLCANIC ROCK	ANDESITE	5	arc	WHOLE ROCK	0.879	5268.28	26.8	139	36.2	110	2.53	11.2	24.5	17	4.73	1.55	5.49	5.87	3.54	3.54	0.554	2.96	1.69	16.3619	145.634	16.3619	145.634
2005	[8033] WADE J. A. (2005)	samp. ANAT12-S		MARIANA ARC / MARIANA ARC - CENTRAL ISLAND PROVINCE / ANATAHAN / ANATAHAN / PACIFIC OCEAN	VOLCANIC ROCK	ANDESITE	5	arc	WHOLE ROCK	0.881	5280.26	27.3	132	37.9	112	2.91	12.2	25.9	17.9	4.9	1.62	6.03	6.45	3.89	3.89	0.624	3.12	1.85	16.3619	145.634	16.3619	145.634
2005	[8033] WADE J. A. (2005)	samp. ANAT1		MARIANA ARC / MARIANA ARC - CENTRAL ISLAND PROVINCE / ANATAHAN / ANATAHAN / PACIFIC OCEAN	VOLCANIC ROCK	ANDESITE	5	arc	WHOLE ROCK	0.884	5298.24	26.5	98.1	40.9	123	2.89	13.2	28	19.3	5.29	1.69	6.54	6.88	4.23	4.15	0.66	3.34	1.94	16.37	145.63	16.37	145.63
2005	[8033] WADE J. A. (2005)	samp. ANAT6-S		MARIANA ARC / MARIANA ARC - CENTRAL ISLAND PROVINCE / ANATAHAN / ANATAHAN / PACIFIC OCEAN	VOLCANIC ROCK	ANDESITE	5	arc	WHOLE ROCK	0.891	5340.2	28.1	138	37.6	116	2.64	11.6	25.5	17.8	4.92	1.61	5.81	6.16	3.73	3.71	0.583	3.07	1.75	16.3619	145.634	16.3619	145.634
2005	[8033] WADE J. A. (2005)	samp. ANAT8-S		MARIANA ARC / MARIANA ARC - CENTRAL ISLAND PROVINCE / ANATAHAN / ANATAHAN / PACIFIC OCEAN	VOLCANIC ROCK	ANDESITE	5	arc	WHOLE ROCK	0.893	5352.19	28	139	38.6	117	2.81	11.8	26.2	18.2	5.02	1.62	5.9	6.3	3.76	3.77	0.586	3.14	1.79	16.3619	145.634	16.3619	145.634
2005	[8033] WADE J. A. (2005)	samp. ANAT7-S		MARIANA ARC / MARIANA ARC - CENTRAL ISLAND PROVINCE / ANATAHAN / ANATAHAN / PACIFIC OCEAN	VOLCANIC ROCK	ANDESITE	5	arc	WHOLE ROCK	0.895	5364.17	27.1	134	38	117	2.62	11.7	25.8	18	4.94	1.62	5.8	6.21	3.74	3.73	0.582	3.11	1.77	16.3619	145.634	16.3619	145.634
2005	[8033] WADE J. A. (2005)	samp. ANAT10-S		MARIANA ARC / MARIANA ARC - CENTRAL ISLAND PROVINCE / ANATAHAN / ANATAHAN / PACIFIC OCEAN	VOLCANIC ROCK	ANDESITE	5	arc	WHOLE ROCK	0.904	5418.11	28.5	134	39.1	116	2.83	12.4	26.2	18.1	4.98	1.64	6.09	6.52	3.94	3.88	0.61	3.08	1.78	16.3619	145.634	16.3619	145.634
1999	[5803] PEARCE J. A. (1999)	samp. 115263		MARIANA ARC / MARIANA ARC - CENTRAL ISLAND PROVINCE / AGRIGAN / AGRIGAN / PACIFIC OCEAN	VOLCANIC ROCK	ANDESITE	5	arc	WHOLE ROCK	0.91	5454.08			38.4	129.2	2.59	14.01	29.65	19.63	5.09	1.47	5.63	6.07	3.7	3.77	0.61	3.55	2.06	18.73	145.65	18.73	145.65
2005	[8033] WADE J. A. (2005)	samp. EC-5		MARIANA ARC / MARIANA ARC - CENTRAL ISLAND PROVINCE / ANATAHAN / ANATAHAN / PACIFIC OCEAN	VOLCANIC ROCK	ANDESITE	5	arc	WHOLE ROCK	0.927	5555.96	28.8	124	40.9	122	2.82	12.8	28.1	19	5.16	1.64	6.17	6.56	4.02	4.04	0.634	3.36	1.88	16.3463	145.665	16.3463	145.665
2005	[8033] WADE J. A. (2005)	samp. AN-6	8459-AN6	MARIANA ARC / MARIANA ARC - CENTRAL ISLAND PROVINCE / ANATAHAN / ANATAHAN / PACIFIC OCEAN	VOLCANIC ROCK	ANDESITE	5	arc	WHOLE ROCK	0.93	5573.94	23.2	55.9	43	131	3.13	13.8	30.6	20.5	5.62	1.65	6.66	6.96	4.24	4.28	0.674	3.51	2.03	16.37	145.63	16.37	145.63
2005	[8033] WADE J. A. (2005)	samp. 04-ANAT-02		MARIANA ARC / MARIANA ARC - CENTRAL ISLAND PROVINCE / ANATAHAN / ANATAHAN / PACIFIC OCEAN	VOLCANIC ROCK	ANDESITE	5	arc	WHOLE ROCK	0.977	5855.64	23	144	30.5	95	2.34	10.2	22.2	14.9	4	1.3	4.74	4.98	3.04	3.05	0.48	2.68	1.51	16.3364	145.679	16.3364	145.679
1997	[2374] ELLIOTT T. R. (1997)	samp. URA5	9714-URA5	MARIANA ARC / MARIANA ARC - CENTRAL ISLAND PROVINCE / URACAS / URACAS / PACIFIC OCEAN	VOLCANIC ROCK	ANDESITE, BASALTIC	6	arc	WHOLE ROCK	0.63	3775.9		235	20.2	49	1.04	4.45	10.17	7.25	2.15	0.81	2.8	3.19	1.99	2.05	0.324	1.37	0.597	20.54	145.87	20.54	145.87
1984	[2698] HOLE M. J. (1984)	samp. AS6	8318-AS6	MARIANA ARC / MARIANA ARC - CENTRAL ISLAND PROVINCE / ASUNCION / PACIFIC OCEAN	VOLCANIC ROCK	ANDESITE, BASALTIC	6	arc	WHOLE ROCK	0.7	4195.44		230	24	60	1	4.8	10	7.7	2.77	0.95	3.2			2.47	0.38	1.72	0.64	19.57	145.4	19.57	145.4
2005	[8033] WADE J. A. (2005)	samp. AN-2	8459-AN2	MARIANA ARC / MARIANA ARC - CENTRAL ISLAND PROVINCE / ANATAHAN / ANATAHAN / PACIFIC OCEAN	VOLCANIC ROCK	ANDESITE, BASALTIC	6	arc	WHOLE ROCK	0.71	4255.38	25.5	210	20.6	50.1	1.14	5.25	11.5	8.6	2.49	0.901	3.1	3.38	2.03	2.07	0.322	1.41	0.658	16.37	145.63	16.37	145.63
1997	[2374] ELLIOTT T. R. (1997)	samp. URA12	9716-URA12	MARIANA ARC / MARIANA ARC - CENTRAL ISLAND PROVINCE / URACAS / URACAS / PACIFIC OCEAN	VOLCANIC ROCK	ANDESITE, BASALTIC	6	arc	WHOLE ROCK	0.75	4495.12		208	23	59.4	1.6	7.29	15.57	9.98	2.79	1	3.41	3.8	2.34	2.35	0.385	1.66	1.132	20.55	145.86	20.55	145.86
2005	[8033] WADE J. A. (2005)	samp. 04-ANAT-03		MARIANA ARC / MARIANA ARC - CENTRAL ISLAND PROVINCE / ANATAHAN / ANATAHAN / PACIFIC OCEAN	VOLCANIC ROCK	ANDESITE, BASALTIC	6	arc	WHOLE ROCK	0.755	4525.08	22.1	141	29.7	91	2.23	9.8	21.4	14.4	3.9	1.27	4.57	4.85	2.95	2.93	0.46	2.57	1.44	16.337	145.662	16.337	145.662
2011	[15566] MARSKE J. P.(2011) [GeoReM [6201] ]	samp. TM-06-202		MARIANA ARC / MARIANA ARC - CENTRAL ISLAND PROVINCE / PAGAN / PAGAN SOUTH	VOLCANIC ROCK	ANDESITE, BASALTIC	6	arc	WHOLE ROCK	0.76	4555.05	22.7	254	21.3	75	1.8	7.47	16.1	11.1	3.15	0.99	3.69	4.05	2.42	2.29	0.37	1.82	1.01	18.0617	145.717	18.0617	145.717
1997	[2374] ELLIOTT T. R. (1997)	samp. URA7	9715-URA 7	MARIANA ARC / MARIANA ARC - CENTRAL ISLAND PROVINCE / URACAS / URACAS / PACIFIC OCEAN	VOLCANIC ROCK	ANDESITE, BASALTIC	6	arc	WHOLE ROCK	0.77	4614.99		232	24	62.6	1.66	7.97	16.8	10.75	2.97	1.07	3.68	4.19	2.56	2.55	0.406	1.76	1.224	20.54	145.86	20.54	145.86
2005	[8033] WADE J. A. (2005)	samp. 04-ANAT-04		MARIANA ARC / MARIANA ARC - CENTRAL ISLAND PROVINCE / ANATAHAN / ANATAHAN / PACIFIC OCEAN	VOLCANIC ROCK	ANDESITE, BASALTIC	6	arc	WHOLE ROCK	0.778	4662.93	25.7	188	27.3	79	2.59	8.2	17.9	12.3	3.41	1.15	4.05	4.38	2.7	2.69	0.419	2.24	1.23	16.3393	145.64	16.3393	145.64
2011	[15566] MARSKE J. P.(2011) [GeoReM [6201] ]	samp. TM-06-275		MARIANA ARC / MARIANA ARC - CENTRAL ISLAND PROVINCE / PAGAN / PAGAN SOUTH	VOLCANIC ROCK	ANDESITE, BASALTIC	6	arc	WHOLE ROCK	0.78	4674.92	23.1	269	24.4	90	1.94	8.07	17.6	12	3.41	1.02	3.97	4.34	2.59	2.46	0.39	2.16	1.24	18.0627	145.717	18.0627	145.717
1997	[2374] ELLIOTT T. R. (1997)	samp. ALAM2	9702-ALAM2	MARIANA ARC / MARIANA ARC - CENTRAL ISLAND PROVINCE / ALAMAGAN / PACIFIC OCEAN	VOLCANIC ROCK	ANDESITE, BASALTIC	6	arc	WHOLE ROCK	0.78	4674.92		218	26.7	82.9	1.3	5.9	14.04	10.33	3.05	0.97	3.86	4.29	2.69	2.73	0.443	2.33	0.799	17.62	145.83	17.62	145.83
1997	[2374] ELLIOTT T. R. (1997)	samp. SAG1	9698-SAG1	MARIANA ARC / MARIANA ARC - CENTRAL ISLAND PROVINCE / SARIGAN / PACIFIC OCEAN	VOLCANIC ROCK	ANDESITE, BASALTIC	6	arc	WHOLE ROCK	0.78	4674.92		233	23.5	68.5	1.64	6.17	13.98	10.01	2.86	1.01	3.51	3.75	2.29	2.28	0.35	1.9	0.828	16.71	145.81	16.71	145.81
2005	[8033] WADE J. A. (2005)	samp. AN-11	8459-AN11	MARIANA ARC / MARIANA ARC - CENTRAL ISLAND PROVINCE / ANATAHAN / ANATAHAN / PACIFIC OCEAN	VOLCANIC ROCK	ANDESITE, BASALTIC	6	arc	WHOLE ROCK	0.78	4674.92	29.7	246	23.6	55.6	1.2	5.78	12.9	9.46	2.81	0.966	3.5	3.86	2.37	2.37	0.368	1.6	0.802	16.37	145.63	16.37	145.63
2011	[15566] MARSKE J. P.(2011) [GeoReM [6201] ]	samp. TM-06-24		MARIANA ARC / MARIANA ARC - CENTRAL ISLAND PROVINCE / PAGAN / PAGAN SOUTH	VOLCANIC ROCK	ANDESITE, BASALTIC	6	arc	WHOLE ROCK	0.79	4734.86	21.7	271	22.7	78	1.82	7.56	16.4	11.2	3.2	1.03	3.75	4.06	2.45	2.34	0.37	1.95	1.09	18.0703	145.72	18.0703	145.72
2005	[8033] WADE J. A. (2005)	samp. AN-5	8459-AN5	MARIANA ARC / MARIANA ARC - CENTRAL ISLAND PROVINCE / ANATAHAN / ANATAHAN / PACIFIC OCEAN	VOLCANIC ROCK	ANDESITE, BASALTIC	6	arc	WHOLE ROCK	0.79	4734.86	31.1	260	24.5	58.6	1.28	5.98	13.4	9.85	2.93	1.01	3.7	4.04	2.49	2.47	0.389	1.69	0.835	16.37	145.63	16.37	145.63
2005	[8033] WADE J. A. (2005)	samp. AN-7		MARIANA ARC / MARIANA ARC - CENTRAL ISLAND PROVINCE / ANATAHAN / ANATAHAN / PACIFIC OCEAN	VOLCANIC ROCK	ANDESITE, BASALTIC	6	arc	WHOLE ROCK	0.79	4734.86	30.3	255	24.7	61.7	1.2	5.79	13.4	9.67	2.89	0.992	3.61	3.97	2.42	2.43	0.387	1.67	0.798	16.37	145.63	16.37	145.63
2011	[15566] MARSKE J. P.(2011) [GeoReM [6201] ]	samp. TM-06-214		MARIANA ARC / MARIANA ARC - CENTRAL ISLAND PROVINCE / PAGAN / PAGAN SOUTH	VOLCANIC ROCK	ANDESITE, BASALTIC	6	arc	WHOLE ROCK	0.8	4794.79	24	271	24	88	1.98	8.05	17.6	12	3.39	1.05	4.05	4.38	2.59	2.48	0.39	2.13	1.23	18.081	145.732	18.081	145.732
1997	[2374] ELLIOTT T. R. (1997)	samp. ALAM5	9703-ALAM5	MARIANA ARC / MARIANA ARC - CENTRAL ISLAND PROVINCE / ALAMAGAN / PACIFIC OCEAN	VOLCANIC ROCK	ANDESITE, BASALTIC	6	arc	WHOLE ROCK	0.81	4854.73		264	24.1	74.4	1.24	5.85	13.51	10.12	2.99	1.01	3.73	4.1	2.54	2.53	0.394	2.18	0.77	17.59	145.83	17.59	145.83
1997	[2374] ELLIOTT T. R. (1997)	samp. GUG11	8458-GUG11	MARIANA ARC / MARIANA ARC - CENTRAL ISLAND PROVINCE / GUGUAN / PACIFIC OCEAN	VOLCANIC ROCK	ANDESITE, BASALTIC	6	arc	WHOLE ROCK	0.81	4854.73		241	23.5	60	0.7	3.18	8.53	7.47	2.43	0.92	3.19	3.72	2.38	2.46	0.391	1.7	0.282	17.33	145.85	17.33	145.85
1997	[2374] ELLIOTT T. R. (1997)	samp. GUG12	8458-GUG12	MARIANA ARC / MARIANA ARC - CENTRAL ISLAND PROVINCE / GUGUAN / PACIFIC OCEAN	VOLCANIC ROCK	ANDESITE, BASALTIC	6	arc	WHOLE ROCK	0.81	4854.73		286	21.7	53.5	0.72	3.26	8.43	7.08	2.27	0.84	2.94	3.38	2.15	2.18	0.345	1.5	0.319	17.33	145.85	17.33	145.85
1997	[2374] ELLIOTT T. R. (1997)	samp. GUG4	9699-GUG4	MARIANA ARC / MARIANA ARC - CENTRAL ISLAND PROVINCE / GUGUAN / PACIFIC OCEAN	VOLCANIC ROCK	ANDESITE, BASALTIC	6	arc	WHOLE ROCK	0.82	4914.66		259	22.8	57.9	0.81	3.55	9.11	7.58	2.39	0.86	3.23	3.57	2.26	2.3	0.365	1.63	0.367	17.32	145.84	17.32	145.84
1997	[2374] ELLIOTT T. R. (1997)	samp. URA6	9714-URA6	MARIANA ARC / MARIANA ARC - CENTRAL ISLAND PROVINCE / URACAS / URACAS / PACIFIC OCEAN	VOLCANIC ROCK	ANDESITE, BASALTIC	6	arc	WHOLE ROCK	0.83	4974.6		120	36.4	96.1	2.11	10.05	22.2	14.92	4.3	1.45	5.33	6.04	3.85	3.92	0.617	2.78	1.406	20.54	145.87	20.54	145.87
1984	[2698] HOLE M. J. (1984)	samp. AS3	8318-AS3	MARIANA ARC / MARIANA ARC - CENTRAL ISLAND PROVINCE / ASUNCION / PACIFIC OCEAN	VOLCANIC ROCK	ANDESITE, BASALTIC	6	arc	WHOLE ROCK	0.84	5034.53		300	25	59	1	4.3	10.4	8.9	2.92	1.09	3.32			2.55	0.42	1.65	0.64	19.57	145.4	19.57	145.4
1984	[2698] HOLE M. J. (1984)	samp. AS1	8318-AS1	MARIANA ARC / MARIANA ARC - CENTRAL ISLAND PROVINCE / ASUNCION / PACIFIC OCEAN	VOLCANIC ROCK	ANDESITE, BASALTIC	6	arc	WHOLE ROCK	0.85	5094.47		299	24	60	1	4.4	9.3	7.7	2.64	1.01	2.46			2.48	0.41	1.67	0.62	19.57	145.4	19.57	145.4
1984	[2698] HOLE M. J. (1984)	samp. AS5	8318-AS5	MARIANA ARC / MARIANA ARC - CENTRAL ISLAND PROVINCE / ASUNCION / PACIFIC OCEAN	VOLCANIC ROCK	ANDESITE, BASALTIC	6	arc	WHOLE ROCK	0.86	5154.4		263	28	65	1	4.7	11.3	9.7	3.09	1.15	3.68			2.76	0.46	1.78	0.65	19.57	145.4	19.57	145.4
2011	[15566] MARSKE J. P.(2011) [GeoReM [6201] ]	samp. TM-06-05		MARIANA ARC / MARIANA ARC - CENTRAL ISLAND PROVINCE / PAGAN / PAGAN SOUTH	VOLCANIC ROCK	ANDESITE, BASALTIC	6	arc	WHOLE ROCK	0.87	5214.34	17.5	246	26.6	98	2.2	9.1	20	13.8	3.85	1.19	4.54	4.96	2.95	2.8	0.45	2.39	1.3	18.0511	145.719	18.0511	145.719
1997	[2374] ELLIOTT T. R. (1997)	samp. ACS3	9713-ACS3	MARIANA ARC / MARIANA ARC - CENTRAL ISLAND PROVINCE / ASUNCION / PACIFIC OCEAN	VOLCANIC ROCK	ANDESITE, BASALTIC	6	arc	WHOLE ROCK	0.87	5214.34		232	26	63	0.95	4.77	11.74	9.3	2.93	1.04	3.71	4.29	2.66	2.7	0.432	1.77	0.514	19.7	145.4	19.7	145.4
1997	[2374] ELLIOTT T. R. (1997)	samp. MM-92-6	9712-MM-92-6	MARIANA ARC / MARIANA ARC - CENTRAL ISLAND PROVINCE / AGRIGAN / AGRIGAN / PACIFIC OCEAN	VOLCANIC ROCK	ANDESITE, BASALTIC	6	arc	WHOLE ROCK	0.87	5214.34		205	29.8	96.3	1.86	11.41	23.98	15.88	4.11	1.37	4.84	4.93	2.98	2.94	0.472	2.59	1.376	18.77	145.67	18.77	145.67
1984	[2698] HOLE M. J. (1984)	samp. AS4	8318-AS4	MARIANA ARC / MARIANA ARC - CENTRAL ISLAND PROVINCE / ASUNCION / PACIFIC OCEAN	VOLCANIC ROCK	ANDESITE, BASALTIC	6	arc	WHOLE ROCK	0.87	5214.34		253	27	62	1	5.1	11.3	9.1	3.02	1.17	3.76			2.88	0.47	1.77	0.66	19.57	145.4	19.57	145.4
1997	[2374] ELLIOTT T. R. (1997)	samp. MM-92-10	9706-MM-92-10	MARIANA ARC / MARIANA ARC - CENTRAL ISLAND PROVINCE / PAGAN / PACIFIC OCEAN	VOLCANIC ROCK	ANDESITE, BASALTIC	6	arc	WHOLE ROCK	1.22	7312.06		289.4	37.2	116.6	2.17	10.55	23.9	17.44	4.95	1.58	5.91	6.24	3.78	3.73	0.585	3.26	1.16	18.12	145.76	18.12	145.76
2014	[18072] TAMURA Y.(2014) [GeoReM [7895] ]	samp. HPD1147R01		MARIANA ARC / MARIANA ARC - CENTRAL ISLAND PROVINCE / PAGAN / PAGAN CENTRAL VOLCANIC REGION	VOLCANIC ROCK	BASALT	7	arc	WHOLE ROCK	0.4	2397.4		228.8	9.3	17	0.23	1.4	3.66	2.93	1.06	0.44	1.49	1.62	1.05	1.06	0.15	0.54	0.108	18.2424	145.867	18.2424	145.867
2014	[18072] TAMURA Y.(2014) [GeoReM [7895] ]	samp. HPD1147R03		MARIANA ARC / MARIANA ARC - CENTRAL ISLAND PROVINCE / PAGAN / PAGAN CENTRAL VOLCANIC REGION	VOLCANIC ROCK	BASALT	7	arc	WHOLE ROCK	0.4	2397.4		248.5	9.4	17.3	0.22	1.44	3.85	3.09	1.1	0.48	1.49	1.65	1.03	1.01	0.16	0.53	0.105	18.2414	145.87	18.2414	145.87
2014	[18072] TAMURA Y.(2014) [GeoReM [7895] ]	samp. HPD1147R05		MARIANA ARC / MARIANA ARC - CENTRAL ISLAND PROVINCE / PAGAN / PAGAN CENTRAL VOLCANIC REGION	VOLCANIC ROCK	BASALT	7	arc	WHOLE ROCK	0.4	2397.4		250.5	9.3	17.3	0.23	1.42	3.71	2.94	1.04	0.43	1.42	1.56	1.05	1.03	0.16	0.53	0.123	18.2394	145.867	18.2394	145.867
2014	[18072] TAMURA Y.(2014) [GeoReM [7895] ]	samp. HPD1147R06		MARIANA ARC / MARIANA ARC - CENTRAL ISLAND PROVINCE / PAGAN / PAGAN CENTRAL VOLCANIC REGION	VOLCANIC ROCK	BASALT	7	arc	WHOLE ROCK	0.4	2397.4		229.3	9.3	17.1	0.23	1.4	3.68	3.05	1.15	0.46	1.46	1.68	1.01	1.01	0.16	0.54	0.099	18.2387	145.877	18.2387	145.877
2014	[18072] TAMURA Y.(2014) [GeoReM [7895] ]	samp. HPD1147R02		MARIANA ARC / MARIANA ARC - CENTRAL ISLAND PROVINCE / PAGAN / PAGAN CENTRAL VOLCANIC REGION	VOLCANIC ROCK	BASALT	7	arc	WHOLE ROCK	0.41	2457.33		242	8.7	17.2	0.22	1.38	3.7	3.01	1.11	0.44	1.4	1.68	1.02	1.03	0.16	0.53	0.105	18.2421	145.871	18.2421	145.871
2014	[18072] TAMURA Y.(2014) [GeoReM [7895] ]	samp. HPD1147R04		MARIANA ARC / MARIANA ARC - CENTRAL ISLAND PROVINCE / PAGAN / PAGAN CENTRAL VOLCANIC REGION	VOLCANIC ROCK	BASALT	7	arc	WHOLE ROCK	0.41	2457.33		246.8	9.2	17	0.23	1.4	3.71	3.03	1.1	0.45	1.51	1.59	1.06	1	0.15	0.54	0.102	18.2403	145.868	18.2403	145.868
2014	[18072] TAMURA Y.(2014) [GeoReM [7895] ]	samp. HPD1147R12		MARIANA ARC / MARIANA ARC - CENTRAL ISLAND PROVINCE / PAGAN / PAGAN CENTRAL VOLCANIC REGION	VOLCANIC ROCK	BASALT	7	arc	WHOLE ROCK	0.41	2457.33		239.6	9.6	17.5	0.5	1.53	3.82	3.2	1.16	0.48	1.57	1.69	1.12	1.02	0.16	0.56	0.107	18.2299	145.866	18.2299	145.866
2014	[18072] TAMURA Y.(2014) [GeoReM [7895] ]	samp. HPD1147R13		MARIANA ARC / MARIANA ARC - CENTRAL ISLAND PROVINCE / PAGAN / PAGAN CENTRAL VOLCANIC REGION	VOLCANIC ROCK	BASALT	7	arc	WHOLE ROCK	0.41	2457.33		235.4	9.6	17.6	0.2	1.49	3.89	3.04	1.15	0.47	1.53	1.67	1.05	1.02	0.16	0.52	0.114	18.2295	145.865	18.2295	145.865
2014	[18072] TAMURA Y.(2014) [GeoReM [7895] ]	samp. HPD1147R11		MARIANA ARC / MARIANA ARC - CENTRAL ISLAND PROVINCE / PAGAN / PAGAN CENTRAL VOLCANIC REGION	VOLCANIC ROCK	BASALT	7	arc	WHOLE ROCK	0.42	2517.27		245.9	9.7	17.9	0.21	1.45	3.73	3.05	1.08	0.46	1.43	1.57	1.05	0.98	0.16	0.52	0.116	18.2302	145.867	18.2302	145.867
2014	[18072] TAMURA Y.(2014) [GeoReM [7895] ]	samp. HPD1147R14		MARIANA ARC / MARIANA ARC - CENTRAL ISLAND PROVINCE / PAGAN / PAGAN CENTRAL VOLCANIC REGION	VOLCANIC ROCK	BASALT	7	arc	WHOLE ROCK	0.42	2517.27		234.6	10	17.9	0.5	1.52	3.95	3.17	1.1	0.44	1.47	1.62	1.04	1.03	0.15	0.53	0.8	18.2291	145.864	18.2291	145.864
2014	[18072] TAMURA Y.(2014) [GeoReM [7895] ]	samp. HPD1147R16		MARIANA ARC / MARIANA ARC - CENTRAL ISLAND PROVINCE / PAGAN / PAGAN CENTRAL VOLCANIC REGION	VOLCANIC ROCK	BASALT	7	arc	WHOLE ROCK	0.55	3296.42		255.2	12.6	28.5	0.7	3.17	7.29	5.39	1.61	0.63	1.93	2.16	1.34	1.4	0.2	0.8	0.295	18.2244	145.854	18.2244	145.854
2014	[18072] TAMURA Y.(2014) [GeoReM [7895] ]	samp. HPD1147R18		MARIANA ARC / MARIANA ARC - CENTRAL ISLAND PROVINCE / PAGAN / PAGAN CENTRAL VOLCANIC REGION	VOLCANIC ROCK	BASALT	7	arc	WHOLE ROCK	0.55	3296.42		242	13	28.5	0.6	3.13	7.31	5.15	1.57	0.61	2	2.13	1.36	1.38	0.2	0.8	0.28	18.2237	145.852	18.2237	145.852
2014	[18072] TAMURA Y.(2014) [GeoReM [7895] ]	samp. HPD1147R19		MARIANA ARC / MARIANA ARC - CENTRAL ISLAND PROVINCE / PAGAN / PAGAN CENTRAL VOLCANIC REGION	VOLCANIC ROCK	BASALT	7	arc	WHOLE ROCK	0.55	3296.42		263	12.5	29.5	0.6	3.29	7.66	5.3	1.6	0.59	1.97	2.15	1.4	1.34	0.2	0.81	0.305	18.2235	145.851	18.2235	145.851
2014	[18072] TAMURA Y.(2014) [GeoReM [7895] ]	samp. HPD1147R21		MARIANA ARC / MARIANA ARC - CENTRAL ISLAND PROVINCE / PAGAN / PAGAN CENTRAL VOLCANIC REGION	VOLCANIC ROCK	BASALT	7	arc	WHOLE ROCK	0.55	3296.42		268.6	12.7	28.6	0.6	3.2	7.57	5.19	1.55	0.67	1.96	2.23	1.35	1.35	0.21	0.8	0.286	18.2232	145.851	18.2232	145.851
2014	[18072] TAMURA Y.(2014) [GeoReM [7895] ]	samp. HPD1147R07		MARIANA ARC / MARIANA ARC - CENTRAL ISLAND PROVINCE / PAGAN / PAGAN CENTRAL VOLCANIC REGION	VOLCANIC ROCK	BASALT	7	arc	WHOLE ROCK	0.56	3356.35		276.2	11.8	26	0.5	2.51	6.28	4.62	1.55	0.61	1.84	2.09	1.31	1.29	0.2	0.79	0.193	18.2371	145.876	18.2371	145.876
2014	[18072] TAMURA Y.(2014) [GeoReM [7895] ]	samp. HPD1147R15		MARIANA ARC / MARIANA ARC - CENTRAL ISLAND PROVINCE / PAGAN / PAGAN CENTRAL VOLCANIC REGION	VOLCANIC ROCK	BASALT	7	arc	WHOLE ROCK	0.56	3356.35		268.4	12.5	28.5	0.43	3.37	7.55	5.39	1.7	0.69	2.13	2.25	1.42	1.36	0.21	0.86	0.303	18.2248	145.855	18.2248	145.855
2014	[18072] TAMURA Y.(2014) [GeoReM [7895] ]	samp. HPD1147R17		MARIANA ARC / MARIANA ARC - CENTRAL ISLAND PROVINCE / PAGAN / PAGAN CENTRAL VOLCANIC REGION	VOLCANIC ROCK	BASALT	7	arc	WHOLE ROCK	0.56	3356.35		280.8	13.1	29	0.5	3.29	7.66	5.41	1.66	0.63	2.1	2.2	1.4	1.33	0.21	0.83	0.293	18.2239	145.853	18.2239	145.853
2014	[18072] TAMURA Y.(2014) [GeoReM [7895] ]	samp. HPD1147R09		MARIANA ARC / MARIANA ARC - CENTRAL ISLAND PROVINCE / PAGAN / PAGAN CENTRAL VOLCANIC REGION	VOLCANIC ROCK	BASALT	7	arc	WHOLE ROCK	0.57	3416.29		300.5	12.7	27.2	0.38	2.58	6.4	4.82	1.56	0.63	1.88	2.18	1.38	1.38	0.21	0.79	0.7	18.2355	145.874	18.2355	145.874
2014	[18072] TAMURA Y.(2014) [GeoReM [7895] ]	samp. HPD1147R23		MARIANA ARC / MARIANA ARC - CENTRAL ISLAND PROVINCE / PAGAN / PAGAN CENTRAL VOLCANIC REGION	VOLCANIC ROCK	BASALT	7	arc	WHOLE ROCK	0.67	4015.64		275.4	14.3	42.3	1	5.86	12.63	8.24	2.28	0.82	2.52	2.64	1.64	1.56	0.24	1.13	0.9	18.2168	145.844	18.2168	145.844
2005	[8033] WADE J. A. (2005)	samp. AN-8	8459-AN8	MARIANA ARC / MARIANA ARC - CENTRAL ISLAND PROVINCE / ANATAHAN / ANATAHAN / PACIFIC OCEAN	VOLCANIC ROCK	BASALT	7	arc	WHOLE ROCK	0.68	4075.57	32.3	305	16.1	35.3	0.838	4.89	10.4	7.3	2.07	0.769	2.51	2.64	1.6	1.57	0.246	1.02	0.624	16.37	145.63	16.37	145.63
2005	[8033] WADE J. A. (2005)	samp. ANAT3		MARIANA ARC / MARIANA ARC - CENTRAL ISLAND PROVINCE / ANATAHAN / ANATAHAN / PACIFIC OCEAN	VOLCANIC ROCK	BASALT	7	arc	WHOLE ROCK	0.69	4135.51	31.8	266	19.6	49.4	0.94	4.39	9.75	7.39	2.22	0.84	2.91	3.3	2.04	2	0.325	1.39	0.576	16.37	145.63	16.37	145.63
1997	[2374] ELLIOTT T. R. (1997)	samp. PAG2	9704-PAG2	MARIANA ARC / MARIANA ARC - CENTRAL ISLAND PROVINCE / PAGAN / PACIFIC OCEAN	VOLCANIC ROCK	BASALT	7	arc	WHOLE ROCK	0.7	4195.44		291	17.1	41.8	0.69	3.8	9.11	7.04	2.18	0.78	2.71	2.89	1.74	1.74	0.277	1.19	0.389	18.16	145.8	18.16	145.8
2006	[9036] STERN R. J.(2006) [GeoReM [1120] ]	samp. D50-1-2		MARIANA ARC / MARIANA ARC - CENTRAL ISLAND PROVINCE / GUGUAN / PACIFIC OCEAN	VOLCANIC ROCK	BASALT	7	arc	WHOLE ROCK	0.71	4255.38	44	402	15.1	24	0.47	2.6	6.92	4.69	1.5	0.58	2.04	2.27	1.55	1.49	0.24		0.55	17.403	145.863	17.403	145.863
2006	[9036] STERN R. J.(2006) [GeoReM [1120] ]	samp. D50-1-3		MARIANA ARC / MARIANA ARC - CENTRAL ISLAND PROVINCE / GUGUAN / PACIFIC OCEAN	VOLCANIC ROCK	BASALT	7	arc	WHOLE ROCK	0.71	4255.38	45	387	14.1	25	0.47	2.3	6.52	4.25	1.42	0.57	1.99	2.27	1.57	1.58	0.206	0.705	0.41	17.403	145.863	17.403	145.863
2011	[15566] MARSKE J. P.(2011) [GeoReM [6201] ]	samp. TM-06-243		MARIANA ARC / MARIANA ARC - CENTRAL ISLAND PROVINCE / PAGAN / PAGAN CENTRAL VOLCANIC REGION	VOLCANIC ROCK	BASALT	7	arc	WHOLE ROCK	0.72	4315.31	21	302	19.4	59	1.56	7.36	15.4	10.5	2.96	0.99	3.43	3.66	2.19	2.08	0.33	1.47	1.02	18.0888	145.757	18.0888	145.757
2005	[8033] WADE J. A. (2005)	samp. AN-1	8459-AN1	MARIANA ARC / MARIANA ARC - CENTRAL ISLAND PROVINCE / ANATAHAN / ANATAHAN / PACIFIC OCEAN	VOLCANIC ROCK	BASALT	7	arc	WHOLE ROCK	0.73	4375.25	31.7	275	20.6	51.8	1.23	5.69	12.3	8.78	2.52	0.87	3.11	3.42	2.08	2.1	0.329	1.49	0.864	16.37	145.63	16.37	145.63
2011	[15566] MARSKE J. P.(2011) [GeoReM [6201] ]	samp. TM-06-239		MARIANA ARC / MARIANA ARC - CENTRAL ISLAND PROVINCE / PAGAN / PAGAN CENTRAL VOLCANIC REGION	VOLCANIC ROCK	BASALT	7	arc	WHOLE ROCK	0.74	4435.18	22.2	328	17.2	39	1.07	6.16	13	9.06	2.65	0.94	3.12	3.27	1.94	1.8	0.29	0.99	0.74	18.092	145.758	18.092	145.758
1984	[2698] HOLE M. J. (1984)	samp. AG1	8386-AG1	MARIANA ARC / MARIANA ARC - CENTRAL ISLAND PROVINCE / AGRIGAN / AGRIGAN / PACIFIC OCEAN	VOLCANIC ROCK	BASALT	7	arc	WHOLE ROCK	0.75	4495.12		286	20	64	2	7.8	14.9	11	2.9	1.09	2.57			1.94	0.32	1.57	0.99	18.73	145.65	18.73	145.65
2005	[8033] WADE J. A. (2005)	samp. AN-3	8459-AN3	MARIANA ARC / MARIANA ARC - CENTRAL ISLAND PROVINCE / ANATAHAN / ANATAHAN / PACIFIC OCEAN	VOLCANIC ROCK	BASALT	7	arc	WHOLE ROCK	0.75	4495.12	28.1	290	16.5	33.7	0.763	3.66	8.35	6.51	1.97	0.75	2.47	2.76	1.68	1.67	0.266	0.989	0.419	16.37	145.63	16.37	145.63
2011	[15566] MARSKE J. P.(2011) [GeoReM [6201] ]	samp. TM-06-245		MARIANA ARC / MARIANA ARC - CENTRAL ISLAND PROVINCE / PAGAN / PAGAN CENTRAL VOLCANIC REGION	VOLCANIC ROCK	BASALT	7	arc	WHOLE ROCK	0.76	4555.05	22.1	337	17	40	1	5.84	12.4	8.83	2.56	0.94	3	3.2	1.9	1.76	0.28	0.95	0.69	18.0896	145.757	18.0896	145.757
2006	[9036] STERN R. J.(2006) [GeoReM [1120] ]	samp. D48-2-2		MARIANA ARC / MARIANA ARC - CENTRAL ISLAND PROVINCE / GUGUAN / PACIFIC OCEAN	VOLCANIC ROCK	BASALT	7	arc	WHOLE ROCK	0.76	4555.05	34	259	19.6	50	1.51	7.37	16.03	9.83	2.72	0.96	3.29	3.23	2.06	1.88	0.31		0.93	17.275	145.623	17.275	145.623
2011	[15566] MARSKE J. P.(2011) [GeoReM [6201] ]	samp. TM-06-217		MARIANA ARC / MARIANA ARC - CENTRAL ISLAND PROVINCE / PAGAN / PAGAN CENTRAL VOLCANIC REGION	VOLCANIC ROCK	BASALT	7	arc	WHOLE ROCK	0.77	4614.99	33.7	353	13.4	32	0.69	4.27	9.18	6.93	2.12	0.83	2.6	2.8	1.61	1.43	0.23	0.78	0.45	18.094	145.749	18.094	145.749
2014	[18072] TAMURA Y.(2014) [GeoReM [7895] ]	samp. HPD1148R01		MARIANA ARC / MARIANA ARC - CENTRAL ISLAND PROVINCE / PAGAN / PAGAN CENTRAL VOLCANIC REGION	VOLCANIC ROCK	BASALT	7	arc	WHOLE ROCK	0.77	4614.99		345	16.1	43.3	1	7.46	15.3	9.83	2.64	1	3.1	2.92	1.69	1.51	0.22	1.07	0.8	17.9831	145.642	17.9831	145.642
2014	[18072] TAMURA Y.(2014) [GeoReM [7895] ]	samp. HPD1148R06		MARIANA ARC / MARIANA ARC - CENTRAL ISLAND PROVINCE / PAGAN / PAGAN CENTRAL VOLCANIC REGION	VOLCANIC ROCK	BASALT	7	arc	WHOLE ROCK	0.77	4614.99		330.1	15.4	43.8	0.9	6.95	15.08	10.15	2.82	1.02	3.19	2.99	1.74	1.63	0.25	1.23	0.625	17.9855	145.642	17.9855	145.642
2006	[9036] STERN R. J.(2006) [GeoReM [1120] ]	samp. D48-3-2		MARIANA ARC / MARIANA ARC - CENTRAL ISLAND PROVINCE / GUGUAN / PACIFIC OCEAN	VOLCANIC ROCK	BASALT	7	arc	WHOLE ROCK	0.77	4614.99	35	248	19.2	50	1.44	7.13	15.27	9.35	2.6	0.92	3.2	3.15	2	1.85	0.31		0.89	17.275	145.623	17.275	145.623
2006	[9036] STERN R. J.(2006) [GeoReM [1120] ]	samp. D48-3-3		MARIANA ARC / MARIANA ARC - CENTRAL ISLAND PROVINCE / GUGUAN / PACIFIC OCEAN	VOLCANIC ROCK	BASALT	7	arc	WHOLE ROCK	0.77	4614.99	34	268	17.2	49	1.43	6.5	14.6	8.56	2.35	0.83	2.85	2.85	1.87	1.86	0.28	1.49	0.98	17.275	145.623	17.275	145.623
2006	[9036] STERN R. J.(2006) [GeoReM [1120] ]	samp. D48-4-1		MARIANA ARC / MARIANA ARC - CENTRAL ISLAND PROVINCE / GUGUAN / PACIFIC OCEAN	VOLCANIC ROCK	BASALT	7	arc	WHOLE ROCK	0.77	4614.99	34	262	19.3	54	1.62	7.39	15.15	10.3	2.8	0.89	3.07	3.35	2.09	1.97	0.3		0.85	17.275	145.623	17.275	145.623
2006	[9036] STERN R. J.(2006) [GeoReM [1120] ]	samp. D46-1-2		MARIANA ARC / MARIANA ARC - CENTRAL ISLAND PROVINCE / GUGUAN / PACIFIC OCEAN	VOLCANIC ROCK	BASALT	7	arc	WHOLE ROCK	0.78	4674.92	35	235	21.8	46	1.56	7.63	16.59	11.19	3.23	1	3.07	3.4	1.99	1.82	0.25	1.4	0.58	17.205	145.583	17.205	145.583
2006	[9036] STERN R. J.(2006) [GeoReM [1120] ]	samp. D48-1-1		MARIANA ARC / MARIANA ARC - CENTRAL ISLAND PROVINCE / GUGUAN / PACIFIC OCEAN	VOLCANIC ROCK	BASALT	7	arc	WHOLE ROCK	0.78	4674.92	36	260	21.4	51	1.57	8.19	20.95	10.88	3.01	0.95	2.83	3.2	1.96	1.89	0.273	1.38	0.85	17.275	145.623	17.275	145.623
2006	[9036] STERN R. J.(2006) [GeoReM [1120] ]	samp. D48-1-2		MARIANA ARC / MARIANA ARC - CENTRAL ISLAND PROVINCE / GUGUAN / PACIFIC OCEAN	VOLCANIC ROCK	BASALT	7	arc	WHOLE ROCK	0.78	4674.92	35	256	17.3	44	1.43	6.48	13.25	9.06	2.52	0.79	2.74	2.99	1.83	1.71	0.26		0.77	17.275	145.623	17.275	145.623
2006	[9036] STERN R. J.(2006) [GeoReM [1120] ]	samp. D48-1-3	41047-D48-1-3	MARIANA ARC / MARIANA ARC - CENTRAL ISLAND PROVINCE / GUGUAN / PACIFIC OCEAN	VOLCANIC ROCK	BASALT	7	arc	WHOLE ROCK	0.78	4674.92	35	247	19.5	41	1.28	7.19	15.53	9.55	2.68	0.94	3.18	3.23	2.03	1.93	0.31		0.69	17.275	145.623	17.275	145.623
2006	[9036] STERN R. J.(2006) [GeoReM [1120] ]	samp. D48-2-1		MARIANA ARC / MARIANA ARC - CENTRAL ISLAND PROVINCE / GUGUAN / PACIFIC OCEAN	VOLCANIC ROCK	BASALT	7	arc	WHOLE ROCK	0.78	4674.92	35	243	18.7	45	1.41	6.92	14.98	9.18	2.52	0.89	3.06	3	1.91	1.83	0.3		0.74	17.275	145.623	17.275	145.623
2006	[9036] STERN R. J.(2006) [GeoReM [1120] ]	samp. D48-3-1		MARIANA ARC / MARIANA ARC - CENTRAL ISLAND PROVINCE / GUGUAN / PACIFIC OCEAN	VOLCANIC ROCK	BASALT	7	arc	WHOLE ROCK	0.78	4674.92	36	261	20.1	52	1.52	7.6	16.49	10.25	2.79	0.99	3.46	3.37	2.16	2.02	0.33		0.96	17.275	145.623	17.275	145.623
2014	[18072] TAMURA Y.(2014) [GeoReM [7895] ]	samp. HPD1148R04		MARIANA ARC / MARIANA ARC - CENTRAL ISLAND PROVINCE / PAGAN / PAGAN CENTRAL VOLCANIC REGION	VOLCANIC ROCK	BASALT	7	arc	WHOLE ROCK	0.79	4734.86		344.2	16.1	44.1	1.1	6.76	14.35	9.53	2.77	0.94	2.99	2.99	1.69	1.51	0.24	1.16	0.583	17.984	145.642	17.984	145.642
2014	[18072] TAMURA Y.(2014) [GeoReM [7895] ]	samp. HPD1148R05		MARIANA ARC / MARIANA ARC - CENTRAL ISLAND PROVINCE / PAGAN / PAGAN CENTRAL VOLCANIC REGION	VOLCANIC ROCK	BASALT	7	arc	WHOLE ROCK	0.79	4734.86		318.7	15.8	45.5	1.2	7.38	15.46	10.5	2.97	1.06	3.27	3.19	1.82	1.68	0.26	1.25	0.616	17.9848	145.642	17.9848	145.642
1984	[2698] HOLE M. J. (1984)	samp. GUG2		MARIANA ARC / MARIANA ARC - CENTRAL ISLAND PROVINCE / GUGUAN / PACIFIC OCEAN	VOLCANIC ROCK	BASALT	7	arc	WHOLE ROCK	0.79	4734.86		298	21	54	1	3	7	6.7	2.33	0.89	2.45			2.09	0.36	1.41	0.34	17.33	145.85	17.33	145.85
2006	[9036] STERN R. J.(2006) [GeoReM [1120] ]	samp. D46-1-1		MARIANA ARC / MARIANA ARC - CENTRAL ISLAND PROVINCE / GUGUAN / PACIFIC OCEAN	VOLCANIC ROCK	BASALT	7	arc	WHOLE ROCK	0.79	4734.86	34	228	18.3	53	1.85	6.43	14.33	9.26	2.61	0.91	3.13	3.09	1.93	1.81	0.25	1.44	0.68	17.205	145.583	17.205	145.583
2011	[15566] MARSKE J. P.(2011) [GeoReM [6201] ]	samp. TM-06-216		MARIANA ARC / MARIANA ARC - CENTRAL ISLAND PROVINCE / PAGAN / PAGAN CENTRAL VOLCANIC REGION	VOLCANIC ROCK	BASALT	7	arc	WHOLE ROCK	0.8	4794.79	27.2	324	20.2	41	1.03	5.87	12.9	9.5	2.86	1.02	3.41	3.7	2.17	2.01	0.32	1.08	0.69	18.0975	145.755	18.0975	145.755
2011	[15566] MARSKE J. P.(2011) [GeoReM [6201] ]	samp. TM-06-237		MARIANA ARC / MARIANA ARC - CENTRAL ISLAND PROVINCE / PAGAN / PAGAN CENTRAL VOLCANIC REGION	VOLCANIC ROCK	BASALT	7	arc	WHOLE ROCK	0.8	4794.79	28.5	351	18.2	41	0.99	5.91	12.8	9.28	2.73	0.97	3.23	3.48	2.05	1.88	0.3	1.03	0.69	18.0951	145.76	18.0951	145.76
2014	[18072] TAMURA Y.(2014) [GeoReM [7895] ]	samp. HPD1148R08		MARIANA ARC / MARIANA ARC - CENTRAL ISLAND PROVINCE / PAGAN / PAGAN CENTRAL VOLCANIC REGION	VOLCANIC ROCK	BASALT	7	arc	WHOLE ROCK	0.81	4854.73		291.1	20.8	79.2	1.6	8.66	18.65	12.41	3.44	1.1	3.8	3.87	2.48	2.34	0.36	2.2	1.5	17.9836	145.642	17.9836	145.642
2014	[18072] TAMURA Y.(2014) [GeoReM [7895] ]	samp. HPD1148R10		MARIANA ARC / MARIANA ARC - CENTRAL ISLAND PROVINCE / PAGAN / PAGAN CENTRAL VOLCANIC REGION	VOLCANIC ROCK	BASALT	7	arc	WHOLE ROCK	0.81	4854.73		292.7	21.1	81	1.7	8.77	18.41	12.1	3.26	1.09	3.96	3.83	2.36	2.34	0.35	2.18	1.6	17.9851	145.641	17.9851	145.641
2014	[18072] TAMURA Y.(2014) [GeoReM [7895] ]	samp. HPD1148R17		MARIANA ARC / MARIANA ARC - CENTRAL ISLAND PROVINCE / PAGAN / PAGAN CENTRAL VOLCANIC REGION	VOLCANIC ROCK	BASALT	7	arc	WHOLE ROCK	0.81	4854.73		271.6	21.4	81.2	1.6	8.34	18.89	12.23	3.44	1.1	3.8	3.99	2.52	2.4	0.39	2.35	1.1	17.9933	145.633	17.9933	145.633
1997	[2374] ELLIOTT T. R. (1997)	samp. GUG13	9699-GUG-13	MARIANA ARC / MARIANA ARC - CENTRAL ISLAND PROVINCE / GUGUAN / PACIFIC OCEAN	VOLCANIC ROCK	BASALT	7	arc	WHOLE ROCK	0.81	4854.73		265	21.6	53.4	0.67	2.75	7.53	6.59	2.21	0.83	2.96	3.51	2.17	2.22	0.358	1.55	0.252	17.32	145.84	17.32	145.84
2006	[9036] STERN R. J.(2006) [GeoReM [1120] ]	samp. D46-1-5	41048-D46-1-5	MARIANA ARC / MARIANA ARC - CENTRAL ISLAND PROVINCE / GUGUAN / PACIFIC OCEAN	VOLCANIC ROCK	BASALT	7	arc	WHOLE ROCK	0.81	4854.73	36	239	20.1	52	1.73	6.94	15.73	10.05	2.86	0.89	2.61	2.94	1.76	1.61	0.22		0.59	17.205	145.583	17.205	145.583
2014	[18072] TAMURA Y.(2014) [GeoReM [7895] ]	samp. HPD1148R07		MARIANA ARC / MARIANA ARC - CENTRAL ISLAND PROVINCE / PAGAN / PAGAN CENTRAL VOLCANIC REGION	VOLCANIC ROCK	BASALT	7	arc	WHOLE ROCK	0.82	4914.66		255.5	21.5	79.8	1.8	8.29	17.96	12.09	3.34	1.11	3.81	4.02	2.45	2.42	0.38	2.27	1	17.9942	145.642	17.9942	145.642
2014	[18072] TAMURA Y.(2014) [GeoReM [7895] ]	samp. HPD1148R09		MARIANA ARC / MARIANA ARC - CENTRAL ISLAND PROVINCE / PAGAN / PAGAN CENTRAL VOLCANIC REGION	VOLCANIC ROCK	BASALT	7	arc	WHOLE ROCK	0.82	4914.66		286	20.9	80.1	1.6	8.54	18.51	11.83	3.35	1.07	3.95	3.85	2.37	2.28	0.35	2.16	1.055	17.9842	145.641	17.9842	145.641
2014	[18072] TAMURA Y.(2014) [GeoReM [7895] ]	samp. HPD1148R11		MARIANA ARC / MARIANA ARC - CENTRAL ISLAND PROVINCE / PAGAN / PAGAN CENTRAL VOLCANIC REGION	VOLCANIC ROCK	BASALT	7	arc	WHOLE ROCK	0.82	4914.66		274	21	80.6	1.8	8.62	19.06	12.47	3.38	1.11	3.74	3.99	2.38	2.38	0.37	2.25	0.9	17.9853	145.642	17.9853	145.642
2014	[18072] TAMURA Y.(2014) [GeoReM [7895] ]	samp. HPD1148R12		MARIANA ARC / MARIANA ARC - CENTRAL ISLAND PROVINCE / PAGAN / PAGAN CENTRAL VOLCANIC REGION	VOLCANIC ROCK	BASALT	7	arc	WHOLE ROCK	0.82	4914.66		282.1	21.1	81.1	1.4	8.52	18.36	12.12	3.47	1.06	3.71	3.76	2.41	2.3	0.34	2.16	1.1	17.9859	145.641	17.9859	145.641
1997	[2374] ELLIOTT T. R. (1997)	samp. GUG6	8458-GUG6	MARIANA ARC / MARIANA ARC - CENTRAL ISLAND PROVINCE / GUGUAN / PACIFIC OCEAN	VOLCANIC ROCK	BASALT	7	arc	WHOLE ROCK	0.82	4914.66		283	20.9	53	0.78	3.14	8.23	7.02	2.25	0.85	2.91	3.38	2.13	2.18	0.345	1.52	0.276	17.33	145.85	17.33	145.85
1997	[2374] ELLIOTT T. R. (1997)	samp. GUG9	8458-GUG 9	MARIANA ARC / MARIANA ARC - CENTRAL ISLAND PROVINCE / GUGUAN / PACIFIC OCEAN	VOLCANIC ROCK	BASALT	7	arc	WHOLE ROCK	0.82	4914.66		227	20.1	50.4	0.73	2.85	7.63	6.57	2.14	0.81	2.86	3.29	2.11	2.07	0.331	1.42	0.266	17.33	145.85	17.33	145.85
2011	[15566] MARSKE J. P.(2011) [GeoReM [6201] ]	samp. TM-06-236		MARIANA ARC / MARIANA ARC - CENTRAL ISLAND PROVINCE / PAGAN / PAGAN CENTRAL VOLCANIC REGION	VOLCANIC ROCK	BASALT	7	arc	WHOLE ROCK	0.83	4974.6	27.1	362	18.8	40	0.97	6.14	13	9.38	2.71	0.98	3.15	3.34	1.97	1.79	0.29	0.96	0.73	18.092	145.758	18.092	145.758
2014	[18072] TAMURA Y.(2014) [GeoReM [7895] ]	samp. HPD1147R22		MARIANA ARC / MARIANA ARC - CENTRAL ISLAND PROVINCE / PAGAN / PAGAN CENTRAL VOLCANIC REGION	VOLCANIC ROCK	BASALT	7	arc	WHOLE ROCK	0.83	4974.6		313.3	16.8	50.4	1.2	5.63	13.21	9.12	2.61	0.98	3.28	3.29	2.05	1.96	0.3	1.5	0.512	18.2171	145.846	18.2171	145.846
2006	[9036] STERN R. J.(2006) [GeoReM [1120] ]	samp. D49-1-1		MARIANA ARC / MARIANA ARC - CENTRAL ISLAND PROVINCE / GUGUAN / PACIFIC OCEAN	VOLCANIC ROCK	BASALT	7	arc	WHOLE ROCK	0.85	5094.47	40	289	18.7	52	1.3	4.56	11.31	7.62	2.37	0.85	3.01	3.15	2.05	1.91	0.299	1.49	0.57	17.253	145.702	17.253	145.702
1997	[2374] ELLIOTT T. R. (1997)	samp. GUG3	9699-GUG3	MARIANA ARC / MARIANA ARC - CENTRAL ISLAND PROVINCE / GUGUAN / PACIFIC OCEAN	VOLCANIC ROCK	BASALT	7	arc	WHOLE ROCK	0.86	5154.4		279	23	66.3	1.24	7.4	15.86	11.11	3.08	1.08	3.65	3.81	2.3	2.29	0.356	1.78	0.737	17.32	145.84	17.32	145.84
2006	[9036] STERN R. J.(2006) [GeoReM [1120] ]	samp. D49-1-2		MARIANA ARC / MARIANA ARC - CENTRAL ISLAND PROVINCE / GUGUAN / PACIFIC OCEAN	VOLCANIC ROCK	BASALT	7	arc	WHOLE ROCK	0.86	5154.4	39	267	20.4	52	1.32	4.78	10.94	8.57	2.59	0.84	2.92	3.49	2.2	2.08	0.32		0.5	17.253	145.702	17.253	145.702
2006	[9036] STERN R. J.(2006) [GeoReM [1120] ]	samp. D49-1-3		MARIANA ARC / MARIANA ARC - CENTRAL ISLAND PROVINCE / GUGUAN / PACIFIC OCEAN	VOLCANIC ROCK	BASALT	7	arc	WHOLE ROCK	0.87	5214.34	40	268	20.6	51	1.31	4.95	11.52	8	2.44	0.89	3.13	3.29	2.11	1.96	0.32		0.58	17.253	145.702	17.253	145.702
1997	[2374] ELLIOTT T. R. (1997)	samp. PAG3	9705-PAG3	MARIANA ARC / MARIANA ARC - CENTRAL ISLAND PROVINCE / PAGAN / PACIFIC OCEAN	VOLCANIC ROCK	BASALT	7	arc	WHOLE ROCK	0.93	5573.94		373	23.2	60.8	0.96	5.18	12.45	9.57	2.95	1.01	3.69	3.93	2.4	2.36	0.369	1.8	0.547	18.16	145.79	18.16	145.79
Download from GEOROC - Geochemical Database
Date of Query: Monday	October 30	2017
Please note: There is a List of your Query Criteria at the End of this Sheet.
Complete references (see 'CITATION' column above) - note that serial numbers [#####] correspond to record numbers from the GEOROC database
[15566] MARSKE J. P., PIETRUSZKA A. J., TRUSDELL F. A., GARCIA M. O. ; GEOCHEMISTRY OF SOUTHERN PAGAN ISLAND LAVAS, MARIANA ARC: THE ROLE OF SUBDUCTION ZONE PROCESSES ; CONTRIB. MINERAL. PETROL. 162 [2011] 231-252
[18072] TAMURA Y., ISHIZUKA O., STERN R. J., NICHOLS A. R. L., KAWABATA H., HIRAHARA Y., CHANG QING, MIYAZAKI A., KIMURA J.-I., EMBLEY R. W., TATSUMI Y. ; MISSION IMMISCIBLE: DISTINCT SUBDUCTION COMPONENTS GENERATE TWO PRIMARY MAGMAS AT PAGAN VOLCANO, MARIANA ARC ; J. PETROL. 55 [2014] 63-101
[19118] BROUNCE M., KELLEY KATHERINE A., COTTRELL E. ; VARIATIONS IN FE3+ /FE(T) OF MARIANA ARC BASALTS AND MANTLE WEDGE FO2 ; J. PETROL. 55 [2014] 2513-VARIATIONS IN FE3+ /FE(T) OF MARIANA ARC BASALTS AND MANTLE WEDGE FO2
[2375] STRAUB S. M. ; MULTIPLE SOURCES OF QUATERNARY TEPHRA LAYERS IN THE MARIANA TROUGH ; J. VOLCANOL. GEOTHERM. RES. 76 [1997] 251-276
[2430] HAWKINS J. W. JR., LONSDALE P. F., MACDOUGALL J. D., VOLPE A. M. ; PETROLOGY OF THE AXIAL RIDGE OF THE MARIANA TROUGH BACKARC SPREADING CENTER ; EARTH PLANET. SCI. LETT. 100 [1990] 226-250
[2698] HOLE M. J., SAUNDERS A. D., MARRINER G. F., TARNEY J. ; SUBDUCTION OF PELAGIC SEDIMENTS: IMPLICATIONS FOR THE ORIGIN OF CE-ANOMALOUS BASALTS FROM THE MARIANA ISLANDS ; J. GEOL. SOC. LONDON 141 [1984] 453-472
[3178] STRAUB S. M. ; CONTRASTING COMPOSITIONS OF MARIANA TROUGH FALLOUT TEPHRA AND MARIANA ISLAND ARC VOLCANICS: A FRACTIONAL CRYSTALLIZATION LINK ; BULL. VOLCANOL. 57 [1995] 403-421
[5803] PEARCE J. A., KEMPTON P. D., NOWELL G. M., NOBLE S. R. ; HF-ND ELEMENT AND ISOTOPE PERSPECTIVE ON THE NATURE AND PROVENANCE OF MANTLE AND SUBDUCTION COMPONENTS IN WESTERN PACIFIC ARC-BASIN SYSTEMS ; J. PETROL. 40 [1999] 1579-1611
[8033] WADE J. A., PLANK T., STERN R. J., TOLLSTRUP D. L., GILL J. B., O^LEARY J. C., EILER J. M., MOORE RICHARD B., WOODHEAD J. D., TRUSDELL F. A., FISCHER T. P., HILTON D. R. ; THE MAY 2003 ERUPTION OF ANATAHAN VOLCANO, MARIANA ISLANDS: GEOCHEMICAL EVOLUTION OF A SILICIC ISLAND-ARC VOLCANO ; J. VOLCANOL. GEOTHERM. RES. 146 [2005] 139-170
[8514] PEARCE J. A., STERN R. J., BLOOMER S. H., FRYER P. B. ; GEOCHEMICAL MAPPING OF THE MARIANA ARC-BASIN SYSTEM: IMPLICATIONS FOR THE NATURE AND DISTRIBUTION OF SUBDUCTION COMPONENTS ; GEOCHEMISTRY GEOPHYSICS GEOSYSTEMS 6 [2005]
[9036] STERN R. J., KOHUT E. J., BLOOMER S. H., LEYBOURNE M. I., FOUCH M., VERVOORT J. ; SUBDUCTION FACTORY PROCESSES BENEATH THE GUGUAN CROSS-CHAIN, MARIANA ARC: NO ROLE FOR SEDIMENTS, ARE SERPENTINITES IMPORTANT? ; CONTRIB. MINERAL. PETROL. 151 [2006] 202-221
Criteria:
QUERY
BY
GEOLOGICAL
SETTING:
CONVERGENT
MARGIN
-
MARIANA
ARC
-
MARIANA
ARC
-
CENTRAL
ISLAND
PROVINCE,
MARIANA
ARC
-
SOUTHERN
SEAMOUNT
PROVINCE,
MARIANA
TROUGH,
WEST
MARIANA
BASIN,
WEST
MARIANA
RIDGE
-
NO
FURTHER
CONSTRAINTS
-
SAMPLE
CRITERIA
(COMBINED
WITH
AND):
-
ROCK
NAME:
ANDESITE
/
ANDESITE,
BASALTIC
/
ANDESITE,
CALC-ALKALINE
/
BASALT
/
BASALT,
ANDESITIC
/
BASALT,
THOLEIITIC
/
BASALT,
TRANSITIONAL
/
THOLEIITE
/
THOLEIITE,
OLIVINE

## Sheet: Lau Basin
Year	CITATION	SAMPLE NAME	UNIQUE_ID	LOCATION	ROCK TYPE	ROCK NAME	TYPE OF MATERIAL	kcode	setting	TiO2	Ti	Sc	V	Y	Nb	La	Ce	Gd	Er	Yb	Th	LATITUDE (MIN.)	LONGITUDE (MIN.)	LATITUDE (MAX.)	LONGITUDE (MAX.)
2001	[4279] PEATE D. W. (2001)	samp. 20-5-2	26945-20-5-2	TONGA ARC / LAU BASIN / CENTRAL LAU SPREADING CENTER / PACIFIC OCEAN	VOLCANIC ROCK	ANDESITE	VOLCANIC GLASS	1	basin			41.7	373	28.3	0.88	1.42	4.82	3.28	2.89	2.97	0.072	-19.4883	-175.963	-19.4883	-175.963
2001	[4279] PEATE D. W. (2001)	samp. 22-6-1	13116-22-6-1	TONGA ARC / LAU BASIN / CENTRAL LAU SPREADING CENTER / PACIFIC OCEAN	VOLCANIC ROCK	ANDESITE	VOLCANIC GLASS	1	basin			43.9	388	32.7	1.72	2.15	6.82	4.03	3.27	3.29	0.137	-19.6883	-175.993	-19.6883	-175.993
2001	[4279] PEATE D. W. (2001)	samp. 12-5-2		TONGA ARC / LAU BASIN / CENTRAL LAU SPREADING CENTER / PACIFIC OCEAN	VOLCANIC ROCK	ANDESITE	VOLCANIC GLASS	1	basin			29.1	228	132	6.39	12.6	40	17.06	13.33	13.53	0.966	-18.922	-176.553	-18.922	-176.553
2011	[15742] TIAN LIYAN (2011)	samp. 22-1		TONGA ARC / LAU BASIN / MANGATOLU TRIPLE JUNCTION / PACIFIC OCEAN	VOLCANIC ROCK	ANDESITE	VOLCANIC GLASS	1	basin					72.2	8.32	12.8	33.8		7.26	6.83	0.9	-15.342	-174.612	-15.342	-174.612
2011	[15742] TIAN LIYAN (2011)	samp. 9-1		TONGA ARC / LAU BASIN / MANGATOLU TRIPLE JUNCTION / PACIFIC OCEAN	VOLCANIC ROCK	ANDESITE	VOLCANIC GLASS	1	basin					92.5	11.5	18.9	47.6		7.18	6.24	1.13	-15.41	-174.69	-15.41	-174.69
2011	[15742] TIAN LIYAN (2011)	samp. 20-7		TONGA ARC / LAU BASIN / MANGATOLU TRIPLE JUNCTION / PACIFIC OCEAN	VOLCANIC ROCK	ANDESITE	VOLCANIC GLASS	1	basin					95.9	11.8	19.7	50.7		9.76	9.63	1.54	-15.44	-174.685	-15.44	-174.685
2011	[15742] TIAN LIYAN (2011)	samp. 20-1		TONGA ARC / LAU BASIN / MANGATOLU TRIPLE JUNCTION / PACIFIC OCEAN	VOLCANIC ROCK	ANDESITE	VOLCANIC GLASS	1	basin					97	12.5	19.9	49.6		10.2	9.72	1.61	-15.44	-174.685	-15.44	-174.685
2001	[4279] PEATE D. W. (2001)	samp. 55GC		TONGA ARC / LAU BASIN / VALU FA RIDGE / PACIFIC OCEAN	VOLCANIC ROCK	ANDESITE	VOLCANIC GLASS	1	basin			29.5	312	34.7	1.17	4.13	11.71	4.82	3.52	3.48	0.335	-21.479	-176.38	-21.479	-176.38
2001	[4279] PEATE D. W. (2001)	samp. 92KD1		TONGA ARC / LAU BASIN / VALU FA RIDGE / PACIFIC OCEAN	VOLCANIC ROCK	ANDESITE	VOLCANIC GLASS	1	basin			33.4	379	33.4	0.91	3.93	10.76	4.46	3.3	3.3	0.355	-22.374	-176.673	-22.374	-176.673
2001	[4279] PEATE D. W. (2001)	samp. L-2-5		TONGA ARC / LAU BASIN / VALU FA RIDGE / PACIFIC OCEAN	VOLCANIC ROCK	ANDESITE	VOLCANIC GLASS	1	basin			35	483	33.9	0.95	3.91	10.9	4.52	3.39	3.45	0.363	-22.331	-176.656	-22.331	-176.656
2001	[4279] PEATE D. W. (2001)	samp. L-1-11		TONGA ARC / LAU BASIN / VALU FA RIDGE / PACIFIC OCEAN	VOLCANIC ROCK	ANDESITE	VOLCANIC GLASS	1	basin			30.8	421	36.7	1.11	4.38	12.2	4.91	3.75	3.77	0.417	-22.315	-176.65	-22.315	-176.65
2001	[4279] PEATE D. W. (2001)	samp. 90KD1		TONGA ARC / LAU BASIN / VALU FA RIDGE / PACIFIC OCEAN	VOLCANIC ROCK	ANDESITE	VOLCANIC GLASS	1	basin			30.8	259	37.6	1.14	4.68	12.73	5.16	3.81	3.8	0.432	-22.325	-176.656	-22.325	-176.656
2006	[9804] FRETZDORFF S. (2006)	samp. 77 OFOS-GL		TONGA ARC / LAU BASIN / VALU FA RIDGE / PACIFIC OCEAN	VOLCANIC ROCK	ANDESITE	VOLCANIC GLASS	1	basin	1.39	8330.95	19.9		40	1.19	5.68	15.7	5.86	4.36	4.4	0.541	-22.857	-176.74	-22.857	-176.74
2006	[9804] FRETZDORFF S. (2006)	samp. 47DR-1GL		TONGA ARC / LAU BASIN / VALU FA RIDGE / PACIFIC OCEAN	VOLCANIC ROCK	ANDESITE	VOLCANIC GLASS	1	basin	1.44	8630.62	20.9		41.2	1.23	5.82	16.1	6.01	4.48	4.48	0.556	-22.217	-176.61	-22.217	-176.61
2006	[9804] FRETZDORFF S. (2006)	samp. 45GTV-3GL		TONGA ARC / LAU BASIN / VALU FA RIDGE / PACIFIC OCEAN	VOLCANIC ROCK	ANDESITE	VOLCANIC GLASS	1	basin	1.59	9529.65	21.4		41.6	1.24	5.84	16.2	5.99	4.5	4.49	0.548	-22.215	-176.608	-22.215	-176.608
2001	[4279] PEATE D. W. (2001)	samp. 11-2-1	26958-11-2-1	TONGA ARC / LAU BASIN / CENTRAL LAU SPREADING CENTER / PACIFIC OCEAN	VOLCANIC ROCK	ANDESITE, BASALTIC	VOLCANIC GLASS	2	basin			46.5	652	71.9	3.09	4.59	15.4	9.04	7.27	7.24	0.244	-19.115	-176.553	-19.115	-176.553
2001	[4279] PEATE D. W. (2001)	samp. 10-1-3	13111-10-1-3	TONGA ARC / LAU BASIN / CENTRAL LAU SPREADING CENTER / PACIFIC OCEAN	VOLCANIC ROCK	ANDESITE, BASALTIC	VOLCANIC GLASS	2	basin			35.7	291	116	5.84	8.85	29.3	14.9	11.63	11.58	0.509	-19.1412	-176.528	-19.1412	-176.528
2011	[15742] TIAN LIYAN (2011)	samp. 45-2		TONGA ARC / LAU BASIN / MANGATOLU TRIPLE JUNCTION / PACIFIC OCEAN	VOLCANIC ROCK	ANDESITE, BASALTIC	VOLCANIC GLASS	2	basin					43.5	4.17	6.61	18.4		3.79	3.51	0.6	-15.612	-174.808	-15.612	-174.808
2011	[15742] TIAN LIYAN (2011)	samp. 3-1		TONGA ARC / LAU BASIN / MANGATOLU TRIPLE JUNCTION / PACIFIC OCEAN	VOLCANIC ROCK	ANDESITE, BASALTIC	VOLCANIC GLASS	2	basin					71.1	6.71	11.5	31.9		7.33	6.59	0.8	-15.387	-174.678	-15.387	-174.678
2011	[15742] TIAN LIYAN (2011)	samp. 21-3		TONGA ARC / LAU BASIN / MANGATOLU TRIPLE JUNCTION / PACIFIC OCEAN	VOLCANIC ROCK	ANDESITE, BASALTIC	VOLCANIC GLASS	2	basin					62.4	8.56	13.1	32.7		6.5	5.86	0.81	-15.375	-174.56	-15.375	-174.56
2011	[15742] TIAN LIYAN (2011)	samp. 9-3		TONGA ARC / LAU BASIN / MANGATOLU TRIPLE JUNCTION / PACIFIC OCEAN	VOLCANIC ROCK	ANDESITE, BASALTIC	VOLCANIC GLASS	2	basin					73.1	12.6	17.9	44.5		8.95	7.52	1.64	-15.41	-174.69	-15.41	-174.69
2001	[4279] PEATE D. W. (2001)	samp. 61GC		TONGA ARC / LAU BASIN / VALU FA RIDGE / PACIFIC OCEAN	VOLCANIC ROCK	ANDESITE, BASALTIC	VOLCANIC GLASS	2	basin			37.8	260	17.4	0.47	2.07	5.46	2.31	1.76	1.74	0.196	-21.822	-176.442	-21.822	-176.442
2001	[4279] PEATE D. W. (2001)	samp. 133GA		TONGA ARC / LAU BASIN / VALU FA RIDGE / PACIFIC OCEAN	VOLCANIC ROCK	ANDESITE, BASALTIC	VOLCANIC GLASS	2	basin			23.2	149	38.1	1.1	4.84	13.42	5.27	3.81	3.87	0.439	-22.178	-176.617	-22.178	-176.617
2006	[9804] FRETZDORFF S. (2006)	samp. 79 DR-1GL		TONGA ARC / LAU BASIN / VALU FA RIDGE / PACIFIC OCEAN	VOLCANIC ROCK	ANDESITE, BASALTIC	VOLCANIC GLASS	2	basin	0.79	4734.86	36.8		16.1	0.253	1.99	5.16	2.22	1.79	1.84	0.272	-22.837	-176.785	-22.837	-176.785
2006	[9804] FRETZDORFF S. (2006)	samp. 74 DR-1GL		TONGA ARC / LAU BASIN / VALU FA RIDGE / PACIFIC OCEAN	VOLCANIC ROCK	ANDESITE, BASALTIC	VOLCANIC GLASS	2	basin	0.92	5514.01	34.4		16.7	0.424	3.25	7.95	2.56	1.86	1.87	0.429	-22.668	-176.727	-22.668	-176.727
2006	[9804] FRETZDORFF S. (2006)	samp. 67 DR-1GL		TONGA ARC / LAU BASIN / VALU FA RIDGE / PACIFIC OCEAN	VOLCANIC ROCK	ANDESITE, BASALTIC	VOLCANIC GLASS	2	basin	1.49	8930.3	31.6		27.1	0.607	3.24	8.63	3.74	2.98	3.02	0.369	-22.607	-176.732	-22.607	-176.732
2006	[9804] FRETZDORFF S. (2006)	samp. 60 GTV-1GL		TONGA ARC / LAU BASIN / VALU FA RIDGE / PACIFIC OCEAN	VOLCANIC ROCK	ANDESITE, BASALTIC	VOLCANIC GLASS	2	basin	1.7	10188.9	30.4		28.9	0.826	3.8	10.4	4.08	3.16	3.2	0.356	-22.54	-176.717	-22.54	-176.717
2006	[9804] FRETZDORFF S. (2006)	samp. 66 GTV-2GL		TONGA ARC / LAU BASIN / VALU FA RIDGE / PACIFIC OCEAN	VOLCANIC ROCK	ANDESITE, BASALTIC	VOLCANIC GLASS	2	basin	1.81	10848.2	31.3		29.9	0.861	3.92	10.8	4.28	3.26	3.26	0.366	-22.537	-176.705	-22.537	-176.705
2006	[9804] FRETZDORFF S. (2006)	samp. 71 DR-1GL		TONGA ARC / LAU BASIN / VALU FA RIDGE / PACIFIC OCEAN	VOLCANIC ROCK	ANDESITE, BASALTIC	VOLCANIC GLASS	2	basin	1.97	11807.2	29.8		30.1	0.865	3.99	11	4.34	3.3	3.3	0.375	-22.532	-176.72	-22.532	-176.72
2006	[9804] FRETZDORFF S. (2006)	samp. 69 DR-1GL		TONGA ARC / LAU BASIN / VALU FA RIDGE / PACIFIC OCEAN	VOLCANIC ROCK	ANDESITE, BASALTIC	VOLCANIC GLASS	2	basin	1.99	11927	29.8		30.1	0.862	3.97	11	4.32	3.28	3.29	0.371	-22.533	-176.717	-22.533	-176.717
2006	[9804] FRETZDORFF S. (2006)	samp. 70 DR-1GL		TONGA ARC / LAU BASIN / VALU FA RIDGE / PACIFIC OCEAN	VOLCANIC ROCK	ANDESITE, BASALTIC	VOLCANIC GLASS	2	basin	2.02	12106.8	29.4		29.6	0.846	3.9	10.8	4.25	3.23	3.26	0.365	-22.533	-176.72	-22.533	-176.72
1994	[3927] HERGT J. M. (1994)	samp. 135-834B-33R-2,105-110,7		TONGA ARC / LAU BASIN / CENTRAL LAU SPREADING CENTER - SITE 834 / PACIFIC OCEAN	VOLCANIC ROCK	BASALT	VOLCANIC GLASS	3	basin					24.4	1.28	2.91	9.1	3.71	2.57	2.1	0.07	-18.5675	-177.862	-18.5675	-177.862
1994	[3927] HERGT J. M. (1994)	samp. 135-834B-13R-1,130-131,5		TONGA ARC / LAU BASIN / CENTRAL LAU SPREADING CENTER - SITE 834 / PACIFIC OCEAN	VOLCANIC ROCK	BASALT	VOLCANIC GLASS	3	basin					23.6	0.97	2.6	8.18	3.45	2.3	1.97	0.1	-18.5675	-177.862	-18.5675	-177.862
1994	[3927] HERGT J. M. (1994)	samp. 135-834B-1R-3,83-86,5		TONGA ARC / LAU BASIN / CENTRAL LAU SPREADING CENTER - SITE 834 / PACIFIC OCEAN	VOLCANIC ROCK	BASALT	VOLCANIC GLASS	3	basin					26	1.1	2.67	8.58	3.25	2.31	2.14	0.12	-18.5675	-177.862	-18.5675	-177.862
1994	[3927] HERGT J. M. (1994)	samp. 135-834B-53R-1,9-15,12		TONGA ARC / LAU BASIN / CENTRAL LAU SPREADING CENTER - SITE 834 / PACIFIC OCEAN	VOLCANIC ROCK	BASALT	VOLCANIC GLASS	3	basin					45.4	1.61	4.34	14.87	6.63	4.69	4.48	0.13	-18.5675	-177.862	-18.5675	-177.862
1994	[3927] HERGT J. M. (1994)	samp. 135-834B-49R-1,142-144,12		TONGA ARC / LAU BASIN / CENTRAL LAU SPREADING CENTER - SITE 834 / PACIFIC OCEAN	VOLCANIC ROCK	BASALT	VOLCANIC GLASS	3	basin					48	1.65	4.4	14.35	6.41	4.52	3.95	0.14	-18.5675	-177.862	-18.5675	-177.862
1994	[3927] HERGT J. M. (1994)	samp. 135-834B-15R-2,96-104,6		TONGA ARC / LAU BASIN / CENTRAL LAU SPREADING CENTER - SITE 834 / PACIFIC OCEAN	VOLCANIC ROCK	BASALT	VOLCANIC GLASS	3	basin					43.6	2.17	4.84	14.94	6.43	4.36	3.83	0.15	-18.5675	-177.862	-18.5675	-177.862
1994	[3927] HERGT J. M. (1994)	samp. 135-834B-15R-2,35-37,6		TONGA ARC / LAU BASIN / CENTRAL LAU SPREADING CENTER - SITE 834 / PACIFIC OCEAN	VOLCANIC ROCK	BASALT	VOLCANIC GLASS	3	basin					44.9	2.15	5	15.12	6.13	4.46	3.96	0.16	-18.5675	-177.862	-18.5675	-177.862
1994	[3927] HERGT J. M. (1994)	samp. 135-834B-8R-2,10-13,2		TONGA ARC / LAU BASIN / CENTRAL LAU SPREADING CENTER - SITE 834 / PACIFIC OCEAN	VOLCANIC ROCK	BASALT	VOLCANIC GLASS	3	basin					32.7	1.6	3.48	12.2	4.01	2.98	2.63	0.17	-18.5675	-177.862	-18.5675	-177.862
1994	[3927] HERGT J. M. (1994)	samp. 135-834B-14R-1,28-32,6		TONGA ARC / LAU BASIN / CENTRAL LAU SPREADING CENTER - SITE 834 / PACIFIC OCEAN	VOLCANIC ROCK	BASALT	VOLCANIC GLASS	3	basin					44.5	2.08	4.63	15.21	6.05	4.34	3.73	0.18	-18.5675	-177.862	-18.5675	-177.862
1994	[3927] HERGT J. M. (1994)	samp. 135-834B-18R-1,7-13,6		TONGA ARC / LAU BASIN / CENTRAL LAU SPREADING CENTER - SITE 834 / PACIFIC OCEAN	VOLCANIC ROCK	BASALT	VOLCANIC GLASS	3	basin					33.6	1.66	4.22	12.57	5.06	3.73	3.13	0.19	-18.5675	-177.862	-18.5675	-177.862
2001	[4279] PEATE D. W. (2001)	samp. 42GC		TONGA ARC / LAU BASIN / CENTRAL LAU SPREADING CENTER / PACIFIC OCEAN	VOLCANIC ROCK	BASALT	VOLCANIC GLASS	3	basin			44	313	30.2	0.95	1.58	5.4	3.74	2.98	2.94	0.075	-18.576	-176.428	-18.576	-176.428
2001	[4279] PEATE D. W. (2001)	samp. 15-1-1		TONGA ARC / LAU BASIN / CENTRAL LAU SPREADING CENTER / PACIFIC OCEAN	VOLCANIC ROCK	BASALT	VOLCANIC GLASS	3	basin			44.6	338	29.8	1.12	1.73	5.91	3.68	3.04	3.01	0.081	-18.883	-176.562	-18.883	-176.562
2001	[4279] PEATE D. W. (2001)	samp. 46GC		TONGA ARC / LAU BASIN / CENTRAL LAU SPREADING CENTER / PACIFIC OCEAN	VOLCANIC ROCK	BASALT	VOLCANIC GLASS	3	basin			40.5	363	36	1.27	2.06	7.02	4.53	3.67	3.61	0.108	-18.735	-176.511	-18.735	-176.511
2001	[4279] PEATE D. W. (2001)	samp. 41-2-1		TONGA ARC / LAU BASIN / CENTRAL LAU SPREADING CENTER / PACIFIC OCEAN	VOLCANIC ROCK	BASALT	VOLCANIC GLASS	3	basin			40.3	286	20.6	1.33	1.6	4.69	2.5	2.05	2.08	0.113	-19.277	-176.173	-19.277	-176.173
2001	[4279] PEATE D. W. (2001)	samp. 18GA2		TONGA ARC / LAU BASIN / CENTRAL LAU SPREADING CENTER / PACIFIC OCEAN	VOLCANIC ROCK	BASALT	VOLCANIC GLASS	3	basin			42.1	351	39.4	1.28	2.39	8.18	5.01	3.95	3.89	0.113	-18.595	-176.445	-18.595	-176.445
1994	[6407] PEARCE J. A. (1994)	samp. 23-8-2	13117-23-8-2	TONGA ARC / LAU BASIN / CENTRAL LAU SPREADING CENTER / PACIFIC OCEAN	VOLCANIC ROCK	BASALT	VOLCANIC GLASS	3	basin	0.77	4614.99	36	336	18	0.54	1.27	4.08	2.18	1.88	1.95	0.04	-20.0567	-176.133	-20.0567	-176.133
1994	[6407] PEARCE J. A. (1994)	samp. 41-3-2	13120-41-3-2	TONGA ARC / LAU BASIN / CENTRAL LAU SPREADING CENTER / PACIFIC OCEAN	VOLCANIC ROCK	BASALT	VOLCANIC GLASS	3	basin	0.79	4734.86	34	280	18.1	1.3	1.63	5.06	2.33	1.9	2.09	0.08	-19.2767	-176.173	-19.2767	-176.173
1994	[6407] PEARCE J. A. (1994)	samp. 21-4-1	26949-21-4-1	TONGA ARC / LAU BASIN / CENTRAL LAU SPREADING CENTER / PACIFIC OCEAN	VOLCANIC ROCK	BASALT	VOLCANIC GLASS	3	basin	0.8	4794.79	34	288	20.1	0.76	1.33	4.23	2.41	2.15	2.28	0.06	-19.44	-175.927	-19.44	-175.927
1994	[6407] PEARCE J. A. (1994)	samp. 41-2-1	13120-41-2-1	TONGA ARC / LAU BASIN / CENTRAL LAU SPREADING CENTER / PACIFIC OCEAN	VOLCANIC ROCK	BASALT	VOLCANIC GLASS	3	basin	0.82	4914.66	33	305	18.6	1.28	1.65	5.07	2.37	2.21	2.1	0.08	-19.2767	-176.173	-19.2767	-176.173
1994	[6407] PEARCE J. A. (1994)	samp. 14-4-1	26947-14-4-1	TONGA ARC / LAU BASIN / CENTRAL LAU SPREADING CENTER / PACIFIC OCEAN	VOLCANIC ROCK	BASALT	VOLCANIC GLASS	3	basin	0.83	4974.6	41	298	21.3	0.63	1.97	5.48	2.84	2.32	2.36	0.12	-18.9733	-176.53	-18.9733	-176.53
1994	[6407] PEARCE J. A. (1994)	samp. 23-2-1	13117-23-2-1	TONGA ARC / LAU BASIN / CENTRAL LAU SPREADING CENTER / PACIFIC OCEAN	VOLCANIC ROCK	BASALT	VOLCANIC GLASS	3	basin	0.86	5154.4	36	325	20	0.4	1.49	4.64	2.64	2.09	2.13	0.05	-20.0567	-176.133	-20.0567	-176.133
1994	[6407] PEARCE J. A. (1994)	samp. 23-8-1	13117-23-8-1	TONGA ARC / LAU BASIN / CENTRAL LAU SPREADING CENTER / PACIFIC OCEAN	VOLCANIC ROCK	BASALT	VOLCANIC GLASS	3	basin	0.96	5753.75	36	340	25.4	0.71	1.52	5.01	2.94	2.42	2.53	0.06	-20.0567	-176.133	-20.0567	-176.133
1994	[6407] PEARCE J. A. (1994)	samp. 25-5-1	26951-25-5-1	TONGA ARC / LAU BASIN / CENTRAL LAU SPREADING CENTER / PACIFIC OCEAN	VOLCANIC ROCK	BASALT	VOLCANIC GLASS	3	basin	0.96	5753.75	34	376	23.1	0.69	1.91	6.13	2.9	2.32	2.65	0.08	-20.5833	-176.143	-20.5833	-176.143
1994	[6407] PEARCE J. A. (1994)	samp. 24-1-1	13118-24-1-1	TONGA ARC / LAU BASIN / CENTRAL LAU SPREADING CENTER / PACIFIC OCEAN	VOLCANIC ROCK	BASALT	VOLCANIC GLASS	3	basin	1	5993.49	38	365	24.6	0.67	1.51	5.03	2.88	2.72	2.79	0.06	-20.0917	-176.087	-20.0917	-176.087
1994	[6407] PEARCE J. A. (1994)	samp. 20-1-1	26945-20-1-1	TONGA ARC / LAU BASIN / CENTRAL LAU SPREADING CENTER / PACIFIC OCEAN	VOLCANIC ROCK	BASALT	VOLCANIC GLASS	3	basin	1	5993.49	35	374	27.1	0.83	1.64	5.04	3.32	2.88	2.94	0.06	-19.4883	-175.963	-19.4883	-175.963
1994	[6407] PEARCE J. A. (1994)	samp. 20-5-2	26945-20-5-2	TONGA ARC / LAU BASIN / CENTRAL LAU SPREADING CENTER / PACIFIC OCEAN	VOLCANIC ROCK	BASALT	VOLCANIC GLASS	3	basin	1.01	6053.42	35	373	27.4	0.94	1.72	5.37	3.27	2.97	3.13	0.06	-19.4883	-175.963	-19.4883	-175.963
1994	[6407] PEARCE J. A. (1994)	samp. 22-1-1	13116-22-1-1	TONGA ARC / LAU BASIN / CENTRAL LAU SPREADING CENTER / PACIFIC OCEAN	VOLCANIC ROCK	BASALT	VOLCANIC GLASS	3	basin	1.01	6053.42	36	354	26.9	0.86	1.63	5.17	3.42	2.95	2.86	0.09	-19.6883	-175.993	-19.6883	-175.993
1994	[6407] PEARCE J. A. (1994)	samp. 21-1-2		TONGA ARC / LAU BASIN / CENTRAL LAU SPREADING CENTER / PACIFIC OCEAN	VOLCANIC ROCK	BASALT	VOLCANIC GLASS	3	basin	1.02	6113.36	35	326	25.1	0.86	1.66	4.95	3.13	2.83	2.78	0.09	-19.44	-175.927	-19.44	-175.927
1994	[6407] PEARCE J. A. (1994)	samp. 23-3-2	13117-23-3-2	TONGA ARC / LAU BASIN / CENTRAL LAU SPREADING CENTER / PACIFIC OCEAN	VOLCANIC ROCK	BASALT	VOLCANIC GLASS	3	basin	1.11	6652.77	39	399	28.6	0.95	1.72	5.73	3.53	3.12	3.04	0.06	-20.0567	-176.133	-20.0567	-176.133
1994	[6407] PEARCE J. A. (1994)	samp. 18-1-1	13119-18-1-1	TONGA ARC / LAU BASIN / CENTRAL LAU SPREADING CENTER / PACIFIC OCEAN	VOLCANIC ROCK	BASALT	VOLCANIC GLASS	3	basin	1.12	6712.71	35	249	24.3	0.25	1.33	5.4	3.17	2.66	2.61	0.03	-19.0717	-176.217	-19.0717	-176.217
1994	[6407] PEARCE J. A. (1994)	samp. 18-1-2	13119-18-1-2	TONGA ARC / LAU BASIN / CENTRAL LAU SPREADING CENTER / PACIFIC OCEAN	VOLCANIC ROCK	BASALT	VOLCANIC GLASS	3	basin	1.16	6952.45	38	266	25.4	0.29	1.57	5.62	3.14	2.67	2.77	0.02	-19.0717	-176.217	-19.0717	-176.217
1994	[6407] PEARCE J. A. (1994)	samp. 15-1-2	13114-15-1-2	TONGA ARC / LAU BASIN / CENTRAL LAU SPREADING CENTER / PACIFIC OCEAN	VOLCANIC ROCK	BASALT	VOLCANIC GLASS	3	basin	1.16	6952.45	41	318	28.1	1.06	1.77	6.36	3.52	2.91	3.04	0.07	-18.8833	-176.561	-18.8833	-176.561
1994	[6407] PEARCE J. A. (1994)	samp. 22-6-2	13116-22-6-2	TONGA ARC / LAU BASIN / CENTRAL LAU SPREADING CENTER / PACIFIC OCEAN	VOLCANIC ROCK	BASALT	VOLCANIC GLASS	3	basin	1.21	7252.12	40	399	30	1.67	2.21	7.09	3.77	3.1	3.21	0.12	-19.6883	-175.993	-19.6883	-175.993
1994	[6407] PEARCE J. A. (1994)	samp. 15-1-6		TONGA ARC / LAU BASIN / CENTRAL LAU SPREADING CENTER / PACIFIC OCEAN	VOLCANIC ROCK	BASALT	VOLCANIC GLASS	3	basin	1.51	9050.17	40	436	43.2	1.52	3	10.03	5.39	4.55	4.58	0.12	-18.8833	-176.561	-18.8833	-176.561
1994	[6407] PEARCE J. A. (1994)	samp. 25-2-1	26951-25-2-1	TONGA ARC / LAU BASIN / CENTRAL LAU SPREADING CENTER / PACIFIC OCEAN	VOLCANIC ROCK	BASALT	VOLCANIC GLASS	3	basin	1.94	11627.4	35	514	44.8	2.14	3.7	12.91	6.36	5.13	5.05	0.27	-20.5833	-176.143	-20.5833	-176.143
2008	[12535] KELLER N. S. (2008)	samp. 61.1		TONGA ARC / LAU BASIN / FONUALEI SPREADING CENTER / PACIFIC OCEAN	VOLCANIC ROCK	BASALT	VOLCANIC GLASS	3	basin	0.37	2217.59	38	264	9.6	0.49	2.1	5.2	1.5	1.2	1.2	0.23	-16.0667	-174.517	-16.0667	-174.517
2008	[12535] KELLER N. S. (2008)	samp. 57.1		TONGA ARC / LAU BASIN / FONUALEI SPREADING CENTER / PACIFIC OCEAN	VOLCANIC ROCK	BASALT	VOLCANIC GLASS	3	basin	0.39	2337.46	42	258	10.3	0.37	1.6	3.9	1.5	1.3	1.3	0.15	-17.0167	-174.517	-17.0167	-174.517
2008	[12535] KELLER N. S. (2008)	samp. 56.1		TONGA ARC / LAU BASIN / FONUALEI SPREADING CENTER / PACIFIC OCEAN	VOLCANIC ROCK	BASALT	VOLCANIC GLASS	3	basin	0.4	2397.4	42	256	10.2	0.36	1.5	3.9	1.5	1.2	1.3	0.15	-17.0167	-174.517	-17.0167	-174.517
2008	[12535] KELLER N. S. (2008)	samp. 60.2		TONGA ARC / LAU BASIN / FONUALEI SPREADING CENTER / PACIFIC OCEAN	VOLCANIC ROCK	BASALT	VOLCANIC GLASS	3	basin	0.4	2397.4	38	272	10.6	0.61	2.3	5.6	1.8	1.4	1.4	0.25	-16.75	-174.517	-16.75	-174.517
2008	[12535] KELLER N. S. (2008)	samp. 60.1		TONGA ARC / LAU BASIN / FONUALEI SPREADING CENTER / PACIFIC OCEAN	VOLCANIC ROCK	BASALT	VOLCANIC GLASS	3	basin	0.41	2457.33	37	267	10.6	0.57	2.3	5.6	1.7	1.3	1.4	0.24	-16.75	-174.517	-16.75	-174.517
2008	[12535] KELLER N. S. (2008)	samp. 62.1		TONGA ARC / LAU BASIN / FONUALEI SPREADING CENTER / PACIFIC OCEAN	VOLCANIC ROCK	BASALT	VOLCANIC GLASS	3	basin	0.41	2457.33	39	266	9.3	0.66	2.6	6	1.6	1.2	1.3	0.29	-16.0667	-174.55	-16.0667	-174.55
2008	[12535] KELLER N. S. (2008)	samp. 40.1		TONGA ARC / LAU BASIN / FONUALEI SPREADING CENTER / PACIFIC OCEAN	VOLCANIC ROCK	BASALT	VOLCANIC GLASS	3	basin	0.42	2517.27	39	277	12	0.43	1.9	4.7	1.8	1.5	1.5	0.19	-17.1	-174.517	-17.1	-174.517
2008	[12535] KELLER N. S. (2008)	samp. 34.1		TONGA ARC / LAU BASIN / FONUALEI SPREADING CENTER / PACIFIC OCEAN	VOLCANIC ROCK	BASALT	VOLCANIC GLASS	3	basin	0.43	2577.2	32	255	12.1	0.54	2.2	5.3	1.8	1.5	1.6	0.23	-16.95	-174.533	-16.95	-174.533
2008	[12535] KELLER N. S. (2008)	samp. 66.1		TONGA ARC / LAU BASIN / FONUALEI SPREADING CENTER / PACIFIC OCEAN	VOLCANIC ROCK	BASALT	VOLCANIC GLASS	3	basin	0.44	2637.14	38	244	9.7	0.87	2.1	5	1.6	1.3	1.3	0.23	-16.4833	-174.633	-16.4833	-174.633
2008	[12535] KELLER N. S. (2008)	samp. 61.2		TONGA ARC / LAU BASIN / FONUALEI SPREADING CENTER / PACIFIC OCEAN	VOLCANIC ROCK	BASALT	VOLCANIC GLASS	3	basin	0.44	2637.14	37	256	9.7	0.61	2.1	5.1	1.6	1.2	1.3	0.24	-16.0667	-174.517	-16.0667	-174.517
2008	[12535] KELLER N. S. (2008)	samp. 43.1		TONGA ARC / LAU BASIN / FONUALEI SPREADING CENTER / PACIFIC OCEAN	VOLCANIC ROCK	BASALT	VOLCANIC GLASS	3	basin	0.48	2876.87	39	265	12.5	0.34	2.9	7.3	2	1.5	1.5	0.26	-17.1167	-174.417	-17.1167	-174.417
2008	[12535] KELLER N. S. (2008)	samp. 39.1		TONGA ARC / LAU BASIN / FONUALEI SPREADING CENTER / PACIFIC OCEAN	VOLCANIC ROCK	BASALT	VOLCANIC GLASS	3	basin	0.49	2936.81	39	263	11.2	0.41	1.7	4.4	1.7	1.4	1.4	0.17	-17.0833	-174.533	-17.0833	-174.533
2008	[12535] KELLER N. S. (2008)	samp. 38.1		TONGA ARC / LAU BASIN / FONUALEI SPREADING CENTER / PACIFIC OCEAN	VOLCANIC ROCK	BASALT	VOLCANIC GLASS	3	basin	0.49	2936.81	41	261	12.8	0.48	2.6	6.4	2.1	1.6	1.6	0.26	-17.0833	-174.567	-17.0833	-174.567
2008	[12535] KELLER N. S. (2008)	samp. 68.1		TONGA ARC / LAU BASIN / FONUALEI SPREADING CENTER / PACIFIC OCEAN	VOLCANIC ROCK	BASALT	VOLCANIC GLASS	3	basin	0.5	2996.74	40	245	10.1	0.73	2.7	6.5	1.9	1.3	1.3	0.29	-16.45	-174.517	-16.45	-174.517
2008	[12535] KELLER N. S. (2008)	samp. 64.1		TONGA ARC / LAU BASIN / FONUALEI SPREADING CENTER / PACIFIC OCEAN	VOLCANIC ROCK	BASALT	VOLCANIC GLASS	3	basin	0.55	3296.42	36	281	13.2	0.88	3	7.1	2.3	1.7	1.7	0.33	-16.0667	-174.583	-16.0667	-174.583
2008	[12535] KELLER N. S. (2008)	samp. 42.1		TONGA ARC / LAU BASIN / FONUALEI SPREADING CENTER / PACIFIC OCEAN	VOLCANIC ROCK	BASALT	VOLCANIC GLASS	3	basin	0.57	3416.29	39	252	14.7	0.41	2.4	6.1	2.4	1.7	1.7	0.22	-17.1167	-174.45	-17.1167	-174.45
2008	[12535] KELLER N. S. (2008)	samp. 63.2		TONGA ARC / LAU BASIN / FONUALEI SPREADING CENTER / PACIFIC OCEAN	VOLCANIC ROCK	BASALT	VOLCANIC GLASS	3	basin	0.57	3416.29	33	258	12.6	1.2	2.9	6.8	2.1	1.6	1.7	0.37	-16.65	-174.567	-16.65	-174.567
2008	[12535] KELLER N. S. (2008)	samp. 37.1		TONGA ARC / LAU BASIN / FONUALEI SPREADING CENTER / PACIFIC OCEAN	VOLCANIC ROCK	BASALT	VOLCANIC GLASS	3	basin	0.59	3536.16	32	236	13.2	0.36	2.2	6	2.1	1.6	1.6	0.18	-17.0167	-174.5	-17.0167	-174.5
2008	[12535] KELLER N. S. (2008)	samp. 58.2		TONGA ARC / LAU BASIN / FONUALEI SPREADING CENTER / PACIFIC OCEAN	VOLCANIC ROCK	BASALT	VOLCANIC GLASS	3	basin	0.61	3656.03	37	390	11.2	0.52	2.1	5	1.8	1.5	1.5	0.22	-16.9	-174.517	-16.9	-174.517
2008	[12535] KELLER N. S. (2008)	samp. 67.3		TONGA ARC / LAU BASIN / FONUALEI SPREADING CENTER / PACIFIC OCEAN	VOLCANIC ROCK	BASALT	VOLCANIC GLASS	3	basin	0.61	3656.03	36	253	12.1	1.14	2.7	6.4	2.1	1.5	1.5	0.31	-16.3667	-174.617	-16.3667	-174.617
2008	[12535] KELLER N. S. (2008)	samp. 63.1		TONGA ARC / LAU BASIN / FONUALEI SPREADING CENTER / PACIFIC OCEAN	VOLCANIC ROCK	BASALT	VOLCANIC GLASS	3	basin	0.61	3656.03	34	263	12.7	1.15	2.9	7	2	1.6	1.6	0.36	-16.65	-174.567	-16.65	-174.567
2008	[12535] KELLER N. S. (2008)	samp. 47.1		TONGA ARC / LAU BASIN / FONUALEI SPREADING CENTER / PACIFIC OCEAN	VOLCANIC ROCK	BASALT	VOLCANIC GLASS	3	basin	0.64	3835.83	37	274	14	0.55	2.6	6.3	2.2	1.7	1.7	0.26	-17.6333	-174.567	-17.6333	-174.567
2008	[12535] KELLER N. S. (2008)	samp. 45.1		TONGA ARC / LAU BASIN / FONUALEI SPREADING CENTER / PACIFIC OCEAN	VOLCANIC ROCK	BASALT	VOLCANIC GLASS	3	basin	0.65	3895.77	39	294	13.4	0.54	2.6	6.5	2.1	1.6	1.6	0.2	-17.4667	-174.583	-17.4667	-174.583
2008	[12535] KELLER N. S. (2008)	samp. 48.1		TONGA ARC / LAU BASIN / FONUALEI SPREADING CENTER / PACIFIC OCEAN	VOLCANIC ROCK	BASALT	VOLCANIC GLASS	3	basin	0.72	4315.31	40	309	13.3	0.54	2.5	6.1	2.2	1.6	1.6	0.26	-17.5667	-174.567	-17.5667	-174.567
2008	[12535] KELLER N. S. (2008)	samp. 70.1		TONGA ARC / LAU BASIN / MANGATOLU TRIPLE JUNCTION / PACIFIC OCEAN	VOLCANIC ROCK	BASALT	VOLCANIC GLASS	3	basin	0.78	4674.92	36	205	17.7	1.21	2.1	6	2.9	2.2	2.2	0.18	-15.8667	-174.85	-15.8667	-174.85
2008	[12535] KELLER N. S. (2008)	samp. 69.2		TONGA ARC / LAU BASIN / MANGATOLU TRIPLE JUNCTION / PACIFIC OCEAN	VOLCANIC ROCK	BASALT	VOLCANIC GLASS	3	basin	0.95	5693.81	35	228	20	1.87	3.3	9.1	3.2	2.4	2.4	0.36	-15.6	-174.817	-15.6	-174.817
2008	[12535] KELLER N. S. (2008)	samp. 69.1		TONGA ARC / LAU BASIN / MANGATOLU TRIPLE JUNCTION / PACIFIC OCEAN	VOLCANIC ROCK	BASALT	VOLCANIC GLASS	3	basin	1.1	6592.84	36	244	23.3	2.1	3.5	9.7	3.9	2.9	2.9	0.34	-15.6	-174.817	-15.6	-174.817
2009	[13463] BEZOS A. (2009)	samp. RC124		TONGA ARC / LAU BASIN / NORTHEASTERN LAU SPREADING CENTER / PACIFIC OCEAN	VOLCANIC ROCK	BASALT	VOLCANIC GLASS	3	basin	0.74	4435.18	39.6	249	18.4	0.47	1.11	3.73	0.43	1.87	2.01	0.054	20.096	-176.133	20.096	-176.133
2009	[13463] BEZOS A. (2009)	samp. RC022		TONGA ARC / LAU BASIN / NORTHEASTERN LAU SPREADING CENTER / PACIFIC OCEAN	VOLCANIC ROCK	BASALT	VOLCANIC GLASS	3	basin	0.79	4734.86	40.4	271	20.8	0.53	1.35	4.55	0.49	2.12	2.17	0.07	20.043	-176.123	20.043	-176.123
2009	[13463] BEZOS A. (2009)	samp. RC015		TONGA ARC / LAU BASIN / NORTHEASTERN LAU SPREADING CENTER / PACIFIC OCEAN	VOLCANIC ROCK	BASALT	VOLCANIC GLASS	3	basin	0.8	4794.79	40	260	21.3	0.58	1.24	4.23	2.72	2.19	2.27	0.058	20.104	-176.14	20.104	-176.14
2009	[13463] BEZOS A. (2009)	samp. DR02-1		TONGA ARC / LAU BASIN / NORTHEASTERN LAU SPREADING CENTER / PACIFIC OCEAN	VOLCANIC ROCK	BASALT	VOLCANIC GLASS	3	basin	0.8	4794.79	41.1	273	21.1	0.55	1.38	4.63	0.49	2.15	2.18	0.064	20.07	-176.132	20.07	-176.132
2009	[13463] BEZOS A. (2009)	samp. RC090		TONGA ARC / LAU BASIN / NORTHEASTERN LAU SPREADING CENTER / PACIFIC OCEAN	VOLCANIC ROCK	BASALT	VOLCANIC GLASS	3	basin	0.82	4914.66	39.9	263	20.5	0.54	1.32	4.38	0.48	2.11	2.13	0.063	20.053	-176.126	20.053	-176.126
2009	[13463] BEZOS A. (2009)	samp. RC021		TONGA ARC / LAU BASIN / NORTHEASTERN LAU SPREADING CENTER / PACIFIC OCEAN	VOLCANIC ROCK	BASALT	VOLCANIC GLASS	3	basin	0.83	4974.6	40.3	274	21.3	0.56	1.36	4.63	0.5	2.17	2.2	0.073	20.063	-176.131	20.063	-176.131
2009	[13463] BEZOS A. (2009)	samp. RC019		TONGA ARC / LAU BASIN / NORTHEASTERN LAU SPREADING CENTER / PACIFIC OCEAN	VOLCANIC ROCK	BASALT	VOLCANIC GLASS	3	basin	0.85	5094.47	39.9	271	21	0.53	1.37	4.62	0.49	2.15	2.19	0.071	20.07	-176.129	20.07	-176.129
2009	[13463] BEZOS A. (2009)	samp. DR07-1		TONGA ARC / LAU BASIN / NORTHEASTERN LAU SPREADING CENTER / PACIFIC OCEAN	VOLCANIC ROCK	BASALT	VOLCANIC GLASS	3	basin	0.85	5094.47	42.2	299	27.5	0.83	1.55	5.39	0.63	2.82	2.84	0.074	19.795	-176.034	19.795	-176.034
2009	[13463] BEZOS A. (2009)	samp. RC094		TONGA ARC / LAU BASIN / NORTHEASTERN LAU SPREADING CENTER / PACIFIC OCEAN	VOLCANIC ROCK	BASALT	VOLCANIC GLASS	3	basin	0.85	5094.47	39.1	278	21.2	0.56	1.4	4.74	0.49	2.16	2.19	0.075	20.019	-176.121	20.019	-176.121
2009	[13463] BEZOS A. (2009)	samp. RC013		TONGA ARC / LAU BASIN / NORTHEASTERN LAU SPREADING CENTER / PACIFIC OCEAN	VOLCANIC ROCK	BASALT	VOLCANIC GLASS	3	basin	0.87	5214.34	41.9	275	22.7	0.62	1.3	4.56	0.53	2.33	2.39	0.063	20.155	-176.144	20.155	-176.144
2009	[13463] BEZOS A. (2009)	samp. RC116		TONGA ARC / LAU BASIN / NORTHEASTERN LAU SPREADING CENTER / PACIFIC OCEAN	VOLCANIC ROCK	BASALT	VOLCANIC GLASS	3	basin	0.89	5334.21	37.9	268	22.1	0.62	1.44	4.74	0.52	2.27	2.36	0.065	20.053	-176.131	20.053	-176.131
2009	[13463] BEZOS A. (2009)	samp. RC118		TONGA ARC / LAU BASIN / NORTHEASTERN LAU SPREADING CENTER / PACIFIC OCEAN	VOLCANIC ROCK	BASALT	VOLCANIC GLASS	3	basin	0.9	5394.14	40.7	275	22.4	0.58	1.45	4.88	0.52	2.31	2.37	0.067	20.034	-176.122	20.034	-176.122
2009	[13463] BEZOS A. (2009)	samp. DR05-1		TONGA ARC / LAU BASIN / NORTHEASTERN LAU SPREADING CENTER / PACIFIC OCEAN	VOLCANIC ROCK	BASALT	VOLCANIC GLASS	3	basin	0.92	5514.01	43.4	281	26.1	0.85	1.38	4.87	0.6	2.67	2.71	0.062	19.452	-175.958	19.452	-175.958
2009	[13463] BEZOS A. (2009)	samp. DR07-4		TONGA ARC / LAU BASIN / NORTHEASTERN LAU SPREADING CENTER / PACIFIC OCEAN	VOLCANIC ROCK	BASALT	VOLCANIC GLASS	3	basin	0.93	5573.94	42	263	23.5	0.73	1.36	4.74	0.54	2.41	2.43	0.067	19.795	-176.034	19.795	-176.034
2009	[13463] BEZOS A. (2009)	samp. RC093		TONGA ARC / LAU BASIN / NORTHEASTERN LAU SPREADING CENTER / PACIFIC OCEAN	VOLCANIC ROCK	BASALT	VOLCANIC GLASS	3	basin	0.94	5633.88	41.9	289	23.2	0.53	1.52	5.2	0.53	2.35	2.4	0.078	20.033	-176.125	20.033	-176.125
2009	[13463] BEZOS A. (2009)	samp. DR07-5		TONGA ARC / LAU BASIN / NORTHEASTERN LAU SPREADING CENTER / PACIFIC OCEAN	VOLCANIC ROCK	BASALT	VOLCANIC GLASS	3	basin	0.95	5693.81	41.5	263	23.6	0.75	1.37	4.77	0.55	2.4	2.44	0.066	19.795	-176.034	19.795	-176.034
2009	[13463] BEZOS A. (2009)	samp. RC016		TONGA ARC / LAU BASIN / NORTHEASTERN LAU SPREADING CENTER / PACIFIC OCEAN	VOLCANIC ROCK	BASALT	VOLCANIC GLASS	3	basin	0.96	5753.75	40.1	299	23.9	0.55	1.59	5.4	0.55	2.43	2.51	0.079	20.083	-176.136	20.083	-176.136
2009	[13463] BEZOS A. (2009)	samp. RC005		TONGA ARC / LAU BASIN / NORTHEASTERN LAU SPREADING CENTER / PACIFIC OCEAN	VOLCANIC ROCK	BASALT	VOLCANIC GLASS	3	basin	0.97	5813.68	41.9	276	26	0.84	1.41	4.91	0.59	2.65	2.64	0.074	19.381	-175.961	19.381	-175.961
2009	[13463] BEZOS A. (2009)	samp. RC092		TONGA ARC / LAU BASIN / NORTHEASTERN LAU SPREADING CENTER / PACIFIC OCEAN	VOLCANIC ROCK	BASALT	VOLCANIC GLASS	3	basin	0.98	5873.62		286	23	0.62	1.52	5.24	0.54	2.37	2.4	0.069	20.06	-176.133	20.06	-176.133
2009	[13463] BEZOS A. (2009)	samp. RC007		TONGA ARC / LAU BASIN / NORTHEASTERN LAU SPREADING CENTER / PACIFIC OCEAN	VOLCANIC ROCK	BASALT	VOLCANIC GLASS	3	basin	0.99	5933.55	43.2	304	26.4	0.88	1.37	4.71	0.6	2.7	2.76	0.067	19.55	-175.971	19.55	-175.971
2009	[13463] BEZOS A. (2009)	samp. RC117		TONGA ARC / LAU BASIN / NORTHEASTERN LAU SPREADING CENTER / PACIFIC OCEAN	VOLCANIC ROCK	BASALT	VOLCANIC GLASS	3	basin	1	5993.49	37.9	293	23.9	0.65	1.59	5.32	0.56	2.43	2.54	0.074	20.041	-176.129	20.041	-176.129
2009	[13463] BEZOS A. (2009)	samp. RC023		TONGA ARC / LAU BASIN / NORTHEASTERN LAU SPREADING CENTER / PACIFIC OCEAN	VOLCANIC ROCK	BASALT	VOLCANIC GLASS	3	basin	1.04	6233.23	43.2	318	28	0.79	1.47	5.16	0.63	2.87	2.9	0.068	20.071	-176.137	20.071	-176.137
2009	[13463] BEZOS A. (2009)	samp. DR52-1		TONGA ARC / LAU BASIN / NORTHEASTERN LAU SPREADING CENTER / PACIFIC OCEAN	VOLCANIC ROCK	BASALT	VOLCANIC GLASS	3	basin	1.05	6293.16	43.7	332	28.3	0.78	1.58	5.55	0.64	2.92	2.96	0.072	20.059	-176.133	20.059	-176.133
2009	[13463] BEZOS A. (2009)	samp. RC017		TONGA ARC / LAU BASIN / NORTHEASTERN LAU SPREADING CENTER / PACIFIC OCEAN	VOLCANIC ROCK	BASALT	VOLCANIC GLASS	3	basin	1.06	6353.1	45.5	291	28	0.79	1.41	5.08	0.64	2.9	2.89	0.059	20.085	-176.141	20.085	-176.141
2009	[13463] BEZOS A. (2009)	samp. DR08-1		TONGA ARC / LAU BASIN / NORTHEASTERN LAU SPREADING CENTER / PACIFIC OCEAN	VOLCANIC ROCK	BASALT	VOLCANIC GLASS	3	basin	1.07	6413.03	42.4	319	27.7	0.75	1.59	5.6	0.64	2.84	2.87	0.066	19.955	-176.094	19.955	-176.094
2009	[13463] BEZOS A. (2009)	samp. RC123		TONGA ARC / LAU BASIN / NORTHEASTERN LAU SPREADING CENTER / PACIFIC OCEAN	VOLCANIC ROCK	BASALT	VOLCANIC GLASS	3	basin	1.07	6413.03	42.7	304	26.9	0.73	1.54	5.33	0.63	2.77	2.9	0.066	19.977	-176.099	19.977	-176.099
2009	[13463] BEZOS A. (2009)	samp. RC008		TONGA ARC / LAU BASIN / NORTHEASTERN LAU SPREADING CENTER / PACIFIC OCEAN	VOLCANIC ROCK	BASALT	VOLCANIC GLASS	3	basin	1.12	6712.71	41.2	347	29.9	1.15	1.77	5.85	0.68	3.08	3.14	0.098	19.586	-175.976	19.586	-175.976
2009	[13463] BEZOS A. (2009)	samp. RC122		TONGA ARC / LAU BASIN / NORTHEASTERN LAU SPREADING CENTER / PACIFIC OCEAN	VOLCANIC ROCK	BASALT	VOLCANIC GLASS	3	basin	1.15	6892.51		322	29	0.79	1.75	6.05	0.67	2.94	2.98	0.081	19.985	-176.105	19.985	-176.105
2009	[13463] BEZOS A. (2009)	samp. RC091		TONGA ARC / LAU BASIN / NORTHEASTERN LAU SPREADING CENTER / PACIFIC OCEAN	VOLCANIC ROCK	BASALT	VOLCANIC GLASS	3	basin	1.18	7072.32	43.5	340	30.7	0.85	1.67	5.93	0.7	3.17	3.21	0.073	20.053	-176.132	20.053	-176.132
2009	[13463] BEZOS A. (2009)	samp. CT10-1		TONGA ARC / LAU BASIN / NORTHEASTERN LAU SPREADING CENTER / PACIFIC OCEAN	VOLCANIC ROCK	BASALT	VOLCANIC GLASS	3	basin	1.18	7072.32		341	30.8	0.83	1.73	6.05	0.69	3.12	3.18	0.075	20.053	-176.131	20.053	-176.131
2009	[13463] BEZOS A. (2009)	samp. RC011		TONGA ARC / LAU BASIN / NORTHEASTERN LAU SPREADING CENTER / PACIFIC OCEAN	VOLCANIC ROCK	BASALT	VOLCANIC GLASS	3	basin	1.19	7132.25	41.1	330	31.2	1.06	1.72	5.91	0.71	3.18	3.23	0.091	19.85	-176.049	19.85	-176.049
2009	[13463] BEZOS A. (2009)	samp. RC120		TONGA ARC / LAU BASIN / NORTHEASTERN LAU SPREADING CENTER / PACIFIC OCEAN	VOLCANIC ROCK	BASALT	VOLCANIC GLASS	3	basin	1.21	7252.12		335	31.6	0.87	1.82	6.36	0.72	3.2	3.22	0.081	20.001	-176.108	20.001	-176.108
2009	[13463] BEZOS A. (2009)	samp. RC010		TONGA ARC / LAU BASIN / NORTHEASTERN LAU SPREADING CENTER / PACIFIC OCEAN	VOLCANIC ROCK	BASALT	VOLCANIC GLASS	3	basin	1.21	7252.12	42.5	334	32.3	1.29	1.9	6.45	0.74	3.34	3.35	0.106	19.733	-176.016	19.733	-176.016
2009	[13463] BEZOS A. (2009)	samp. RC121		TONGA ARC / LAU BASIN / NORTHEASTERN LAU SPREADING CENTER / PACIFIC OCEAN	VOLCANIC ROCK	BASALT	VOLCANIC GLASS	3	basin	1.22	7312.06	42.6	333	31.3	0.87	1.73	6.1	0.72	3.22	3.3	0.073	19.911	-176.106	19.911	-176.106
2009	[13463] BEZOS A. (2009)	samp. DR07-2		TONGA ARC / LAU BASIN / NORTHEASTERN LAU SPREADING CENTER / PACIFIC OCEAN	VOLCANIC ROCK	BASALT	VOLCANIC GLASS	3	basin	1.29	7731.6	41.2	362	33.8	0.98	1.83	6.35	0.77	3.5	3.58	0.087	19.795	-176.034	19.795	-176.034
2009	[13463] BEZOS A. (2009)	samp. DR06-1		TONGA ARC / LAU BASIN / NORTHEASTERN LAU SPREADING CENTER / PACIFIC OCEAN	VOLCANIC ROCK	BASALT	VOLCANIC GLASS	3	basin	1.34	8031.28	41.6	352	34.1	1.29	2.06	6.89	0.78	3.45	3.48	0.113	19.625	-175.984	19.625	-175.984
2009	[13463] BEZOS A. (2009)	samp. DR06-T2		TONGA ARC / LAU BASIN / NORTHEASTERN LAU SPREADING CENTER / PACIFIC OCEAN	VOLCANIC ROCK	BASALT	VOLCANIC GLASS	3	basin	1.34	8031.28	40.6	354	37	1.57	2.33	7.71	0.85	3.72	3.77	0.132	19.625	-175.984	19.625	-175.984
2001	[4279] PEATE D. W. (2001)	samp. 84KD1		TONGA ARC / LAU BASIN / VALU FA RIDGE / PACIFIC OCEAN	VOLCANIC ROCK	BASALT	VOLCANIC GLASS	3	basin			39.6	311	16.8	0.37	1.51	4.21	2.14	1.64	1.67	0.133	-22.14	-176.61	-22.14	-176.61
2001	[4279] PEATE D. W. (2001)	samp. 114KD		TONGA ARC / LAU BASIN / VALU FA RIDGE / PACIFIC OCEAN	VOLCANIC ROCK	BASALT	VOLCANIC GLASS	3	basin			43.1	280	13.6	0.23	1.7	4.28	1.89	1.38	1.39	0.199	-22.186	-176.555	-22.186	-176.555
2002	[6185] HAASE K. M. (2002)	samp. 2DR-2		TONGA ARC / LAU BASIN / VALU FA RIDGE / PACIFIC OCEAN	VOLCANIC ROCK	BASALT	VOLCANIC GLASS	3	basin	1.67	10009.1	39.8		24.5	1.08	3.1	9.69	4.18	2.85	2.69	0.14	-23.926	-177.111	-23.926	-177.111
1997	[2495] TURNER SIMON P. (1997)	samp. FON31	8617-FON31	TONGA ARC / LAU BASIN / FONUALEI SPREADING CENTER / PACIFIC OCEAN	VOLCANIC ROCK	ANDESITE	WHOLE ROCK	5	basin			32	190	22	1.39	3.3	7.64	2.67	1.95	2.09	0.321	-17.7	-174.33	-17.7	-174.33
1994	[3056] EWART A. (1994)	samp. F31	8617-F31	TONGA ARC / LAU BASIN / FONUALEI SPREADING CENTER / PACIFIC OCEAN	VOLCANIC ROCK	ANDESITE	WHOLE ROCK	5	basin	0.66	3955.7	35		7.3	0.55	3.3	7.64	2.67	1.95	2.09	0.32	-17.7	-174.33	-17.7	-174.33
1998	[3371] EWART A. (1998)	samp. F30	8617-F30	TONGA ARC / LAU BASIN / FONUALEI SPREADING CENTER / PACIFIC OCEAN	VOLCANIC ROCK	ANDESITE	WHOLE ROCK	5	basin			35.5	207	13.6	0.65	2.49	6.37	2.07	1.5	1.56	0.305	-17.7	-174.33	-17.7	-174.33
1998	[3371] EWART A. (1998)	samp. F31	8617-F31	TONGA ARC / LAU BASIN / FONUALEI SPREADING CENTER / PACIFIC OCEAN	VOLCANIC ROCK	ANDESITE	WHOLE ROCK	5	basin			34.2	194	16.2	0.7	3.28	8.2	2.5	1.79	1.85	0.34	-17.7	-174.33	-17.7	-174.33
2007	[10608] PEARCE J. A.(2007) [GeoReM [2940] ]	samp. 71-385		TONGA ARC / LAU BASIN / LAU RIDGE / PACIFIC OCEAN	VOLCANIC ROCK	ANDESITE	WHOLE ROCK	5	basin	0.93	5573.94	26.5	217	70	2.88	11.41	19.84	7.09	5.85	5.47	0.735	-21.5	-178.8	-21.5	-178.8
1992	[3336] FALLOON T. J. (1992)	samp. M-2226-1A	16090-M2226/1A	TONGA ARC / LAU BASIN / MANGATOLU TRIPLE JUNCTION / PACIFIC OCEAN	VOLCANIC ROCK	ANDESITE	WHOLE ROCK	5	basin	1.79	10728.3	32	185	60.4	6.2	7.7	22.5	8.37	6.36	5.63	0.71	-15.388	-174.667	-15.388	-174.667
1990	[3924] BOESPFLUG X. (1990)	samp. DR3-1C		TONGA ARC / LAU BASIN / VALU FA RIDGE / PACIFIC OCEAN	VOLCANIC ROCK	ANDESITE	WHOLE ROCK	5	basin	0.6	3596.09	36.5		17.4	0.4	1.34	3.4			1.5	0.168	-21.38	-176.27	-21.38	-176.27
1990	[3924] BOESPFLUG X. (1990)	samp. DR4-1C		TONGA ARC / LAU BASIN / VALU FA RIDGE / PACIFIC OCEAN	VOLCANIC ROCK	ANDESITE	WHOLE ROCK	5	basin	1.3	7791.54	35.2		31.9	1.6	3.22	9.3			2.9	0.207	-21.32	-176.33	-21.32	-176.33
1990	[3924] BOESPFLUG X. (1990)	samp. DR2-1C		TONGA ARC / LAU BASIN / VALU FA RIDGE / PACIFIC OCEAN	VOLCANIC ROCK	ANDESITE	WHOLE ROCK	5	basin	1.47	8810.43	33.4		34	1.6	3.6	9.6			3	0.258	-21.87	-176.38	-21.87	-176.38
2006	[9804] FRETZDORFF S. (2006)	samp. 78 DR-3		TONGA ARC / LAU BASIN / VALU FA RIDGE / PACIFIC OCEAN	VOLCANIC ROCK	ANDESITE	WHOLE ROCK	5	basin	1.34	8031.28	19.7		38.9	1.17	5.55	15.3	5.72	4.29	4.3	0.531	-22.858	-176.742	-22.858	-176.742
2006	[9804] FRETZDORFF S. (2006)	samp. 46DR-1		TONGA ARC / LAU BASIN / VALU FA RIDGE / PACIFIC OCEAN	VOLCANIC ROCK	ANDESITE	WHOLE ROCK	5	basin	1.34	8031.28	21		40.3	1.21	5.65	15.6	5.88	4.38	4.37	0.534	-22.218	-176.608	-22.218	-176.608
2006	[9804] FRETZDORFF S. (2006)	samp. 52DR-1		TONGA ARC / LAU BASIN / VALU FA RIDGE / PACIFIC OCEAN	VOLCANIC ROCK	ANDESITE	WHOLE ROCK	5	basin	1.34	8031.28	21.3		41.4	1.25	5.85	16.2	6.01	4.48	4.51	0.548	-22.218	-176.61	-22.218	-176.61
2006	[9804] FRETZDORFF S. (2006)	samp. 51DR-2		TONGA ARC / LAU BASIN / VALU FA RIDGE / PACIFIC OCEAN	VOLCANIC ROCK	ANDESITE	WHOLE ROCK	5	basin	1.44	8630.62	25.3		36.5	1.08	4.91	13.6	5.24	3.98	4.02	0.468	-22.217	-176.61	-22.217	-176.61
2006	[9804] FRETZDORFF S. (2006)	samp. 51DR-1		TONGA ARC / LAU BASIN / VALU FA RIDGE / PACIFIC OCEAN	VOLCANIC ROCK	ANDESITE	WHOLE ROCK	5	basin	1.56	9349.84	23.6		37	1.12	5.08	14	5.35	4.03	4.05	0.487	-22.217	-176.61	-22.217	-176.61
2007	[10608] PEARCE J. A.(2007) [GeoReM [2940] ]	samp. KH4		TONGA ARC / LAU BASIN / LAU RIDGE / PACIFIC OCEAN	VOLCANIC ROCK	ANDESITE, BASALTIC	WHOLE ROCK	6	basin	0.81	4854.73	37.8	343	16.7	0.97	4.54	10.74	3.04	1.79	1.69	0.38	-21.5	-178.8	-21.5	-178.8
2007	[10608] PEARCE J. A.(2007) [GeoReM [2940] ]	samp. 71-380		TONGA ARC / LAU BASIN / LAU RIDGE / PACIFIC OCEAN	VOLCANIC ROCK	ANDESITE, BASALTIC	WHOLE ROCK	6	basin	0.91	5454.08	28.9	249	29.7	1.28	4.93	12.05	3.47	2.72	2.78	0.398	-21.5	-178.8	-21.5	-178.8
2007	[10608] PEARCE J. A.(2007) [GeoReM [2940] ]	samp. 69-831		TONGA ARC / LAU BASIN / LAU RIDGE / PACIFIC OCEAN	VOLCANIC ROCK	ANDESITE, BASALTIC	WHOLE ROCK	6	basin	0.92	5514.01	25.6	267	17.1	0.88	3.72	9.11	2.36	1.62	1.61	0.259	-21.5	-178.8	-21.5	-178.8
2007	[10608] PEARCE J. A.(2007) [GeoReM [2940] ]	samp. VB595		TONGA ARC / LAU BASIN / LAU RIDGE / PACIFIC OCEAN	VOLCANIC ROCK	ANDESITE, BASALTIC	WHOLE ROCK	6	basin	1	5993.49	33.6	263	19.6	4.09	5.47	13.14	3.47	2.08	2	0.47	-21.5	-178.8	-21.5	-178.8
2011	[15652] TODD E.(2011) [GeoReM [6234] ]	samp. 37D-B		TONGA ARC / LAU BASIN / VALU FA RIDGE / PACIFIC OCEAN	VOLCANIC ROCK	ANDESITE, BASALTIC	WHOLE ROCK	6	basin	1.13	6772.64	34	381	25	0.7	2.68	7.7	3.27	2.65	2.52	0.23	-22.05	177.41	-22.05	177.41
2006	[9804] FRETZDORFF S. (2006)	samp. 79 DR-2		TONGA ARC / LAU BASIN / VALU FA RIDGE / PACIFIC OCEAN	VOLCANIC ROCK	ANDESITE, BASALTIC	WHOLE ROCK	6	basin	0.65	3895.77	34.5		14.8	0.263	1.85	4.81	2.07	1.66	1.71	0.252	-22.837	-176.785	-22.837	-176.785
2006	[9804] FRETZDORFF S. (2006)	samp. 78 DR-4		TONGA ARC / LAU BASIN / VALU FA RIDGE / PACIFIC OCEAN	VOLCANIC ROCK	ANDESITE, BASALTIC	WHOLE ROCK	6	basin	0.66	3955.7	36.6		14.6	0.276	1.81	4.64	2.12	1.63	1.61	0.23	-22.858	-176.742	-22.858	-176.742
2006	[9804] FRETZDORFF S. (2006)	samp. 48GTV-3		TONGA ARC / LAU BASIN / VALU FA RIDGE / PACIFIC OCEAN	VOLCANIC ROCK	ANDESITE, BASALTIC	WHOLE ROCK	6	basin	1.23	7371.99	31.8		28.4	0.831	3.13	9.17	3.96	3.11	3.11	0.257	-22.217	-176.608	-22.217	-176.608
2006	[9804] FRETZDORFF S. (2006)	samp. 45GTV-1		TONGA ARC / LAU BASIN / VALU FA RIDGE / PACIFIC OCEAN	VOLCANIC ROCK	ANDESITE, BASALTIC	WHOLE ROCK	6	basin	1.25	7491.86	46.2		29.8	0.851	3.06	9.49	3.94	3.03	3.09	0.233	-22.215	-176.608	-22.215	-176.608
2006	[9804] FRETZDORFF S. (2006)	samp. 64 DR-1		TONGA ARC / LAU BASIN / VALU FA RIDGE / PACIFIC OCEAN	VOLCANIC ROCK	ANDESITE, BASALTIC	WHOLE ROCK	6	basin	1.42	8510.75	30.5		28.1	0.805	3.85	10.5	3.96	3.07	3.1	0.372	-22.528	-176.717	-22.528	-176.717
2006	[9804] FRETZDORFF S. (2006)	samp. 68 GTV-1		TONGA ARC / LAU BASIN / VALU FA RIDGE / PACIFIC OCEAN	VOLCANIC ROCK	ANDESITE, BASALTIC	WHOLE ROCK	6	basin	1.6	9589.58	29.2		29.6	0.856	3.92	10.8	4.24	3.23	3.25	0.365	-22.533	-176.718	-22.533	-176.718
2007	[10608] PEARCE J. A.(2007) [GeoReM [2940] ]	samp. 25-2-1	26951-25-2-1	TONGA ARC / LAU BASIN / CENTRAL LAU SPREADING CENTER / PACIFIC OCEAN	VOLCANIC ROCK	ANDESITE, BASALTIC, THOLEIITIC	WHOLE ROCK	6	basin			35	514	44.8	2.14	3.7	12.91	6.36	5.13	5.05	0.27	-20.5833	-176.143	-20.5833	-176.143
2007	[10608] PEARCE J. A.(2007) [GeoReM [2940] ]	samp. 20-5-2	26945-20-5-2	TONGA ARC / LAU BASIN / CENTRAL LAU SPREADING CENTER / PACIFIC OCEAN	VOLCANIC ROCK	ANDESITE, THOLEIITIC	WHOLE ROCK	6	basin			42	373	28.6	0.91	1.57	5.1	3.27	2.93	3.05	0.068	-19.4883	-175.963	-19.4883	-175.963
2007	[10608] PEARCE J. A.(2007) [GeoReM [2940] ]	samp. L1-11		TONGA ARC / LAU BASIN / VALU FA RIDGE / PACIFIC OCEAN	VOLCANIC ROCK	ANDESITE, THOLEIITIC	WHOLE ROCK	6	basin	1.46	8750.49	30.8	421	36.7	1.11	4.38	12.2	4.91	3.75	3.77	0.417	-22.08	-176.57	-22.5	-176.7
1994	[3056] EWART A. (1994)	samp. 135-834B-11R-3,86-89		TONGA ARC / LAU BASIN / CENTRAL LAU SPREADING CENTER - SITE 834 / PACIFIC OCEAN	VOLCANIC ROCK	BASALT	WHOLE ROCK	7	basin	1.09	6532.9	35	213	21.3	2.48	3.04	9.3	3.48	2.77	2.38	0.18	-18.5675	-177.862	-18.5675	-177.862
1994	[3056] EWART A. (1994)	samp. 135-834B-35R-1,58-60		TONGA ARC / LAU BASIN / CENTRAL LAU SPREADING CENTER - SITE 834 / PACIFIC OCEAN	VOLCANIC ROCK	BASALT	WHOLE ROCK	7	basin	1.15	6892.51	43	249	23.5	1.1	2.48	8.23	3.65	2.66	2.32	0.13	-18.5675	-177.862	-18.5675	-177.862
1994	[3056] EWART A. (1994)	samp. 135-834B-57R-1,126-128		TONGA ARC / LAU BASIN / CENTRAL LAU SPREADING CENTER - SITE 834 / PACIFIC OCEAN	VOLCANIC ROCK	BASALT	WHOLE ROCK	7	basin	1.19	7132.25	43	255	23.2	0.91	2.85	8.55	4	3.24	2.67	0.28	-18.5675	-177.862	-18.5675	-177.862
1994	[3056] EWART A. (1994)	samp. 135-834B-31R-3,73-78		TONGA ARC / LAU BASIN / CENTRAL LAU SPREADING CENTER - SITE 834 / PACIFIC OCEAN	VOLCANIC ROCK	BASALT	WHOLE ROCK	7	basin	1.29	7731.6	41	222	23.5	1.6	3.15	9.95	3.68	2.6	2.21	0.07	-18.5675	-177.862	-18.5675	-177.862
1994	[3056] EWART A. (1994)	samp. 135-834B-8R-2,12-18		TONGA ARC / LAU BASIN / CENTRAL LAU SPREADING CENTER - SITE 834 / PACIFIC OCEAN	VOLCANIC ROCK	BASALT	WHOLE ROCK	7	basin	1.41	8450.82	34	276	25	1.45	3.92	11.3	4.06	2.89	2.52	0.18	-18.5675	-177.862	-18.5675	-177.862
1994	[3056] EWART A. (1994)	samp. 135-834B-37R-1,36-42		TONGA ARC / LAU BASIN / CENTRAL LAU SPREADING CENTER - SITE 834 / PACIFIC OCEAN	VOLCANIC ROCK	BASALT	WHOLE ROCK	7	basin	1.62	9709.45	38	266	34.5	1.35	3.19	11.1	4.95	3.76	3.39	0.1	-18.5675	-177.862	-18.5675	-177.862
1994	[3056] EWART A. (1994)	samp. 135-834B-40R-1,57-60		TONGA ARC / LAU BASIN / CENTRAL LAU SPREADING CENTER - SITE 834 / PACIFIC OCEAN	VOLCANIC ROCK	BASALT	WHOLE ROCK	7	basin	1.66	9949.19	33	352	31.3	1.21	3.94	12.05	4.86	3.57	3.21	0.27	-18.5675	-177.862	-18.5675	-177.862
1994	[3056] EWART A. (1994)	samp. 135-834B-15R-2,47-56		TONGA ARC / LAU BASIN / CENTRAL LAU SPREADING CENTER - SITE 834 / PACIFIC OCEAN	VOLCANIC ROCK	BASALT	WHOLE ROCK	7	basin	1.8	10788.3	43	299	37.1	1.89	4.68	14.8	5.93	4.43	4.33	0.21	-18.5675	-177.862	-18.5675	-177.862
1994	[3056] EWART A. (1994)	samp. 135-834B-55R-1,23-25		TONGA ARC / LAU BASIN / CENTRAL LAU SPREADING CENTER - SITE 834 / PACIFIC OCEAN	VOLCANIC ROCK	BASALT	WHOLE ROCK	7	basin	2.16	12945.9	33	413	38.4	1.55	4.62	14.65	5.94	4.35	3.93	0.14	-18.5675	-177.862	-18.5675	-177.862
1994	[3927] HERGT J. M. (1994)	samp. 135-834B-34R-2,60-63,8		TONGA ARC / LAU BASIN / CENTRAL LAU SPREADING CENTER - SITE 834 / PACIFIC OCEAN	VOLCANIC ROCK	BASALT	WHOLE ROCK	7	basin					26.2	0.97	2.21	7.59	3.89	2.66	2.42	0.05	-18.5675	-177.862	-18.5675	-177.862
1994	[3927] HERGT J. M. (1994)	samp. 135-834B-35R-1,15-23,8		TONGA ARC / LAU BASIN / CENTRAL LAU SPREADING CENTER - SITE 834 / PACIFIC OCEAN	VOLCANIC ROCK	BASALT	WHOLE ROCK	7	basin					27.6	0.96	2.24	7.48	3.84	2.78	2.34	0.06	-18.5675	-177.862	-18.5675	-177.862
1994	[3927] HERGT J. M. (1994)	samp. 135-834B-35R-2,77-83,8	26152-135-834B-35R-2, 77-83, 8G	TONGA ARC / LAU BASIN / CENTRAL LAU SPREADING CENTER - SITE 834 / PACIFIC OCEAN	VOLCANIC ROCK	BASALT	WHOLE ROCK	7	basin					27.9	0.9	2.36	7.64	3.71	2.7	2.45	0.07	-18.5675	-177.862	-18.5675	-177.862
1994	[3927] HERGT J. M. (1994)	samp. 135-834B-31R-1,98-104,7	26152-135-834B-31R-1, 98-104, 7G	TONGA ARC / LAU BASIN / CENTRAL LAU SPREADING CENTER - SITE 834 / PACIFIC OCEAN	VOLCANIC ROCK	BASALT	WHOLE ROCK	7	basin					29.3	1.51	3.54	11.03	4.32	3.03	2.59	0.07	-18.5675	-177.862	-18.5675	-177.862
1994	[3927] HERGT J. M. (1994)	samp. 135-834B-26R-1,107-109,7		TONGA ARC / LAU BASIN / CENTRAL LAU SPREADING CENTER - SITE 834 / PACIFIC OCEAN	VOLCANIC ROCK	BASALT	WHOLE ROCK	7	basin					29.2	1.41	3.36	10.88	4.38	3.1	2.65	0.07	-18.5675	-177.862	-18.5675	-177.862
1994	[3927] HERGT J. M. (1994)	samp. 135-834B-36R-1,0-7,8		TONGA ARC / LAU BASIN / CENTRAL LAU SPREADING CENTER - SITE 834 / PACIFIC OCEAN	VOLCANIC ROCK	BASALT	WHOLE ROCK	7	basin					27.7	0.89	2.18	7.54	3.83	2.64	2.31	0.08	-18.5675	-177.862	-18.5675	-177.862
1994	[3927] HERGT J. M. (1994)	samp. 135-834B-59R-2,52-55,13		TONGA ARC / LAU BASIN / CENTRAL LAU SPREADING CENTER - SITE 834 / PACIFIC OCEAN	VOLCANIC ROCK	BASALT	WHOLE ROCK	7	basin					27.3	0.95	2.44	8.28	4.01	2.77	2.59	0.08	-18.5675	-177.862	-18.5675	-177.862
1994	[3927] HERGT J. M. (1994)	samp. 135-834B-33R-1,0-6,7	26152-135-834B-33R-1, 0-6, 7G	TONGA ARC / LAU BASIN / CENTRAL LAU SPREADING CENTER - SITE 834 / PACIFIC OCEAN	VOLCANIC ROCK	BASALT	WHOLE ROCK	7	basin					30.2	1.59	3.43	10.95	4.52	3.18	2.73	0.08	-18.5675	-177.862	-18.5675	-177.862
1994	[3927] HERGT J. M. (1994)	samp. 135-834B-31R-2,43-48,7	26152-135-834B-31R-2, 43-48, 7G	TONGA ARC / LAU BASIN / CENTRAL LAU SPREADING CENTER - SITE 834 / PACIFIC OCEAN	VOLCANIC ROCK	BASALT	WHOLE ROCK	7	basin					29.4	1.57	3.37	10.68	4.35	3.02	2.55	0.09	-18.5675	-177.862	-18.5675	-177.862
1994	[3927] HERGT J. M. (1994)	samp. 135-834B-56R-2,111-118,13		TONGA ARC / LAU BASIN / CENTRAL LAU SPREADING CENTER - SITE 834 / PACIFIC OCEAN	VOLCANIC ROCK	BASALT	WHOLE ROCK	7	basin					28.4	0.95	2.6	8.52	4.07	2.82	2.43	0.11	-18.5675	-177.862	-18.5675	-177.862
1994	[3927] HERGT J. M. (1994)	samp. 135-834B-46R-1,37-40,11	26152-135-834B-46R-1, 37-40, 11G	TONGA ARC / LAU BASIN / CENTRAL LAU SPREADING CENTER - SITE 834 / PACIFIC OCEAN	VOLCANIC ROCK	BASALT	WHOLE ROCK	7	basin					24.6	0.78	2.45	7.65	3.58	2.51	2.16	0.13	-18.5675	-177.862	-18.5675	-177.862
1994	[3927] HERGT J. M. (1994)	samp. 135-834B-47R-1,130-135,12		TONGA ARC / LAU BASIN / CENTRAL LAU SPREADING CENTER - SITE 834 / PACIFIC OCEAN	VOLCANIC ROCK	BASALT	WHOLE ROCK	7	basin					47.8	1.58	4.65	14.68	6.9	4.7	4.14	0.14	-18.5675	-177.862	-18.5675	-177.862
1994	[3927] HERGT J. M. (1994)	samp. 135-834B-39R-1,9-15,10A	26152-135-834B-39R-1, 9-15, 10AG	TONGA ARC / LAU BASIN / CENTRAL LAU SPREADING CENTER - SITE 834 / PACIFIC OCEAN	VOLCANIC ROCK	BASALT	WHOLE ROCK	7	basin					37.2	1.16	3.69	11.08	4.82	3.53	3.18	0.23	-18.5675	-177.862	-18.5675	-177.862
1994	[3927] HERGT J. M. (1994)	samp. 135-834B-40R-1,45-47,10A		TONGA ARC / LAU BASIN / CENTRAL LAU SPREADING CENTER - SITE 834 / PACIFIC OCEAN	VOLCANIC ROCK	BASALT	WHOLE ROCK	7	basin					38.3	1.19	3.78	11.52	4.94	3.71	3.31	0.23	-18.5675	-177.862	-18.5675	-177.862
1994	[3927] HERGT J. M. (1994)	samp. 135-834B-37R-2,42-44,10A	26152-135-834B-37R-2, 42-44, 10AG	TONGA ARC / LAU BASIN / CENTRAL LAU SPREADING CENTER - SITE 834 / PACIFIC OCEAN	VOLCANIC ROCK	BASALT	WHOLE ROCK	7	basin					61.8	1.82	5.49	17.64	7.98	6.23	5.44	0.28	-18.5675	-177.862	-18.5675	-177.862
1994	[3056] EWART A. (1994)	samp. 135-835B-7R-1,15-22		TONGA ARC / LAU BASIN / CENTRAL LAU SPREADING CENTER - SITE 835 / PACIFIC OCEAN	VOLCANIC ROCK	BASALT	WHOLE ROCK	7	basin	0.93	5573.94	41	274	21.5	0.49	2.36	6.07	3.55	2.69	2.68	0.18	-18.5008	-177.303	-18.5008	-177.303
1994	[3056] EWART A. (1994)	samp. 135-835B-4R-1,134-141		TONGA ARC / LAU BASIN / CENTRAL LAU SPREADING CENTER - SITE 835 / PACIFIC OCEAN	VOLCANIC ROCK	BASALT	WHOLE ROCK	7	basin	0.96	5753.75	44	278	21.8	0.52	2	5.15	2.69	2.01	1.97	0.11	-18.5008	-177.303	-18.5008	-177.303
1994	[3321] HERGT J. M. (1994)	samp. 135-835B-7R-3,135-140,1	26154-135-835B-7R-3, 135-140, 1	TONGA ARC / LAU BASIN / CENTRAL LAU SPREADING CENTER - SITE 835 / PACIFIC OCEAN	VOLCANIC ROCK	BASALT	WHOLE ROCK	7	basin	0.99	5933.55			24.2	0.51	1.87	5.47	3.09	2.43	2.37	0.2	-18.5008	-177.303	-18.5008	-177.303
1994	[3321] HERGT J. M. (1994)	samp. 135-835B-3R-2,0-4,1	26154-135-835B-3R-2, 0-4, 1	TONGA ARC / LAU BASIN / CENTRAL LAU SPREADING CENTER - SITE 835 / PACIFIC OCEAN	VOLCANIC ROCK	BASALT	WHOLE ROCK	7	basin	1.01	6053.42			23.9	0.59	1.94	5.71	3.25	2.51	2.25	0.14	-18.5008	-177.303	-18.5008	-177.303
1994	[3321] HERGT J. M. (1994)	samp. 135-835B-3R-1,123-127,1	26154-135-835B-3R-1, 123-127, 1	TONGA ARC / LAU BASIN / CENTRAL LAU SPREADING CENTER - SITE 835 / PACIFIC OCEAN	VOLCANIC ROCK	BASALT	WHOLE ROCK	7	basin	1.04	6233.23			23.3	0.56	1.81	5.3	3.1	2.31	2.22	0.13	-18.5008	-177.303	-18.5008	-177.303
1994	[3321] HERGT J. M. (1994)	samp. 135-835B-5R-1,14-21,1	26154-135-835B-5R-1, 14-21, 1	TONGA ARC / LAU BASIN / CENTRAL LAU SPREADING CENTER - SITE 835 / PACIFIC OCEAN	VOLCANIC ROCK	BASALT	WHOLE ROCK	7	basin	1.11	6652.77			24.4	0.54	1.94	5.39	3.3	2.4	2.26	0.13	-18.5008	-177.303	-18.5008	-177.303
1994	[3321] HERGT J. M. (1994)	samp. 135-835B-4R-1,73-78,1	26154-135-835B-4R-1, 73-78, 1	TONGA ARC / LAU BASIN / CENTRAL LAU SPREADING CENTER - SITE 835 / PACIFIC OCEAN	VOLCANIC ROCK	BASALT	WHOLE ROCK	7	basin	1.61	9649.52			25.9	0.61	2.21	5.76	3.48	2.53	2.31	0.15	-18.5008	-177.303	-18.5008	-177.303
1994	[3321] HERGT J. M. (1994)	samp. 135-835B-7R-2,75-84,1		TONGA ARC / LAU BASIN / CENTRAL LAU SPREADING CENTER - SITE 835 / PACIFIC OCEAN	VOLCANIC ROCK	BASALT	WHOLE ROCK	7	basin					20.6	0.48	1.61	4.42	2.7	2.14	1.91	0.12	-18.5008	-177.303	-18.5008	-177.303
2008	[12975] TIAN LIYAN(2008) [GeoReM [4437] ]	samp. 12-1		TONGA ARC / LAU BASIN / CENTRAL LAU SPREADING CENTER / PACIFIC OCEAN	VOLCANIC ROCK	BASALT	WHOLE ROCK	7	basin	0.48	2876.87			12.2	0.7	1.56	4.15		1.34	1.3	0.26	-19.178	-175.138	-19.178	-175.138
2008	[12975] TIAN LIYAN(2008) [GeoReM [4437] ]	samp. 12-2		TONGA ARC / LAU BASIN / CENTRAL LAU SPREADING CENTER / PACIFIC OCEAN	VOLCANIC ROCK	BASALT	WHOLE ROCK	7	basin	0.55	3296.42			9.28	0.74	3.49	7.68		3.97	3.83	0.27	-19.178	-175.138	-19.178	-175.138
2008	[12975] TIAN LIYAN(2008) [GeoReM [4437] ]	samp. 27-1		TONGA ARC / LAU BASIN / CENTRAL LAU SPREADING CENTER / PACIFIC OCEAN	VOLCANIC ROCK	BASALT	WHOLE ROCK	7	basin	1.12	6712.71			25.79	1.38	2.01	5.77		2.75	2.64	0.14	-18.497	-176.348	-18.497	-176.348
2008	[12975] TIAN LIYAN(2008) [GeoReM [4437] ]	samp. 31-1		TONGA ARC / LAU BASIN / CENTRAL LAU SPREADING CENTER / PACIFIC OCEAN	VOLCANIC ROCK	BASALT	WHOLE ROCK	7	basin	1.21	7252.12			29.62	0.8	1.57	5.13		2.57	2.89	0.16	-19.323	-176.163	-19.323	-176.163
2008	[12975] TIAN LIYAN(2008) [GeoReM [4437] ]	samp. 28-2		TONGA ARC / LAU BASIN / CENTRAL LAU SPREADING CENTER / PACIFIC OCEAN	VOLCANIC ROCK	BASALT	WHOLE ROCK	7	basin	1.26	7551.8			20.97	2.27	3.2	9.21		2.3	2.71	0.15	-17.933	-175.887	-17.933	-175.887
2008	[12975] TIAN LIYAN(2008) [GeoReM [4437] ]	samp. 31-3		TONGA ARC / LAU BASIN / CENTRAL LAU SPREADING CENTER / PACIFIC OCEAN	VOLCANIC ROCK	BASALT	WHOLE ROCK	7	basin	1.28	7671.67			27.63	1.31	1.94	5.91		3.39	3.7	0.13	-18.62	-176.432	-18.62	-176.432
2008	[12975] TIAN LIYAN(2008) [GeoReM [4437] ]	samp. 30-1		TONGA ARC / LAU BASIN / CENTRAL LAU SPREADING CENTER / PACIFIC OCEAN	VOLCANIC ROCK	BASALT	WHOLE ROCK	7	basin	1.32	7911.41			40.17	1.59	2.52	6.94		3.96	4.04	0.11	-18.547	-176.512	-18.547	-176.512
2008	[12975] TIAN LIYAN(2008) [GeoReM [4437] ]	samp. 28-4		TONGA ARC / LAU BASIN / CENTRAL LAU SPREADING CENTER / PACIFIC OCEAN	VOLCANIC ROCK	BASALT	WHOLE ROCK	7	basin	1.42	8510.75			30.09	2.58	3.68	10.46		3.71	3.68	0.36	-17.933	-175.887	-17.933	-175.887
2008	[12975] TIAN LIYAN(2008) [GeoReM [4437] ]	samp. 13-2		TONGA ARC / LAU BASIN / CENTRAL LAU SPREADING CENTER / PACIFIC OCEAN	VOLCANIC ROCK	BASALT	WHOLE ROCK	7	basin	1.54	9229.97			35.63	2.88	4.48	12.99		6.08	6.3	0.3	-19.095	-176.53	-19.095	-176.53
2008	[12975] TIAN LIYAN(2008) [GeoReM [4437] ]	samp. 32-1		TONGA ARC / LAU BASIN / CENTRAL LAU SPREADING CENTER / PACIFIC OCEAN	VOLCANIC ROCK	BASALT	WHOLE ROCK	7	basin	1.88	11267.8			49.38	1.86	3.23	10.48		5.08	5.59	0.13	-18.86	-176.563	-18.86	-176.563
2008	[12975] TIAN LIYAN(2008) [GeoReM [4437] ]	samp. 33-1		TONGA ARC / LAU BASIN / CENTRAL LAU SPREADING CENTER / PACIFIC OCEAN	VOLCANIC ROCK	BASALT	WHOLE ROCK	7	basin	1.93	11567.4			30.88	1.05	2.13	6.74		3.29	3.53	0.18	-18.855	-176.585	-18.855	-176.585
2008	[12975] TIAN LIYAN(2008) [GeoReM [4437] ]	samp. 30-3		TONGA ARC / LAU BASIN / CENTRAL LAU SPREADING CENTER / PACIFIC OCEAN	VOLCANIC ROCK	BASALT	WHOLE ROCK	7	basin	1.99	11927			32.03	1.97	3.21	10.33		4.95	4.94	0.21	-19.29	-176.527	-19.29	-176.527
2008	[12975] TIAN LIYAN(2008) [GeoReM [4437] ]	samp. 36-1		TONGA ARC / LAU BASIN / CENTRAL LAU SPREADING CENTER / PACIFIC OCEAN	VOLCANIC ROCK	BASALT	WHOLE ROCK	7	basin	2.06	12346.6			28.58	4.53	3.98	10.83		3.66	3.75	0.28	-19.175	-176.552	-19.175	-176.552
2012	[16253] JENNER F. E. (2012)	samp. NLD64		TONGA ARC / LAU BASIN / CENTRAL LAU SPREADING CENTER / PACIFIC OCEAN	VOLCANIC ROCK	BASALT	WHOLE ROCK	7	basin	0.844879	5063.77	48.0611	288.755	21.0771	0.79542	1.27748	4.14947	2.88624	2.52937	2.54009	0.0596754	-18.12	-176.36	-18.12	-176.36
2012	[16253] JENNER F. E. (2012)	samp. NLD65		TONGA ARC / LAU BASIN / CENTRAL LAU SPREADING CENTER / PACIFIC OCEAN	VOLCANIC ROCK	BASALT	WHOLE ROCK	7	basin	0.855	5124.44	47.5802	301.876	21.3015	0.804079	1.2822	4.08035	2.74192	2.41379	2.56112	0.0636973	-18.03	-176.32	-18.03	-176.32
2012	[16253] JENNER F. E. (2012)	samp. NLD59		TONGA ARC / LAU BASIN / CENTRAL LAU SPREADING CENTER / PACIFIC OCEAN	VOLCANIC ROCK	BASALT	WHOLE ROCK	7	basin	1.0324	6187.65	49.1631	275.933	26.3037	0.982732	1.60477	5.3009	3.5293	2.88458	2.90661	0.0794597	-18.39	-176.34	-18.39	-176.34
2012	[16253] JENNER F. E. (2012)	samp. NLD58		TONGA ARC / LAU BASIN / CENTRAL LAU SPREADING CENTER / PACIFIC OCEAN	VOLCANIC ROCK	BASALT	WHOLE ROCK	7	basin	1.12015	6713.59	51.4147	322.97	27.5821	0.921159	1.44227	4.84374	3.72914	2.9745	2.93676	0.0711857	-18.49	-176.39	-18.49	-176.39
2012	[16253] JENNER F. E. (2012)	samp. NLD66		TONGA ARC / LAU BASIN / CENTRAL LAU SPREADING CENTER / PACIFIC OCEAN	VOLCANIC ROCK	BASALT	WHOLE ROCK	7	basin	1.14146	6841.3	44.0893	337.98	26.0406	1.48113	2.02172	6.12847	3.62952	3.23465	3.27471	0.118158	-17.94	-176.36	-17.94	-176.36
1992	[3336] FALLOON T. J. (1992)	samp. M-2231-3	14324-M-2231-3	TONGA ARC / LAU BASIN / CENTRAL LAU SPREADING CENTER / PACIFIC OCEAN	VOLCANIC ROCK	BASALT	WHOLE ROCK	7	basin	1.24	7431.93	53	337.5	33.6	1.3	2.01	7.57			3.22	0.16	-18.6225	-176.435	-18.6225	-176.435
2008	[12975] TIAN LIYAN(2008) [GeoReM [4437] ]	samp. 5-8		TONGA ARC / LAU BASIN / EASTERN LAU SPREADING CENTER / PACIFIC OCEAN	VOLCANIC ROCK	BASALT	WHOLE ROCK	7	basin	0.89	5334.21			19.94	0.63	1.15	3.89		1.97	2.29	0.06	-19.908	-176.058	-19.908	-176.058
2008	[12975] TIAN LIYAN(2008) [GeoReM [4437] ]	samp. 6-3		TONGA ARC / LAU BASIN / EASTERN LAU SPREADING CENTER / PACIFIC OCEAN	VOLCANIC ROCK	BASALT	WHOLE ROCK	7	basin	0.93	5573.94			11.48	0.48	1.51	4.91		1.55	1.53	0.24	-20.163	-176.067	-20.163	-176.067
2008	[12975] TIAN LIYAN(2008) [GeoReM [4437] ]	samp. 11-1		TONGA ARC / LAU BASIN / EASTERN LAU SPREADING CENTER / PACIFIC OCEAN	VOLCANIC ROCK	BASALT	WHOLE ROCK	7	basin	0.98	5873.62			18.14	0.71	1.46	4.76		1.91	2.04	0.13	-19.375	-176.985	-19.375	-176.985
2008	[12975] TIAN LIYAN(2008) [GeoReM [4437] ]	samp. 32-3		TONGA ARC / LAU BASIN / EASTERN LAU SPREADING CENTER / PACIFIC OCEAN	VOLCANIC ROCK	BASALT	WHOLE ROCK	7	basin	1.07	6413.03			29.86	0.64	2.32	7.05		3.69	4.19	0.09	-20.112	-176.155	-20.112	-176.155
2008	[12975] TIAN LIYAN(2008) [GeoReM [4437] ]	samp. 7-5		TONGA ARC / LAU BASIN / EASTERN LAU SPREADING CENTER / PACIFIC OCEAN	VOLCANIC ROCK	BASALT	WHOLE ROCK	7	basin	1.58	9469.71			34.87	1.73	2.87	9.58		3.71	3.77	0.16	-20.22	-176.11	-20.22	-176.11
1994	[3056] EWART A. (1994)	samp. 135-839B-13R-2,25-23		TONGA ARC / LAU BASIN / EASTERN LAU SPREADING CENTER / PACIFIC OCEAN	VOLCANIC ROCK	BASALT	WHOLE ROCK	7	basin	0.68	4075.57	47	304	13.4	0.39	1.97	5.18	2.34	1.77	1.7	0.19	-20.709	-176.775	-20.709	-176.775
1994	[3056] EWART A. (1994)	samp. 135-839B-38R-1,8-12		TONGA ARC / LAU BASIN / EASTERN LAU SPREADING CENTER / PACIFIC OCEAN	VOLCANIC ROCK	BASALT	WHOLE ROCK	7	basin	0.85	5094.47	39	350	19.2	0.28	2.22	6.08	2.81	1.88	1.9	0.13	-20.709	-176.775	-20.709	-176.775
1994	[3056] EWART A. (1994)	samp. 135-839B-35R-1,7-11		TONGA ARC / LAU BASIN / EASTERN LAU SPREADING CENTER / PACIFIC OCEAN	VOLCANIC ROCK	BASALT	WHOLE ROCK	7	basin	0.86	5154.4	47	362	18.1	0.3	2.44	5.47	2.48	1.89	1.81	0.12	-20.709	-176.775	-20.709	-176.775
1994	[3056] EWART A. (1994)	samp. 135-839B-30R-1,7-11		TONGA ARC / LAU BASIN / EASTERN LAU SPREADING CENTER / PACIFIC OCEAN	VOLCANIC ROCK	BASALT	WHOLE ROCK	7	basin	0.91	5454.08	39	361	19.6	0.76	3.19	8.27	2.74	1.92	1.78	0.23	-20.709	-176.775	-20.709	-176.775
1994	[3056] EWART A. (1994)	samp. 135-836A-3H-3,30-90		TONGA ARC / LAU BASIN / EASTERN LAU SPREADING CENTER / PACIFIC OCEAN	VOLCANIC ROCK	BASALT	WHOLE ROCK	7	basin	1.37	8211.08	43	427	28.1	1	2.91	9.05	4.27	3.25	3.1	0.1	-20.1416	-176.5	-20.1416	-176.5
1994	[3056] EWART A. (1994)	samp. 135-837B,3R-1,141-145		TONGA ARC / LAU BASIN / EASTERN LAU SPREADING CENTER / PACIFIC OCEAN	VOLCANIC ROCK	BASALT	WHOLE ROCK	7	basin	1.41	8450.82	34	335	36.2	1.84	4.79	12.9	5.59	4.26	4.43	0.41	-20.222	-176.823	-20.222	-176.823
1994	[3056] EWART A. (1994)	samp. 135-837B,5R-1,1-8		TONGA ARC / LAU BASIN / EASTERN LAU SPREADING CENTER / PACIFIC OCEAN	VOLCANIC ROCK	BASALT	WHOLE ROCK	7	basin	1.43	8570.69	34	333	33.9	1.93	4.9	13.3	5.78	4.36	4.52	0.36	-20.222	-176.823	-20.222	-176.823
1994	[3321] HERGT J. M. (1994)	samp. 135-838A-20H-1,50-110,1	26158-135-838A-20H-1, 50-110, 1	TONGA ARC / LAU BASIN / EASTERN LAU SPREADING CENTER / PACIFIC OCEAN	VOLCANIC ROCK	BASALT	WHOLE ROCK	7	basin	0.76	4555.05			50.6	0.51	2.48	8.03	7.11	5.2	4.98	0.1	-20.827	-176.89	-20.827	-176.89
1994	[3321] HERGT J. M. (1994)	samp. 135-836A-3H-CC,0-7,3	26155-135-836A-3H-CC, 0-7, 3	TONGA ARC / LAU BASIN / EASTERN LAU SPREADING CENTER / PACIFIC OCEAN	VOLCANIC ROCK	BASALT	WHOLE ROCK	7	basin	0.84	5034.53			20.2	0.41	1.63	4.96	2.63	1.94	1.87	0.05	-20.1416	-176.5	-20.1416	-176.5
1994	[3321] HERGT J. M. (1994)	samp. 135-836B-3R-1,47-52,4A	26156-135-836B-3R-1, 47-52, 4A	TONGA ARC / LAU BASIN / EASTERN LAU SPREADING CENTER / PACIFIC OCEAN	VOLCANIC ROCK	BASALT	WHOLE ROCK	7	basin	0.88	5274.27			19.6	0.46	1.65	4.93	2.63	1.97	1.85	0.05	-20.1417	-176.5	-20.1417	-176.5
1994	[3321] HERGT J. M. (1994)	samp. 135-836B-9M-1,97-102	26156-135-836B-9M-1, 97-102	TONGA ARC / LAU BASIN / EASTERN LAU SPREADING CENTER / PACIFIC OCEAN	VOLCANIC ROCK	BASALT	WHOLE ROCK	7	basin	1.09	6532.9			27.4	1.05	2.71	7.22	3.8	2.77	2.7	0.19	-20.1417	-176.5	-20.1417	-176.5
1994	[3321] HERGT J. M. (1994)	samp. 135-836A-3H-4,53-110,2	26155-135-836A-3H-4, 53-110, 2	TONGA ARC / LAU BASIN / EASTERN LAU SPREADING CENTER / PACIFIC OCEAN	VOLCANIC ROCK	BASALT	WHOLE ROCK	7	basin	1.11	6652.77			40.2	1.22	3.35	9.51	5.3	3.99	3.82	0.23	-20.1416	-176.5	-20.1416	-176.5
1994	[3321] HERGT J. M. (1994)	samp. 135-836A-3H-3,23-24,1	26155-135-836A-3H-3, 23-24, 1	TONGA ARC / LAU BASIN / EASTERN LAU SPREADING CENTER / PACIFIC OCEAN	VOLCANIC ROCK	BASALT	WHOLE ROCK	7	basin	1.22	7312.06			35	0.96	2.96	8.44	4.68	3.61	3.51	0.19	-20.1416	-176.5	-20.1416	-176.5
1994	[3321] HERGT J. M. (1994)	samp. 135-836A-3H-3,30-95,1	26155-135-836A-3H-3, 30-95, 1	TONGA ARC / LAU BASIN / EASTERN LAU SPREADING CENTER / PACIFIC OCEAN	VOLCANIC ROCK	BASALT	WHOLE ROCK	7	basin	1.26	7551.8			38	1.09	2.99	8.55	4.99	3.56	3.82	0.19	-20.1416	-176.5	-20.1416	-176.5
1994	[3321] HERGT J. M. (1994)	samp. 135-836B-6R-2,20-25,4B	26156-135-836B-6R-2, 20-25, 4B	TONGA ARC / LAU BASIN / EASTERN LAU SPREADING CENTER / PACIFIC OCEAN	VOLCANIC ROCK	BASALT	WHOLE ROCK	7	basin					16.5	0.31	1.29	3.98	2.34	1.69	1.51	0.05	-20.1417	-176.5	-20.1417	-176.5
1994	[3321] HERGT J. M. (1994)	samp. 135-836A-9X-1,54-58,4	26155-135-836A-9X-1, 54-58, 4	TONGA ARC / LAU BASIN / EASTERN LAU SPREADING CENTER / PACIFIC OCEAN	VOLCANIC ROCK	BASALT	WHOLE ROCK	7	basin					19.4	0.43	1.55	5.1	2.52	2.05	1.69	0.06	-20.1416	-176.5	-20.1416	-176.5
1994	[3321] HERGT J. M. (1994)	samp. 135-836A-9X-2,16-24,4	26155-135-836A-9X-2, 16-24, 4	TONGA ARC / LAU BASIN / EASTERN LAU SPREADING CENTER / PACIFIC OCEAN	VOLCANIC ROCK	BASALT	WHOLE ROCK	7	basin					19.9	0.42	1.61	5.28	2.72	2.07	1.87	0.06	-20.1416	-176.5	-20.1416	-176.5
1994	[3321] HERGT J. M. (1994)	samp. 135-836A-3H-3,33-43,1	26155-135-836A-3H-3,33-43	TONGA ARC / LAU BASIN / EASTERN LAU SPREADING CENTER / PACIFIC OCEAN	VOLCANIC ROCK	BASALT	WHOLE ROCK	7	basin					35.5	1.04	2.71	8.11	4.87	3.77	3.36	0.16	-20.1416	-176.5	-20.1416	-176.5
1994	[3321] HERGT J. M. (1994)	samp. 135-836B-7R-2,62-67,5	26156-135-836B-7R-2, 62-67, 5	TONGA ARC / LAU BASIN / EASTERN LAU SPREADING CENTER / PACIFIC OCEAN	VOLCANIC ROCK	BASALT	WHOLE ROCK	7	basin					27.8	1.14	2.65	7.7	3.71	3.02	2.63	0.21	-20.1417	-176.5	-20.1417	-176.5
1994	[3321] HERGT J. M. (1994)	samp. 135-836A-3H-4,88-100,2	26155-135-836A-3H-4, 88-100	TONGA ARC / LAU BASIN / EASTERN LAU SPREADING CENTER / PACIFIC OCEAN	VOLCANIC ROCK	BASALT	WHOLE ROCK	7	basin					37	1.22	3.15	9.11	4.8	4	3.6	0.23	-20.1416	-176.5	-20.1416	-176.5
1994	[3321] HERGT J. M. (1994)	samp. 135-837B-5R-1,86-92,1	26157-135-837B-5R-1, 86-92, 1	TONGA ARC / LAU BASIN / EASTERN LAU SPREADING CENTER / PACIFIC OCEAN	VOLCANIC ROCK	BASALT	WHOLE ROCK	7	basin					40.8	2.02	4.06	10.8	5.45	4.1	3.88	0.32	-20.222	-176.823	-20.222	-176.823
1994	[3321] HERGT J. M. (1994)	samp. 135-837B-4R-1,101-109,1	26157-135-837B-4R-1, 101-109, 1	TONGA ARC / LAU BASIN / EASTERN LAU SPREADING CENTER / PACIFIC OCEAN	VOLCANIC ROCK	BASALT	WHOLE ROCK	7	basin					40.5	1.94	3.93	11.1	5.33	4.18	3.82	0.33	-20.222	-176.823	-20.222	-176.823
1994	[3321] HERGT J. M. (1994)	samp. 135-837B-2R-1,59-63,1	26157-135-837B-2R-1, 59-63, 1	TONGA ARC / LAU BASIN / EASTERN LAU SPREADING CENTER / PACIFIC OCEAN	VOLCANIC ROCK	BASALT	WHOLE ROCK	7	basin					40.9	1.89	3.88	10.8	5.35	4.03	5.09	0.33	-20.222	-176.823	-20.222	-176.823
1992	[3336] FALLOON T. J. (1992)	samp. M-2239-2	14330-M-2239-2	TONGA ARC / LAU BASIN / EASTERN LAU SPREADING CENTER / PACIFIC OCEAN	VOLCANIC ROCK	BASALT	WHOLE ROCK	7	basin	1	5993.49	49	349.6	27.9	0.6	2.22	6.16	4.2	3.1	2.63	0.2	-19.514	-175.961	-19.514	-175.961
1997	[2495] TURNER SIMON P. (1997)	samp. 31461	39472-31461	TONGA ARC / LAU BASIN / NIUAFO^OU (GOODHOPE OR TIN CAN ISLAND) / NIUAFO^OU / PACIFIC OCEAN	VOLCANIC ROCK	BASALT	WHOLE ROCK	7	basin	1.33	7971.34	43	264	31	3.4	5.1	11.7			3.06	0.256	-15.6	-175.97	-15.6	-175.97
1997	[2495] TURNER SIMON P. (1997)	samp. 31462	39472-31462	TONGA ARC / LAU BASIN / NIUAFO^OU (GOODHOPE OR TIN CAN ISLAND) / NIUAFO^OU / PACIFIC OCEAN	VOLCANIC ROCK	BASALT	WHOLE ROCK	7	basin	1.35	8091.21	42	269	33	3.8	4.3	12.1			3.17	0.26	-15.6	-175.97	-15.6	-175.97
1997	[2495] TURNER SIMON P. (1997)	samp. 31463	39472-31463	TONGA ARC / LAU BASIN / NIUAFO^OU (GOODHOPE OR TIN CAN ISLAND) / NIUAFO^OU / PACIFIC OCEAN	VOLCANIC ROCK	BASALT	WHOLE ROCK	7	basin	1.42	8510.75	45	275	33	3.1	4.3	12.9			3.29	0.305	-15.6	-175.97	-15.6	-175.97
1997	[2495] TURNER SIMON P. (1997)	samp. 31479		TONGA ARC / LAU BASIN / NIUAFO^OU (GOODHOPE OR TIN CAN ISLAND) / NIUAFO^OU / PACIFIC OCEAN	VOLCANIC ROCK	BASALT	WHOLE ROCK	7	basin	1.47	8810.43	51	290	35	3.3	4.6	13.1			3.41	0.297	-15.6	-175.97	-15.6	-175.97
1997	[2495] TURNER SIMON P. (1997)	samp. 31477	39472-31477	TONGA ARC / LAU BASIN / NIUAFO^OU (GOODHOPE OR TIN CAN ISLAND) / NIUAFO^OU / PACIFIC OCEAN	VOLCANIC ROCK	BASALT	WHOLE ROCK	7	basin	1.53	9170.04	49	294	36	4.3	5.4	13.3			3.47	0.309	-15.6	-175.97	-15.6	-175.97
1977	[2770] EWART A. (1977)	samp. N111	10212-N111	TONGA ARC / LAU BASIN / NIUAFO^OU (GOODHOPE OR TIN CAN ISLAND) / NIUAFO^OU / PACIFIC OCEAN	VOLCANIC ROCK	BASALT	WHOLE ROCK	7	basin	1.37	8211.08		265	30	3.7	4.2	13	4.4	3.3	3	0.21	-15.6	-175.65	-15.6	-175.65
1994	[3056] EWART A. (1994)	samp. N107	10212-N107	TONGA ARC / LAU BASIN / NIUAFO^OU (GOODHOPE OR TIN CAN ISLAND) / NIUAFO^OU / PACIFIC OCEAN	VOLCANIC ROCK	BASALT	WHOLE ROCK	7	basin	1.78	10668.4	50	265	32	4.51	5.74	15.5	6.42	4.44	4.31	0.37	-15.6	-175.65	-15.6	-175.65
1998	[3371] EWART A. (1998)	samp. N111	10212-N111	TONGA ARC / LAU BASIN / NIUAFO^OU (GOODHOPE OR TIN CAN ISLAND) / NIUAFO^OU / PACIFIC OCEAN	VOLCANIC ROCK	BASALT	WHOLE ROCK	7	basin			45.6	288	32.9	3.53	4.21	12.1	4.32	3.12	3.05	0.329	-15.6	-175.65	-15.6	-175.65
1998	[3371] EWART A. (1998)	samp. N131	10212-N131	TONGA ARC / LAU BASIN / NIUAFO^OU (GOODHOPE OR TIN CAN ISLAND) / NIUAFO^OU / PACIFIC OCEAN	VOLCANIC ROCK	BASALT	WHOLE ROCK	7	basin			48.2	301	33.5	3.75	4.27	12.2	4.31	0.315	3.09	0.338	-15.6	-175.65	-15.6	-175.65
1998	[3371] EWART A. (1998)	samp. N107	10212-N107	TONGA ARC / LAU BASIN / NIUAFO^OU (GOODHOPE OR TIN CAN ISLAND) / NIUAFO^OU / PACIFIC OCEAN	VOLCANIC ROCK	BASALT	WHOLE ROCK	7	basin			46	300	41.1	4.68	5.56	15.86	5.4	3.91	3.76	0.444	-15.6	-175.65	-15.6	-175.65
2012	[16253] JENNER F. E. (2012)	samp. NLD42		TONGA ARC / LAU BASIN / NORTHWESTERN LAU SPREADING CENTER / PACIFIC OCEAN	VOLCANIC ROCK	BASALT	WHOLE ROCK	7	basin	1.0689	6406.44	48.138	334.912	25.7503	1.1086	1.25334	4.08461	3.5793	2.78717	2.82436	0.0918151	-15.8	-177.27	-15.8	-177.27
2012	[16253] JENNER F. E. (2012)	samp. NLD48		TONGA ARC / LAU BASIN / NORTHWESTERN LAU SPREADING CENTER / PACIFIC OCEAN	VOLCANIC ROCK	BASALT	WHOLE ROCK	7	basin	1.08324	6492.41	46.1854	337.931	24.994	1.25964	1.44418	4.75983	3.48296	2.65805	2.74053	0.101693	-15.8	-177.26	-15.8	-177.26
2012	[16253] JENNER F. E. (2012)	samp. NLD51		TONGA ARC / LAU BASIN / NORTHWESTERN LAU SPREADING CENTER / PACIFIC OCEAN	VOLCANIC ROCK	BASALT	WHOLE ROCK	7	basin	1.09916	6587.8	47.801	282.685	23.321	4.23653	3.94283	10.0693	3.50788	2.40858	2.46161	0.353985	-16.04	-177.58	-16.04	-177.58
2012	[16253] JENNER F. E. (2012)	samp. NLD40		TONGA ARC / LAU BASIN / NORTHWESTERN LAU SPREADING CENTER / PACIFIC OCEAN	VOLCANIC ROCK	BASALT	WHOLE ROCK	7	basin	1.18632	7110.2	46.2171	342.9	26.7076	2.32452	2.26763	6.255	3.69327	2.98408	2.98594	0.205865	-15.59	-177.1	-15.59	-177.1
2012	[16253] JENNER F. E. (2012)	samp. NLD50		TONGA ARC / LAU BASIN / NORTHWESTERN LAU SPREADING CENTER / PACIFIC OCEAN	VOLCANIC ROCK	BASALT	WHOLE ROCK	7	basin	1.18667	7112.29	45.9202	294.831	31.5935	5.94859	4.58452	12.1759	4.38291	3.31127	3.41598	0.586733	-15.99	-177.52	-15.99	-177.52
2012	[16253] JENNER F. E. (2012)	samp. NLD49		TONGA ARC / LAU BASIN / NORTHWESTERN LAU SPREADING CENTER / PACIFIC OCEAN	VOLCANIC ROCK	BASALT	WHOLE ROCK	7	basin	1.34901	8085.3	54.7199	382.686	31.1961	2.4187	2.32451	6.95785	4.2734	3.32947	3.38175	0.201142	-15.84	-177.32	-15.84	-177.32
2012	[16253] JENNER F. E. (2012)	samp. NLD38		TONGA ARC / LAU BASIN / NORTHWESTERN LAU SPREADING CENTER / PACIFIC OCEAN	VOLCANIC ROCK	BASALT	WHOLE ROCK	7	basin	1.57892	9463.24	44.2057	369.265	31.5849	3.36762	3.52016	9.95344	4.68977	3.52938	3.58036	0.286396	-15.73	-177.2	-15.73	-177.2
2012	[16253] JENNER F. E. (2012)	samp. NLD47		TONGA ARC / LAU BASIN / NORTHWESTERN LAU SPREADING CENTER / PACIFIC OCEAN	VOLCANIC ROCK	BASALT	WHOLE ROCK	7	basin	1.60446	9616.31	49.4585	423.714	35.5386	5.27436	4.42395	11.1195	5.09764	3.8915	3.97837	0.449004	-15.9	-177.37	-15.9	-177.37
2012	[16253] JENNER F. E. (2012)	samp. NLD43		TONGA ARC / LAU BASIN / NORTHWESTERN LAU SPREADING CENTER / PACIFIC OCEAN	VOLCANIC ROCK	BASALT	WHOLE ROCK	7	basin	1.65916	9944.16	50.268	427.887	36.4708	3.40033	3.45847	10.1222	5.0326	3.79275	4.004	0.294638	-15.8	-177.28	-15.8	-177.28
2012	[16253] JENNER F. E. (2012)	samp. NLD45		TONGA ARC / LAU BASIN / NORTHWESTERN LAU SPREADING CENTER / PACIFIC OCEAN	VOLCANIC ROCK	BASALT	WHOLE ROCK	7	basin	1.99169	11937.2	49.2726	533.193	46.6057	5.37658	4.64625	12.8093	6.56367	5.27505	5.25138	0.431596	-15.91	-177.42	-15.91	-177.42
2012	[16253] JENNER F. E. (2012)	samp. NLD44		TONGA ARC / LAU BASIN / NORTHWESTERN LAU SPREADING CENTER / PACIFIC OCEAN	VOLCANIC ROCK	BASALT	WHOLE ROCK	7	basin	2.22085	13310.6	49.4493	569.39	52.5716	8.65253	6.90881	17.5371	7.25416	5.67369	5.9028	0.74052	-15.96	-177.48	-15.96	-177.48
1976	[2771] GILL J. B. (1976)	samp. 106-1		TONGA ARC / LAU BASIN / PEGGY RIDGE / PACIFIC OCEAN	VOLCANIC ROCK	BASALT	WHOLE ROCK	7	basin	1.92	11507.5			17	4.6	4.6	12.3	3.2	2.3	2.2	0.4	-16	-177	-17	-179
2007	[10608] PEARCE J. A.(2007) [GeoReM [2940] ]	samp. 15-1-4	13114-15-1-4	TONGA ARC / LAU BASIN / CENTRAL LAU SPREADING CENTER / PACIFIC OCEAN	VOLCANIC ROCK	BASALT, THOLEIITIC	WHOLE ROCK	8	basin			45.2	337	30.7	1.07	1.79	6.32	3.76	3.16	3.19	0.06	-18.8833	-176.561	-18.8833	-176.561
2007	[10608] PEARCE J. A.(2007) [GeoReM [2940] ]	samp. 22-1-1	13116-22-1-1	TONGA ARC / LAU BASIN / CENTRAL LAU SPREADING CENTER / PACIFIC OCEAN	VOLCANIC ROCK	BASALT, THOLEIITIC	WHOLE ROCK	8	basin			41	311	26.9	0.86	1.66	4.95	3.13	2.83	2.78	0.085	-19.6883	-175.993	-19.6883	-175.993
2007	[10608] PEARCE J. A.(2007) [GeoReM [2940] ]	samp. 2218-1		TONGA ARC / LAU BASIN / MANGATOLU TRIPLE JUNCTION / PACIFIC OCEAN	VOLCANIC ROCK	BASALT, THOLEIITIC	WHOLE ROCK	8	basin	1.16	6952.45	22	168	29.9	2.41	3.52	10.18	3.63	2.9	2.97	0.35	-15.627	-174.818	-15.627	-174.818
2007	[10608] PEARCE J. A.(2007) [GeoReM [2940] ]	samp. 2218-8		TONGA ARC / LAU BASIN / MANGATOLU TRIPLE JUNCTION / PACIFIC OCEAN	VOLCANIC ROCK	BASALT, THOLEIITIC	WHOLE ROCK	8	basin	1.26	7551.8	20.5	314	32	3.46	4.41	12.2	3.92	3.11	3.04	0.43	-15.6138	-174.816	-15.6138	-174.816
2007	[10608] PEARCE J. A.(2007) [GeoReM [2940] ]	samp. 16-151-3		TONGA ARC / LAU BASIN / VALU FA RIDGE / PACIFIC OCEAN	VOLCANIC ROCK	BASALT, THOLEIITIC	WHOLE ROCK	8	basin	0.97	5813.68	41	344	18.8	0.63	2.4	7.04	3.02	2.05	2	0.12	-22.08	-176.57	-22.5	-176.7
2007	[10608] PEARCE J. A.(2007) [GeoReM [2940] ]	samp. 16-151-1		TONGA ARC / LAU BASIN / VALU FA RIDGE / PACIFIC OCEAN	VOLCANIC ROCK	BASALT, THOLEIITIC	WHOLE ROCK	8	basin	1.11	6652.77	43.5	517	19.4	0.48	1.92	5.71	2.48	2	2	0.12	-22.08	-176.57	-22.5	-176.7
2008	[12000] REGELOUS M.(2008) [GeoReM [4329] ]	samp. T079		TONGA ARC / LAU BASIN / NIUAFO^OU (GOODHOPE OR TIN CAN ISLAND) / NIUAFO^OU / PACIFIC OCEAN	VOLCANIC ROCK	THOLEIITE	WHOLE ROCK	8	basin	1.03	6173.29	35	197	20.8	2.64	3.5	9.85	3.4	2.39	2.29	0.244	-15.6	-175.65	-15.6	-175.65
2008	[12000] REGELOUS M.(2008) [GeoReM [4329] ]	samp. T083		TONGA ARC / LAU BASIN / NIUAFO^OU (GOODHOPE OR TIN CAN ISLAND) / NIUAFO^OU / PACIFIC OCEAN	VOLCANIC ROCK	THOLEIITE	WHOLE ROCK	8	basin	1.34	8031.28	42.2	241	26.1	3.1	4.2	11.7	4.15	3	2.89	0.282	-15.6	-175.65	-15.6	-175.65
2008	[12000] REGELOUS M.(2008) [GeoReM [4329] ]	samp. T081		TONGA ARC / LAU BASIN / NIUAFO^OU (GOODHOPE OR TIN CAN ISLAND) / NIUAFO^OU / PACIFIC OCEAN	VOLCANIC ROCK	THOLEIITE	WHOLE ROCK	8	basin	1.46	8750.49	47.3	264	27.6	3.38	4.12	12	4.44	3.24	3.07	0.302	-15.6	-175.65	-15.6	-175.65
2008	[12000] REGELOUS M.(2008) [GeoReM [4329] ]	samp. T078		TONGA ARC / LAU BASIN / NIUAFO^OU (GOODHOPE OR TIN CAN ISLAND) / NIUAFO^OU / PACIFIC OCEAN	VOLCANIC ROCK	THOLEIITE	WHOLE ROCK	8	basin	1.5	8990.23	46.5	270	28.9	3.86	4.65	13.2	4.74	3.35	3.32	0.34	-15.6	-175.65	-15.6	-175.65
2008	[12000] REGELOUS M.(2008) [GeoReM [4329] ]	samp. T082		TONGA ARC / LAU BASIN / NIUAFO^OU (GOODHOPE OR TIN CAN ISLAND) / NIUAFO^OU / PACIFIC OCEAN	VOLCANIC ROCK	THOLEIITE	WHOLE ROCK	8	basin	1.51	9050.17	47.4	273	29.4	3.7	4.55	13.1	4.71	3.42	3.27	0.329	-15.6	-175.65	-15.6	-175.65
2008	[12000] REGELOUS M.(2008) [GeoReM [4329] ]	samp. T084		TONGA ARC / LAU BASIN / NIUAFO^OU (GOODHOPE OR TIN CAN ISLAND) / NIUAFO^OU / PACIFIC OCEAN	VOLCANIC ROCK	THOLEIITE	WHOLE ROCK	8	basin	1.52	9110.1	47.4	274	29.9	3.66	4.7	13.5	4.77	3.45	3.28	0.328	-15.6	-175.65	-15.6	-175.65
2008	[12000] REGELOUS M.(2008) [GeoReM [4329] ]	samp. T080		TONGA ARC / LAU BASIN / NIUAFO^OU (GOODHOPE OR TIN CAN ISLAND) / NIUAFO^OU / PACIFIC OCEAN	VOLCANIC ROCK	THOLEIITE	WHOLE ROCK	8	basin	1.52	9110.1	46.9	272	29.5	3.86	4.77	13.5	4.76	3.44	3.26	0.342	-15.6	-175.65	-15.6	-175.65
2008	[12000] REGELOUS M.(2008) [GeoReM [4329] ]	samp. N108	10212-N108	TONGA ARC / LAU BASIN / NIUAFO^OU (GOODHOPE OR TIN CAN ISLAND) / NIUAFO^OU / PACIFIC OCEAN	VOLCANIC ROCK	THOLEIITE	WHOLE ROCK	8	basin	1.53	9170.04	45.9	265	28.9	3.46	4.46	12.9	4.63	3.33	3.18	0.311	-15.6	-175.65	-15.6	-175.65
2008	[12000] REGELOUS M.(2008) [GeoReM [4329] ]	samp. N110	10212-N110	TONGA ARC / LAU BASIN / NIUAFO^OU (GOODHOPE OR TIN CAN ISLAND) / NIUAFO^OU / PACIFIC OCEAN	VOLCANIC ROCK	THOLEIITE	WHOLE ROCK	8	basin	1.67	10009.1	46.7	280	31.4	3.96	4.96	14.2	5.04	3.6	3.46	0.363	-15.6	-175.65	-15.6	-175.65
2008	[12000] REGELOUS M.(2008) [GeoReM [4329] ]	samp. 31461	39472-31461	TONGA ARC / LAU BASIN / NIUAFO^OU (GOODHOPE OR TIN CAN ISLAND) / NIUAFO^OU / PACIFIC OCEAN	VOLCANIC ROCK	THOLEIITE	WHOLE ROCK	8	basin			43.2	254	29.6	3.25	4.03	11.7	4.51	3.17	3.07	0.256	-15.6	-175.97	-15.6	-175.97
2008	[12000] REGELOUS M.(2008) [GeoReM [4329] ]	samp. 31462	39472-31462	TONGA ARC / LAU BASIN / NIUAFO^OU (GOODHOPE OR TIN CAN ISLAND) / NIUAFO^OU / PACIFIC OCEAN	VOLCANIC ROCK	THOLEIITE	WHOLE ROCK	8	basin			44.5	261	30.1	3.35	4.1	11.94	4.5	3.25	3.11	0.26	-15.6	-175.97	-15.6	-175.97
2008	[12000] REGELOUS M.(2008) [GeoReM [4329] ]	samp. 31463	39472-31463	TONGA ARC / LAU BASIN / NIUAFO^OU (GOODHOPE OR TIN CAN ISLAND) / NIUAFO^OU / PACIFIC OCEAN	VOLCANIC ROCK	THOLEIITE	WHOLE ROCK	8	basin			45.4	267	31.3	3.49	4.23	12.4	4.74	3.36	3.22	0.305	-15.6	-175.97	-15.6	-175.97
2008	[12000] REGELOUS M.(2008) [GeoReM [4329] ]	samp. 31477	39472-31477	TONGA ARC / LAU BASIN / NIUAFO^OU (GOODHOPE OR TIN CAN ISLAND) / NIUAFO^OU / PACIFIC OCEAN	VOLCANIC ROCK	THOLEIITE	WHOLE ROCK	8	basin			47.6	284	32.8	3.98	4.53	13.1	4.98	3.55	3.4	0.309	-15.6	-175.97	-15.6	-175.97
Download from GEOROC - Geochemical Database
Date of Query: Tuesday	October 31	2017
Please note: There is a List of your Query Criteria at the End of this Sheet.
Complete references (see 'CITATION' column above) - note that serial numbers [#####] correspond to record numbers from the GEOROC database
[10608] PEARCE J. A., KEMPTON P. D., GILL J. B. ; HF-ND EVIDENCE FOR THE ORIGIN AND DISTRIBUTION OF MANTLE DOMAINS IN THE SW PACIFIC ; EARTH PLANET. SCI. LETT. 260 [2007] 98-114
[12000] REGELOUS M., TURNER SIMON P., FALLOON T. J., TAYLOR P., GAMBLE J. A., GREEN TREVOR H. ; MANTLE DYNAMICS AND MANTLE MELTING BENEATH NIUAFO^OU ISLAND AND THE NORTHERN LAU BACK-ARC BASIN ; CONTRIB. MINERAL. PETROL. 156 [2008] 103-118
[12535] KELLER N. S., ARCULUS R. J., HERMANN J., RICHARDS S. W. ; SUBMARINE BACK-ARC LAVA WITH ARC SIGNATURE: FONUALEI SPREADING CENTER, NORTHEAST LAU BASIN, TONGA ; J. GEOPHYS. RES. B113 [2008]
[12975] TIAN LIYAN, CASTILLO P. R., HAWKINS J. W. JR., HILTON D. R., HANAN B. B., PIETRUSZKA A. J. ; MAJOR AND TRACE ELEMENT AND SR-ND ISOTOPE SIGNATURES OF LAVAS FROM THE CENTRAL LAU BASIN: IMPLICATIONS FOR THE NATURE AND INFLUENCE OF SUBDUCTION COMPONENTS IN THE BACK-ARC MANTLE ; J. VOLCANOL. GEOTHERM. RES. 178 [2008] 657-670
[13463] BEZOS A., ESCRIG S., LANGMUIR C. H., MICHAEL P. J., ASIMOW P. D. ; ORIGINS OF CHEMICAL DIVERSITY OF BACK-ARC BASIN BASALTS: A SEGMENT-SCALE STUDY OF THE EASTERN LAU SPREADING CENTER ; J. GEOPHYS. RES. B114 [2009]
[15652] TODD E., GILL J. B., WYSOCZANSKI R. J., HERGT J. M., WRIGHT I. C., LEYBOURNE M. I., MORTIMER N. ; HF ISOTOPIC EVIDENCE FOR SMALL-SCALE HETEROGENEITY IN THE MODE OF MANTLE WEDGE ENRICHMENT: SOUTHERN HAVRE TROUGH AND SOUTH FIJI BASIN BACK ARCS ; GEOCHEMISTRY GEOPHYSICS GEOSYSTEMS 12 [2011]
[15742] TIAN LIYAN, CASTILLO P. R., HILTON D. R., HAWKINS J. W. JR., HANAN B. B., PIETRUSZKA A. J. ; MAJOR AND TRACE ELEMENT AND SR-ND ISOTOPE SIGNATURES OF THE NORTHERN LAU BASIN LAVAS: IMPLICATIONS FOR THE COMPOSITION AND DYNAMICS OF THE BACK-ARC BASIN MANTLE ; J. GEOPHYS. RES. B116 [2011]
[16253] JENNER F. E., ARCULUS R. J., MAVROGENES J. A., NEBEL O., HAURI E. H. ; CHALCOPHILE ELEMENT SYSTEMATICS IN VOLCANIC GLASSES FROM THE NORTHWESTERN LAU BASIN ; GEOCHEMISTRY GEOPHYSICS GEOSYSTEMS 13 [2012]
[2495] TURNER SIMON P., HAWKESWORTH C. J., ROGERS N. W., BARTLETT J., WORTHINGTON T. J., HERGT J. M., PEARCE J. A., SMITH I. E. M. ; 238U-230TH DISEQUILIBRIA MAGMA PETROGENESIS AND FLUX RATES BENEATH THE DEPLETED TONGA-KERMADEC ISLAND ARC ; GEOCHIM. COSMOCHIM. ACTA 61 [1997] 4855-4884
[2770] EWART A., BROTHERS R. N., MATEEN A. ; AN OUTLINE OF THE GEOLOGY AND GEOCHEMISTRY, AND THE POSSIBLE PETROGENETIC EVOLUTION OF THE VOLCANIC ROCKS OF THE TONGA-KERMADEC-NEW ZEALAND ISLAND ARC ; J. VOLCANOL. GEOTHERM. RES. 2 [1977] 205-250
[2771] GILL J. B. ; COMPOSITION AND AGE OF LAU BASIN AND RIDGE VOLCANIC ROCKS: IMPLICATIONS FOR EVOLUTION OF AN INTERARC BASIN AND REMNANT ARC ; BULL. GEOL. SOC. AM. 87 [1976] 1384-1395
[3056] EWART A., BRYAN W. B., CHAPPELL B. W., RUDNICK R. L. ; REGIONAL GEOCHEMISTRY OF THE LAU-TONGA ARC AND BACK-ARC SYSTEMS ; PROC. OCEAN DRILL. PROGRAM, SCIENT. RESULTS 135 [1994] 385-425
[3321] HERGT J. M., HAWKESWORTH C. J. ; PB, SR, AND ND ISOTOPIC EVOLUTION OF THE LAU BASIN: IMPLICATIONS FOR MANTLE DYNAMICS DURING BACKARC OPENING ; PROC. OCEAN DRILL. PROGRAM, SCIENT. RESULTS 135 [1994] 505-517
[3336] FALLOON T. J., MALAHOFF A., ZONENSHAIN L. P., BOGDANOV YU. A. ; PETROLOGY AND GEOCHEMISTRY OF BACK ARC BASIN BASALTS FROM LAU BASIN SPREADING RIDGES ; MINERAL. PETROL. 47 [1992] 1-35
[3371] EWART A., COLLERSON K. D., REGELOUS M., WENDT J. I., NIU YAOLING ; GEOCHEMICAL EVOLUTION WITHIN THE TONGA-KERMADEC-LAU ARC-BACK-ARC SYSTEMS: THE ROLE OF VARYING MANTLE WEDGE COMPOSITION IN SPACE AND TIME ; J. PETROL. 39 [1998] 331-368
[3924] BOESPFLUG X., DOSSO L., BOUGAULT H., JORON J.-L. ; TRACE ELEMENT AND ISOTOPIC (SR, ND) GEOCHEMISTRY OF VOLCANIC ROCKS FROM THE LAU BASIN ; GEOL. JB. D92 [1990] 503-516
[3927] HERGT J. M., FARLEY K. A. ; MAJOR ELEMENT, TRACE ELEMENT, AND ISOTOPE (PB, SR, AND ND) VARIATIONS IN SITE 834 BASALTS: IMPLICATIONS FOR THE INITIATION OF BACKARC OPENING ; PROC. OCEAN DRILL. PROGRAM, SCIENT. RESULTS 135 [1994] 471-486
[4279] PEATE D. W., KOKFELT T. F., HAWKESWORTH C. J., VAN CALSTEREN P. W., HERGT J. M., SIEMS D. F. ; U-SERIES ISOTOPE DATA ON LAU BASIN GLASSES: THE ROLE OF SUBDUCTION-RELATED FLUIDS DURING MELT GENERATION IN BACK-ARC BASINS ; J. PETROL. 42 [2001] 1449-1470
[6407] PEARCE J. A., ERNEWEIN M., BLOOMER S. H., PARSON L. M., MURTON B. J., JOHNSON L. E. ; GEOCHEMISTRY OF LAU BASIN VOLCANIC ROCKS: INFLUENCE OF RIDGE SEGMENTATION AND ARC PROXIMITY ; SPEC. PUBL. GEOL. SOC. LONDON 81 [1994] 53-75
[9804] FRETZDORFF S., SCHWARZ-SCHAMPERA U., GIBSON H. L., GARBE-SCHÖNBERG D., HAUFF F., STOFFERS P. ; HYDROTHERMAL ACTIVITY AND MAGMA GENESIS ALONG A PROPAGATING BACK-ARC BASIN: VALU FA RIDGE (SOUTHERN LAU BASIN) ; J. GEOPHYS. RES. B111 [2006]

## Sheet: Kermadec
Year	CITATION	SAMPLE NAME	LOCATION	ROCK TYPE	ROCK NAME	TYPE OF MATERIAL	kcode	Setting	TiO2	Ti	Sc	V	Y	Zr	Nb	La	Ce	Nd	Sm	Eu	Gd	Dy	Er	Yb	Lu	Hf	Th	LATITUDE (MIN.)	LONGITUDE (MIN.)	LATITUDE (MAX.)	LONGITUDE (MAX.)
2010	[14131] SMITH I. E. M. (2010)	samp. 14816	KERMADEC ARC / KERMADEC ISLANDS / RAOUL / RAOUL / BOAT COVE FORMATION - MEYER MEMBER / PACIFIC OCEAN	VOLCANIC ROCK	ANDESITE	WHOLE ROCK	1	arc	0.77	4614.99	26.8	186.2	37.5	72.3	1.5	3.8	14.5	8.25	2.81	0.98	4.02	5.05		3.09	0.48		0.3	-29.25	-177.87	-29.25	-177.87
2010	[14131] SMITH I. E. M. (2010)	samp. 7088	KERMADEC ARC / KERMADEC ISLANDS / RAOUL / RAOUL / HUTCHISON FORMATION / PACIFIC OCEAN	VOLCANIC ROCK	ANDESITE	WHOLE ROCK	1	arc	1.23	7371.99	44.9	325.8	40.5	80.4	2.2	5.1	11	11.03	3.55	1.24	4.61	5.41	3.15	2.99	0.5	2.5	0.8	-29.25	-177.87	-29.25	-177.87
2010	[14131] SMITH I. E. M. (2010)	samp. 7045	KERMADEC ARC / KERMADEC ISLANDS / RAOUL / RAOUL / HUTCHISON FORMATION / PACIFIC OCEAN	VOLCANIC ROCK	ANDESITE	WHOLE ROCK	1	arc	0.91	5454.08	33.7	88.4	46.1	70.9	1.7	5.5	12.4	9.67	3.38	1.23	5.13	6.42		3.78	0.62		0.3	-29.25	-177.87	-29.25	-177.87
2013	[17055] BARKER S. J. (2013)	samp. D22_03_MB01	KERMADEC ARC / KERMADEC ISLANDS / RAOUL / RAOUL / PACIFIC OCEAN	VOLCANIC ROCK	ANDESITE	WHOLE ROCK	1	arc	0.577459	3461	36.8317	240.126	19.7854	31.0373	0.464456	1.86699	5.11925	4.74248	1.66693	0.662592	2.3616	3.20717	2.16695	2.26494	0.358886	1.06986	0.250319	-29.25	-177.92	-29.25	-177.92
1998	[3371] EWART A. (1998)	samp. 23386	KERMADEC ARC / KERMADEC ISLANDS / RAOUL / RAOUL / MOUMOUKAI FORMATION - FISHING ROCK MEMBER / PACIFIC OCEAN	VOLCANIC ROCK	ANDESITE	WHOLE ROCK	1	arc			31.7	273	23.6	29.2	0.3	1.63	4.95	5.41	2	0.74	2.78	3.54	2.31	2.4	0.373	0.932	0.191	-29.25	-177.87	-29.25	-177.87
1998	[3371] EWART A. (1998)	samp. 14864	KERMADEC ARC / KERMADEC ISLANDS / CURTIS / PACIFIC OCEAN	VOLCANIC ROCK	ANDESITE	WHOLE ROCK	1	arc			21.6	92.7	35	71.2	0.65	4.34	12.1	10.9	3.71	1.09	4.44	5.34	3.45	3.56	0.541	2.13	0.738	-30.58	-178.6	-30.58	-178.6
2010	[14131] SMITH I. E. M. (2010)	samp. 7145	KERMADEC ARC / KERMADEC ISLANDS / RAOUL / RAOUL / BOAT COVE FORMATION - WILSON MEMBER / PACIFIC OCEAN	VOLCANIC ROCK	ANDESITE, BASALTIC	WHOLE ROCK	2	arc	0.75	4495.12	38.6	342.4	23.8	49.9	1.4	1.7	4.6	5.94	2.15	0.69	2.9	3.41	1.93	1.63	0.25		0.8	-29.25	-177.87	-29.25	-177.87
2010	[14131] SMITH I. E. M. (2010)	samp. 14790	KERMADEC ARC / KERMADEC ISLANDS / HERALD / HERALD / BOAT COVE FORMATION / PACIFIC OCEAN	VOLCANIC ROCK	ANDESITE, BASALTIC	WHOLE ROCK	2	arc	0.74	4435.18	40.5	334.7	24.2	51.9	1.6	4.1	6.2	5.64	2.02	0.67	2.61	3.12	1.85	1.78	0.29		0.3	-29.25	-177.87	-29.25	-177.87
2010	[14131] SMITH I. E. M. (2010)	samp. 46359	KERMADEC ARC / KERMADEC ISLANDS / RAOUL / RAOUL / MOUMOUKAI FORMATION - FISHING ROCK MEMBER / PACIFIC OCEAN	VOLCANIC ROCK	ANDESITE, BASALTIC	WHOLE ROCK	2	arc	0.71	4255.38	30.3	299.2	24.5	38	1.5	5.4	9.1	6.06	2.03	0.76	2.97	3.53	2.14	2.04	0.32		0.1	-29.25	-177.87	-29.25	-177.87
2010	[14131] SMITH I. E. M. (2010)	samp. 46362	KERMADEC ARC / KERMADEC ISLANDS / RAOUL / RAOUL / MOUMOUKAI FORMATION - FISHING ROCK MEMBER / PACIFIC OCEAN	VOLCANIC ROCK	ANDESITE, BASALTIC	WHOLE ROCK	2	arc	0.71	4255.38	33	295.8	24.6	37.7	1.3	2	9.9	5.55	2.03	0.76	2.96	3.44	2.18	2.09	0.35	1.3	0.2	-29.25	-177.87	-29.25	-177.87
2010	[14131] SMITH I. E. M. (2010)	samp. 46372	KERMADEC ARC / KERMADEC ISLANDS / RAOUL / RAOUL / MOUMOUKAI FORMATION - FISHING ROCK MEMBER / PACIFIC OCEAN	VOLCANIC ROCK	ANDESITE, BASALTIC	WHOLE ROCK	2	arc	0.69	4135.51	30.9	267.6	24.6	37.8	1.4	0.7	11.1	5.74	2	0.76	3	3.56	2.29	2.18	0.35		0.1	-29.25	-177.87	-29.25	-177.87
2010	[14131] SMITH I. E. M. (2010)	samp. 46361	KERMADEC ARC / KERMADEC ISLANDS / RAOUL / RAOUL / MOUMOUKAI FORMATION - FISHING ROCK MEMBER / PACIFIC OCEAN	VOLCANIC ROCK	ANDESITE, BASALTIC	WHOLE ROCK	2	arc	0.71	4255.38	33.4	305.3	24.6	37.7	1.4	1.9	8.5	5.96	2.09	0.77	3.02	3.51	2.16	2.09	0.35		1.3	-29.25	-177.87	-29.25	-177.87
2010	[14131] SMITH I. E. M. (2010)	samp. 46360	KERMADEC ARC / KERMADEC ISLANDS / RAOUL / RAOUL / MOUMOUKAI FORMATION - FISHING ROCK MEMBER / PACIFIC OCEAN	VOLCANIC ROCK	ANDESITE, BASALTIC	WHOLE ROCK	2	arc	0.71	4255.38	29.8	295.9	24.7	38.8	1.1	1.9	4	5.58	1.98	0.75	2.98	3.5	2.13	2.07	0.34		1.4	-29.25	-177.87	-29.25	-177.87
2010	[14131] SMITH I. E. M. (2010)	samp. 7090	KERMADEC ARC / KERMADEC ISLANDS / RAOUL / RAOUL / HUTCHISON FORMATION / PACIFIC OCEAN	VOLCANIC ROCK	ANDESITE, BASALTIC	WHOLE ROCK	2	arc	1.01	6053.42	49.4	562.8	24.7	44.2	1.1	4	6.7	6.3	2.19	0.81	3.02	3.65	2.19	2.12	0.34	1.4	1.2	-29.25	-177.87	-29.25	-177.87
2010	[14131] SMITH I. E. M. (2010)	samp. 7096	KERMADEC ARC / KERMADEC ISLANDS / RAOUL / RAOUL / MOUMOUKAI FORMATION - FISHING ROCK MEMBER / PACIFIC OCEAN	VOLCANIC ROCK	ANDESITE, BASALTIC	WHOLE ROCK	2	arc	0.72	4315.31	28.5	305.1	24.8	38.4	1.3	1.3	7.5	5.67	2.01	0.79	2.92	3.62	2.16	2.1	0.32	1.3	0.2	-29.25	-177.87	-29.25	-177.87
2010	[14131] SMITH I. E. M. (2010)	samp. 7093	KERMADEC ARC / KERMADEC ISLANDS / RAOUL / RAOUL / MOUMOUKAI FORMATION - BLUE LAKE MEMBER / PACIFIC OCEAN	VOLCANIC ROCK	ANDESITE, BASALTIC	WHOLE ROCK	2	arc	0.72	4315.31	31.5	300.3	24.9	38.3	1.6	2.7	6.2	5.45	1.98	0.74	2.85	3.54	2.09	2.01	0.31		0.4	-29.25	-177.87	-29.25	-177.87
2010	[14131] SMITH I. E. M. (2010)	samp. 23388	KERMADEC ARC / KERMADEC ISLANDS / RAOUL / RAOUL / MOUMOUKAI FORMATION - FISHING ROCK MEMBER / PACIFIC OCEAN	VOLCANIC ROCK	ANDESITE, BASALTIC	WHOLE ROCK	2	arc	0.71	4255.38	34.9	298.5	25	37.6	1.1	2	7.9	5.24	1.79	0.74	2.76	3.3	1.99	1.86	0.32		0.1	-29.25	-177.87	-29.25	-177.87
2010	[14131] SMITH I. E. M. (2010)	samp. 46373	KERMADEC ARC / KERMADEC ISLANDS / RAOUL / RAOUL / MOUMOUKAI FORMATION - FISHING ROCK MEMBER / PACIFIC OCEAN	VOLCANIC ROCK	ANDESITE, BASALTIC	WHOLE ROCK	2	arc	0.71	4255.38	25.6	295.4	25.1	38.3	1.2	2.8	6.3	5.51	2.21	0.77	3.02	3.59	2.21	2.24	0.35		0.2	-29.25	-177.87	-29.25	-177.87
2010	[14131] SMITH I. E. M. (2010)	samp. 23386	KERMADEC ARC / KERMADEC ISLANDS / RAOUL / RAOUL / MOUMOUKAI FORMATION - FISHING ROCK MEMBER / PACIFIC OCEAN	VOLCANIC ROCK	ANDESITE, BASALTIC	WHOLE ROCK	2	arc	0.71	4255.38	30.2	268.9	25.4	37.7	1.5	2.7	9.1	5.38	2.06	0.76	2.8	3.64		2.09	0.34		0.6	-29.25	-177.87	-29.25	-177.87
2010	[14131] SMITH I. E. M. (2010)	samp. 46368	KERMADEC ARC / KERMADEC ISLANDS / RAOUL / RAOUL / MOUMOUKAI FORMATION - FISHING ROCK MEMBER / PACIFIC OCEAN	VOLCANIC ROCK	ANDESITE, BASALTIC	WHOLE ROCK	2	arc	0.7	4195.44	32.3	266.7	26.2	38.2	1.3	2.1	11.6	5.57	2.08	0.77	3.01	3.72	2.28	2.26	0.39	1.2	0.1	-29.25	-177.87	-29.25	-177.87
2010	[14131] SMITH I. E. M. (2010)	samp. 7115	KERMADEC ARC / KERMADEC ISLANDS / RAOUL / RAOUL / D^ARCY FORMATION / PACIFIC OCEAN	VOLCANIC ROCK	ANDESITE, BASALTIC	WHOLE ROCK	2	arc	1.03	6173.29	46.5	521.7	26.3	45	1.4	1.4	8.7	6.45	2.24	0.82	3.19	3.7	2.18	1.92	0.3		0.1	-29.25	-177.87	-29.25	-177.87
2010	[14131] SMITH I. E. M. (2010)	samp. 7002	KERMADEC ARC / KERMADEC ISLANDS / RAOUL / RAOUL / PACIFIC OCEAN	VOLCANIC ROCK	ANDESITE, BASALTIC	WHOLE ROCK	2	arc	0.99	5933.55	42.8	436	26.7	46.4	1.4	1.7	7.1	6.2	2.23	0.82	3.14	3.72	2.29	2.18	0.34		0.6	-29.25	-177.87	-29.25	-177.87
2010	[14131] SMITH I. E. M. (2010)	samp. 7053	KERMADEC ARC / KERMADEC ISLANDS / RAOUL / RAOUL / D^ARCY FORMATION / PACIFIC OCEAN	VOLCANIC ROCK	ANDESITE, BASALTIC	WHOLE ROCK	2	arc	1.04	6233.23	46.1	383.8	27.8	50.4	1.5	4.8	9.8	7.11	2.42	0.89	3.21	3.83	2.32	2.15	0.36	1.5	0.2	-29.25	-177.87	-29.25	-177.87
2010	[14131] SMITH I. E. M. (2010)	samp. 23369	KERMADEC ARC / KERMADEC ISLANDS / RAOUL / RAOUL / HUTCHISON FORMATION / PACIFIC OCEAN	VOLCANIC ROCK	ANDESITE, BASALTIC	WHOLE ROCK	2	arc	1.04	6233.23	49.8	509.9	28	49.4	1.4	1.2	8.2	6.63	2.48	0.86	3.22	4.21		2.22	0.34		0.4	-29.25	-177.87	-29.25	-177.87
2010	[14131] SMITH I. E. M. (2010)	samp. 46358	KERMADEC ARC / KERMADEC ISLANDS / RAOUL / RAOUL / JUDITH FORMATION / PACIFIC OCEAN	VOLCANIC ROCK	ANDESITE, BASALTIC	WHOLE ROCK	2	arc	0.97	5813.68	45.9	361	30.3	60.6	1.7	6.2	12.5	8.76	2.62	0.95	3.47	4.02	2.56	2.49	0.37	1.3	0.2	-29.25	-177.87	-29.25	-177.87
2010	[14131] SMITH I. E. M. (2010)	samp. 23384	KERMADEC ARC / KERMADEC ISLANDS / RAOUL / RAOUL / BOAT COVE FORMATION - MEYER MEMBER / PACIFIC OCEAN	VOLCANIC ROCK	ANDESITE, BASALTIC	WHOLE ROCK	2	arc	0.75	4495.12	37.6	338.2	32.2	54.8	1.3	2.4	7.7	6.94	2.28	0.77	3.27	4.05	2.42	2.24	0.36		0.5	-29.25	-177.87	-29.25	-177.87
1977	[2770] EWART A. (1977)	samp. 14840	KERMADEC ARC / KERMADEC ISLANDS / L^ESPERANCE / PACIFIC OCEAN	VOLCANIC ROCK	ANDESITE, BASALTIC	WHOLE ROCK	2	arc	1	5993.49		315	18	40	0.76	3.2	9.4	7.3	2.1	0.82	2.8	3.3	2.2	2.1	0.34	1.1	0.44	-31.43	-178.9	-31.43	-178.9
1994	[3056] EWART A. (1994)	samp. 23376	KERMADEC ARC / KERMADEC ISLANDS / RAOUL / RAOUL / D^ARCY FORMATION - SUNSHINE MEMBER / PACIFIC OCEAN	VOLCANIC ROCK	ANDESITE, BASALTIC	WHOLE ROCK	2	arc	0.64	3835.83	47	301	16.1	44.9	0.46	2.71	7.01	5.84	1.94	0.66	2.53	2.96	1.84	1.95	0.32	1.27	0.31	-29.25	-177.87	-29.25	-177.87
1994	[3056] EWART A. (1994)	samp. 14837	KERMADEC ARC / KERMADEC ISLANDS / L^ESPERANCE / PACIFIC OCEAN	VOLCANIC ROCK	ANDESITE, BASALTIC	WHOLE ROCK	2	arc	1.01	6053.42	42	360	20	45	0.41	3.12	7.87	6.79	2.31	0.9	2.9	0.59	2.31	2.42	0.39	1.28	0.51	-31.43	-178.9	-31.43	-178.9
1998	[3371] EWART A. (1998)	samp. 14775	KERMADEC ARC / KERMADEC ISLANDS / RAOUL / RAOUL / PACIFIC OCEAN	VOLCANIC ROCK	ANDESITE, BASALTIC	WHOLE ROCK	2	arc			36.9	329	16.5	28.6	0.35	1.12	3.92	3.7	1.44	0.529	1.9	2.32	1.55	1.51	0.229	0.76	0.161	-29.25	-177.87	-29.25	-177.87
1998	[3371] EWART A. (1998)	samp. 14796	KERMADEC ARC / KERMADEC ISLANDS / RAOUL / RAOUL / PACIFIC OCEAN	VOLCANIC ROCK	ANDESITE, BASALTIC	WHOLE ROCK	2	arc			38.3	299	16.8	31	0.29	1.5	5.04	4.57	1.67	0.647	2.36	2.88	1.89	1.94	0.294	1.1	0.255	-29.25	-177.87	-29.25	-177.87
1998	[3371] EWART A. (1998)	samp. 14837	KERMADEC ARC / KERMADEC ISLANDS / L^ESPERANCE / PACIFIC OCEAN	VOLCANIC ROCK	ANDESITE, BASALTIC	WHOLE ROCK	2	arc			38.7	356	16.9	28.8	0.4	2.73	7.63	6.21	1.92	0.803	2.45	2.79	1.78	1.73	0.26	0.9	0.504	-31.43	-178.9	-31.43	-178.9
1998	[3371] EWART A. (1998)	samp. 23374	KERMADEC ARC / KERMADEC ISLANDS / RAOUL / RAOUL / BOAT COVE FORMATION - WILSON MEMBER / PACIFIC OCEAN	VOLCANIC ROCK	ANDESITE, BASALTIC	WHOLE ROCK	2	arc			47.6	307	17.4	30.6	0.28	1.54	4.49	4.23	1.54	0.541	2.09	2.6	1.66	1.7	0.265	0.866	0.249	-29.25	-177.87	-29.25	-177.87
1998	[3371] EWART A. (1998)	samp. 23376	KERMADEC ARC / KERMADEC ISLANDS / RAOUL / RAOUL / D^ARCY FORMATION - SUNSHINE MEMBER / PACIFIC OCEAN	VOLCANIC ROCK	ANDESITE, BASALTIC	WHOLE ROCK	2	arc			42.8	286	17.9	38.2	0.5	2.61	7.12	5.84	1.93	0.646	2.38	2.7	1.73	1.76	0.272	1.05	0.382	-29.25	-177.87	-29.25	-177.87
1998	[3371] EWART A. (1998)	samp. 14790	KERMADEC ARC / KERMADEC ISLANDS / RAOUL / RAOUL / PACIFIC OCEAN	VOLCANIC ROCK	ANDESITE, BASALTIC	WHOLE ROCK	2	arc			36.7	294	19.4	39.7	0.37	1.84	5.92	5.38	1.94	0.689	2.66	3.26	2.18	2.2	0.337	1.34	0.282	-29.25	-177.87	-29.25	-177.87
1998	[3371] EWART A. (1998)	samp. 23383	KERMADEC ARC / KERMADEC ISLANDS / RAOUL / RAOUL / BOAT COVE FORMATION - MEYER MEMBER / PACIFIC OCEAN	VOLCANIC ROCK	ANDESITE, BASALTIC	WHOLE ROCK	2	arc			39.1	298	20.2	30.7	0.34	1.69	4.65	4.04	1.37	0.534	1.97	2.34	1.61	1.62	0.256	0.761	0.166	-29.25	-177.87	-29.25	-177.87
1998	[3371] EWART A. (1998)	samp. 14840	KERMADEC ARC / KERMADEC ISLANDS / L^ESPERANCE / PACIFIC OCEAN	VOLCANIC ROCK	ANDESITE, BASALTIC	WHOLE ROCK	2	arc			37.2	331	20.2	39.7	0.46	3.32	9.12	7.33	2.32	0.909	3.02	3.33	2.11	2.1	0.325	1.24	0.543	-31.43	-178.9	-31.43	-178.9
1998	[3371] EWART A. (1998)	samp. 14831	KERMADEC ARC / KERMADEC ISLANDS / L^ESPERANCE / PACIFIC OCEAN	VOLCANIC ROCK	ANDESITE, BASALTIC	WHOLE ROCK	2	arc			36.2	350	22.4	40.9	0.45	3.3	8.76	7.32	2.39	0.891	3	3.44	2.2	2.19	0.341	1.13	0.608	-31.43	-178.9	-31.43	-178.9
1998	[3371] EWART A. (1998)	samp. 14835	KERMADEC ARC / KERMADEC ISLANDS / L^ESPERANCE / PACIFIC OCEAN	VOLCANIC ROCK	ANDESITE, BASALTIC	WHOLE ROCK	2	arc			39	436	22.5	41.8	0.5	3.36	9.01	7.51	2.45	0.894	2.95	3.32	2.08	2.08	0.315	1.15	0.581	-31.43	-178.9	-31.43	-178.9
1998	[3371] EWART A. (1998)	samp. 14849	KERMADEC ARC / KERMADEC ISLANDS / CURTIS / PACIFIC OCEAN	VOLCANIC ROCK	ANDESITE, BASALTIC	WHOLE ROCK	2	arc			23.7	61.5	24.4	68.6	0.66	2.89	8.1	7.12	2.56	1.06	3.1	3.94	2.55	2.78	0.434	2.03	0.712	-30.58	-178.6	-30.58	-178.6
2007	[10608] PEARCE J. A.(2007) [GeoReM [2940] ]	samp. 14831	KERMADEC ARC / KERMADEC ISLANDS / L^ESPERANCE / PACIFIC OCEAN	VOLCANIC ROCK	ANDESITE, BASALTIC, THOLEIITIC	WHOLE ROCK	2	arc			39	436	22.4	40.9	0.45	3.3	8.76	7.32	2.39	0.89	3	3.44	2.2	2.19	0.34	1.13	0.61	-31.43	-178.9	-31.43	-178.9
2009	[13460] SMITH I. E. M. (2009)	samp. 7135	KERMADEC ARC / KERMADEC ISLANDS / RAOUL / RAOUL / PACIFIC OCEAN	VOLCANIC ROCK	BASALT	WHOLE ROCK	3	arc	0.56	3356.35	52.6	352.7	10	12.7	0.32	1.29	3.85	3.34	1.27	0.48	1.51	1.89	1.13	1.24	0.16	0.45	0.1	-29.25	-177.87	-29.25	-177.87
2009	[13460] SMITH I. E. M. (2009)	samp. 7114	KERMADEC ARC / KERMADEC ISLANDS / RAOUL / RAOUL / PACIFIC OCEAN	VOLCANIC ROCK	BASALT	WHOLE ROCK	3	arc	0.65	3895.77	35.3	377.6	12	21.9	0.42	1.54	4.53	4.11	1.44	0.57	1.76	2.28	1.48	1.57	0.2	0.77	0.18	-29.25	-177.87	-29.25	-177.87
2009	[13460] SMITH I. E. M. (2009)	samp. 7125	KERMADEC ARC / KERMADEC ISLANDS / RAOUL / RAOUL / PACIFIC OCEAN	VOLCANIC ROCK	BASALT	WHOLE ROCK	3	arc	0.72	4315.31	42.9	346.8	14.8	26	0.5	1.96	5.66	5.07	1.76	0.7	2.3	2.85	1.58	1.87	0.22	0.96	0.26	-29.25	-177.87	-29.25	-177.87
2009	[13460] SMITH I. E. M. (2009)	samp. 46357	KERMADEC ARC / KERMADEC ISLANDS / RAOUL / RAOUL / PACIFIC OCEAN	VOLCANIC ROCK	BASALT	WHOLE ROCK	3	arc	0.75	4495.12	36.3	350.1	17.3	37.9	0.7	3.31	9.03	7.48	2.54	0.93	2.84	3.22	1.98	2.11	0.33	1.55	0.37	-29.25	-177.87	-29.25	-177.87
2009	[13460] SMITH I. E. M. (2009)	samp. 7148	KERMADEC ARC / KERMADEC ISLANDS / RAOUL / RAOUL / BOAT COVE FORMATION - WILSON MEMBER / PACIFIC OCEAN	VOLCANIC ROCK	BASALT	WHOLE ROCK	3	arc	0.66	3955.7	40.6	334.4	18.1	33.1	0.39	1.7	5.18	5.08	1.82	0.73	2.6	3.07	1.85	2.25	0.29	1.39	0.22	-29.25	-177.87	-29.25	-177.87
2009	[13460] SMITH I. E. M. (2009)	samp. 46330	KERMADEC ARC / KERMADEC ISLANDS / RAOUL / RAOUL / PACIFIC OCEAN	VOLCANIC ROCK	BASALT	WHOLE ROCK	3	arc	0.92	5514.01	31.9	335.7	19.3	34.1	0.64	3.25	8.71	7.7	2.46	0.87	3.13	3.49	2.05	2.41	0.34	1.32	0.41	-29.25	-177.87	-29.25	-177.87
2009	[13460] SMITH I. E. M. (2009)	samp. 7090	KERMADEC ARC / KERMADEC ISLANDS / RAOUL / RAOUL / PACIFIC OCEAN	VOLCANIC ROCK	BASALT	WHOLE ROCK	3	arc	1.01	6053.42	35.8	461.4	19.4	28.4	0.54	2.35	6.69	5.98	2.21	0.88	3.05	3.08	1.89	2.32	0.37	1.45	0.24	-29.25	-177.87	-29.25	-177.87
2009	[13460] SMITH I. E. M. (2009)	samp. 46325	KERMADEC ARC / KERMADEC ISLANDS / RAOUL / RAOUL / PACIFIC OCEAN	VOLCANIC ROCK	BASALT	WHOLE ROCK	3	arc	1.02	6113.36	39.1	424	20	30.7	0.53	2.49	7	6.26	2.17	0.81	3.05	3.41	2.07	2.51	0.33	1.2	0.3	-29.25	-177.87	-29.25	-177.87
2009	[13460] SMITH I. E. M. (2009)	samp. 7053	KERMADEC ARC / KERMADEC ISLANDS / RAOUL / RAOUL / PACIFIC OCEAN	VOLCANIC ROCK	BASALT	WHOLE ROCK	3	arc	1.04	6233.23	35	365.8	21.2	34.4	0.55	2.71	7.66	6.95	2.5	0.98	3.12	3.98	2.41	2.76	0.38	1.46	0.22	-29.25	-177.87	-29.25	-177.87
2009	[13460] SMITH I. E. M. (2009)	samp. 7144	KERMADEC ARC / KERMADEC ISLANDS / RAOUL / RAOUL / BOAT COVE FORMATION - WILSON MEMBER / PACIFIC OCEAN	VOLCANIC ROCK	BASALT	WHOLE ROCK	3	arc	0.76	4555.05	38.9	344.2	22.2	37.4	0.52	2.34	6.33	6.44	2.41	0.91	3.18	3.84	2.25	2.74	0.34	1.55	0.29	-29.25	-177.87	-29.25	-177.87
2009	[13460] SMITH I. E. M. (2009)	samp. 46362	KERMADEC ARC / KERMADEC ISLANDS / RAOUL / RAOUL / PACIFIC OCEAN	VOLCANIC ROCK	BASALT	WHOLE ROCK	3	arc	0.71	4255.38	31.4	296.5	22.8	29	0.53	2.61	7.61	7.35	2.73	1.1	3.35	4.6	2.78	3.18	0.45	1.29	0.19	-29.25	-177.87	-29.25	-177.87
2009	[13460] SMITH I. E. M. (2009)	samp. 46329	KERMADEC ARC / KERMADEC ISLANDS / RAOUL / RAOUL / PACIFIC OCEAN	VOLCANIC ROCK	BASALT	WHOLE ROCK	3	arc	0.82	4914.66	41.7	351.4	24.5	43	1.99	3.07	8.68	7.72	2.63	1.02	3.45	3.96	2.31	2.67	0.41	1.49	0.29	-29.25	-177.87	-29.25	-177.87
2009	[13460] SMITH I. E. M. (2009)	samp. 7096	KERMADEC ARC / KERMADEC ISLANDS / RAOUL / RAOUL / PACIFIC OCEAN	VOLCANIC ROCK	BASALT	WHOLE ROCK	3	arc	0.72	4315.31	33.2	307.3	24.7	30.2	0.58	2.6	7.75	7.28	2.77	0.99	3.56	4.72	2.86	3.24	0.44	1.33	0.22	-29.25	-177.87	-29.25	-177.87
2009	[13460] SMITH I. E. M. (2009)	samp. 46368	KERMADEC ARC / KERMADEC ISLANDS / RAOUL / RAOUL / PACIFIC OCEAN	VOLCANIC ROCK	BASALT	WHOLE ROCK	3	arc	0.7	4195.44	32.5	279.1	25.3	28.9	0.46	2.48	7.34	7.55	2.75	1.07	3.67	4.8	3.02	3.53	0.48	1.22	0.15	-29.25	-177.87	-29.25	-177.87
2009	[13460] SMITH I. E. M. (2009)	samp. 46358	KERMADEC ARC / KERMADEC ISLANDS / RAOUL / RAOUL / PACIFIC OCEAN	VOLCANIC ROCK	BASALT	WHOLE ROCK	3	arc	0.97	5813.68	35.9	301.5	25.9	49.8	1.42	2.65	7.52	6.95	2.21	0.82	2.86	3.99	2.15	2.53	0.39	1.27	0.19	-29.25	-177.87	-29.25	-177.87
2009	[13460] SMITH I. E. M. (2009)	samp. 7088	KERMADEC ARC / KERMADEC ISLANDS / RAOUL / RAOUL / HUTCHISON FORMATION / PACIFIC OCEAN	VOLCANIC ROCK	BASALT	WHOLE ROCK	3	arc	1.23	7371.99	30.9	268.2	32.3	55.7	0.83	4.54	11.99	11.26	3.81	1.28	5.11	5.35	3.19	3.87	0.55	2.51	0.58	-29.25	-177.87	-29.25	-177.87
2010	[14131] SMITH I. E. M. (2010)	samp. 7135	KERMADEC ARC / KERMADEC ISLANDS / RAOUL / RAOUL / D^ARCY FORMATION - SUNSHINE MEMBER / PACIFIC OCEAN	VOLCANIC ROCK	BASALT	WHOLE ROCK	3	arc	0.56	3356.35	53.1	320.5	11.8	19.3	0.7	1.4	8	2.98	0.91	0.4	1.24	1.52	1.05	0.81	0.11	0.4	0.1	-29.25	-177.87	-29.25	-177.87
2010	[14131] SMITH I. E. M. (2010)	samp. 7114	KERMADEC ARC / KERMADEC ISLANDS / RAOUL / RAOUL / D^ARCY FORMATION / PACIFIC OCEAN	VOLCANIC ROCK	BASALT	WHOLE ROCK	3	arc	0.65	3895.77	36	357.9	13.3	23.6	0.8	1.1	4	3.26	1.07	0.48	1.44	1.82	1.26	1.04	0.16	0.8	0.2	-29.25	-177.87	-29.25	-177.87
2010	[14131] SMITH I. E. M. (2010)	samp. 7122	KERMADEC ARC / KERMADEC ISLANDS / RAOUL / RAOUL / D^ARCY FORMATION - SUNSHINE MEMBER / PACIFIC OCEAN	VOLCANIC ROCK	BASALT	WHOLE ROCK	3	arc	0.6	3596.09	45.4	280.1	14.6	27.8	1.1	1.31	5.2	3.34	1.21	0.44	1.83	2.07	1.28	1.18	0.19		0.2	-29.25	-177.87	-29.25	-177.87
2010	[14131] SMITH I. E. M. (2010)	samp. 23387	KERMADEC ARC / KERMADEC ISLANDS / RAOUL / RAOUL / MOUMOUKAI FORMATION - BLUE LAKE MEMBER / PACIFIC OCEAN	VOLCANIC ROCK	BASALT	WHOLE ROCK	3	arc	0.68	4075.57	39.5	356.3	15.8	32	1.5	1.6	7.5	5.21	1.6	0.57	1.97	2.24	1.45	1.08	0.19		0.5	-29.25	-177.87	-29.25	-177.87
2010	[14131] SMITH I. E. M. (2010)	samp. 7125	KERMADEC ARC / KERMADEC ISLANDS / RAOUL / RAOUL / D^ARCY FORMATION - SUNSHINE MEMBER / PACIFIC OCEAN	VOLCANIC ROCK	BASALT	WHOLE ROCK	3	arc	0.72	4315.31	40.7	321.4	16	32.8	1.2	3.1	6.8	4.08	1.38	0.52	1.94	2.29	1.45	1.29	0.19	1	0.3	-29.25	-177.87	-29.25	-177.87
2010	[14131] SMITH I. E. M. (2010)	samp. 46324	KERMADEC ARC / KERMADEC ISLANDS / RAOUL / RAOUL / HUTCHISON FORMATION / PACIFIC OCEAN	VOLCANIC ROCK	BASALT	WHOLE ROCK	3	arc	0.67	4015.64	32.7	278.6	16.8	31.2	1.3	2.7	8.5	4.58	1.55	0.53	2.11	2.45	1.49	1.35	0.21		0.2	-29.25	-177.87	-29.25	-177.87
2010	[14131] SMITH I. E. M. (2010)	samp. 46327	KERMADEC ARC / KERMADEC ISLANDS / RAOUL / RAOUL / HUTCHISON FORMATION / PACIFIC OCEAN	VOLCANIC ROCK	BASALT	WHOLE ROCK	3	arc	0.72	4315.31	40.3	386	18.1	33.3	1.3	2.3	4.3	4.57	1.54	0.57	2.32	2.77	1.66	1.58	0.25		0.3	-29.25	-177.87	-29.25	-177.87
2010	[14131] SMITH I. E. M. (2010)	samp. 7095	KERMADEC ARC / KERMADEC ISLANDS / RAOUL / RAOUL / MOUMOUKAI FORMATION - BLUE LAKE MEMBER / PACIFIC OCEAN	VOLCANIC ROCK	BASALT	WHOLE ROCK	3	arc	0.73	4375.25	40	328.3	18.2	37.9	1.4	1.6	6	5.56	1.81	0.64	2.18	2.54	1.42	1.36	0.2		0.3	-29.25	-177.87	-29.25	-177.87
2010	[14131] SMITH I. E. M. (2010)	samp. 23378	KERMADEC ARC / KERMADEC ISLANDS / RAOUL / RAOUL / BOAT COVE FORMATION - WILSON MEMBER / PACIFIC OCEAN	VOLCANIC ROCK	BASALT	WHOLE ROCK	3	arc	0.64	3835.83	47.1	332.3	18.3	35.9	0.9	2.8	8.5	3.83	1.54	0.54	1.96	2.6	1.47	1.41	0.22		0.3	-29.25	-177.87	-29.25	-177.87
2010	[14131] SMITH I. E. M. (2010)	samp. 7110	KERMADEC ARC / KERMADEC ISLANDS / RAOUL / RAOUL / D^ARCY FORMATION / PACIFIC OCEAN	VOLCANIC ROCK	BASALT	WHOLE ROCK	3	arc	0.69	4135.51	37.8	309.4	18.3	40.2	1.5	3.6	5.7	6.56	1.94	0.68	2.58	2.72	1.59	1.51	0.22		0.4	-29.25	-177.87	-29.25	-177.87
2010	[14131] SMITH I. E. M. (2010)	samp. 23374	KERMADEC ARC / KERMADEC ISLANDS / RAOUL / RAOUL / BOAT COVE FORMATION - WILSON MEMBER / PACIFIC OCEAN	VOLCANIC ROCK	BASALT	WHOLE ROCK	3	arc	0.6	3596.09	47.2	309.2	18.4	37.2	1	2.8	4.1	4.36	1.44	0.53	2.13	2.5	1.35	1.28	0.2		0.4	-29.25	-177.87	-29.25	-177.87
2010	[14131] SMITH I. E. M. (2010)	samp. 7123	KERMADEC ARC / KERMADEC ISLANDS / RAOUL / RAOUL / D^ARCY FORMATION - SUNSHINE MEMBER / PACIFIC OCEAN	VOLCANIC ROCK	BASALT	WHOLE ROCK	3	arc	0.6	3596.09	41.4	291.3	18.5	44.5	1.3	2.2	10.8	6.12	1.88	0.62	2.33	2.6	1.6	1.45	0.26		0.1	-29.25	-177.87	-29.25	-177.87
2010	[14131] SMITH I. E. M. (2010)	samp. 7127	KERMADEC ARC / KERMADEC ISLANDS / RAOUL / RAOUL / D^ARCY FORMATION - SUNSHINE MEMBER / PACIFIC OCEAN	VOLCANIC ROCK	BASALT	WHOLE ROCK	3	arc	0.56	3356.35	47.8	308.4	18.8	34.4	1.1	2.2	5	3.67	1.44	0.52	2.14	2.55	1.54	1.44	0.24		0.2	-29.25	-177.87	-29.25	-177.87
2010	[14131] SMITH I. E. M. (2010)	samp. 7148	KERMADEC ARC / KERMADEC ISLANDS / RAOUL / RAOUL / BOAT COVE FORMATION - WILSON MEMBER / PACIFIC OCEAN	VOLCANIC ROCK	BASALT	WHOLE ROCK	3	arc	0.66	3955.7	42.9	337.2	18.9	37.8	1.2	1.33	6	4.46	1.52	0.59	2.14	2.77	1.68	1.51	0.22	1.4	0.7	-29.25	-177.87	-29.25	-177.87
2010	[14131] SMITH I. E. M. (2010)	samp. 46357	KERMADEC ARC / KERMADEC ISLANDS / RAOUL / RAOUL / MOUMOUKAI FORMATION - BLUE LAKE MEMBER / PACIFIC OCEAN	VOLCANIC ROCK	BASALT	WHOLE ROCK	3	arc	0.75	4495.12	31.9	334.7	19	38.6	1.3	5.5	8.6	6.11	1.92	0.7	2.46	2.68	1.58	1.43	0.22	1.6	0.4	-29.25	-177.87	-29.25	-177.87
2010	[14131] SMITH I. E. M. (2010)	samp. 7146	KERMADEC ARC / KERMADEC ISLANDS / RAOUL / RAOUL / BOAT COVE FORMATION - WILSON MEMBER / PACIFIC OCEAN	VOLCANIC ROCK	BASALT	WHOLE ROCK	3	arc	0.7	4195.44	49.1	348.6	19.3	39.3	1.2	3	10.1	4.67	1.62	0.59	2.31	2.83	1.73	1.63	0.24		0.1	-29.25	-177.87	-29.25	-177.87
2010	[14131] SMITH I. E. M. (2010)	samp. 7140	KERMADEC ARC / KERMADEC ISLANDS / RAOUL / RAOUL / D^ARCY FORMATION / PACIFIC OCEAN	VOLCANIC ROCK	BASALT	WHOLE ROCK	3	arc	0.79	4734.86	31.2	337	19.4	38.9	1.3	4.2	7.7	5.54	1.8	0.68	2.68	2.99	1.86	1.75	0.26		0.2	-29.25	-177.87	-29.25	-177.87
2010	[14131] SMITH I. E. M. (2010)	samp. 7101	KERMADEC ARC / KERMADEC ISLANDS / RAOUL / RAOUL / MOUMOUKAI FORMATION - BLUE LAKE MEMBER / PACIFIC OCEAN	VOLCANIC ROCK	BASALT	WHOLE ROCK	3	arc	0.77	4614.99	36.6	340.9	19.5	37.7	1.7	2.4	7.6	5.59	1.87	0.66	2.52	2.86	1.8	1.63	0.26		0.2	-29.25	-177.87	-29.25	-177.87
2010	[14131] SMITH I. E. M. (2010)	samp. 7089	KERMADEC ARC / KERMADEC ISLANDS / RAOUL / RAOUL / HUTCHISON FORMATION / PACIFIC OCEAN	VOLCANIC ROCK	BASALT	WHOLE ROCK	3	arc	0.81	4854.73	31.2	291.2	19.6	40.3	1.1	2.7	7.7	6.42	1.86	0.69	2.5	2.78	1.51	1.47	0.25		1.1	-29.25	-177.87	-29.25	-177.87
2010	[14131] SMITH I. E. M. (2010)	samp. 23389	KERMADEC ARC / KERMADEC ISLANDS / RAOUL / RAOUL / D^ARCY FORMATION - SUNSHINE MEMBER / PACIFIC OCEAN	VOLCANIC ROCK	BASALT	WHOLE ROCK	3	arc	0.79	4734.86	46.3	378.5	20	36	1.4	3.1	6.9	5.17	1.49	0.63	2.41	2.8	1.61	1.44	0.25		0.1	-29.25	-177.87	-29.25	-177.87
2010	[14131] SMITH I. E. M. (2010)	samp. 7105	KERMADEC ARC / KERMADEC ISLANDS / RAOUL / RAOUL / HUTCHISON FORMATION / PACIFIC OCEAN	VOLCANIC ROCK	BASALT	WHOLE ROCK	3	arc	0.8	4794.79	47.1	377.6	20.2	36.9	1.2	2.3	5.3	5.07	1.79	0.66	2.56	3.03	1.82	1.84	0.26		1.2	-29.25	-177.87	-29.25	-177.87
2010	[14131] SMITH I. E. M. (2010)	samp. 46331	KERMADEC ARC / KERMADEC ISLANDS / RAOUL / RAOUL / MOUMOUKAI FORMATION / PACIFIC OCEAN	VOLCANIC ROCK	BASALT	WHOLE ROCK	3	arc	0.82	4914.66	36.9	371.9	20.4	39.1	1.7	0.4	5.9	5.83	1.95	0.68	2.47	2.94	1.82	1.66	0.25		0.8	-29.25	-177.87	-29.25	-177.87
2010	[14131] SMITH I. E. M. (2010)	samp. 14775	KERMADEC ARC / KERMADEC ISLANDS / HERALD / HERALD / BOAT COVE FORMATION / PACIFIC OCEAN	VOLCANIC ROCK	BASALT	WHOLE ROCK	3	arc	0.76	4555.05	43.4	373	21.5	39.9	1.3	3.5	7.4	4.49	1.61	0.62	2.4	3.05	1.9	1.7	0.26		1	-29.25	-177.87	-29.25	-177.87
2010	[14131] SMITH I. E. M. (2010)	samp. 7144	KERMADEC ARC / KERMADEC ISLANDS / RAOUL / RAOUL / BOAT COVE FORMATION - WILSON MEMBER / PACIFIC OCEAN	VOLCANIC ROCK	BASALT	WHOLE ROCK	3	arc	0.76	4555.05	39.1	345.9	22.6	44.2	1.2	3.3	6.5	4.95	1.8	0.67	2.49	3.11	1.81	1.71	0.3	1.5	0.5	-29.25	-177.87	-29.25	-177.87
2010	[14131] SMITH I. E. M. (2010)	samp. 46364	KERMADEC ARC / KERMADEC ISLANDS / RAOUL / RAOUL / MOUMOUKAI FORMATION - BLUE LAKE MEMBER / PACIFIC OCEAN	VOLCANIC ROCK	BASALT	WHOLE ROCK	3	arc	0.85	5094.47	40.5	354.1	22.6	47.3	1.5	2.3	9.9	7.17	2.4	0.81	3.04	3.36	1.91	1.88	0.31		1	-29.25	-177.87	-29.25	-177.87
2010	[14131] SMITH I. E. M. (2010)	samp. 14761	KERMADEC ARC / KERMADEC ISLANDS / HERALD / HERALD / BOAT COVE FORMATION / PACIFIC OCEAN	VOLCANIC ROCK	BASALT	WHOLE ROCK	3	arc	0.85	5094.47	33.5	373.4	23.3	51.7	1.4	3.2	10.1	6.6	2.19	0.77	2.74	3.3	1.97	1.82	0.26		0.2	-29.25	-177.87	-29.25	-177.87
2010	[14131] SMITH I. E. M. (2010)	samp. 7098	KERMADEC ARC / KERMADEC ISLANDS / RAOUL / RAOUL / MOUMOUKAI FORMATION - BLUE LAKE MEMBER / PACIFIC OCEAN	VOLCANIC ROCK	BASALT	WHOLE ROCK	3	arc	0.86	5154.4	47	386.6	23.7	48.5	1.4	2.5	9.4	7.17	2.41	0.79	3.12	3.62	2.16	2.02	0.31		0.9	-29.25	-177.87	-29.25	-177.87
2010	[14131] SMITH I. E. M. (2010)	samp. 46329	KERMADEC ARC / KERMADEC ISLANDS / RAOUL / RAOUL / D^ARCY FORMATION / PACIFIC OCEAN	VOLCANIC ROCK	BASALT	WHOLE ROCK	3	arc	0.82	4914.66	41.2	339.6	24.2	43.1	1.2	2.3	7.7	6.01	2.13	0.78	2.87	3.45	1.92	1.93	0.31	1.5	0.3	-29.25	-177.87	-29.25	-177.87
2010	[14131] SMITH I. E. M. (2010)	samp. 46330	KERMADEC ARC / KERMADEC ISLANDS / RAOUL / RAOUL / MOUMOUKAI FORMATION / PACIFIC OCEAN	VOLCANIC ROCK	BASALT	WHOLE ROCK	3	arc	0.92	5514.01	40.9	338.6	24.7	49.7	1.4	5.5	7.1	7.49	2.49	0.82	3.12	3.54	2	1.94	0.32	1.3	0.4	-29.25	-177.87	-29.25	-177.87
2010	[14131] SMITH I. E. M. (2010)	samp. 46325	KERMADEC ARC / KERMADEC ISLANDS / RAOUL / RAOUL / HUTCHISON FORMATION / PACIFIC OCEAN	VOLCANIC ROCK	BASALT	WHOLE ROCK	3	arc	1.02	6113.36	52.3	503.5	24.8	44.7	1.4	0.9	8.6	6.04	2.22	0.76	2.79	3.58	2.05	1.99	0.32	1.2	0.2	-29.25	-177.87	-29.25	-177.87
2010	[14131] SMITH I. E. M. (2010)	samp. 23396	KERMADEC ARC / KERMADEC ISLANDS / RAOUL / RAOUL / D^ARCY FORMATION / PACIFIC OCEAN	VOLCANIC ROCK	BASALT	WHOLE ROCK	3	arc	0.83	4974.6	40.7	292.2	25.1	40.8	1.4	3.1	8.1	6.04	2.02	0.73	2.88	3.47	2.03	1.87	0.29		0.7	-29.25	-177.87	-29.25	-177.87
2010	[14131] SMITH I. E. M. (2010)	samp. 7104	KERMADEC ARC / KERMADEC ISLANDS / RAOUL / RAOUL / HUTCHISON FORMATION / PACIFIC OCEAN	VOLCANIC ROCK	BASALT	WHOLE ROCK	3	arc	1.02	6113.36	46.3	480.7	25.7	44.8	1.5	4.2	10.2	6.44	2.17	0.79	3.08	3.71	2.12	2.05	0.31		0.1	-29.25	-177.87	-29.25	-177.87
2010	[14131] SMITH I. E. M. (2010)	samp. 23370	KERMADEC ARC / KERMADEC ISLANDS / RAOUL / RAOUL / HUTCHISON FORMATION / PACIFIC OCEAN	VOLCANIC ROCK	BASALT	WHOLE ROCK	3	arc	0.92	5514.01	46.1	410.6	25.9	47.4	1.4	2.1	9	5.69	2.18	0.76	2.74	3.43	2.02	1.96	0.33		0.5	-29.25	-177.87	-29.25	-177.87
2010	[14131] SMITH I. E. M. (2010)	samp. 7151	KERMADEC ARC / KERMADEC ISLANDS / RAOUL / RAOUL / BOAT COVE FORMATION - WILSON MEMBER / PACIFIC OCEAN	VOLCANIC ROCK	BASALT	WHOLE ROCK	3	arc	0.79	4734.86	45.3	370.9	26.8	52.5	1.5	2.3	8.7	5.94	2.11	0.72	2.79	3.5	2.06	1.96	0.3		0.7	-29.25	-177.87	-29.25	-177.87
2010	[14131] SMITH I. E. M. (2010)	samp. 7111	KERMADEC ARC / KERMADEC ISLANDS / RAOUL / RAOUL / D^ARCY FORMATION / PACIFIC OCEAN	VOLCANIC ROCK	BASALT	WHOLE ROCK	3	arc	0.83	4974.6	42.8	347.7	27.1	54.4	1.5	1.5	11.4	8.93	2.83	0.88	3.53	4.03	2.3	2.24	0.39		0.3	-29.25	-177.87	-29.25	-177.87
2010	[14131] SMITH I. E. M. (2010)	samp. 46328	KERMADEC ARC / KERMADEC ISLANDS / RAOUL / RAOUL / D^ARCY FORMATION / PACIFIC OCEAN	VOLCANIC ROCK	BASALT	WHOLE ROCK	3	arc	0.95	5693.81	34.5	298.2	28.3	49.7	1.6	4.5	7.8	7.36	2.59	0.89	3.39	4.01	2.27	2.15	0.33		0.3	-29.25	-177.87	-29.25	-177.87
2010	[14131] SMITH I. E. M. (2010)	samp. 23382	KERMADEC ARC / KERMADEC ISLANDS / RAOUL / RAOUL / BOAT COVE FORMATION - MEYER MEMBER / PACIFIC OCEAN	VOLCANIC ROCK	BASALT	WHOLE ROCK	3	arc	1.13	6772.64	46.6	493.9	28.7	58.9	1.6	3.7	8.1	7.91	2.73	0.95	3.62	4.19	2.39	2.42	0.39		0.6	-29.25	-177.87	-29.25	-177.87
2010	[14131] SMITH I. E. M. (2010)	samp. 23397	KERMADEC ARC / KERMADEC ISLANDS / RAOUL / RAOUL / D^ARCY FORMATION / PACIFIC OCEAN	VOLCANIC ROCK	BASALT	WHOLE ROCK	3	arc	1.21	7252.12	50.1	545.6	29.9	60	1.8	3.6	11.1	8.38	2.68	0.94	3.48	4.13	2.5	2.29	0.39		0.3	-29.25	-177.87	-29.25	-177.87
2013	[17055] BARKER S. J. (2013)	samp. RI06_MB2	KERMADEC ARC / KERMADEC ISLANDS / RAOUL / RAOUL / MATATIROHIA FORMATION / PACIFIC OCEAN	VOLCANIC ROCK	BASALT	WHOLE ROCK	3	arc	0.61	3656.03	44.1132	356.758	13.0982	23.3094	0.351018	1.34398	3.77179	3.50143	1.30725	0.532574	1.74534	2.25738	1.48648	1.5114	0.226794	0.971069	0.531378	-29.25	-177.87	-29.25	-177.87
2013	[17055] BARKER S. J. (2013)	samp. RI06_MB11	KERMADEC ARC / KERMADEC ISLANDS / RAOUL / RAOUL / MATATIROHIA FORMATION / PACIFIC OCEAN	VOLCANIC ROCK	BASALT	WHOLE ROCK	3	arc	0.61	3656.03	49.9926	349.933	13.5328	21.4674	0.409311	1.33721	3.659	3.46906	1.21147	0.515669	1.6743	2.26653	1.45472	1.47424	0.22414	0.787073	0.18241	-29.25	-177.87	-29.25	-177.87
1997	[2495] TURNER SIMON P. (1997)	samp. 45658	KERMADEC ARC / KERMADEC ISLANDS / MACAULEY / SANDY BAY TEPHRA / PACIFIC OCEAN	VOLCANIC ROCK	BASALT	WHOLE ROCK	3	arc	0.65	3895.77	38	305	13	32	0.29	3.18	7.56	6.39	1.73	0.65	2.03	2.16	1.29	1.3	0.2	0.84	0.467	-30.7	-178.42	-30.7	-178.42
1997	[2495] TURNER SIMON P. (1997)	samp. 45653	KERMADEC ARC / KERMADEC ISLANDS / MACAULEY / SANDY BAY TEPHRA / PACIFIC OCEAN	VOLCANIC ROCK	BASALT	WHOLE ROCK	3	arc	0.62	3715.96	36	304	13	38	0.45	3.97	9.82	8.14	2.13	0.75	2.44	2.3	1.35	1.26	0.2	1.02	0.438	-30.7	-178.42	-30.7	-178.42
1997	[2495] TURNER SIMON P. (1997)	samp. 7125	KERMADEC ARC / KERMADEC ISLANDS / RAOUL / RAOUL / PACIFIC OCEAN	VOLCANIC ROCK	BASALT	WHOLE ROCK	3	arc	0.72	4315.31	45	309	14	33	0.25	2.3	4.3	4.2	1.41	0.58	2.08	2.36	1.43	1.58	0.23	0.94	0.197	-29.25	-177.87	-29.25	-177.87
1997	[2495] TURNER SIMON P. (1997)	samp. T2	KERMADEC ARC / KERMADEC ISLANDS / RAOUL / RAOUL / PACIFIC OCEAN	VOLCANIC ROCK	BASALT	WHOLE ROCK	3	arc	0.75	4495.12	39	319	16	38	0.24	2.39	6.31	5.7	1.81	0.72	2.44	2.86	1.88	1.92	0.31	1.01	0.235	-29.25	-177.87	-29.25	-177.87
1997	[2495] TURNER SIMON P. (1997)	samp. 37478	KERMADEC ARC / KERMADEC ISLANDS / L^ESPERANCE / PACIFIC OCEAN	VOLCANIC ROCK	BASALT	WHOLE ROCK	3	arc	0.94	5633.88	39	297	19	37	0.48	2.9	6.4	5.5	1.77	0.77				1.87	0.3	1.15	0.46	-31.43	-178.9	-31.43	-178.9
1997	[2495] TURNER SIMON P. (1997)	samp. 45657	KERMADEC ARC / KERMADEC ISLANDS / MACAULEY / SANDY BAY TEPHRA / PACIFIC OCEAN	VOLCANIC ROCK	BASALT	WHOLE ROCK	3	arc	0.88	5274.27	51	391	20	41	1.3	4.5	10.3	7.9	2.35	0.86				1.75	0.28	1.25	0.51	-30.7	-178.42	-30.7	-178.42
1997	[2495] TURNER SIMON P. (1997)	samp. 37486	KERMADEC ARC / KERMADEC ISLANDS / L^ESPERANCE / PACIFIC OCEAN	VOLCANIC ROCK	BASALT	WHOLE ROCK	3	arc	0.97	5813.68	40	363	21	39	0.32	3.2	7.8	6.4	2.16	0.85				2.1	0.33	1.22	0.496	-31.43	-178.9	-31.43	-178.9
1997	[2495] TURNER SIMON P. (1997)	samp. T9	KERMADEC ARC / KERMADEC ISLANDS / RAOUL / RAOUL / PACIFIC OCEAN	VOLCANIC ROCK	BASALT	WHOLE ROCK	3	arc	0.71	4255.38	34	280	22	37	0.14	1.42	3.99	4.07	1.56	0.63	2.16	2.75	1.79	1.87	0.28	0.98	0.18	-29.25	-177.87	-29.25	-177.87
1997	[2495] TURNER SIMON P. (1997)	samp. R38	KERMADEC ARC / KERMADEC ISLANDS / RAOUL / RAOUL / PACIFIC OCEAN	VOLCANIC ROCK	BASALT	WHOLE ROCK	3	arc	0.82	4914.66	41	312	22	41	0.32	2.3	6.01	6.1	2.16	0.81	2.87	3.45	1.92	2.4	0.37	1.29	0.233	-29.25	-177.87	-29.25	-177.87
1997	[2495] TURNER SIMON P. (1997)	samp. 7090	KERMADEC ARC / KERMADEC ISLANDS / RAOUL / RAOUL / PACIFIC OCEAN	VOLCANIC ROCK	BASALT	WHOLE ROCK	3	arc	1.01	6053.42	48	532	22	42	0.32	2.4	6.6	6	2.28	0.86	3.02	3.65	2.19	2.55	0.41	1.28	0.252	-29.25	-177.87	-29.25	-177.87
1997	[2495] TURNER SIMON P. (1997)	samp. 14831	KERMADEC ARC / KERMADEC ISLANDS / L^ESPERANCE / PACIFIC OCEAN	VOLCANIC ROCK	BASALT	WHOLE ROCK	3	arc			42	345	22	42	0.41	3.56	9.61	7.7	2.4	1.11	3.18	3.82	2.46	2.39	0.39	1.28	0.577	-31.43	-178.9	-31.43	-178.9
1997	[2495] TURNER SIMON P. (1997)	samp. R34	KERMADEC ARC / KERMADEC ISLANDS / RAOUL / RAOUL / PACIFIC OCEAN	VOLCANIC ROCK	BASALT	WHOLE ROCK	3	arc	1.02	6113.36	52	477	23	43	0.29	2.7	6.6	6.5	2.26	0.85	2.79	3.58	2.05	2.58	0.41	1.31	0.284	-29.25	-177.87	-29.25	-177.87
1997	[2495] TURNER SIMON P. (1997)	samp. T16	KERMADEC ARC / KERMADEC ISLANDS / RAOUL / RAOUL / PACIFIC OCEAN	VOLCANIC ROCK	BASALT	WHOLE ROCK	3	arc	0.7	4195.44	35	251	24	37	0.17	1.68	4.69	4.9	2.06	0.82	3.07	4.08	2.74	2.86	0.47	1.09	0.133	-29.25	-177.87	-29.25	-177.87
1997	[2495] TURNER SIMON P. (1997)	samp. T5	KERMADEC ARC / KERMADEC ISLANDS / RAOUL / RAOUL / PACIFIC OCEAN	VOLCANIC ROCK	BASALT	WHOLE ROCK	3	arc	0.97	5813.68	40	329	27	57	0.42	2.79	7.58	7.08	2.37	0.86	3.19	3.9	2.41	2.51	0.39	1.6	0.439	-29.25	-177.87	-29.25	-177.87
1997	[2495] TURNER SIMON P. (1997)	samp. R4	KERMADEC ARC / KERMADEC ISLANDS / RAOUL / RAOUL / PACIFIC OCEAN	VOLCANIC ROCK	BASALT	WHOLE ROCK	3	arc	0.5	2996.74	25	53	33	65	0.4	3.69	10.08	9.37	3.45	1.14	4.76	6.29	4.26	4.38	0.74	2.23	0.333	-29.25	-177.87	-29.25	-177.87
1997	[2495] TURNER SIMON P. (1997)	samp. 7088	KERMADEC ARC / KERMADEC ISLANDS / RAOUL / RAOUL / HUTCHISON FORMATION / PACIFIC OCEAN	VOLCANIC ROCK	BASALT	WHOLE ROCK	3	arc	1.23	7371.99	41	294	37	75	0.82	4.4	13	11.7	3.84	1.35	4.61	5.41	3.15	3.95	0.62	2.37	0.563	-29.25	-177.87	-29.25	-177.87
1997	[2495] TURNER SIMON P. (1997)	samp. R29	KERMADEC ARC / KERMADEC ISLANDS / RAOUL / RAOUL / PACIFIC OCEAN	VOLCANIC ROCK	BASALT	WHOLE ROCK	3	arc	0.59	3536.16	21	27	40	75	0.52	3.24	9.29	8.95	3.27	1.11	4.61	6.03	3.96	4.24	0.66	2.49	0.424	-29.25	-177.87	-29.25	-177.87
1977	[2770] EWART A. (1977)	samp. 7128	KERMADEC ARC / KERMADEC ISLANDS / RAOUL / RAOUL / PACIFIC OCEAN	VOLCANIC ROCK	BASALT	WHOLE ROCK	3	arc	0.69	4135.51		350	9.4	16	0.45	1.1	3	2.8	0.96	0.42	1.5	1.8	1.2	1.18	0.18	0.51	0.21	-29.25	-177.87	-29.25	-177.87
1977	[2770] EWART A. (1977)	samp. 10380	KERMADEC ARC / KERMADEC ISLANDS / MACAULEY / PACIFIC OCEAN	VOLCANIC ROCK	BASALT	WHOLE ROCK	3	arc	0.89	5334.21		365	13	37	0.61	4.1	8.7	7.9	2.1	0.74	2.5	2.7	1.7	1.6	0.25	1.1	0.47	-30.22	-178.55	-30.22	-178.55
1994	[3056] EWART A. (1994)	samp. 10415	KERMADEC ARC / KERMADEC ISLANDS / MACAULEY / PACIFIC OCEAN	VOLCANIC ROCK	BASALT	WHOLE ROCK	3	arc	0.55	3296.42	48	280	13	15	0.22	1.23	3.28	3.14	1.15	0.47	1.55	1.82	1.09	1.06	0.17	0.57	0.13	-30.22	-178.55	-30.22	-178.55
1994	[3056] EWART A. (1994)	samp. 7101	KERMADEC ARC / KERMADEC ISLANDS / RAOUL / RAOUL / PACIFIC OCEAN	VOLCANIC ROCK	BASALT	WHOLE ROCK	3	arc	0.85	5094.47	39	360	21	32	0.4	2.52	6.4	5.84	2.03	0.73	2.67	3.17	1.99	2.05	0.34	1.19	0.31	-29.25	-177.87	-29.25	-177.87
1993	[3319] GAMBLE J. A. (1993)	samp. AU37546	KERMADEC ARC / KERMADEC ISLANDS / MACAULEY / PACIFIC OCEAN	VOLCANIC ROCK	BASALT	WHOLE ROCK	3	arc	0.52	3116.61	44	300	11	20	1	7.5	3.85	3.68	1.18	0.45				1.81	0.16	0.6	0.8	-30.22	-178.55	-30.22	-178.55
1993	[3319] GAMBLE J. A. (1993)	samp. AU37548	KERMADEC ARC / KERMADEC ISLANDS / MACAULEY / PACIFIC OCEAN	VOLCANIC ROCK	BASALT	WHOLE ROCK	3	arc	0.52	3116.61	44	297	11	18	1	7.6	6.19	4.27	1.25	0.47				1.61	0.18	0.62	0.84	-30.22	-178.55	-30.22	-178.55
1993	[3319] GAMBLE J. A. (1993)	samp. AU23378	KERMADEC ARC / KERMADEC ISLANDS / RAOUL / RAOUL / PACIFIC OCEAN	VOLCANIC ROCK	BASALT	WHOLE ROCK	3	arc	0.68	4075.57	42	323	18	29	1	4.1	3.84	3.36	1.54	0.58				1.61	0.28	0.8	0.57	-29.25	-177.87	-29.25	-177.87
1993	[3319] GAMBLE J. A. (1993)	samp. AU23376	KERMADEC ARC / KERMADEC ISLANDS / RAOUL / RAOUL / PACIFIC OCEAN	VOLCANIC ROCK	BASALT	WHOLE ROCK	3	arc	0.6	3596.09	36	290	19	37	1	3.8	8.07	7.09	1.97	0.72				1.84	0.3	1.07	0.52	-29.25	-177.87	-29.25	-177.87
1993	[3319] GAMBLE J. A. (1993)	samp. AU14837	KERMADEC ARC / KERMADEC ISLANDS / L^ESPERANCE / PACIFIC OCEAN	VOLCANIC ROCK	BASALT	WHOLE ROCK	3	arc	1.01	6053.42	39	388	21	37	1	3.3	9.69	7.82	2.42	0.94				2.01	0.34	1.25	0.4	-31.43	-178.9	-31.43	-178.9
1993	[3319] GAMBLE J. A. (1993)	samp. AU23396	KERMADEC ARC / KERMADEC ISLANDS / RAOUL / RAOUL / PACIFIC OCEAN	VOLCANIC ROCK	BASALT	WHOLE ROCK	3	arc	0.77	4614.99	37	275	24	32	1	3.8	7.84	5.28	2.09	0.78				2.5	0.37	0.93	0.53	-29.25	-177.87	-29.25	-177.87
1998	[3371] EWART A. (1998)	samp. 10415	KERMADEC ARC / KERMADEC ISLANDS / MACAULEY / PACIFIC OCEAN	VOLCANIC ROCK	BASALT	WHOLE ROCK	3	arc			46.1	280	9.62	16.6	0.22	1.05	3.48	3.09	1.12	0.417	1.401	1.58	1	0.971	0.147	0.53	0.131	-30.22	-178.55	-30.22	-178.55
1998	[3371] EWART A. (1998)	samp. 10379	KERMADEC ARC / KERMADEC ISLANDS / MACAULEY / PACIFIC OCEAN	VOLCANIC ROCK	BASALT	WHOLE ROCK	3	arc			35.2	269	11.6	25.7	0.44	2.96	7.7	5.69	1.7	0.62	1.99	1.99	1.24	1.17	0.178	0.78	0.395	-30.22	-178.55	-30.22	-178.55
1998	[3371] EWART A. (1998)	samp. 10378	KERMADEC ARC / KERMADEC ISLANDS / MACAULEY / PACIFIC OCEAN	VOLCANIC ROCK	BASALT	WHOLE ROCK	3	arc			41.1	345	14.8	36	0.56	3.8	9.42	7.1	2.13	0.736	2.36	2.38	1.38	1.35	0.21	0.888	0.501	-30.22	-178.55	-30.22	-178.55
1998	[3371] EWART A. (1998)	samp. 14782	KERMADEC ARC / KERMADEC ISLANDS / HERALD / HERALD / BOAT COVE FORMATION / PACIFIC OCEAN	VOLCANIC ROCK	BASALT	WHOLE ROCK	3	arc			48.4	316	15.3	28.8	0.31	1.37	4.59	4.37	1.63	0.619	2.19	2.6	1.64	1.63	0.238	0.974	0.167	-29.25	-177.87	-29.25	-177.87
1998	[3371] EWART A. (1998)	samp. 7101	KERMADEC ARC / KERMADEC ISLANDS / RAOUL / RAOUL / PACIFIC OCEAN	VOLCANIC ROCK	BASALT	WHOLE ROCK	3	arc			34.8	329	15.6	27.5	0.37	2.26	6.45	5.53	1.81	0.689	2.36	2.68	1.75	1.67	0.263	0.95	0.245	-29.25	-177.87	-29.25	-177.87
1998	[3371] EWART A. (1998)	samp. 10380	KERMADEC ARC / KERMADEC ISLANDS / MACAULEY / PACIFIC OCEAN	VOLCANIC ROCK	BASALT	WHOLE ROCK	3	arc			48.8	411	17.2	38.4	0.57	4.68	9.94	7.72	2.33	0.793	2.66	2.73	1.65	1.62	0.247	1.02	0.581	-30.22	-178.55	-30.22	-178.55
2002	[6185] HAASE K. M. (2002)	samp. 9819	KERMADEC ARC / KERMADEC ISLANDS / RAOUL / RAOUL / BOAT COVE FORMATION / PACIFIC OCEAN	VOLCANIC ROCK	BASALT	WHOLE ROCK	3	arc	0.65	3895.77	47.8		15.1	26.7	0.25	1.22	3.63	3.65	1.41	0.54	1.99	2.71	1.86	1.82	0.28	1.04	0.17	-29.27	-177.92	-29.27	-177.92
2002	[6185] HAASE K. M. (2002)	samp. 9820	KERMADEC ARC / KERMADEC ISLANDS / RAOUL / RAOUL / BOAT COVE FORMATION / PACIFIC OCEAN	VOLCANIC ROCK	BASALT	VOLCANIC GLASS	3	arc	1.42	8510.75	47.3		19.3	32.5	0.28	1.46	4.35	4.44	1.71	0.64	2.52	3.54	2.46	2.46	0.37	1.4	0.21	-29.27	-177.92	-29.27	-177.92
2003	[6437] SMITH I. E. M. (2003)	samp. 45649	KERMADEC ARC / KERMADEC ISLANDS / MACAULEY / SANDY BAY TEPHRA / PACIFIC OCEAN	VOLCANIC ROCK	BASALT	WHOLE ROCK	3	arc	0.43	2577.2	36.9	249.95	9.11	14.5	0.5	1.39	3.37	3.07	0.94	0.39	1.27	1.39	0.86	0.86	0.14	0.53	0.14	-30.7	-178.42	-30.7	-178.42
2003	[6437] SMITH I. E. M. (2003)	samp. 45652	KERMADEC ARC / KERMADEC ISLANDS / MACAULEY / SANDY BAY TEPHRA / PACIFIC OCEAN	VOLCANIC ROCK	BASALT	WHOLE ROCK	3	arc	0.65	3895.77	34.73	281.31	12.7	31.3	0.82	3.38	8.27	6.29	1.81	0.69	2.14	2.05	1.21	1.2	0.18	1.01	0.35	-30.7	-178.42	-30.7	-178.42
2003	[6437] SMITH I. E. M. (2003)	samp. 45656	KERMADEC ARC / KERMADEC ISLANDS / MACAULEY / SANDY BAY TEPHRA / PACIFIC OCEAN	VOLCANIC ROCK	BASALT	WHOLE ROCK	3	arc	0.87	5214.34	43.25	343.22	14.99	33.8	0.81	3.49	8.83	7.12	2.05	0.75	2.37	2.47	1.45	1.45	0.23	1.17	0.42	-30.7	-178.42	-30.7	-178.42
2007	[10608] PEARCE J. A.(2007) [GeoReM [2940] ]	samp. 10380	KERMADEC ARC / KERMADEC ISLANDS / MACAULEY / PACIFIC OCEAN	VOLCANIC ROCK	BASALT, THOLEIITIC	WHOLE ROCK	3	arc			48.8	411	17.2	38.4	0.57	4.68	9.94	7.72	2.33	0.79	2.66	2.73	1.65	1.62	0.25	1.02	0.58	-30.22	-178.55	-30.22	-178.55
2011	[15652] TODD E.(2011) [GeoReM [6234] ]	samp. X444	KERMADEC ARC / HAVRE TROUGH / NGATORO RIFT / PACIFIC OCEAN	VOLCANIC ROCK	ANDESITE, BASALTIC	WHOLE ROCK	4	trough	0.86	5154.4	20	308	20	61	1.3	6.39	14.1	9.8	2.61	0.89	3.05	3.28	2.11	2.06	0.32	1.67	1.14	-36.14	177.71	-36.14	177.71
2011	[15652] TODD E.(2011) [GeoReM [6234] ]	samp. X442	KERMADEC ARC / HAVRE TROUGH / NGATORO RIFT / PACIFIC OCEAN	VOLCANIC ROCK	ANDESITE, BASALTIC	WHOLE ROCK	4	trough	1.05	6293.16	25	344	23	65	1	3.75	9.5	7.9	2.69	0.91	3.31	3.98	2.71	2.62	0.41	1.85	0.49	-36.17	177.64	-36.17	177.64
2012	[16844] WYSOCZANSKI R. J.(2012) [GeoReM [8535] ]	samp. 987-9	KERMADEC ARC / NGATOROIRANGI RIFT / PACIFIC OCEAN	VOLCANIC ROCK	ANDESITE, BASALTIC	VOLCANIC GLASS	4	trough	0.93	5573.94	32.3	293	16.4	49.8	1.16	2.61	9.4	6.99	2.31	0.893	2.7	3.22	1.67	1.72	0.277	1.29	0.304	-33.521	179.551	-33.521	179.551
2012	[16844] WYSOCZANSKI R. J.(2012) [GeoReM [8535] ]	samp. 986-6	KERMADEC ARC / NGATOROIRANGI RIFT / PACIFIC OCEAN	VOLCANIC ROCK	ANDESITE, BASALTIC	VOLCANIC GLASS	4	trough	1.27	7611.73	31.8	305	22.1	68.9	0.932	2.55	9.88	8.7	2.64	1.21	3.5	3.8	2.36	2.21	0.35	1.88	0.211	-33.467	179.545	-33.467	179.545
2012	[16844] WYSOCZANSKI R. J.(2012) [GeoReM [8535] ]	samp. 006	KERMADEC ARC / BROTHERS RIDGE / PACIFIC OCEAN	VOLCANIC ROCK	ANDESITE, BASALTIC	VOLCANIC GLASS	4	trough	1.25	7491.86	23.2	503	23.1	79.6	1.79	7.25	19.9	11.9	3.19	1.12	3.31	4.04	2.48	2.37	0.395	2.08	1.316	-34.824	179.142	-34.824	179.142
2006	[9042] WYSOCZANSKI R. J. (2006)	samp. X153/1	KERMADEC ARC / HAVRE TROUGH / NGATORO RIFT / PACIFIC OCEAN	VOLCANIC ROCK	ANDESITE, BASALTIC	VOLCANIC GLASS	4	trough			33	246.7	24.5	99.1	2.3	4.81	13.69	10.12	3.34	1.18	3.88	4.09	2.47	2.33	0.358	2.29	0.448	-36.2545	177.315	-36.2545	177.315
2006	[9042] WYSOCZANSKI R. J. (2006)	samp. X153/1	KERMADEC ARC / HAVRE TROUGH / NGATORO RIFT / PACIFIC OCEAN	VOLCANIC ROCK	ANDESITE, BASALTIC	VOLCANIC GLASS	4	trough			33.1	249.3	24.7	99.8	2.27	4.79	13.67	10.15	3.17	1.2	3.85	4.23	2.49	2.44	0.381	2.27	0.463	-36.2545	177.315	-36.2545	177.315
2006	[9042] WYSOCZANSKI R. J. (2006)	samp. X185/3	KERMADEC ARC / HAVRE TROUGH / NGATORO RIFT / PACIFIC OCEAN	VOLCANIC ROCK	ANDESITE, BASALTIC	VOLCANIC GLASS	4	trough			34.7	250	24.9	139.6	6.46	11.96	28.05	14.64	3.8	1.16	3.98	4.12	2.54	2.48	0.4	3.05	1.214	-36.662	177.13	-36.662	177.13
2006	[9042] WYSOCZANSKI R. J. (2006)	samp. X185/3	KERMADEC ARC / HAVRE TROUGH / NGATORO RIFT / PACIFIC OCEAN	VOLCANIC ROCK	ANDESITE, BASALTIC	VOLCANIC GLASS	4	trough			35	250.3	25.1	140.5	6.48	12.01	28.37	14.79	3.87	1.15	3.98	4.16	2.53	2.5	0.397	3.12	1.23	-36.662	177.13	-36.662	177.13
2006	[9042] WYSOCZANSKI R. J. (2006)	samp. X185/3	KERMADEC ARC / HAVRE TROUGH / NGATORO RIFT / PACIFIC OCEAN	VOLCANIC ROCK	ANDESITE, BASALTIC	VOLCANIC GLASS	4	trough			34.8	252.7	25.1	140.6	6.53	11.96	28.52	14.75	3.94	1.17	4.07	4.17	2.57	2.52	0.398	3.18	1.248	-36.662	177.13	-36.662	177.13
2006	[9042] WYSOCZANSKI R. J. (2006)	samp. X153/1	KERMADEC ARC / HAVRE TROUGH / NGATORO RIFT / PACIFIC OCEAN	VOLCANIC ROCK	ANDESITE, BASALTIC	VOLCANIC GLASS	4	trough			34.3	255.9	25.4	103.6	2.31	4.79	13.68	10.1	3.28	1.18	3.96	4.23	2.53	2.44	0.378	2.31	0.462	-36.2545	177.315	-36.2545	177.315
2006	[9042] WYSOCZANSKI R. J. (2006)	samp. X153/1	KERMADEC ARC / HAVRE TROUGH / NGATORO RIFT / PACIFIC OCEAN	VOLCANIC ROCK	ANDESITE, BASALTIC	VOLCANIC GLASS	4	trough			34.1	259.7	25.5	103.2	2.32	4.84	13.98	10.35	3.29	1.18	3.93	4.19	2.55	2.45	0.377	2.41	0.46	-36.2545	177.315	-36.2545	177.315
2006	[9042] WYSOCZANSKI R. J. (2006)	samp. X158/4	KERMADEC ARC / HAVRE TROUGH / NGATORO RIFT / PACIFIC OCEAN	VOLCANIC ROCK	ANDESITE, BASALTIC	VOLCANIC GLASS	4	trough			30.1	258.5	29.9	109.2	3.04	3.9	12.15	10.42	3.61	1.29	4.38	4.96	2.98	2.82	0.447	2.68	0.252	-36.154	177.43	-36.154	177.43
2006	[9042] WYSOCZANSKI R. J. (2006)	samp. X158/4	KERMADEC ARC / HAVRE TROUGH / NGATORO RIFT / PACIFIC OCEAN	VOLCANIC ROCK	ANDESITE, BASALTIC	VOLCANIC GLASS	4	trough			30.8	263.9	30.6	112.2	3.16	4.05	12.59	10.59	3.74	1.34	4.64	5.09	3.11	2.94	0.446	2.76	0.264	-36.154	177.43	-36.154	177.43
2006	[9042] WYSOCZANSKI R. J. (2006)	samp. X158/1	KERMADEC ARC / HAVRE TROUGH / NGATORO RIFT / PACIFIC OCEAN	VOLCANIC ROCK	ANDESITE, BASALTIC	VOLCANIC GLASS	4	trough			31.1	266	30.9	113.2	3.13	4	12.58	10.55	3.71	1.32	4.56	5.14	3.1	2.94	0.459	2.74	0.26	-36.154	177.43	-36.154	177.43
2006	[9042] WYSOCZANSKI R. J. (2006)	samp. X158/4	KERMADEC ARC / HAVRE TROUGH / NGATORO RIFT / PACIFIC OCEAN	VOLCANIC ROCK	ANDESITE, BASALTIC	VOLCANIC GLASS	4	trough			30.9	265.1	30.9	113.3	3.18	4.13	12.84	10.87	3.73	1.39	4.57	5.28	3.14	3.07	0.48	2.81	0.262	-36.154	177.43	-36.154	177.43
2006	[9042] WYSOCZANSKI R. J. (2006)	samp. X158/1	KERMADEC ARC / HAVRE TROUGH / NGATORO RIFT / PACIFIC OCEAN	VOLCANIC ROCK	ANDESITE, BASALTIC	VOLCANIC GLASS	4	trough			31.2	267.1	31.1	114	3.21	4.05	12.6	10.65	3.64	1.36	4.62	5.13	3.15	2.86	0.452	2.75	0.273	-36.154	177.43	-36.154	177.43
2006	[9042] WYSOCZANSKI R. J. (2006)	samp. X201/1	KERMADEC ARC / HAVRE TROUGH / NGATORO RIFT / PACIFIC OCEAN	VOLCANIC ROCK	ANDESITE, BASALTIC	VOLCANIC GLASS	4	trough			40.1	487.6	31.9	89.6	2.78	8.26	19.42	12.99	3.94	1.34	4.64	5.23	3.26	3.23	0.506	2.27	1.076	-37.1353	177.297	-37.1353	177.297
2006	[9042] WYSOCZANSKI R. J. (2006)	samp. X154/2	KERMADEC ARC / HAVRE TROUGH / NGATORO RIFT / PACIFIC OCEAN	VOLCANIC ROCK	ANDESITE, BASALTIC	VOLCANIC GLASS	4	trough			31.5	283.7	32.5	122.3	3.34	5.94	16.75	12.72	4.1	1.49	4.93	5.46	3.26	3.18	0.499	2.94	0.528	-36.225	177.36	-36.225	177.36
2006	[9042] WYSOCZANSKI R. J. (2006)	samp. X154/2	KERMADEC ARC / HAVRE TROUGH / NGATORO RIFT / PACIFIC OCEAN	VOLCANIC ROCK	ANDESITE, BASALTIC	VOLCANIC GLASS	4	trough			32.1	288.5	32.6	123.2	3.38	5.87	16.67	12.59	4.11	1.47	4.88	5.41	3.25	3.1	0.486	2.81	0.497	-36.225	177.36	-36.225	177.36
2006	[9042] WYSOCZANSKI R. J. (2006)	samp. X154/2	KERMADEC ARC / HAVRE TROUGH / NGATORO RIFT / PACIFIC OCEAN	VOLCANIC ROCK	ANDESITE, BASALTIC	VOLCANIC GLASS	4	trough			31.7	280.1	32.7	122.9	3.3	5.93	16.48	12.65	4.14	1.46	4.9	5.45	3.3	3.17	0.493	2.96	0.519	-36.225	177.36	-36.225	177.36
2006	[9042] WYSOCZANSKI R. J. (2006)	samp. X154/6	KERMADEC ARC / HAVRE TROUGH / NGATORO RIFT / PACIFIC OCEAN	VOLCANIC ROCK	ANDESITE, BASALTIC	VOLCANIC GLASS	4	trough			31.4	282.4	32.8	124	3.36	5.87	16.61	12.69	4.05	1.51	4.94	5.4	3.3	3.17	0.498	2.93	0.519	-36.225	177.36	-36.225	177.36
2006	[9042] WYSOCZANSKI R. J. (2006)	samp. X154/6	KERMADEC ARC / HAVRE TROUGH / NGATORO RIFT / PACIFIC OCEAN	VOLCANIC ROCK	ANDESITE, BASALTIC	VOLCANIC GLASS	4	trough			32.4	288.5	32.9	124.1	3.4	5.95	16.87	12.7	4.05	1.46	4.98	5.41	3.32	3.17	0.496	2.94	0.505	-36.225	177.36	-36.225	177.36
2006	[9042] WYSOCZANSKI R. J. (2006)	samp. X154/2	KERMADEC ARC / HAVRE TROUGH / NGATORO RIFT / PACIFIC OCEAN	VOLCANIC ROCK	ANDESITE, BASALTIC	VOLCANIC GLASS	4	trough			32.2	291.4	33	124.1	3.45	5.99	16.94	12.69	4.08	1.46	4.93	5.47	3.36	3.14	0.509	2.96	0.498	-36.225	177.36	-36.225	177.36
2006	[9042] WYSOCZANSKI R. J. (2006)	samp. X154/6	KERMADEC ARC / HAVRE TROUGH / NGATORO RIFT / PACIFIC OCEAN	VOLCANIC ROCK	ANDESITE, BASALTIC	VOLCANIC GLASS	4	trough			32.4	289.4	33.1	125.2	3.41	5.97	16.99	12.91	4.18	1.5	4.95	5.56	3.36	3.25	0.496	3	0.531	-36.225	177.36	-36.225	177.36
2006	[9042] WYSOCZANSKI R. J. (2006)	samp. X154/1	KERMADEC ARC / HAVRE TROUGH / NGATORO RIFT / PACIFIC OCEAN	VOLCANIC ROCK	ANDESITE, BASALTIC	VOLCANIC GLASS	4	trough			30.6	306.9	34.2	125.7	3.45	6.45	17.84	13.51	4.38	1.56	5.19	5.67	3.42	3.22	0.51	2.99	0.582	-36.225	177.36	-36.225	177.36
2006	[9042] WYSOCZANSKI R. J. (2006)	samp. X154/5	KERMADEC ARC / HAVRE TROUGH / NGATORO RIFT / PACIFIC OCEAN	VOLCANIC ROCK	ANDESITE, BASALTIC	VOLCANIC GLASS	4	trough			30.6	308	34.3	125.2	3.44	6.5	17.98	13.51	4.27	1.56	5.19	5.69	3.47	3.35	0.513	2.95	0.568	-36.225	177.36	-36.225	177.36
2006	[9042] WYSOCZANSKI R. J. (2006)	samp. X154/5	KERMADEC ARC / HAVRE TROUGH / NGATORO RIFT / PACIFIC OCEAN	VOLCANIC ROCK	ANDESITE, BASALTIC	VOLCANIC GLASS	4	trough			30.8	305.2	34.4	124.8	3.43	6.42	17.76	13.41	4.24	1.52	5.2	5.69	3.46	3.22	0.491	2.94	0.544	-36.225	177.36	-36.225	177.36
2006	[9042] WYSOCZANSKI R. J. (2006)	samp. X154/5	KERMADEC ARC / HAVRE TROUGH / NGATORO RIFT / PACIFIC OCEAN	VOLCANIC ROCK	ANDESITE, BASALTIC	VOLCANIC GLASS	4	trough			31.2	310.3	34.5	127.1	3.51	6.6	18.35	13.7	4.45	1.62	5.25	5.78	3.53	3.29	0.519	3.11	0.571	-36.225	177.36	-36.225	177.36
2006	[9042] WYSOCZANSKI R. J. (2006)	samp. X154/1	KERMADEC ARC / HAVRE TROUGH / NGATORO RIFT / PACIFIC OCEAN	VOLCANIC ROCK	ANDESITE, BASALTIC	VOLCANIC GLASS	4	trough			31.2	314	35.1	127.8	3.56	6.69	18.41	13.95	4.42	1.61	5.47	5.77	3.56	3.34	0.516	3.02	0.581	-36.225	177.36	-36.225	177.36
2006	[9042] WYSOCZANSKI R. J. (2006)	samp. X154/1	KERMADEC ARC / HAVRE TROUGH / NGATORO RIFT / PACIFIC OCEAN	VOLCANIC ROCK	ANDESITE, BASALTIC	VOLCANIC GLASS	4	trough			32.2	323.3	36	132.2	3.64	6.81	18.95	14.32	4.54	1.62	5.65	5.98	3.67	3.42	0.533	3.21	0.589	-36.225	177.36	-36.225	177.36
2010	[14424] TODD E.(2010) [GeoReM [5488] ]	samp. V432A	KERMADEC ARC / HAVRE TROUGH / PACIFIC OCEAN	VOLCANIC ROCK	BASALT	WHOLE ROCK	5	trough			35	214	20.6	74	3.94	4.36	10.7	7.89	2.37	0.85	2.82	3.15	1.99	1.81	0.27	1.67	0.38	-35.72	178.05	-35.72	178.05
2012	[16844] WYSOCZANSKI R. J.(2012) [GeoReM [8535] ]	samp. PPTUW-5	KERMADEC ARC / HAVRE TROUGH / PACIFIC OCEAN	VOLCANIC ROCK	BASALT	VOLCANIC GLASS	5	trough	1.03	6173.29	31.2	263	17.2	65.2	5.6	6.81	17.7	10.9	2.92	1.08	3.06	3.12	1.85	1.86	0.24	1.59	0.65	-34.478	178.871	-34.478	178.871
1993	[3319] GAMBLE J. A. (1993)	samp. TVZ-19	KERMADEC ARC / HAVRE TROUGH / PACIFIC OCEAN	VOLCANIC ROCK	BASALT	WHOLE ROCK	5	trough			34	246	35	127	2	6.4	21.4	17.3	4.37	1.54				2.9	0.55	3.2	0.72	-25	177	-35	179
2002	[6185] HAASE K. M. (2002)	samp. 42DR-3	KERMADEC ARC / HAVRE TROUGH / KERMADEC RIDGE / PACIFIC OCEAN	VOLCANIC ROCK	BASALT	WHOLE ROCK	5	trough	0.8	4794.79	33		16.1	58.6	1.08	4.84	12.2	9.12	2.65	0.96	3.08	3.14	1.89	1.72	0.25	1.64	0.43	-30.523	-178.833	-30.523	-178.833
2002	[6185] HAASE K. M. (2002)	samp. 18DR-4	KERMADEC ARC / HAVRE TROUGH / DREDGE 18DR / PACIFIC OCEAN	VOLCANIC ROCK	BASALT	VOLCANIC GLASS	5	trough	1.28	7671.67	38.1		18.6	65.4	2.35	3.89	10.4	8.01	2.46	0.93	2.99	3.45	2.16	2.01	0.3	1.95	0.32	-29.268	-178.867	-29.268	-178.867
2002	[6185] HAASE K. M. (2002)	samp. 41DR-1	KERMADEC ARC / HAVRE TROUGH / KERMADEC RIDGE / PACIFIC OCEAN	VOLCANIC ROCK	BASALT	WHOLE ROCK	5	trough	1.05	6293.16	34.1		19.2	67.1	1.96	4.59	11.8	9.11	2.69	0.97	3.16	3.53	2.25	2.05	0.3	1.95	0.57	-30.575	-179.017	-30.575	-179.017
2002	[6185] HAASE K. M. (2002)	samp. 42DR-7	KERMADEC ARC / HAVRE TROUGH / KERMADEC RIDGE / PACIFIC OCEAN	VOLCANIC ROCK	BASALT	VOLCANIC GLASS	5	trough	0.98	5873.62	37.3		19.6	69.5	1.19	5.73	14.3	10.9	3.19	1.16	3.7	3.87	2.34	2.14	0.32	2.01	0.52	-30.523	-178.833	-30.523	-178.833
2002	[6185] HAASE K. M. (2002)	samp. 42DR-1	KERMADEC ARC / HAVRE TROUGH / KERMADEC RIDGE / PACIFIC OCEAN	VOLCANIC ROCK	BASALT	VOLCANIC GLASS	5	trough	1.06	6353.1	35.5		19.9	74.5	1.23	6.05	15	11.5	3.34	1.19	3.92	4	2.44	2.23	0.33	2.14	0.58	-30.523	-178.833	-30.523	-178.833
2002	[6185] HAASE K. M. (2002)	samp. 41DR-8	KERMADEC ARC / HAVRE TROUGH / KERMADEC RIDGE / PACIFIC OCEAN	VOLCANIC ROCK	BASALT	VOLCANIC GLASS	5	trough	1.33	7971.34	34.2		19.9	73.5	1.97	4.83	12.5	9.61	2.82	1.04	3.31	3.83	2.41	2.19	0.33	2.19	0.63	-30.575	-179.017	-30.575	-179.017
2002	[6185] HAASE K. M. (2002)	samp. 41DR-2	KERMADEC ARC / HAVRE TROUGH / KERMADEC RIDGE / PACIFIC OCEAN	VOLCANIC ROCK	BASALT	WHOLE ROCK	5	trough	0.6	3596.09	32.1		21.4	92.2	3.54	5.63	14.7	11.3	3.26	1.15	3.75	4.09	2.4	2.29	0.34	2.41	0.53	-30.575	-179.017	-30.575	-179.017
2002	[6185] HAASE K. M. (2002)	samp. 19DR-1	KERMADEC ARC / HAVRE TROUGH / KERMADEC RIDGE / PACIFIC OCEAN	VOLCANIC ROCK	BASALT	VOLCANIC GLASS	5	trough	1.92	11507.5	35.3		29	118	3.63	5.37	16	13.1	4.05	1.48	4.72	5.36	3.14	2.94	0.42	3.02	0.31	-29.267	-178.875	-29.267	-178.875
2002	[6185] HAASE K. M. (2002)	samp. 19DR-2	KERMADEC ARC / HAVRE TROUGH / KERMADEC RIDGE / PACIFIC OCEAN	VOLCANIC ROCK	BASALT	VOLCANIC GLASS	5	trough	1.99	11927	35.3		29.3	119	3.72	5.58	16.5	13.7	4.27	1.51	4.92	5.61	3.32	3.04	0.44	3.18	0.33	-29.267	-178.875	-29.267	-178.875
2002	[6185] HAASE K. M. (2002)	samp. 18DR-2	KERMADEC ARC / HAVRE TROUGH / DREDGE 18DR / PACIFIC OCEAN	VOLCANIC ROCK	BASALT	VOLCANIC GLASS	5	trough	2.12	12706.2	37.6		34.7	147	3.8	6.08	17.9	15.6	4.9	1.74	5.86	6.64	4.14	3.75	0.55	4.24	0.3	-29.268	-178.867	-29.268	-178.867
2002	[6185] HAASE K. M. (2002)	samp. 18DR-3	KERMADEC ARC / HAVRE TROUGH / DREDGE 18DR / PACIFIC OCEAN	VOLCANIC ROCK	BASALT	VOLCANIC GLASS	5	trough	2.2	13185.7	38.3		34.8	151	3.98	6.06	18.9	16	5.01	1.73	5.71	6.55	3.84	3.48	0.51	3.87	0.31	-29.268	-178.867	-29.268	-178.867
2011	[15652] TODD E.(2011) [GeoReM [6234] ]	samp. V486	KERMADEC ARC / HAVRE TROUGH / COLVILLE RIDGE / PACIFIC OCEAN	VOLCANIC ROCK	BASALT, THOLEIITIC	WHOLE ROCK	5	trough	0.9	5394.14	11	393	14	61	2.2	6.23	14.5	9.8	2.46	0.88	2.72	2.93	1.93	1.67	0.27	1.47	0.5	-35.45	177.27	-35.45	177.27
Download from GEOROC - Geochemical Database
Date of Query: Tuesday	October 31	2017
Please note: There is a List of your Query Criteria at the End of this Sheet.
Complete references (see 'CITATION' column above) - note that serial numbers [#####] correspond to record numbers from the GEOROC database
[10608] PEARCE J. A., KEMPTON P. D., GILL J. B. ; HF-ND EVIDENCE FOR THE ORIGIN AND DISTRIBUTION OF MANTLE DOMAINS IN THE SW PACIFIC ; EARTH PLANET. SCI. LETT. 260 [2007] 98-114
[13460] SMITH I. E. M., PRICE R. C., STEWART R. B., WORTHINGTON T. J. ; AN ASSESSMENT OF THE MANTLE AND SLAB COMPONENTS IN THE MAGMAS OF AN OCEANIC ARC VOLCANO: RAOUL VOLCANO, KERMADEC ARC ; J. VOLCANOL. GEOTHERM. RES. 184 [2009] 437-450
[14131] SMITH I. E. M., STEWART R. B., PRICE R. C., WORTHINGTON T. J. ; ARE ARC-TYPE ROCKS THE PRODUCTS OF MAGMA CRYSTALLISATION? OBSERVATIONS FROM A SIMPLE OCEANIC ARC VOLCANO: RAOUL ISLAND, KERMADEC ARC, SW PACIFIC ; J. VOLCANOL. GEOTHERM. RES. 190 [2010] 219-234
[15652] TODD E., GILL J. B., WYSOCZANSKI R. J., HERGT J. M., WRIGHT I. C., LEYBOURNE M. I., MORTIMER N. ; HF ISOTOPIC EVIDENCE FOR SMALL-SCALE HETEROGENEITY IN THE MODE OF MANTLE WEDGE ENRICHMENT: SOUTHERN HAVRE TROUGH AND SOUTH FIJI BASIN BACK ARCS ; GEOCHEMISTRY GEOPHYSICS GEOSYSTEMS 12 [2011]
[16844] WYSOCZANSKI R. J., HANDLER M. R., SCHIPPER C. I., LEYBOURNE M. I., CREECH J., ROTELLA M. D., NICHOLS A. R. L., WILSON C. J. N., STEWART R. B. ; THE TECTONOMAGMATIC SOURCE OF ORE METALS AND VOLATILE ELEMENTS IN THE SOUTHERN KERMADEC ARC ; ECON. GEOL. 107 [2012] 1539-1556
[17055] BARKER S. J., WILSON C. J. N., BAKER J. A., MILLET M.-A., ROTELLA M. D., WRIGHT I. C., WYSOCZANSKI R. J. ; GEOCHEMISTRY AND PETROGENESIS OF SILICIC MAGMAS IN THE INTRA-OCEANIC KERMADEC ARC ; J. PETROL. 54 [2013] 351-GEOCHEMISTRY AND PETROGENESIS OF SILICIC MAGMAS IN THE INTRA-OCEANIC KERMADEC ARC
[2495] TURNER SIMON P., HAWKESWORTH C. J., ROGERS N. W., BARTLETT J., WORTHINGTON T. J., HERGT J. M., PEARCE J. A., SMITH I. E. M. ; 238U-230TH DISEQUILIBRIA MAGMA PETROGENESIS AND FLUX RATES BENEATH THE DEPLETED TONGA-KERMADEC ISLAND ARC ; GEOCHIM. COSMOCHIM. ACTA 61 [1997] 4855-4884
[2770] EWART A., BROTHERS R. N., MATEEN A. ; AN OUTLINE OF THE GEOLOGY AND GEOCHEMISTRY, AND THE POSSIBLE PETROGENETIC EVOLUTION OF THE VOLCANIC ROCKS OF THE TONGA-KERMADEC-NEW ZEALAND ISLAND ARC ; J. VOLCANOL. GEOTHERM. RES. 2 [1977] 205-250
[3056] EWART A., BRYAN W. B., CHAPPELL B. W., RUDNICK R. L. ; REGIONAL GEOCHEMISTRY OF THE LAU-TONGA ARC AND BACK-ARC SYSTEMS ; PROC. OCEAN DRILL. PROGRAM, SCIENT. RESULTS 135 [1994] 385-425
[3319] GAMBLE J. A., SMITH I. E. M., MCCULLOCH M. T., GRAHAM I. J., KOKELAAR B. P. ; THE GEOCHEMISTRY AND PETROGENESIS OF BASALTS FROM THE TAUPO VOLCANIC ZONE AND KERMADEC ISLAND ARC, S.W. PACIFIC ; J. VOLCANOL. GEOTHERM. RES. 54 [1993] 265-290
[3371] EWART A., COLLERSON K. D., REGELOUS M., WENDT J. I., NIU YAOLING ; GEOCHEMICAL EVOLUTION WITHIN THE TONGA-KERMADEC-LAU ARC-BACK-ARC SYSTEMS: THE ROLE OF VARYING MANTLE WEDGE COMPOSITION IN SPACE AND TIME ; J. PETROL. 39 [1998] 331-368
[6185] HAASE K. M., WORTHINGTON T. J., STOFFERS P., GARBE-SCHÖNBERG D., WRIGHT I. C. ; MANTLE DYNAMICS, ELEMENT RECYCLING, AND MAGMA GENESIS BENEATH THE KERMADEC ARC-HAVRE TROUGH ; GEOCHEMISTRY GEOPHYSICS GEOSYSTEMS 3 [2002]
[6437] SMITH I. E. M., STEWART R. B., PRICE R. C. ; THE PETROLOGY OF A LARGE INTRA-OCEANIC SILICIC ERUPTION: THE SANDY BAY TEPHRA, KERMADEC ARC, SOUTHWEST PACIFIC ; J. VOLCANOL. GEOTHERM. RES. 124 [2003] 173-194
[9042] WYSOCZANSKI R. J., WRIGHT I. C., GAMBLE J. A., HAURI E. H., LUHR J. F., EGGINS S. M., HANDLER M. R. ; VOLATILE CONTENTS OF KERMADEC ARC-HAVRE TROUGH PILLOW GLASSES: FINGERPRINTING SLAB-DERIVED AQUEOUS FLUIDS IN THE MANTLE SOURCES OF ARC AND BACK-ARC LAVAS ; J. VOLCANOL. GEOTHERM. RES. 152 [2006] 51-73
